# Supplementary material for: Organocatalytic discrimination of non-directing aryl and heteroaryl groups: enantioselective synthesis of bioactive indole-containing triarylmethanes
Source: Royal Society of Chemistry journal article supplement (doi:10.1039/d2sc00636g), 2022-01-01

Supplementary Information

**Organocatalytic Discrimination of Non-Directing Aryl and Heteroaryl Groups:  
Enantioselective Synthesis of Bioactive Indole-Containing Triarylmethanes**

Qiaolin YAN<sup>a†</sup>, Meng Duan<sup>b,††</sup>, Cien Chen<sup>c,d</sup>, Zhiqing Deng<sup>d,e</sup>, Mandi Wu<sup>c,d</sup>,  
Peiyuan Yu<sup>f</sup>, Ming-Liang He<sup>\*c,d</sup>, Guangyu Zhu<sup>\*d,e</sup>, K. N. Houk<sup>\*b</sup> and Jianwei Sun<sup>\*a,g</sup>

<sup>a</sup> *Department of Chemistry and the Hong Kong Branch of Chinese National Engineering Research Centre for Tissue Restoration & Reconstruction, The Hong Kong University of Science and Technology (HKUST), Clear Water Bay, Kowloon, Hong Kong SAR, China.*

<sup>b</sup> *Department of Chemistry and Biochemistry, University of California, Los Angeles, California 90095, USA.*

<sup>c</sup> *Department of Biomedical Sciences, City University of Hong Kong, Kowloon Tong, Hong Kong SAR, China.*

<sup>d</sup> *CityU Shenzhen Research Institute, Shenzhen, China.*

<sup>e</sup> *Department of Chemistry, City University of Hong Kong, Kowloon Tong, Hong Kong SAR, China.*

<sup>f</sup> *Department of Chemistry and Shenzhen Grubbs Institute, Guangdong Provincial Key Laboratory of Catalysis, Southern University of Science and Technology, Shenzhen, 518055, China.*

<sup>g</sup> *Shenzhen Research Institute, HKUST, No. 9 Yuexing 1st Rd, Shenzhen 518057, China*

<sup>†</sup> *These authors contributed equally to this work.*

## Table of Contents

|                                                              |      |
|--------------------------------------------------------------|------|
| I. General Information .....                                 | S-3  |
| II. Synthesis of the Tertiary Alcohol Substrates .....       | S-4  |
| III. Catalytic Asymmetric Synthesis of Triarylmethanes ..... | S-14 |
| IV. Study on the Influence of Additives.....                 | S-29 |
| V. Mechanistic Experiments .....                             | S-31 |
| VI. Study of the Product Biological Activities.....          | S-35 |
| VII. DFT Studies .....                                       | S-38 |
| VIII. Determination of the Absolute Stereochemistry.....     | S-40 |

### NMR Spectra and HPLC Traces

## I. General Information

Flash column chromatography was performed over silica gel (200-300 mesh) purchased from Qindao Puke Co., China. All air or moisture sensitive reactions were conducted in oven-dried glassware under nitrogen atmosphere using anhydrous solvents. Anhydrous dichloromethane, diethyl ether, and tetrahydrofuran were purified by the Innovative® solvent purification system or distilled under common conditions.  $^1\text{H}$ ,  $^{13}\text{C}$  and  $^{19}\text{F}$  NMR spectra were collected on a Bruker AV 400 MHz NMR spectrometer using residue solvent peaks as an internal standard ( $^1\text{H}$  NMR: acetone- $d_6$  at 2.05 ppm;  $^{13}\text{C}$  NMR: acetone- $d_6$  at 29.84 ppm). Data for  $^1\text{H}$  NMR are recorded as follows: chemical shift ( $\delta$ , ppm), multiplicity (s = singlet; d = doublet; t = triplet; q = quartet; m = multiplet; br = broad), coupling constant (Hz), integration. Mass spectra were collected on an Agilent GC/MS 5975C system, a MALDI Micro MX mass spectrometer, or an API QSTAR XL System. IR spectra were recorded on Bruker TENSOR 27 spectrometer and reported in terms of frequency of absorption ( $\text{cm}^{-1}$ ). Optical rotations were measured on JASCO P-2000 polarimeter with  $[\alpha]^D$  values reported in degrees; concentration (c) is in 5 mg/mL. The enantiomeric excess values were determined by chiral HPLC using an Agilent 1200 LC instrument with Daicel CHIRALCEL OD-H or Daicel CHIRALPAK AD-H columns.

## II. Synthesis of the Tertiary Alcohol Substrates

Substrates **1b**, **1i**, **1m** and **1n** were prepared according to General Procedure A. Substrates **1h**, **1o** and **1p** were prepared according to General Procedure B. Substrates **1a**, **1c-g** and **1j-l** are known compounds and were prepared according to the literature procedure.<sup>1</sup>

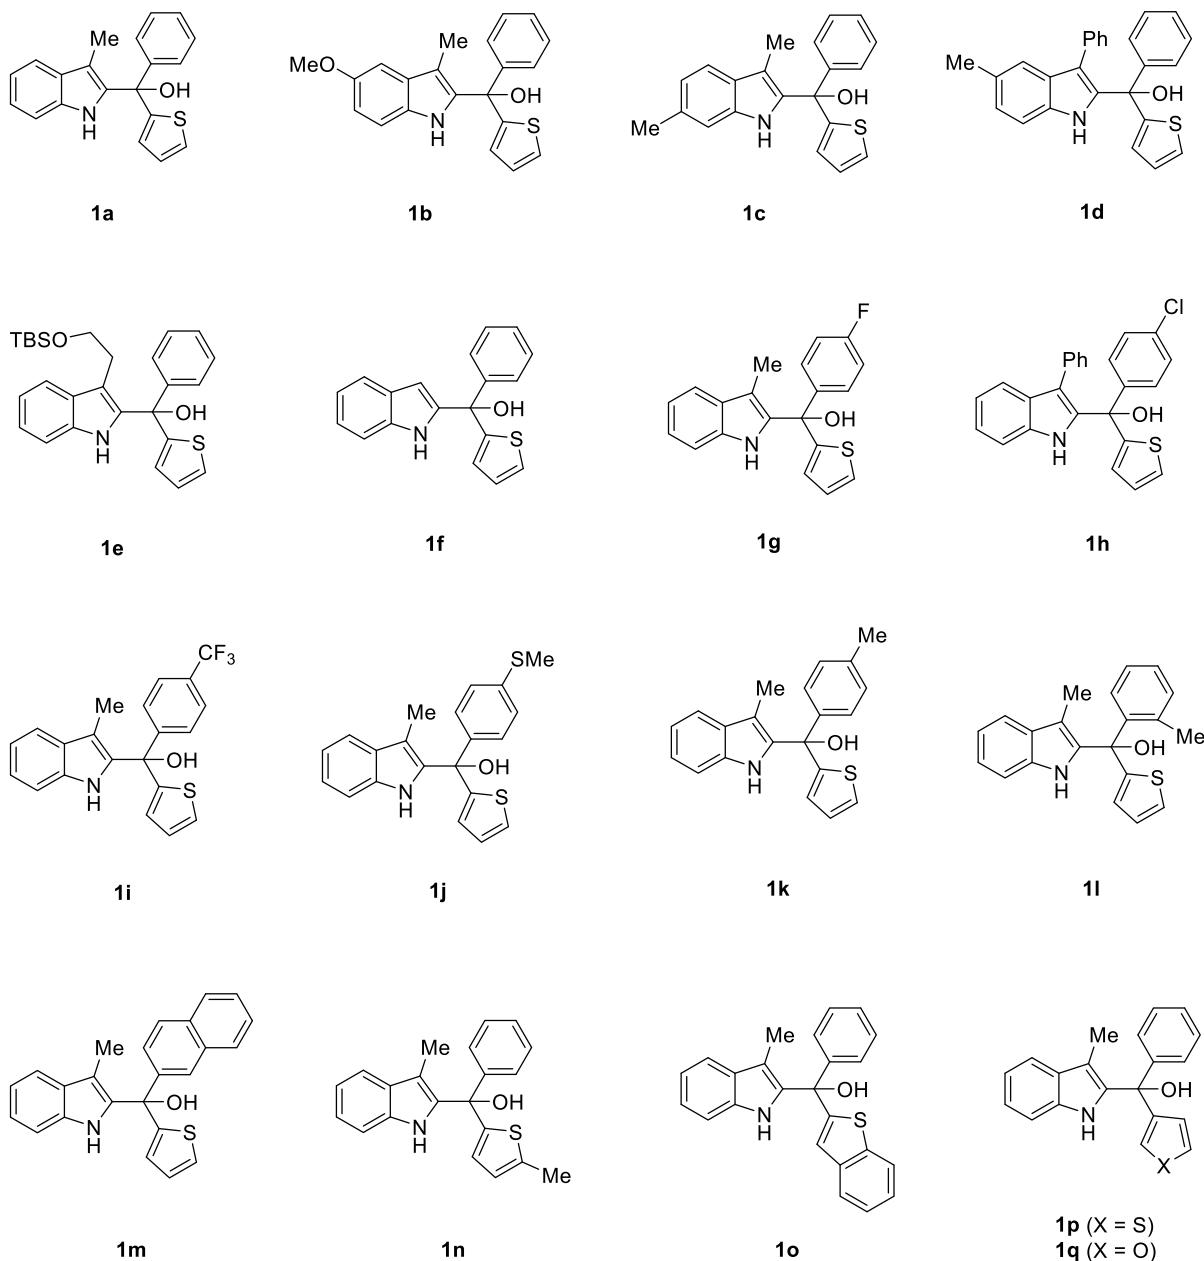

1 X. Li, M. Duan, P. Yu, K. N. Houk and J. Sun. *Nat. Commun.* 2021, **12**, 4881.

## General Procedure A.

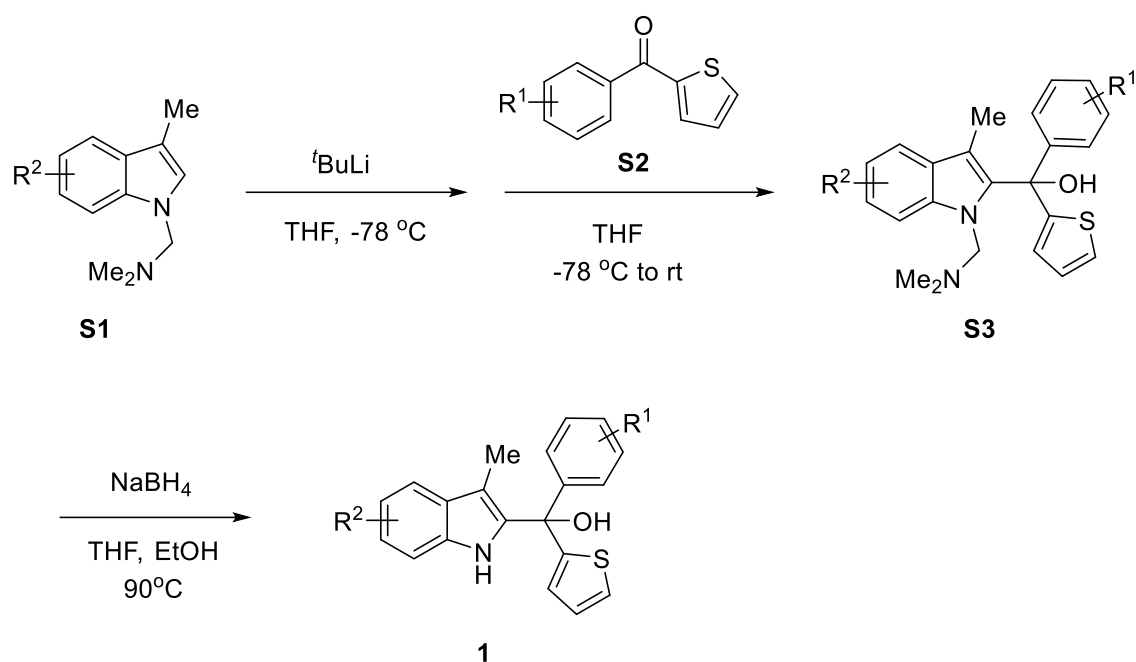

The starting indole **S1** was prepared according to the literature procedure.<sup>2</sup> At -78 °C under N<sub>2</sub>, to a stirred solution of **S1** (2.0 mmol) in THF (15 mL) was slowly added *tert*-butyllithium (1.3 M in pentane, 1.6 mL, 2.1 mmol). The resulting mixture was kept stirring at -78 °C for 0.5 h. After that, a solution of ketone **S2** (2.0 mmol) in THF (10 mL) was slowly added. The mixture was allowed to warm to room temperature and stirred overnight. Then, a saturated aqueous NH<sub>4</sub>Cl solution (30 mL) was slowly added to quench the reaction. The layers were separated, and the aqueous layer was extracted with EtOAc (3 × 30 mL). The combined organic layers were dried over anhydrous Na<sub>2</sub>SO<sub>4</sub>, filtered, and concentrated. The residue was purified by silica gel flash chromatography to afford the pure tertiary alcohol **S3**.

To a solution of alcohol **S3** in THF (3 mL) and ethanol (3 mL) was added NaBH<sub>4</sub> (83.2 mg, 2.2 mmol). The reaction mixture was heated to reflux for 16 h before it was cooled to room temperature. A saturated aqueous solution of NH<sub>4</sub>Cl (3 mL) was added to quench the reaction. Then, the mixture was concentrated under reduced pressure to remove most THF. The resulting mixture was extracted with EtOAc (3 ×

2 J. Yu, E. Lam, J. Sereda, N. Rampersad, A. Lough, C. Browning and D. Farrar, *Organometallics* 2005, **24**, 37–47.

20 mL). The combined organic layers were dried over anhydrous Na<sub>2</sub>SO<sub>4</sub>, filtered, and concentrated. The residue was purified by silica gel flash chromatography to afford the pure tertiary alcohol **1**.

### General Procedure B.

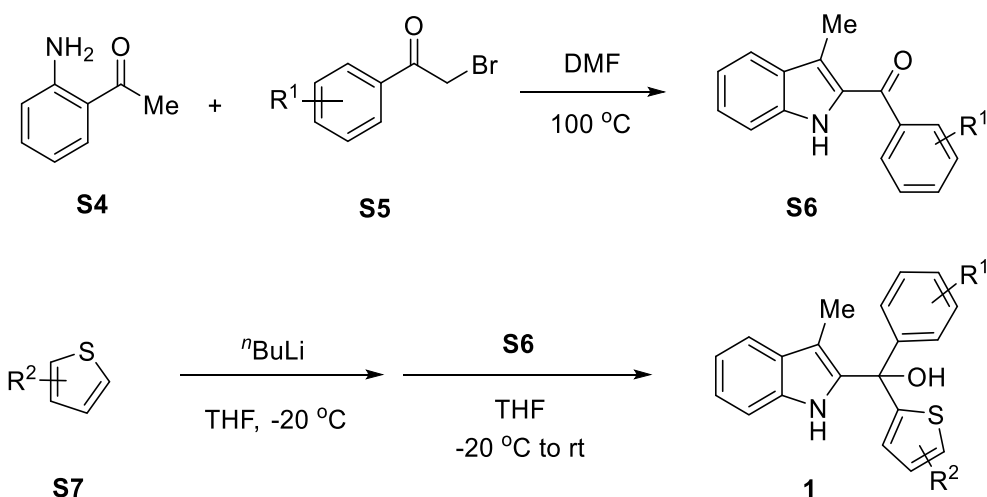

Under N<sub>2</sub> atmosphere, a suspension of *ortho*-aminoketone **S4** (1.08 g, 8 mmol), 2-bromo-1-phenylethan-1-one **S5** (8.1 mmol), and anhydrous DMF (15 mL) was stirred at 100 °C for 16 h. The mixture was cooled to room temperature before it was diluted with Et<sub>2</sub>O (30 mL) and filtered through a pad of celite, which was washed with Et<sub>2</sub>O (100 mL). The filtrate was dried over Na<sub>2</sub>SO<sub>4</sub>, filtered, and concentrated under reduced pressure. The crude product was purified by silica gel flash column chromatography to yield ketone **S6**.

At -20 °C, to a stirred solution of thiophene **S7** (9.0 mmol) in THF (15 mL) was slowly added *n*-butyllithium (2.4 M in hexane, 3.95 mL, 9.5 mmol). The resulting mixture was kept stirring at -20 °C for 1 h. After that, a solution of ketone **S6** (3.0 mmol) in THF (10 mL) was added at the same temperature and the reaction mixture was warmed up to room temperature and kept stirring overnight. A saturated aqueous NH<sub>4</sub>Cl solution (20 mL) was added to quench the reaction. The layers were separated, and the aqueous layer was extracted with EtOAc (3 × 30 mL). The combined organic

layers were dried over anhydrous  $\text{Na}_2\text{SO}_4$ , filtered, and concentrated. The residue was purified by silica gel flash chromatography to afford the pure tertiary alcohol **1**.

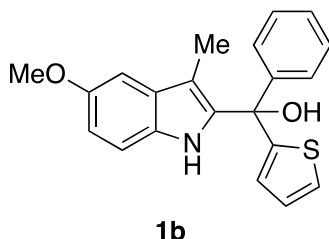

**(5-Methoxy-3-methyl-1H-indol-2-yl)(phenyl)(thiophen-2-yl)methanol (1b)** was prepared as white foam from phenyl(thiophen-2-yl)methanone (2.5 mmol) according to the General Procedure A (eluent: hexanes/EtOAc = 20:1 → 10:1) in 31% yield (2 steps, 0.27 g).

$^1\text{H NMR}$  (400 MHz, acetone- $d_6$ )  $\delta$  9.53 (s, 1H), 7.49 – 7.47 (m, 2H), 7.41 – 7.40 (m, 1H), 7.36 – 7.30 (m, 3H), 7.27 – 7.25 (m, 1H), 6.98 – 6.95 (m, 2H), 6.87 – 6.86 (m, 1H), 6.75 – 6.72 (m, 1H), 5.73 (s, 1H), 3.79 (s, 3H), 1.83 (s, 3H).

$^{13}\text{C NMR}$  (100 MHz, acetone- $d_6$ )  $\delta$  154.7, 152.6, 146.9, 140.2, 131.0, 130.7, 128.6, 128.3, 127.9, 127.1, 127.0, 126.4, 112.7, 112.5, 107.8, 100.8, 77.2, 55.8, 9.8.

**IR** (thin film) 3568, 3450, 3056, 2941, 1483, 1446, 1177, 735, 702  $\text{cm}^{-1}$ .

**HRMS** (ES-) calcd for  $\text{C}_{21}\text{H}_{18}\text{NO}_2\text{S}^-$  [M-H] $^-$ : 348.1064, found: 348.1061.

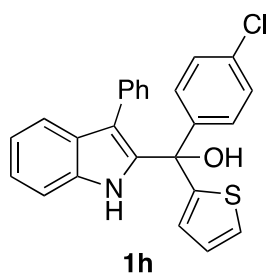

**(4-Chlorophenyl)(3-phenyl-1H-indol-2-yl)(thiophen-2-yl)methanol (1h)** was prepared as brown foam from (4-chlorophenyl)(3-phenyl-1H-indol-2-yl)methanone (3.0 mmol) according to the General Procedure B (eluent: hexanes/EtOAc = 10:1 → 5:1) in 84% yield (1.1 g).

$^1\text{H NMR}$  (400 MHz, acetone- $d_6$ )  $\delta$  10.10 (s, 1H), 7.49 – 7.47 (m, 1H), 7.42 – 7.38 (m, 2H),

7.33 – 7.29 (m, 2H), 7.21 – 7.16 (m, 3H), 7.15 – 7.10 (m, 5H), 7.05 – 7.01 (m, 1H), 6.84 – 6.80 (m, 2H), 5.85 (s, 1H).

<sup>13</sup>C NMR (100 MHz, acetone-*d*<sub>6</sub>) δ 151.8, 145.6, 138.6, 136.0, 135.6, 133.5, 131.3, 130.1, 129.9, 128.3, 128.1, 127.4, 127.1, 126.4, 126.3, 123.0, 120.3, 120.0, 116.0, 112.2, 77.2.

IR (thin film) 3542, 3440, 3055, 1488, 1450, 1263, 833, 735, 704 cm<sup>-1</sup>.

HRMS (ES-) calcd for C<sub>25</sub>H<sub>17</sub>ClNOS<sup>-</sup> [M-H]<sup>-</sup>: 414.0725, found: 414.0724.

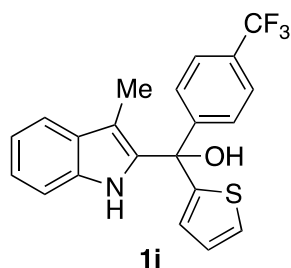

**(3-Methyl-1H-indol-2-yl)(thiophen-2-yl)(4-(trifluoromethyl)phenyl)methanol (1i)**

was prepared as dark green foam from thiophen-2-yl(4-(trifluoromethyl)phenyl)methanone (3.0 mmol) according to the General Procedure A (eluent: hexanes/EtOAc = 10:1 → 5:1) in 70% yield (2 steps, 0.81 g).

<sup>1</sup>H NMR (400 MHz, acetone-*d*<sub>6</sub>) δ 9.80 (s, 1H), 7.78 – 7.72 (m, 4H), 7.51 – 7.49 (m, 1H), 7.45 – 7.44 (m, 1H), 7.40 – 7.37 (m, 1H), 7.13 – 7.09 (m, 1H), 7.05 – 7.00 (m, 2H), 6.94 – 6.93 (m, 1H), 6.08 (s, 1H), 1.91 (s, 3H).

<sup>13</sup>C NMR (100 MHz, acetone-*d*<sub>6</sub>) δ 151.7, 151.4, 138.6, 135.8, 130.6, 129.9 (q, *J* = 32 Hz), 128.6, 127.4, 127.3, 126.8, 125.7 (q, *J* = 4 Hz), 125.3 (q, *J* = 270 Hz), 122.5, 119.5, 119.2, 112.1, 108.5, 76.9, 9.7.

<sup>19</sup>F NMR (376 MHz, acetone-*d*<sub>6</sub>) δ -62.7.

IR (thin film) 3580, 3451, 3057, 1620, 1456, 1413, 1323, 1265, 1124, 736 cm<sup>-1</sup>.

HRMS (ES-) calcd for C<sub>21</sub>H<sub>15</sub>F<sub>3</sub>NOS<sup>-</sup> [M-H]<sup>-</sup>: 386.0832, found: 386.0832.



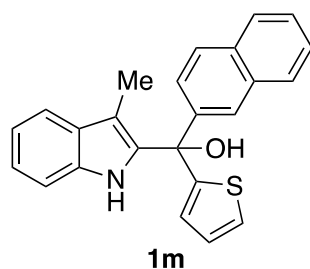

**(3-Methyl-1H-indol-2-yl)(naphthalen-2-yl)(thiophen-2-yl)methanol (1m)** was prepared as slightly yellow foam from naphthalen-2-yl(thiophen-2-yl)methanone (3 mmol) according to the General Procedure A (eluent: hexanes/EtOAc = 10:1 → 5:1) in 77% yield (2 steps, 0.85 g).

<sup>1</sup>H NMR (400 MHz, acetone-*d*<sub>6</sub>) δ 9.78 (s, 1H), 7.98 (s, 1H), 7.91 – 7.83 (m, 3H), 7.71 – 7.69 (m, 1H), 7.51 – 7.47 (m, 3H), 7.44 – 7.38 (m, 2H), 7.11 – 7.08 (m, 1H), 7.04 – 6.97 (m, 3H), 5.92 (s, 1H), 1.93 (s, 3H).

<sup>13</sup>C NMR (100 MHz, acetone-*d*<sub>6</sub>) δ 152.5, 144.4, 139.4, 135.8, 133.79, 133.76, 130.7, 129.2, 128.4, 128.3, 127.3, 127.1, 127.04, 126.99, 126.6, 126.44, 126.38, 122.3, 119.4, 119.1, 112.1, 108.2, 77.4, 9.8.

IR (thin film) 3567, 3449, 3055, 2984, 2924, 2865, 1601, 1457, 1264, 733 cm<sup>-1</sup>.

HRMS (ES<sup>-</sup>) calcd for C<sub>24</sub>H<sub>18</sub>NOS<sup>-</sup> [M-H]<sup>-</sup>: 368.1115, found: 368.1111.

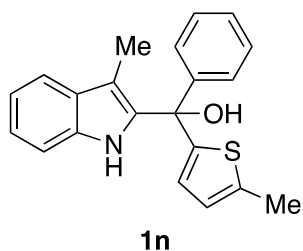

**(3-Methyl-1H-indol-2-yl)(5-methylthiophen-2-yl)(phenyl)methanol (1n)** was prepared as green foam from (5-methylthiophen-2-yl)(phenyl)methanone (3 mmol) according to the General Procedure A (eluent: hexanes/EtOAc = 10:1 → 5:1) in 75% yield (2 steps, 0.75 g).

<sup>1</sup>H NMR (400 MHz, acetone-*d*<sub>6</sub>) δ 9.67 (s, 1H), 7.51 – 7.46 (m, 3H), 7.39 – 7.27 (m, 4H), 7.09 – 7.05 (m, 1H), 7.02 – 6.98 (m, 1H), 6.64 – 6.62 (m, 2H), 5.60 (s, 1H), 2.42 (s, 3H), 1.89 (s, 3H).

$^{13}\text{C}$  NMR (100 MHz, acetone- $d_6$ )  $\delta$  150.0, 146.9, 140.6, 139.6, 135.7, 130.8, 128.6, 128.3, 128.0, 127.0, 125.3, 122.2, 119.3, 119.0, 112.0, 107.9, 77.2, 15.2, 9.7.

IR (thin film) 3446, 3055, 2921, 1705, 1622, 1451, 1264, 732, 700  $\text{cm}^{-1}$ .

HRMS (ES-) calcd for  $\text{C}_{21}\text{H}_{18}\text{NOS}^-$  [M-H] $^-$ : 332.1115, found: 332.1111.

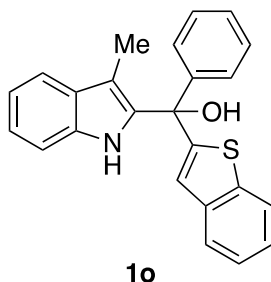

**Benzo[b]thiophen-2-yl(3-methyl-1H-indol-2-yl)(phenyl)methanol (1o)** was prepared as pale yellow foam from (3-methyl-1H-indol-2-yl)(phenyl)methanone (0.85 mmol) according to the General Procedure B (eluent: hexanes/EtOAc = 10:1  $\rightarrow$  5:1) in 50% yield (0.15 g).

$^1\text{H}$  NMR (400 MHz, acetone- $d_6$ )  $\delta$  9.84 (s, 1H), 7.87 – 7.85 (m, 1H), 7.77 – 7.74 (m, 1H), 7.60 – 7.57 (m, 2H), 7.51 – 7.49 (m, 1H), 7.40 – 7.29 (m, 6H), 7.16 (s, 1H), 7.12 – 7.08 (m, 1H), 7.05 – 7.01 (m, 1H), 5.97 (s, 1H), 1.95 (s, 3H).

$^{13}\text{C}$  NMR (100 MHz, acetone- $d_6$ )  $\delta$  153.5, 146.3, 141.0, 140.4, 138.8, 135.8, 130.7, 128.8, 128.5, 128.0, 125.1, 125.0, 124.6, 123.6, 123.0, 122.3, 119.5, 119.1, 112.1, 108.4, 77.6, 9.8.

IR (thin film) 3577, 3452, 3056, 2927, 2866, 1490, 998, 1264, 732  $\text{cm}^{-1}$ .

HRMS (ES-) calcd for  $\text{C}_{24}\text{H}_{18}\text{NOS}^-$  [M-H] $^-$ : 368.1115, found: 368.1113.

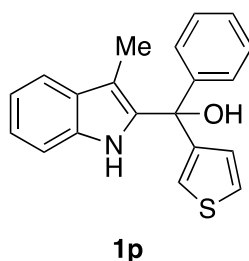

**(3-Methyl-1H-indol-2-yl)(phenyl)(thiophen-3-yl)methanol (1p)** was prepared as orange foam according to the General Procedure B. At  $-78\text{ }^\circ\text{C}$ , to a stirred solution of

3-bromothiophene (6 mmol) in THF (10 mL) was slowly added *n*-butyllithium (2.4 M in hexane, 2.6 mL, 6.26 mmol). The resulting mixture was kept stirring at  $-78\text{ }^{\circ}\text{C}$  for 30 min. After that, a solution of (3-methyl-1*H*-indol-2-yl)(phenyl)methanone (2 mmol) in THF (5 mL) was added at the same temperature and the reaction mixture was warmed up to room temperature and kept stirring overnight. A saturated aqueous  $\text{NH}_4\text{Cl}$  solution (20 mL) was added to quench the reaction. The layers were separated, and the aqueous layer was extracted with EtOAc ( $3 \times 30\text{ mL}$ ). The combined organic layers were dried over anhydrous  $\text{Na}_2\text{SO}_4$ , filtered, and concentrated. The residue was purified by silica gel flash chromatography (eluent: hexanes/EtOAc = 10:1  $\rightarrow$  8:1) to afford the pure tertiary alcohol **1p** in 86% yield (0.55 g).

$^1\text{H NMR}$  (400 MHz, acetone- $d_6$ )  $\delta$  9.66 (s, 1H), 7.52 – 7.48 (m, 3H), 7.44 – 7.40 (m, 2H), 7.37 – 7.28 (m, 3H), 7.20 – 7.18 (m, 1H), 7.13 – 7.02 (m, 3H), 5.50 (s, 1H), 1.89 (s, 3H).

$^{13}\text{C NMR}$  (100 MHz, acetone- $d_6$ )  $\delta$  148.9, 146.9, 139.5, 135.6, 130.7, 128.8, 128.6, 128.04, 127.95, 126.4, 123.8, 122.0, 119.3, 118.9, 111.9, 107.5, 77.0, 9.5.

**IR** (thin film) 3440, 3057, 2975, 2866, 1591, 1488, 1453, 1327, 1142, 788, 743, 701  $\text{cm}^{-1}$ .

**HRMS** (ES-) calcd for:  $\text{C}_{20}\text{H}_{16}\text{NOS}^-$  [ $\text{M}-\text{H}$ ] $^-$ : 318.0958, found: 318.0957.

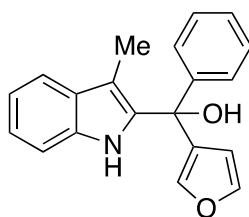

**1q**

**Furan-3-yl(3-methyl-1*H*-indol-2-yl)(phenyl)methanol (1q)** was prepared as orange foam according to the General Procedure B. At  $-78\text{ }^{\circ}\text{C}$ , to a stirred solution of 3-bromofuran (2.25 mmol, 330.8 mg) in THF (5 mL) was slowly added *n*-butyllithium (2.4 M in hexane, 0.94 mL, 2.25 mmol). The resulting mixture was kept stirring at  $-78\text{ }^{\circ}\text{C}$  for 30 min. After that, a solution of (3-methyl-1*H*-indol-2-yl)(phenyl)methanone (0.75 mmol, 176.3 mg) in THF (3 mL) was added at the same temperature and the reaction mixture was warmed up to room temperature and kept stirring overnight. A

saturated aqueous  $\text{NH}_4\text{Cl}$  solution (10 mL) was added to quench the reaction. The layers were separated, and the aqueous layer was extracted with EtOAc ( $3 \times 15$  mL). The combined organic layers were dried over anhydrous  $\text{Na}_2\text{SO}_4$ , filtered, and concentrated. The residue was purified by silica gel flash chromatography (eluent: hexanes/EtOAc = 10:1  $\rightarrow$  8:1) to afford the pure tertiary alcohol **1p** in 46% yield (0.107 g).

$^1\text{H NMR}$  (400 MHz, acetone- $d_6$ )  $\delta$  9.70 (s, 1H), 7.57 – 7.48 (m, 3H), 7.41– 7.39 (m, 2H), 7.36 – 7.27 (m, 3H), 7.190 – 7.189 (m, 1H), 7.12 – 7.08 (m, 1H), 7.05 – 7.01 (m, 1H), 6.559 – 6.555 (m, 1H), 5.39 (s, 1H), 1.96 (s, 3H).

$^{13}\text{C NMR}$  (100 MHz, acetone- $d_6$ )  $\delta$  146.6, 144.2, 141.7, 139.2, 135.6, 133.1, 130.8, 128.6, 128.1, 127.7, 122.0, 119.3, 118.9, 111.9, 111.5, 107.2, 74.4, 9.7.

**IR** (thin film) 3372, 2979, 2939, 2867, 1451, 1382, 1118, 1030, 740, 703  $\text{cm}^{-1}$ .

**HRMS** (ES-) calcd for:  $\text{C}_{20}\text{H}_{16}\text{NO}_2^-$   $[\text{M}-\text{H}]^-$ : 302.1187, found: 302.1176.

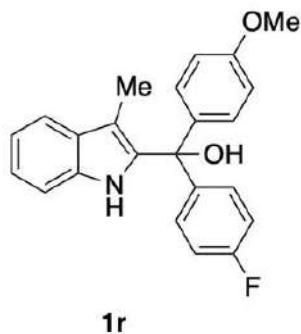

**(4-Fluorophenyl)(4-methoxyphenyl)(3-methyl-1H-indol-2-yl)methanol (1r)** was prepared as orange foam from (4-fluorophenyl)(3-methyl-1H-indol-2-yl)methanone according to General Procedure B (eluent: hexanes/EtOAc = 10:1 → 5:1) in 70% yield (0.10 g).

**<sup>1</sup>H NMR** (400 MHz, acetone-*d*<sub>6</sub>) δ 9.62 (s, 1H), 7.48–7.42 (m, 3H), 7.37 – 7.36 (m, 1H), 7.30 – 7.29 (m, 2H), 7.12 – 7.05 (m, 3H), 7.03 – 6.99 (m, 1H), 6.91 – 6.88 (m, 2H), 5.50 (br, 1H), 3.78 (s, 3H), 1.83 (s, 3H).

**<sup>13</sup>C NMR** (100 MHz, acetone-*d*<sub>6</sub>) δ 162.3 (d, *J* = 243 Hz), 159.4, 143.1 (d, *J* = 3 Hz), 139.4, 138.6, 135.3, 130.2, 130.1 (d, *J* = 8 Hz), 129.3, 121.6, 118.9, 118.4, 114.7 (d, *J* = 21 Hz), 113.5, 111.5, 107.5, 78.2, 55.0, 9.4.

**<sup>19</sup>F NMR** (376 MHz, acetone-*d*<sub>6</sub>) δ -117.5.

**IR** (thin film) 3453, 3053, 2924, 2847, 1603, 1505, 1456, 1240, 1168, 1027, 832, 738 cm<sup>-1</sup>.

**HRMS** (ES-) calcd for C<sub>23</sub>H<sub>19</sub>FNO<sub>2</sub><sup>-</sup> [M-H]<sup>-</sup>: 360.1405, found: 360.1405.

### III. Catalytic Asymmetric Synthesis of Triarylmethanes

#### General Procedure C.

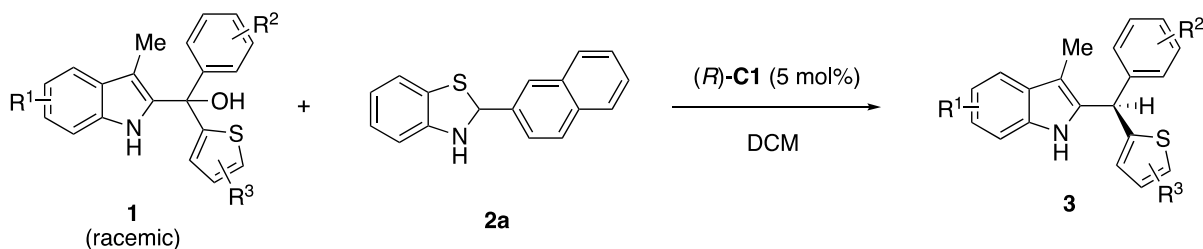

At 0 °C, to an oven-dried 30-mL vial were added the tertiary alcohol **1** (0.40 mmol), the hydride source **2a** (115.9 mg, 0.44 mmol), (*R*)-**C1** (15.04 mg, 0.02 mmol, 5.0 mol%) and DCM (8.0 mL). The mixture was stirred at the same temperature for 30 h and concentrated under reduced pressure. The residue was purified by silica gel flash chromatography to afford the desired product.

Unless noted otherwise, all the racemic products (used for HPLC reference in determining the ee value) were prepared from the same reaction using racemic 1,1'-binaphthyl-2,2'-diyl hydrogenphosphate as the catalyst.

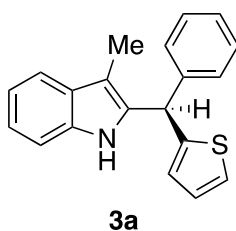

(*R*)-3-Methyl-2-(phenyl(thiophen-2-yl)methyl)-1*H*-indole (**3a**) was prepared as pale yellow foam from (3-methyl-1*H*-indol-2-yl)(phenyl)(thiophen-2-yl)methanol **1a** (79.8 mg, 0.250 mmol) and **2a** (72.4 mg, 0.275 mmol) according to the General Procedure C (RT, 16 h, eluent: hexanes/dichloromethane = 3:2) in 87% yield (66.3 mg, 96% ee).

$[\alpha]_D^{26}$ : -10.8 ( $c = 0.5$ , CH<sub>2</sub>Cl<sub>2</sub>). HPLC analysis of the product: Daicel CHIRALPAK AD-H column; 5% *i*-PrOH in hexanes; 1.0 mL/min; retention times: 8.4 min (major), 9.3 min (minor).

<sup>1</sup>H NMR (400 MHz, acetone-*d*<sub>6</sub>)  $\delta$  9.70 (s, 1H), 7.48 – 7.47 (m, 1H), 7.37 – 7.24 (m, 7H),

7.06 – 6.96 (m, 3H), 6.81 – 6.80 (m, 1H), 6.05 (s, 1H), 2.23 (s, 3H).

<sup>13</sup>C NMR (100 MHz, acetone-*d*<sub>6</sub>) δ 147.1, 143.5, 136.9, 136.5, 130.0, 129.3 (2C), 127.7, 127.5, 127.1, 125.6, 121.9, 119.5, 118.9, 111.8, 107.8, 44.7, 8.8.

IR (thin film) 3441, 3058, 2923, 2858, 1492, 1456, 742, 701 cm<sup>-1</sup>.

HRMS (ES-) calcd for C<sub>20</sub>H<sub>16</sub>NS<sup>-</sup> [M-H]<sup>-</sup>: 302.1009, found: 302.1001.

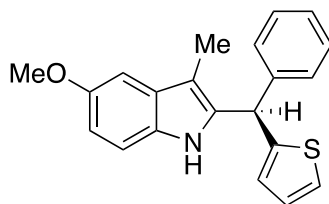

**3b**

**(R)-5-Methoxy-3-methyl-2-(phenyl(thiophen-2-yl)methyl)-1H-indole (3b)** was prepared as white foam from (5-methoxy-3-methyl-1H-indol-2-yl)(phenyl)(thiophen-2-yl)methanol **1b** (139.8 mg, 0.400 mmol) and **2a** (106.4 mg, 0.404 mmol) according to the General Procedure C (0 °C, 30 h, eluent: hexanes/dichloromethane = 1:1) in 76% yield (90.7 mg, 96% ee).

[α]<sub>D</sub><sup>26</sup>: -15.0 (*c* = 0.5, CH<sub>2</sub>Cl<sub>2</sub>). HPLC analysis of the product: Daicel CHIRALPAK AD-H column; 5% *i*-PrOH in hexanes; 1.0 mL/min; retention times: 12.6 min (major), 15.1 min (minor).

<sup>1</sup>H NMR (400 MHz, acetone-*d*<sub>6</sub>) δ 9.50 (s, 1H), 7.37–7.31 (m, 5H), 7.27 – 7.22 (m, 2H), 7.01 – 6.96 (m, 2H), 6.82 – 6.81 (m, 1H), 6.75 – 6.72 (m, 1H), 6.03 (s, 1H), 3.80 (s, 3H), 2.22 (s, 3H).

<sup>13</sup>C NMR (100 MHz, acetone-*d*<sub>6</sub>) δ 154.7, 147.1, 143.4, 137.2, 131.9, 130.4, 129.3, 129.3, 127.7, 127.5, 127.0, 125.6, 112.5, 112.0, 107.7, 100.9, 55.9, 44.8, 8.9.

IR (thin film) 3448, 3052, 2926, 1590, 1482, 1449, 1264, 1215, 1174, 1100, 1030, 735, 703 cm<sup>-1</sup>.

HRMS (ES-) calcd for C<sub>21</sub>H<sub>18</sub>NOS<sup>-</sup> [M-H]<sup>-</sup>: 332.1115, found: 332.1110.

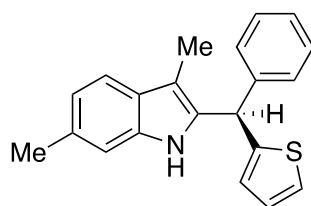

**3c**

**(R)-3,5-Dimethyl-2-(phenyl(thiophen-2-yl)methyl)-1H-indole (3c)** was prepared as white foam from (3,5-dimethyl-1H-indol-2-yl)(phenyl)(thiophen-2-yl)methanol (116.6 mg, 0.349 mmol) **1c** and **2a** (101.1 mg, 0.384 mmol) according to the General Procedure C (0°C, 30 h, eluent: hexanes/dichloromethane = 1:1) in 73% yield (80.0 mg, 94% ee).  $[\alpha]_D^{26}$ : -18.1 ( $c = 0.5$ , CH<sub>2</sub>Cl<sub>2</sub>). HPLC analysis of the product: Daicel CHIRALPAK AD-H column; 3% *i*-PrOH in hexanes; 1.0 mL/min; retention times: 13.7 min (major), 17.1 min (minor).

<sup>1</sup>H NMR (400 MHz, acetone-*d*<sub>6</sub>)  $\delta$  9.52 (s, 1H), 7.37 – 7.30 (m, 6H), 7.26 – 7.23 (m, 1H), 7.11 (s, 1H), 6.98 – 6.95 (m, 1H), 6.86 – 6.84 (m, 1H), 6.80 – 6.79 (m, 1H), 6.02 (s, 1H), 2.37 (s, 3H), 2.21 (s, 3H).

<sup>13</sup>C NMR (100 MHz, acetone-*d*<sub>6</sub>)  $\delta$  147.2, 143.5, 137.3, 135.7, 131.2, 129.3 (2C), 128.0, 127.6, 127.5, 127.0, 125.5, 121.1, 118.7, 111.8, 107.6, 44.7, 21.8, 8.8

IR (thin film) 3449, 3033, 2922, 2860, 1455, 1332, 1264, 1226, 850, 804, 734, 701 cm<sup>-1</sup>.

HRMS (ES<sup>-</sup>) calcd for C<sub>21</sub>H<sub>18</sub>NS<sup>-</sup> [M-H]<sup>-</sup>: 316.1165, found: 316.1166.

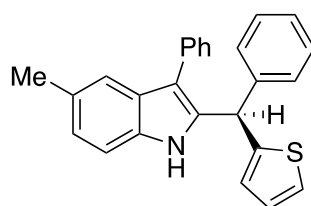

**3d**

**(R)-5-Methyl-3-phenyl-2-(phenyl(thiophen-2-yl)methyl)-1H-indole (3d)** was prepared as bright orange foam from (5-methyl-3-phenyl-1H-indol-2-yl)(phenyl)(thiophen-2-yl)methanol **1d** (158.2 mg, 0.400 mmol) and **2a** (115.9 mg, 0.440 mmol) according to the General Procedure C (0 °C, 30 h, eluent: hexanes/dichloromethane = 1:1) in 82% yield (123.6 mg, 92% ee).



$[\alpha]_{\text{D}}^{26}$ : +5.5 ( $c = 0.5$ ,  $\text{CH}_2\text{Cl}_2$ ). HPLC analysis of the product: Daicel CHIRALPAK AD-H column; 3% *i*-PrOH in hexanes; 1.0 mL/min; retention times: 9.4 min (major), 11.7 min (minor).

$^1\text{H NMR}$  (400 MHz, acetone- $d_6$ )  $\delta$  10.03 (s, 1H), 7.52 – 7.50 (m, 2H), 7.47 – 7.43 (m, 3H), 7.33 – 7.30 (m, 7H), 7.26 – 7.23 (m, 1H), 7.00 – 6.95 (m, 2H), 6.84 – 6.83 (m, 1H), 6.06 (s, 1H), 2.39 (s, 3H).

$^{13}\text{C NMR}$  (100 MHz, acetone- $d_6$ )  $\delta$  147.1, 143.5, 136.7, 136.2, 135.6, 130.4, 129.4, 129.4 (2C), 129.2, 128.5, 127.8, 127.6, 127.3, 127.0, 125.7, 124.2, 119.3, 115.2, 112.0, 44.5, 21.7.

IR (thin film) 3439, 3058, 3028, 2923, 2858, 1601, 1486, 1443, 1303, 1230, 738, 701  $\text{cm}^{-1}$ .

HRMS (ES-) calcd for  $\text{C}_{26}\text{H}_{20}\text{NS}^-$   $[\text{M}-\text{H}]^-$ : 378.1322, found: 378.1317.

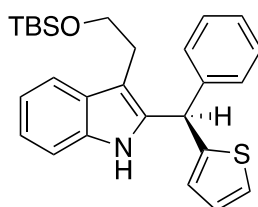

**3e**

**(R)-3-(2-((*Tert*-butyldimethylsilyl)oxy)ethyl)-2-(phenyl(thiophen-2-yl)methyl)-1H-indole (3e)** was prepared as yellow oil from (3-(2-((*tert*-butyldimethylsilyl)oxy)ethyl)-1H-indol-2-yl)(phenyl)(thiophen-2-yl)methanol **1e** (123.0 mg, 0.265 mmol) and **2a** (76.2 mg, 0.289 mmol) according to the General Procedure C (0 °C, 72 h, eluent: hexanes/dichloromethane = 1:1) in 70% yield (79.5 mg, 90% ee).

$[\alpha]_{\text{D}}^{26}$ : -5.5 ( $c = 0.5$ ,  $\text{CH}_2\text{Cl}_2$ ). HPLC analysis of the product: Daicel CHIRALCEL OD-H column; 2% *i*-PrOH in hexanes; 0.5 mL/min; retention times: 13.0 min (major), 14.3 min (minor).

$^1\text{H NMR}$  (400 MHz, acetone- $d_6$ )  $\delta$  9.76 (s, 1H), 7.57 – 7.55 (m, 1H), 7.38 – 7.31 (m, 6H), 7.28 – 7.24 (m, 1H), 7.07 – 6.96 (m, 3H), 6.83 – 6.81 (m, 1H), 6.12 (s, 1H), 3.77 – 3.67 (m, 2H), 3.05 – 3.01 (m, 2H), 0.88 (s, 9H), 0.00 (s, 6H).

$^{13}\text{C NMR}$  (100 MHz, acetone- $d_6$ )  $\delta$  147.0, 143.6, 137.2, 137.0, 129.5, 129.3, 129.3, 127.8, 127.5, 127.2, 125.6, 121.9, 119.6, 119.2, 112.0, 109.4, 64.5, 44.4, 29.0, 26.4, 18.9, -5.1.

IR (thin film) 3447, 3056, 2936, 2859, 1600, 1457, 1342, 1259, 1087, 837, 735, 701  $\text{cm}^{-1}$ .

HRMS (ES+) calcd for  $\text{C}_{27}\text{H}_{33}\text{NONaSi}^+$   $[\text{M}+\text{Na}]^+$ : 470.1944, found: 470.1949.

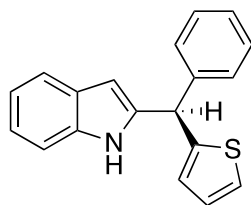

**3f**

**(R)-2-(Phenyl(thiophen-2-yl)methyl)-1H-indole (3f)** was prepared as white foam from (1H-indol-2-yl)(phenyl)(thiophen-2-yl)methanol **1f** (152.7 mg, 0.500 mmol) and **2a** (145.2 mg, 0.550 mmol) according to the General Procedure C (0 °C, 36 h, eluent: hexanes/ethyl acetate = 20:1) in 78% yield (112.0 mg, 89% ee).

$[\alpha]_{\text{D}}^{26}$ : -22.6 ( $c = 0.5$ ,  $\text{CH}_2\text{Cl}_2$ ). HPLC analysis of the product: Daicel CHIRALPAK AD-H column; 3% *i*-PrOH in hexanes; 1.0 mL/min; retention times: 22.8 min (major), 24.6 min (minor).

$^1\text{H NMR}$  (400 MHz, acetone- $d_6$ )  $\delta$  10.13 (s, 1H), 7.50 – 7.48 (m, 1H), 7.38 – 7.33 (m, 6H), 7.29 – 7.25 (m, 1H), 7.08 – 7.04 (m, 1H), 7.01 – 6.97 (m, 2H), 6.89 – 6.88 (m, 1H), 6.182 – 6.178 (m, 1H), 5.93 (s, 1H).

$^{13}\text{C NMR}$  (100 MHz, acetone- $d_6$ )  $\delta$  147.2, 143.7, 142.0, 137.8, 129.3, 129.3, 129.1, 127.8, 127.4, 126.9, 125.5, 122.0, 120.8, 120.0, 111.8, 102.1, 46.9.

IR (thin film) 3402, 3054, 2924, 2857, 1593, 1542, 1493, 1453, 1342, 1112, 737, 700  $\text{cm}^{-1}$ .

HRMS (ES-) calcd for  $\text{C}_{19}\text{H}_{14}\text{NS}^-$   $[\text{M}-\text{H}]^-$ : 288.0852, found: 288.0851.

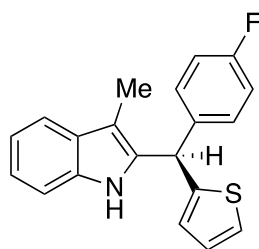

**3g**

**(R)-2-((4-Fluorophenyl)(thiophen-2-yl)methyl)-3-methyl-1H-indole (3g)** was

prepared as white foam from (4-fluorophenyl)(3-methyl-1*H*-indol-2-yl)(thiophen-2-yl)methanol **1g** (134.2 mg, 0.398 mmol) and **2a** (115.0 mg, 0.438 mmol) according to the General Procedure C (0°C, 48 h, eluent: hexanes/dichloromethane = 3:2) in 90% yield (112.4 mg, 89% ee).

$[\alpha]_{\text{D}}^{26}$ : -19.6 ( $c = 0.5$ , CH<sub>2</sub>Cl<sub>2</sub>). HPLC analysis of the product: Daicel CHIRALPAK AD-H column; 3% *i*-PrOH in hexanes; 1.0 mL/min; retention times: 12.5 min (major), 13.8 min (minor).

<sup>1</sup>H NMR (400 MHz, acetone-*d*<sub>6</sub>)  $\delta$  9.71 (s, 1H), 7.52–7.50 (m, 1H), 7.40 – 7.31 (m, 4H), 7.13 – 6.97 (m, 5H), 6.83 – 6.82 (m, 1H), 6.09 (s, 1H), 2.25 (s, 3H).

<sup>13</sup>C NMR (100 MHz, acetone-*d*<sub>6</sub>)  $\delta$  162.6 (d,  $J = 242$  Hz), 146.9, 139.51 (d,  $J = 3$  Hz), 136.9, 136.2, 131.1 (d,  $J = 8$  Hz), 130.0, 127.6, 127.1, 125.7, 122.0, 119.5, 119.0, 115.9 (d,  $J = 22$  Hz), 111.8, 108.0, 43.9, 8.8.

<sup>19</sup>F NMR (376 MHz, acetone-*d*<sub>6</sub>)  $\delta$  -117.3.

IR (thin film) 3449, 3054, 2923, 2858, 1602, 1505, 1457, 1308, 1264, 1225, 1157, 1100, 1014, 736, 700 cm<sup>-1</sup>.

HRMS (ES-) calcd for C<sub>20</sub>H<sub>15</sub>FNS<sup>-</sup> [M-H]<sup>-</sup>: 320.0915, found: 320.0910.

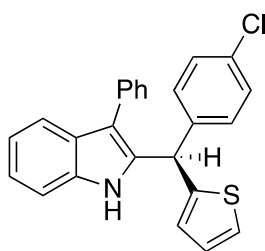

**3h**

**(*R*)-2-((4-Chlorophenyl)(thiophen-2-yl)methyl)-3-phenyl-1*H*-indole (3h)** was prepared as white foam from (4-chlorophenyl)(3-phenyl-1*H*-indol-2-yl)(thiophen-2-yl)methanol **1h** (141.1 mg, 0.339 mmol) and **2a** (98.3 mg, 0.373 mmol) according to the General Procedure C (-20°C, 48 h, eluent: hexanes/dichloromethane = 3:2) in 85% yield (115.4 mg, 93% ee).

$[\alpha]_{\text{D}}^{26}$ : +15.1 ( $c = 0.5$ , CH<sub>2</sub>Cl<sub>2</sub>). HPLC analysis of the product: Daicel CHIRALPAK AD-H column; 5% *i*-PrOH in hexanes; 1.0 mL/min; retention times: 8.2 min (major), 7.5

min (minor).

$^1\text{H NMR}$  (400 MHz, acetone- $d_6$ )  $\delta$  10.20 (s, 1H), 7.60 – 7.58 (m, 1H), 7.49 – 7.40 (m, 5H), 7.38 – 7.29 (m, 6H), 7.16 – 7.12 (m, 1H), 7.08 – 7.05 (m, 1H), 7.00 – 6.98 (m, 1H), 6.86 – 6.85 (m, 1H), 6.07 (s, 1H).

$^{13}\text{C NMR}$  (100 MHz, acetone- $d_6$ )  $\delta$  146.4, 142.3, 137.3, 136.1, 135.8, 133.2, 131.0, 130.4, 129.5, 129.4, 128.2, 127.8, 127.5, 127.2, 126.0, 122.8, 120.6, 119.7, 115.9, 112.3, 43.9.

**IR** (thin film) 3437, 3053, 2925, 2855, 1603, 1489, 1448, 1323, 1180, 1090, 1030, 736, 700  $\text{cm}^{-1}$ .

**HRMS** (ES-) calcd for  $\text{C}_{25}\text{H}_{17}\text{ClNS}^-$  [ $\text{M}-\text{H}$ ] $^-$ : 398.0776, found: 398.0772.

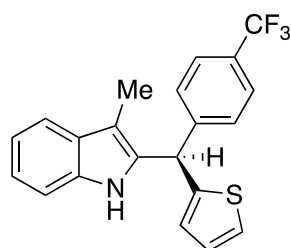

**3i**

**(R)-3-Methyl-2-(thiophen-2-yl(4-(trifluoromethyl)phenyl)methyl)-1H-indole (3i)**

was prepared as pale blue foam from (3-methyl-1H-indol-2-yl)(thiophen-2-yl)(4-(trifluoromethyl)phenyl)methanol **1i** (68 mg, 0.175 mmol) and **2a** (50.7 mg, 0.193 mmol) according to the General Procedure C (0°C, 72 h, eluent: hexanes/dichloromethane = 3:2) in 48% yield (31.0 mg, 91% ee).

$[\alpha]_{\text{D}}^{26}$ : -23.7 ( $c = 0.5$ ,  $\text{CH}_2\text{Cl}_2$ ). HPLC analysis of the product: Daicel CHIRALCEL OD-H column; 3% *i*-PrOH in hexanes; 1.0 mL/min; retention times: 12.6 min (major), 14.5 min (minor).

$^1\text{H NMR}$  (400 MHz, acetone- $d_6$ )  $\delta$  9.79 (s, 1H), 7.71– 7.69 (m, 2H), 7.58 – 7.56 (m, 2H), 7.51 – 7.49 (m, 1H), 7.40 – 7.39 (m, 1H), 7.31 – 7.29 (m, 1H), 7.08 – 7.00 (m, 3H), 6.87 – 6.86 (m, 1H), 6.21 (s, 1H), 2.25 (s, 3H).

$^{13}\text{C NMR}$  (100 MHz, acetone- $d_6$ )  $\delta$  148.1, 145.9, 137.0, 135.5, 130.1, 130.0, 129.4 (q,  $J = 32$  Hz), 127.7, 126.3 (q,  $J = 4$  Hz), 125.4 (q,  $J = 269$  Hz), 126.0, 124.0, 122.2, 119.6, 119.1, 111.9, 108.4, 44.4, 8.7.

$^{19}\text{F}$  NMR (376 MHz, acetone- $d_6$ )  $\delta$  -62.8.

IR (thin film) 3448, 3055, 2924, 2860, 1673, 1618, 1458, 1418, 1322, 1264, 1164, 1119, 1066, 1017, 738, 703  $\text{cm}^{-1}$ .

HRMS (ES-) calcd for  $\text{C}_{21}\text{H}_{15}\text{F}_3\text{NS}^-$  [M-H] $^-$ : 370.0883, found: 370.0880.

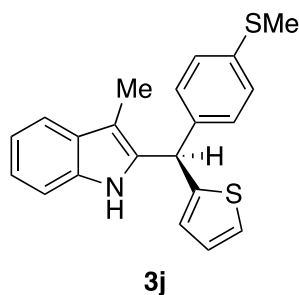

**(R)-3-Methyl-2-((4-(methylthio)phenyl)(thiophen-2-yl)methyl)-1H-indole (3j)** was prepared as white foam from (3-methyl-1H-indol-2-yl)(4-(methylthio)phenyl)(thiophen-2-yl)methanol **1j** (146.2 mg, 0.400 mmol) and **2a** (115.9 mg, 0.440 mmol) according to the General Procedure C ( $-30^\circ\text{C}$ , 144 h, eluent: hexanes/ethyl acetate = 20:1) in 77% yield (107.1 mg, 88% ee).

$[\alpha]_{\text{D}}^{26}$ :  $-15.5$  ( $c = 0.5$ ,  $\text{CH}_2\text{Cl}_2$ ). HPLC analysis of the product: Daicel CHIRALCEL OD-H column; 10% *i*-PrOH in hexanes; 1.0 mL/min; retention times: 8.5 min (major), 9.5 min (minor).

$^1\text{H}$  NMR (400 MHz, acetone- $d_6$ )  $\delta$  9.70 (s, 1H), 7.49 – 7.48 (m, 1H), 7.34 – 7.28 (m, 4H), 7.24 – 7.22 (m, 2H), 7.07 – 6.96 (m, 3H), 6.82 – 6.81 (m, 1H), 6.02 (s, 1H), 2.45 (s, 3H), 2.24 (s, 3H).

$^{13}\text{C}$  NMR (100 MHz, acetone- $d_6$ )  $\delta$  146.9, 140.1, 138.0, 136.9, 136.3, 130.0, 129.8, 127.5, 127.1, 127.0, 125.6, 121.9, 119.5, 118.9, 111.8, 107.8, 44.1, 15.4, 8.8.

IR (thin film) 3442, 3050, 2920, 2923, 2857, 1676, 1596, 1490, 1452, 1317, 1264, 1093, 962, 820, 735, 698  $\text{cm}^{-1}$ .

HRMS (ES-) calcd for  $\text{C}_{21}\text{H}_{18}\text{NS}_2^-$  [M-H] $^-$ : 348.0886, found: 348.0878.

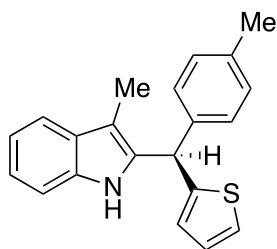

**3k**

**(R)-3-Methyl-2-(thiophen-2-yl(*p*-tolyl)methyl)-1H-indole (3k)** was prepared as white foam from (3-methyl-1H-indol-2-yl)(thiophen-2-yl)(*p*-tolyl)methanol **1k** (92.0 mg, 0.276 mmol) and **2a** (79.9 mg, 0.303 mmol) according to the General Procedure C (0 °C, 30 h, eluent: hexanes/dichloromethane = 3:2) in 89% yield (78.0 mg, 95% ee).

$[\alpha]_D^{26}$ : -14.5 ( $c = 0.5$ , CH<sub>2</sub>Cl<sub>2</sub>). HPLC analysis of the product: Daicel CHIRALPAK AD-H column; 2% *i*-PrOH in hexanes; 1.0 mL/min; retention times: 11.8 min (major), 10.8 min (minor).

<sup>1</sup>H NMR (400 MHz, acetone-*d*<sub>6</sub>)  $\delta$  9.64 (s, 1H), 7.51 – 7.49 (m, 1H), 7.33 – 7.31 (m, 2H), 7.27 – 7.25 (m, 2H), 7.16 – 7.14 (m, 2H), 7.08 – 7.00 (m, 2H), 6.97 – 6.95 (m, 1H), 6.82 – 6.81 (m, 1H), 6.02 (s, 1H), 2.31 (s, 3H), 2.25 (s, 3H).

<sup>13</sup>C NMR (100 MHz, acetone-*d*<sub>6</sub>)  $\delta$  147.3, 140.4, 137.1, 136.8, 136.6, 129.9, 129.2, 127.5, 127.3, 126.9, 125.5, 121.8, 119.4, 118.9, 111.8, 107.7, 44.3, 21.0, 8.8.

IR (thin film) 3449, 3051, 2924, 2862, 1510, 1601, 1458, 1335, 1104, 1033, 744, 704 cm<sup>-1</sup>.

HRMS (ES<sup>-</sup>) calcd for C<sub>21</sub>H<sub>18</sub>NS<sup>-</sup> [M-H]<sup>-</sup>: 316.1165, found: 316.1161.

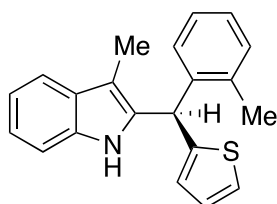

**3l**

**(R)-3-Methyl-2-(thiophen-2-yl(*o*-tolyl)methyl)-1H-indole (3l)** was prepared as white foam from (3-methyl-1H-indol-2-yl)(thiophen-2-yl)(*o*-tolyl)methanol **1l** (133.4 mg, 0.400 mmol) and **2a** (115.9 mg, 0.440 mmol) according to the General Procedure C (-20 °C, 72 h, eluent: hexanes/dichloromethane = 3:2) in 83% yield (105.0 mg, 91% ee).

$[\alpha]_{\text{D}}^{26}$ :  $-15.8$  ( $c = 0.5$ ,  $\text{CH}_2\text{Cl}_2$ ). HPLC analysis of the product: Daicel CHIRALPAK AD-H column; 1% *i*-PrOH in hexanes; 1.0 mL/min; retention times: 10.1 min (major), 10.7 min (minor).

$^1\text{H NMR}$  (400 MHz, acetone- $d_6$ )  $\delta$  9.53 (s, 1H), 7.52 – 7.50 (m, 1H), 7.35 – 7.30 (m, 2H), 7.21 – 7.14 (m, 4H), 7.08 – 7.01 (m, 2H), 6.98 – 6.96 (m, 1H), 6.75 – 6.74 (m, 1H), 6.18 (s, 1H), 2.31 (s, 3H), 2.19 (s, 3H).

$^{13}\text{C NMR}$  (100 MHz, acetone- $d_6$ )  $\delta$  146.6, 141.7, 136.9, 136.7, 135.9, 131.2, 130.1, 128.9, 127.8, 127.5, 127.2, 126.9, 125.6, 121.8, 119.5, 118.8, 111.8, 107.8, 41.6, 19.5, 8.7.

IR (thin film) 3446, 3054, 2921, 2860, 1676, 1601, 1458, 1382, 1100, 1037, 737, 702  $\text{cm}^{-1}$ .

HRMS (ES-) calcd for  $\text{C}_{21}\text{H}_{18}\text{NS}^-$  [M-H] $^-$ : 316.1165, found: 316.1166.

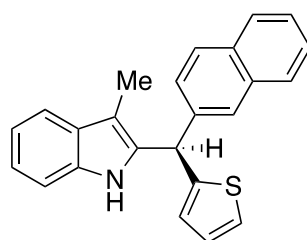

**3m**

**(R)-3-Methyl-2-(naphthalen-2-yl(thiophen-2-yl)methyl)-1H-indole (3m)** was prepared as white foam from (3-methyl-1H-indol-2-yl)(naphthalen-2-yl)(thiophen-2-yl)methanol **1m** (144.0 mg, 0.389 mmol) and **2a** (112.9 mg, 0.429 mmol) according to the General Procedure C (0 °C, 30 h, eluent: hexanes/dichloromethane = 3:2) in 76% yield (104.0 mg, 98% ee).

$[\alpha]_{\text{D}}^{26}$ :  $-5.9$  ( $c = 0.5$ ,  $\text{CH}_2\text{Cl}_2$ ). HPLC analysis of the product: Daicel CHIRALCEL OD-H column; 3% *i*-PrOH in hexanes; 1.0 mL/min; retention times: 14.8 min (major), 19.1 min (minor).

$^1\text{H NMR}$  (400 MHz, acetone- $d_6$ )  $\delta$  9.77 (s, 1H), 7.88 – 7.78 (m, 4H), 7.54 – 7.52 (m, 2H), 7.49 – 7.45 (m, 2H), 7.37 – 7.31 (m, 2H), 7.10 – 6.99 (m, 3H), 6.90 – 6.89 (m, 1H), 6.26 (s, 1H), 2.30 (s, 3H).

$^{13}\text{C NMR}$  (100 MHz, acetone- $d_6$ )  $\delta$  146.8, 141.0, 136.9, 136.3, 134.4, 133.4, 130.1, 129.0, 128.7, 128.4, 127.9, 127.61, 127.59, 127.2, 127.0, 126.7, 125.7, 121.9, 119.5, 119.0, 111.8,

108.0, 44.7, 8.8.

IR (thin film) 3445, 3053, 2922, 2858, 1457, 1310, 1264, 736, 703  $\text{cm}^{-1}$ .

HRMS (ES-) calcd for  $\text{C}_{24}\text{H}_{18}\text{NS}^-$  [M-H] $^-$ : 352.1165, found: 352.1160.

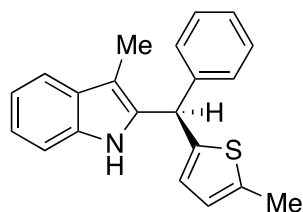

**3n**

**(R)-3-Methyl-2-((5-methylthiophen-2-yl)(phenyl)methyl)-1H-indole (3n)** was prepared as yellow foam from (3-methyl-1H-indol-2-yl)(5-methylthiophen-2-yl)(phenyl)methanol **1n** (133.4 mg, 0.400 mmol) and **2a** (115.9 mg, 0.440 mmol) according to the General Procedure C (0 °C, 30 h, eluent: hexanes/dichloromethane = 3:2) in 82% yield (104.3 mg, 98% ee).

$[\alpha]_{\text{D}}^{26}$ : -17.1 ( $c = 0.5$ ,  $\text{CH}_2\text{Cl}_2$ ). HPLC analysis of the product: Daicel CHIRALPAK AD-H column; 3% *i*-PrOH in hexanes; 1.0 mL/min; retention times: 8.4 min (major), 8.9 min (minor).

$^1\text{H NMR}$  (400 MHz, acetone- $d_6$ )  $\delta$  9.70 (s, 1H), 7.49 – 7.48 (m, 1H), 7.34 – 7.28 (m, 4H), 7.24 – 7.22 (m, 2H), 7.07 – 6.96 (m, 3H), 6.82 – 6.81 (m, 1H), 6.02 (s, 1H), 2.45 (s, 3H), 2.24 (s, 3H).

$^{13}\text{C NMR}$  (100 MHz, acetone- $d_6$ )  $\delta$  146.9, 140.1, 138.0, 136.9, 136.3, 130.0, 129.8, 127.5, 127.1, 127.0, 125.6, 121.9, 119.5, 118.9, 111.8, 107.8, 44.1, 15.4, 8.8.

IR (thin film) 3447, 3054, 2922, 2862, 1676, 1599, 1455, 1330, 1264, 1163, 1032, 917, 802, 736  $\text{cm}^{-1}$ .

HRMS (ES-) calcd for  $\text{C}_{21}\text{H}_{18}\text{NS}^-$  [M-H] $^-$ : 316.1165, found: 316.1159.



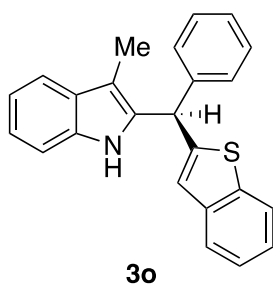

**(R)-2-(Benzo[b]thiophen-2-yl(phenyl)methyl)-3-methyl-1H-indole (3o)** was prepared as white foam from benzo[b]thiophen-2-yl(3-methyl-1H-indol-2-yl)(phenyl)methanol **1o** (45.7 mg, 0.124 mmol) and **2a** (34.2 mg, 0.136 mmol) according to the General Procedure C (0 °C, 72 h, eluent: hexanes/dichloromethane = 1:1) in 63% yield (26.0 mg, 78% ee).

$[\alpha]_D^{26}$ : -7.7 ( $c = 0.5$ , CH<sub>2</sub>Cl<sub>2</sub>). HPLC analysis of the product: Daicel CHIRALPAK AD-H column; 3% *i*-PrOH in hexanes; 1.0 mL/min; retention times: 17.1 min (major), 19.0 min (minor).

<sup>1</sup>H NMR (400 MHz, acetone-*d*<sub>6</sub>)  $\delta$  9.84 (s, 1H), 7.83 – 7.81 (m, 1H), 7.74 – 7.72 (m, 1H), 7.51 – 7.49 (m, 1H), 7.46 – 7.43 (m, 2H), 7.39 – 7.28 (m, 6H), 7.07 – 6.99 (m, 3H), 6.14 (s, 1H), 2.27 (s, 3H).

<sup>13</sup>C NMR (100 MHz, acetone-*d*<sub>6</sub>)  $\delta$  148.3, 142.7, 140.8, 140.8, 137.0, 135.8, 130.0, 129.5, 129.5, 128.0, 125.1, 124.9, 124.3, 123.9, 123.0, 122.0, 119.5, 119.0, 111.9, 108.2, 45.4, 8.8.

IR (thin film) 3443, 3056, 2921, 2860, 1595, 1456, 1380, 1183, 1077, 1017, 737, 667 cm<sup>-1</sup>.

HRMS (ES<sup>-</sup>) calcd for C<sub>24</sub>H<sub>18</sub>NS<sup>-</sup> [M-H]<sup>-</sup>: 352.1165, found: 352.1165.

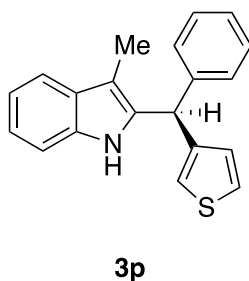

**(S)-3-Methyl-2-(phenyl(thiophen-3-yl)methyl)-1H-indole (3p)** was prepared as white foam from (3-methyl-1H-indol-2-yl)(phenyl)(thiophen-3-yl)methanol **1p** (132 mg, 0.41 mmol) and **2a** (119.2 mg, 0.45 mmol) according to the General Procedure C

(0 °C, 41 h, eluent: hexanes/dichloromethane = 3:2) in 85% yield (107.0 mg, 92% ee).  
[ $\alpha$ ]<sub>D</sub><sup>26</sup>: +8.2 (*c* = 0.5, CH<sub>2</sub>Cl<sub>2</sub>). HPLC analysis of the product: Daicel CHIRALPAK OD-H column; 3% *i*-PrOH in hexanes; 1.0 mL/min; retention times: 11.5 min (major), 13.1 min (minor).

<sup>1</sup>H NMR (400 MHz, acetone-*d*<sub>6</sub>)  $\delta$  9.60 (s, 1H), 7.50 – 7.48 (m, 1H), 7.43 – 7.41 (m, 1H), 7.33 – 7.21 (m, 6H), 7.07 – 6.99 (m, 4H), 5.88 (s, 1H), 2.24 (s, 3H).

<sup>13</sup>C NMR (100 MHz, acetone-*d*<sub>6</sub>)  $\delta$  144.2, 143.6, 136.9, 136.7, 130.1, 129.34 (2C), 129.25, 127.4, 126.7, 123.4, 121.7, 119.4, 118.8, 111.7, 107.6, 45.1, 8.8.

IR (thin film) 3415, 3049, 2921, 2856, 1453, 1261, 1085, 1017, 794, 736, 701, 580 cm<sup>-1</sup>.

HRMS (ES-) calcd for C<sub>20</sub>H<sub>16</sub>NS<sup>-</sup> [M-H]<sup>-</sup>: 302.1009 found: 302.1011.

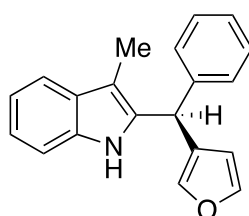

**3q**

**(S)-2-(Furan-3-yl(phenyl)methyl)-3-methyl-1H-indole (3q)** was prepared as yellow foam from furan-3-yl(3-methyl-1H-indol-2-yl)(phenyl)methanol **1q** (90.9 mg, 0.30 mmol) and **2a** (86.9 mg, 0.33 mmol) according to the General Procedure C (RT, 12 h, eluent: hexanes/dichloromethane = 3:2) in 44% yield (37.8 mg, 84% ee).

[ $\alpha$ ]<sub>D</sub><sup>26</sup>: -10.1 (*c* = 0.5, CH<sub>2</sub>Cl<sub>2</sub>). HPLC analysis of the product: Daicel CHIRALPAK AD-H column; 3% *i*-PrOH in hexanes; 1.0 mL/min; retention times: 10.6 min (major), 12.0 min (minor).

<sup>1</sup>H NMR (400 MHz, acetone-*d*<sub>6</sub>)  $\delta$  9.65 (s, 1H), 7.55 – 7.54 (m, 1H), 7.48 – 7.46 (m, 1H), 7.33 – 7.28 (m, 5H), 7.24 – 7.22 (m, 2H), 7.05 – 6.97 (m, 2H), 6.39 (m, 1H), 5.68 (s, 1H), 2.25 (s, 3H).

<sup>13</sup>C NMR (100 MHz, acetone-*d*<sub>6</sub>)  $\delta$  144.3, 143.3, 141.7, 136.8, 136.5, 130.1, 129.3, 129.1, 127.7, 127.4, 121.7, 119.4, 118.8, 112.1, 111.7, 107.3, 40.5, 8.7.

IR (thin film) 3332, 2976, 2930, 2864, 1455, 1381, 1120, 1074, 1028, 737, 563 cm<sup>-1</sup>.

HRMS (ES-) calcd for  $C_{20}H_{16}NO^-$  [M-H]<sup>-</sup>: 286.1237 found: 286.1233.

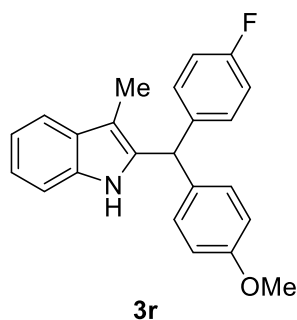

**2-((4-Fluorophenyl)(4-methoxyphenyl)methyl)-3-methyl-1H-indole (3r)** was prepared as light yellow foam from (4-fluorophenyl)(4-methoxyphenyl)(3-methyl-1H-indol-2-yl)methanol **1r** (65.2 mg, 0.180 mmol) and **2a** (49.7 mg, 0.189 mmol) according to the General Procedure C (0 °C, 30 h, eluent: hexanes/CH<sub>2</sub>Cl<sub>2</sub> = 2:3) in 81% yield (50.3 mg, 44% ee).

$[\alpha]_{D}^{26}$ : +7.3 ( $c = 1.0$ , CH<sub>2</sub>Cl<sub>2</sub>). HPLC analysis of the product: Daicel CHIRALPAK OD-H column; 12% *i*-PrOH in hexanes; 1.0 mL/min; retention times: 8.48 min (minor), 8.96 min (major).

<sup>1</sup>H NMR (400 MHz, acetone-*d*<sub>6</sub>)  $\delta$  9.50 (s, 1H), 7.48–7.46 (m, 1H), 7.27–7.20 (m, 3H), 7.14–7.00 (m, 6H), 6.90–6.86 (m, 2H), 5.83 (s, 1H), 3.78 (s, 3H), 2.18 (s, 3H).

<sup>13</sup>C NMR (100 MHz, acetone-*d*<sub>6</sub>)  $\delta$  161.9 (d,  $J = 241$  Hz), 158.9, 139.6 (d,  $J = 3$  Hz), 136.5 (d,  $J = 7$  Hz), 134.8, 131.1 (d,  $J = 8$  Hz), 130.3, 129.7, 121.2, 119.0, 118.3, 115.5, 115.2, 114.3, 111.3, 107.3, 55.0, 47.3, 8.3.

<sup>19</sup>F NMR (376 MHz, acetone-*d*<sub>6</sub>)  $\delta$  -118.4.

IR (thin film) 3453, 3052, 2924, 1605, 1506, 1254, 734 cm<sup>-1</sup>.

HRMS (ES<sup>-</sup>) calcd for C<sub>23</sub>H<sub>19</sub>FNO<sup>-</sup> [M-H]<sup>-</sup>: 344.1456, found: 344.1455.

#### IV. Study on the Influence of Additives

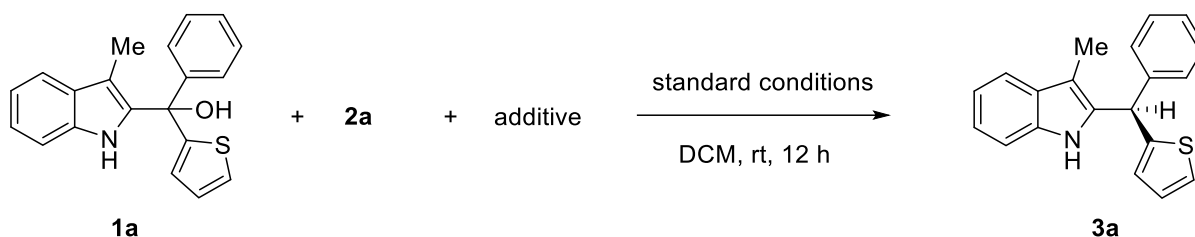

At room temperature, to an oven-dried 4-mL vial were added the tertiary alcohol **1a** (25  $\mu\text{mol}$ ), the hydride source **2a** (7.3 mg, 27.5  $\mu\text{mol}$ ), the additive (25  $\mu\text{mol}$ ) and a solution of (*R*)-**C1** (0.94 mg, 1.25  $\mu\text{mol}$ , 5.0 mol%) in DCM (0.5 mL). The mixture was stirred at room temperature for 12 h and then filtered through a silica gel pad and concentrated. The amount of each component (**1a**, **2a**, **3a**, and the additive) remaining in the mixture was determined by analysis of the  $^1\text{H}$  NMR spectrum of this crude mixture with  $\text{CH}_2\text{Br}_2$  as the internal standard. The ee value of **3a** was determined by HPLC analysis on a chiral stationary phase.

| Entry | Additive                | Additive recovery | Conversion <b>1a</b> (%) | Yield <sup>a</sup> <b>3a</b> (%) | Ee <sup>a</sup> <b>3a</b> (%) |
|-------|-------------------------|-------------------|--------------------------|----------------------------------|-------------------------------|
| 1     |                         | 90                | 100                      | 95                               | 91                            |
| 2     |                         | 82                | 70                       | 49                               | 94                            |
| 3     |                         | 95                | 100                      | 88                               | 96                            |
| 4     |                         | 85                | 100                      | 99                               | 94                            |
| 5     |                         | 95                | 100                      | 87                               | 94                            |
| 6     | $\text{Ph}_3\text{CSH}$ | 66                | 100                      | 83                               | 89                            |
| 7     |                         | 61                | 100                      | 77                               | 87                            |
| 8     |                         | 67                | 100                      | 73                               | 94                            |
| 9     |                         | 78                | 100                      | 64                               | 90                            |
| 10    |                         | 83                | 100                      | 75                               | 94                            |
| 11    | $\text{PPh}_3$          | 80                | 100                      | 95                               | 94                            |

|    |                                                                                   |    |     |    |    |
|----|-----------------------------------------------------------------------------------|----|-----|----|----|
| 12 |  | 67 | 100 | 57 | 94 |
| 13 |  | 89 | 100 | 98 | 94 |
| 14 |  | 90 | 100 | 92 | 95 |
| 15 |  | 87 | 100 | 80 | 94 |

<sup>a</sup>Reaction scale: **1a** (25  $\mu\text{mol}$ , **2a** (27.5  $\mu\text{mol}$ ), additive (25  $\mu\text{mol}$ ), (*R*)-**C1** (5 mol%), DCM (0.5 mL). Yield was determined by analysis of the <sup>1</sup>H NMR spectrum of the crude reaction mixture with CH<sub>2</sub>Br<sub>2</sub> as internal standard. Ee was determined by HPLC analysis on a chiral stationary phase.

## V. Mechanistic Experiments

### (1) Control experiment.

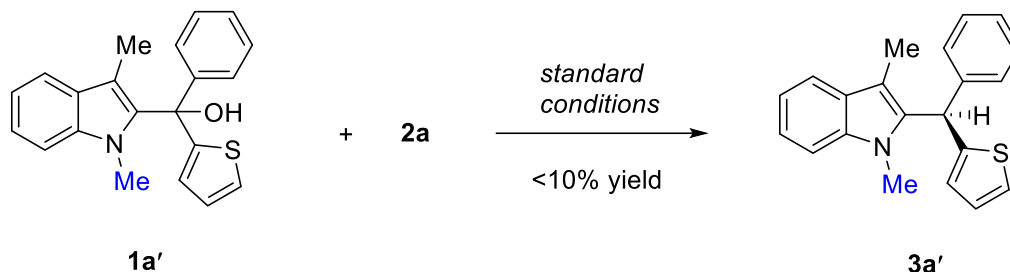

At room temperature, to an oven-dried 4-mL vial were added tertiary alcohol **1a'** (8.0 mg, 25  $\mu\text{mol}$ ) and **2a** (7.3 mg, 0.0275 mmol). A solution of the catalyst (*R*)-**C1** (0.94 mg, 1.25  $\mu\text{mol}$ , 5.0 mol%) in DCM (0.5 mL) was added. The reaction mixture was stirred for 12 h at room temperature or for 48 h at 0  $^{\circ}\text{C}$ . After that, the reaction mixture was filtered through a short pad of silica gel and then concentrated. The crude mixture was examined by  $^1\text{H}$  NMR and the ee value of the product was determined by HPLC. Reactions at both temperatures gave a messy mixture of essentially unidentifiable mixture. By comparison with the standard  $^1\text{H}$  NMR spectra of **1a** and **3a'**, the reaction at room temperature showed 87% conversion and **3a'** was formed in only 9% yield. The reaction at 0  $^{\circ}\text{C}$  showed 70% conversion and **3a'** was formed in only 7% yield.

### (2) Non-linear effects.

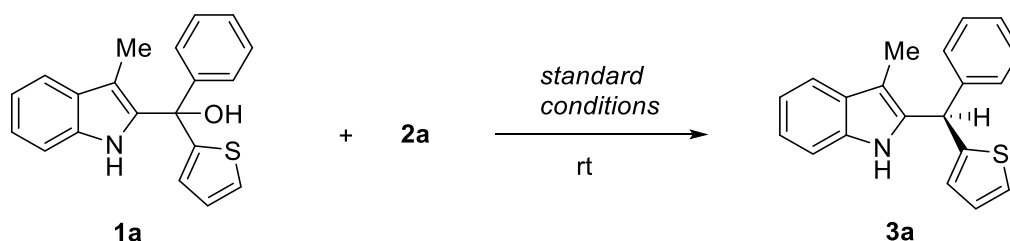

At room temperature, to an oven-dried 4-mL vial were added tertiary alcohol **1a** (8.0 mg, 25  $\mu\text{mol}$ ) and **2a** (7.3 mg, 27.5  $\mu\text{mol}$ ). A solution of catalyst (*R*)-**C1** (0.94 mg, 5 mol%) with different enantiopurities (1st run: 0% ee, 2nd run: 20% ee; 3rd run: 40% ee; 4th run: 60% ee; 5th run: 80% ee; 6th run: 100% ee) in DCM (0.5 mL) was added. The reaction mixture was stirred at room temperature for 12 h. After that, the reaction

mixture was filtered through a short pad of silica gel and then concentrated. The ee value of the product **3a** was determined by HPLC.

|                   |    |    |    |    |    |     |
|-------------------|----|----|----|----|----|-----|
| ee% ( <b>C1</b> ) | 0  | 20 | 40 | 60 | 80 | 100 |
| ee% ( <b>3a</b> ) | -4 | 16 | 35 | 55 | 75 | 96  |

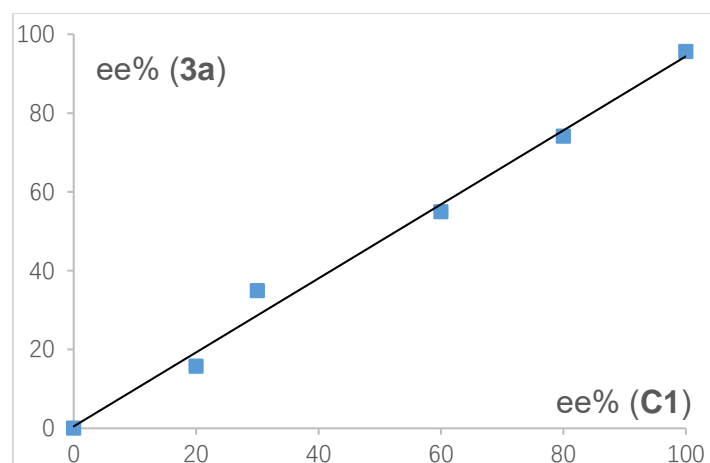

**Figure S1. Linear relationship between the ee values of product 3a and catalyst C1.**

### (3) Kinetic study.

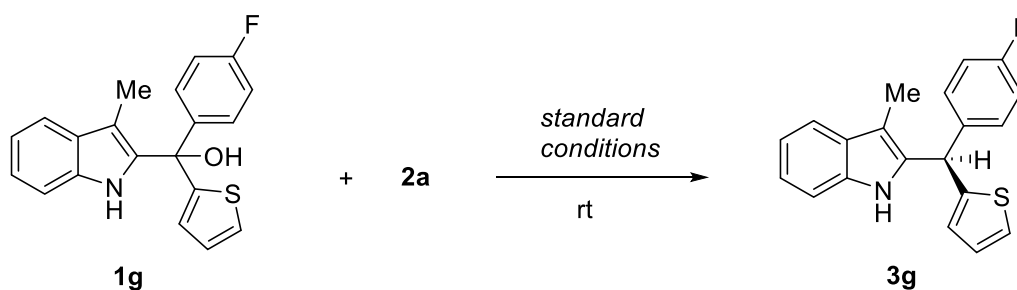

The reaction between substrate **1g** and reductant **2a** was used for kinetic study. To assess the order in species **X** (**X** = **2a** or catalyst **C1**), reactions of varying [**X**] were set up. For each reaction, to an oven-dried 4-mL vial were added **1g**, **2a**, and a solution of catalyst (*R*)-**C1** in DCM in the amounts illustrated in the tables below. The reaction mixture was quickly transferred into a 5-mm NMR tube, and the reaction progress was monitored by taking  $^{19}\text{F}$  NMR spectra every 50 seconds. The yield of **3g** was determined by analysis of  $^{19}\text{F}$  NMR spectra. A graph of [**3g**] vs. time was plotted for the three reactions with different [**X**]. A linear relationship within the first 10%



conversion was fitted to determine the initial rate.

**(a) Reaction order in nucleophile 2a.**

To an oven-dried 4-mL vial was added **1g** (8.4 mg, 25  $\mu\text{mol}$ ) and **2a** of different equivalents (1st run: 6.6 mg, 25  $\mu\text{mol}$ , 1 equiv; 2nd run: 13.2 mg, 50  $\mu\text{mol}$ , 2 equiv; 3<sup>rd</sup> run: 19.8 mg, 75  $\mu\text{mol}$ , 3 equiv; 3rd run: 26.3 mg, 100  $\mu\text{mol}$ , 4 equiv). A solution of (*R*)-**C1** (0.94 mg, 1.25  $\mu\text{mol}$ , 5 mol%) in DCM (0.5 mL) was quickly added. The mixture was immediately transferred to a 5-mm NMR tube and the data were taken and analyzed according to the general procedure outlined above.

| [2a] (M) | Initial rate (M/s) |
|----------|--------------------|
| 0.050    | 2.32E-05           |
| 0.100    | 1.72E-05           |
| 0.150    | 2.22E-05           |
| 0.200    | 2.52E-05           |

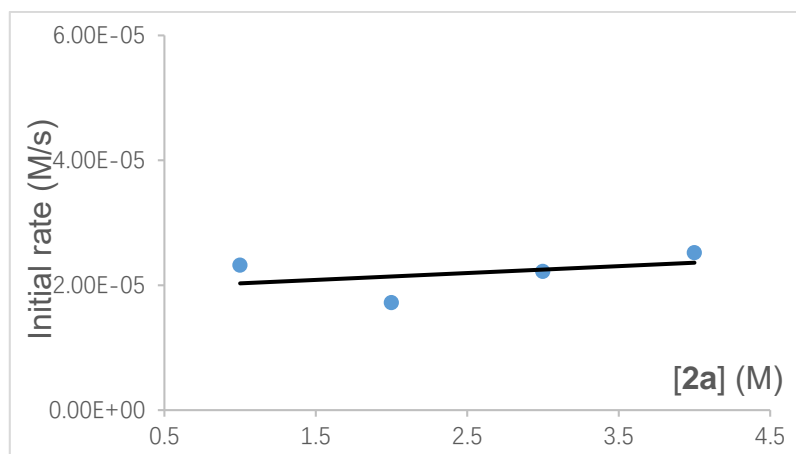

**Figure S2. Original data and plot of initial rate vs [2a].**

**(b) Reaction order in catalyst C1.**

To an oven-dried 4-mL vial were added **1g** (8.4 mg, 25  $\mu\text{mol}$ ) and **2a** (7.3 mg, 27.5  $\mu\text{mol}$ , 1.1 equiv). A solution of catalyst (*R*)-**C1** of different loadings (1st run: 2 mol%; 2nd run: 4 mol%; 3rd run: 6 mol%) in DCM (0.5 mL) was quickly added. The mixture was

immediately transferred to a 5-mm NMR tube and the data were taken and analyzed according to the general procedure outlined above.

| $[(R)-C1]$ (M) | Initial rate (M/s) |
|----------------|--------------------|
| 0.001          | 2.38E-06           |
| 0.002          | 4.84E-06           |
| 0.003          | 7.55E-06           |

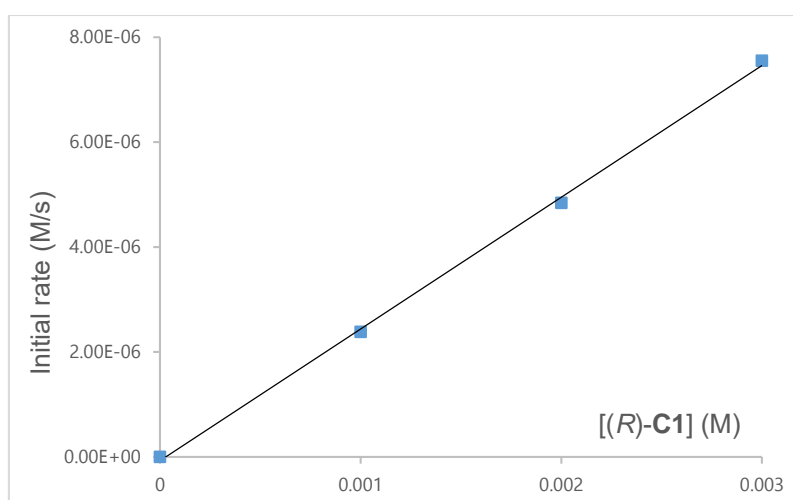

**Figure S3. Original data and plot of initial rate vs [C1].**

## VI. Study of the Product Biological Activities

### (1) Study of the Anticancer Activities

#### (a) Cell lines and cell culture

HeLa (ATCC® CCL-2™), MCF-7 (ATCC® HTB-22™), and A549 (ATCC® CCL-185™) cells were cultured in DMEM with 10% FBS and 50 U/mL penicillin and streptomycin. A2780 (ATCC) cells were cultured in RPMI 1640 with 10% FBS, 2 mM L-glutamine, and 50 U/mL penicillin and streptomycin. MRC-5 cells (human lung fibroblasts, ATCC® CCL-171) were maintained in MEM with 10% FBS, 1% L-glutamine, 1% NEAA, and 1% sodium pyruvate. HCT116 cells (ATCC® CCL-247™) were cultured in McCoy's 5A medium with 10% FBS and 50 U/mL penicillin and streptomycin.

#### (b) Cell viability test

Cancer cells ( $1.5 \times 10^3$  cells/well) or normal cells ( $2.5 \times 10^3$  cells/well) were cultured in 96-well plates for 48 h. Then, the culture medium was removed, and 200  $\mu$ L fresh medium containing various concentrations of compounds was added into each well to incubate at 37 °C for 72 h. After incubation, the culture medium was replaced with serum-free medium containing 1 mg/mL MTT to incubate at 37 °C for 2 h. Subsequently, the medium was aspirated, and 150  $\mu$ L DMSO was added to each well. The 96-well plates were placed on a shaker at 60 rpm for 15 min, then the absorption of 570 nm and 700 nm were measured by a microplate reader. The CC<sub>50</sub> values were calculated by Origin 2019.

## Study of the Antiviral Activities

### (a) Viruses and cells<sup>3</sup>

Rhabdomyosarcoma (RD) cells (ATCC number CCL-136) and Vero E6 cells (ATCC number CRL-1586) were maintained in Dulbecco's modified Eagle's medium (DMEM) containing 10% fetal bovine serum (FBS) with 100 U/mL penicillin and 100 µg/mL streptomycin in a humidified 5% CO<sub>2</sub> incubator at 37 °C. RD cells were infected with EV-A71 (SHZH98 strain) at a MOI of 0.01. To test the antiviral effects, cells were incubated in DMEM with 2% FBS and different concentrations of chemicals for 2 h. Then viruses were added to the cells. Samples were collected at 48 h after infection.

### (b) MTT assay

RD cells were seeded in 96-plates at 10,000 cells/well in DMEM with 2% FBS. The media were replaced with 100 µL/well of media containing various concentrations of chemicals after cells were attached. 48 h later, an MTT assay were performed as described.<sup>3</sup> The culture media were replaced with 100 µL/well containing MTT (5 mg/ml) in the serum-free DMEM. Then, cells were incubated for 4 h at 37 °C. Next, the medium was replaced with 100 µL/well of dimethyl sulfoxide. The absorbance was read at 590 nm with a microplate reader (BioTek Synergy™).

### (c) Cytopathic effects (CPE) assay<sup>4,5</sup>

RD cells were seeded in 24-well plates and incubated with 10%-FBS DMEM in the incubator for 24 h. After the culture media were removed, cells were infected with nil (mock) or EV-A71 at MOI of 0.01 and incubated in DMEM with 2% FBS for 36 h. The images of cell morphology were captured and recorded by a phase-contrast

3 J. Lu, L. Yi, J. Zhao, Y. Chen, M.C. Lin, H.-F. Kung and M.-L. He, *J. Virol.* 2012, **86**, 3767–3776.

4 Q. Dong, R. Men, X. Dan, Y. Chen, H. Li, G. Chen, B. Zee, M.H.T. Wang and M.-L. He, *Antiviral Res.* 2018, **150**, 39–46.

5 X. Dan, Q. Wan, L. Yi, J. Lu, Y. Jiao, H. Li, D. Song, Y. Chen, H. Xu and M.-L. He, *J. Virol.* 2019, **93**, e02322–18.

microscope associated with a CCD camera and computer.

**(d) Viral RNA isolation, reverse transcription and quantitative real-time PCR<sup>4,5</sup>**

To determine the EV-A71 viral RNA, the intracellular RNA were isolated with the TRIzol reagent (Ambion, Life Technologies) according to the manufacturer's protocol. Then, 2 µg of total RNA was used to synthesize cDNA by reverse transcription with PrimeScript RT reagent Kit (Takara). Viral DNA and cDNA are quantified by Real-time quantitative PCR (RT-qPCR) using SYBR Green Master Mix (Applied Biosystems, USA) on an applied Biosystems QuantStudio 3 real-time PCR system. The primers are as follows:

|       |         |                              |
|-------|---------|------------------------------|
| EV-71 | Forward | 5'-GCAGCCCAAAGAAGACTTCAC-3'  |
|       | Reverse | 5'-ATTTTCAGCAGCTTGGAGTGC-3'  |
|       | Reverse | 5'-GGCAAATCTGCCCAAGAATA-3'   |
| GAPDH | Forward | 5'-TGTGGGCATCAATGGATTTGG-3'  |
|       | Reverse | 5'-ACACCATGTATTCCGGGTCAAT-3' |

**(e) Virus titration**

To evaluate the extracellular virions, virus titers were determined by TCID<sub>50</sub> assay as reported previously.<sup>6</sup> Cells were cultured in 96-well plates for 24 h, then infected with 100 µL per well of serial 10-fold diluted supernatant. The 50% tissue culture-infected dose (TCID<sub>50</sub>) was calculated by the Spearman-Kärber method after 96 h of infection. The concentration required to reduce the cytopathic effect (CPE) by 50% (IC<sub>50</sub>) was determined by using the linear regression analysis of GraphPad Prism 8.0. Data were shown as mean values with standard deviations from three independent assays. Selectivity index (SI) is calculated by the ratio of CC<sub>50</sub> to IC<sub>50</sub>.

6 F. Zhou, Q. Wan, J. Lu, Y. Chen., G. Lu and M.-L. He, *iScience* 2019, **19**, 715-727.

## VII. DFT Studies

The rate-determining step of this reaction is the chiral phosphoric acid-catalyzed dehydration of tertiary alcohols **1a** to obtain the indolyl cation **IM**. However, the stereo-determining step for this reaction is the nucleophilic addition of the hydride **2a** on the indolyl cation **IM**. To evaluate the origins of stereoselectivity, density functional theory (DFT) calculations were performed. We first explored the stereo-determining transition structures. Geometry optimizations were conducted at B3LYP-D3(BJ) functional with the def2svp basis set in the Gaussian 16 package.<sup>7</sup> Single-point energies and solvent effects in dichloromethane were calculated with the CPCM solvation model at the M06-2X/def2tzvpp level of theory.<sup>8</sup> Conformational searches were conducted using the CREST conformer-rotamer ensemble sampling tool version 2.10.2 with xtb version 6.3.3.<sup>9</sup> Based on the results of conformational searches, the lowest energy conformers are depicted in Figure 2. The computed transition state **TS-R** delivering the preferred *R*-product is 3.6 kcal/mol lower than that of **TS-S** generating the *S*-product, in good accord with the 96% *ee* observed experimentally.

7 (a) S. Grimme, J. Antony, S. Ehrlich and H. Krieg, *J. Chem. Phys.* 2010, **132**, 154104; (b) S. Grimme, S. Ehrlich and L. Goerigk, *J. Comput. Chem.* 2011, **32**, 1456-1465; (c) M. J. Frisch, et al. *Gaussian 16*, revision A.03, Gaussian, Inc., 2016.

8 (a) Y. Zhao and D. G. Truhlar, *Acc. Chem. Res.* 2008, **41**, 157-167; (b) Y. Zhao and D. G. Truhlar, *Theor. Chem. Acc.* 2008, **120**, 215-241; (c) M. Cossi, N. Rega, G. Scalmani and V. Barone, *J. Comput. Chem.* 2003, **24**, 669-681; (d) V. Barone and M. Cossi, *J. Phys. Chem.* 1998, **102**, 1995-2001.

9 (a) S. Grimme, C. Bannwarth, S. Dohm, A. Hansen, J. Pisarek, P. Pracht, J. Seibert and F. Neese, *Angew. Chem. Int. Ed.* 2017, **56**, 14763-14769; (b) S. Grimme, *J. Chem. Theory Comput.* 2019, **15**, 2847-2862; (c) S. Grimme, C. Bannwarth, P. Shushkov, *J. Chem. Theory Comput.* 2017, **13**, 1989-2009; (d) C. Bannwarth, S. Ehlert, S. Grimme, *J. Chem. Theory Comput.* 2019, **15**, 1652-1671; (e) P. Pracht, E. Caldeweyher, S. Ehlert, S. Grimme, *ChemRxiv*, 2019, preprint. DOI:10.26434/chem-rxiv.8326202.v1.

## Absolute Calculation Energies, Enthalpies, and Free Energies

| Geometry | $E_{(\text{elec-B3LYP-D3BJ})}^1$ | $H_{(\text{corr-B3LYP-D3BJ})}^2$ | $G_{(\text{corr-B3LYP-D3BJ})}^3$ | $E_{(\text{solv-M062X})}^4$ | $IF^5$   |
|----------|----------------------------------|----------------------------------|----------------------------------|-----------------------------|----------|
| TS-S     | -4949.506744                     | 1.598913                         | 1.394554                         | -4951.930591                | -966.35  |
| TS-R     | -4949.511517                     | 1.598817                         | 1.394566                         | -4951.936287                | -1224.67 |

<sup>1</sup>The electronic energy calculated by B3LYP-D3BJ in gas phase. <sup>2</sup>The thermal correction to enthalpy calculated by B3LYP-D3BJ in gas phase. <sup>3</sup>The thermal correction to Gibbs free energy calculated by B3LYP-D3BJ in gas phase. <sup>4</sup>The electronic energy calculated by M062X in dichloromethane solvent. <sup>5</sup>The B3LYP-D3BJ calculated imaginary frequencies for the transition states.

### B3LYP-D3BJ Geometries for All the Transition Stats

|      |           |           |           |   |           |           |           |
|------|-----------|-----------|-----------|---|-----------|-----------|-----------|
| TS-S |           |           |           | H | -2.045646 | -0.439665 | -0.119408 |
| C    | -0.610023 | -0.325775 | 2.954675  | C | -1.821074 | -2.781639 | -3.196946 |
| C    | -0.893299 | -1.398834 | 3.849397  | H | -1.129416 | -4.295497 | -1.848999 |
| C    | -0.929470 | -1.139986 | 5.239065  | C | -2.190473 | -1.440744 | -3.349775 |
| C    | -0.677337 | 0.147953  | 5.683883  | H | -2.530757 | 0.440913  | -2.334205 |
| C    | -0.393675 | 1.197492  | 4.771208  | H | -1.755607 | -3.436743 | -4.067648 |
| C    | -0.354345 | 0.981325  | 3.401693  | H | -2.415975 | -1.044130 | -4.341240 |
| C    | -0.927417 | -2.179965 | 1.708011  | C | -1.110732 | -4.436991 | 0.681756  |
| C    | -1.100976 | -2.571770 | 3.059784  | C | -0.185498 | -5.303217 | 1.220168  |
| H    | -0.696635 | 0.365045  | 6.754222  | S | -2.604428 | -5.282443 | 0.320821  |
| H    | -0.199355 | 2.200226  | 5.157648  | C | -0.665607 | -6.638446 | 1.342773  |
| H    | -0.141626 | 1.778341  | 2.692127  | H | 0.800523  | -4.974378 | 1.543511  |
| N    | -0.652143 | -0.815881 | 1.684697  | C | -1.960831 | -6.773882 | 0.905874  |
| H    | -0.307087 | -0.253331 | 0.888850  | H | -0.076149 | -7.464537 | 1.741937  |
| C    | -1.528871 | -3.880014 | 3.649150  | H | -2.573097 | -7.674404 | 0.889403  |
| H    | -2.019959 | -3.703724 | 4.617856  | C | 1.298936  | -1.614511 | -2.577909 |
| H    | -0.678033 | -4.556016 | 3.829995  | C | 1.605604  | -2.927413 | -2.999568 |
| H    | -2.238766 | -4.417579 | 3.008321  | C | 1.582372  | -3.274053 | -4.346554 |
| H    | -1.144453 | -1.941411 | 5.949304  | C | 1.244105  | -2.283863 | -5.278567 |
| C    | -0.993357 | -2.972597 | 0.486517  | C | 0.911944  | -0.988516 | -4.857836 |
| C    | -1.517152 | -2.434641 | -0.799876 | C | 0.921541  | -0.635662 | -3.507372 |
| C    | -1.943969 | -1.103442 | -0.970675 | C | 1.592425  | -2.593675 | -0.465826 |
| C    | -1.479555 | -3.269490 | -1.942893 | H | 1.228866  | -2.531850 | -6.341881 |
| C    | -2.263006 | -0.608479 | -2.233325 | H | 0.624875  | -0.238057 | -5.597102 |

|   |           |           |           |   |           |           |           |
|---|-----------|-----------|-----------|---|-----------|-----------|-----------|
| H | 0.623965  | 0.359824  | -3.171372 | C | -1.431821 | 4.685032  | 0.858933  |
| N | 1.401362  | -1.447734 | -1.220414 | C | -0.218878 | 4.980762  | 1.731277  |
| H | 1.172585  | -0.509928 | -0.789044 | C | -0.601104 | 4.949798  | 3.247711  |
| H | 1.821206  | -4.289239 | -4.668777 | C | 0.747437  | 4.890163  | 3.992156  |
| H | 0.426310  | -2.902901 | 0.015854  | C | -3.259292 | 3.418815  | -0.143776 |
| S | 1.957984  | -3.954620 | -1.610920 | C | -1.974375 | 3.470235  | 0.436480  |
| C | 2.339448  | -2.537025 | 0.827750  | C | 1.031322  | 4.119058  | 1.746620  |
| C | 2.336791  | -1.377655 | 1.582035  | C | 1.628433  | 4.144295  | 3.016585  |
| C | 2.945235  | -3.712846 | 1.357152  | H | -1.176064 | 4.031230  | 3.442872  |
| C | 2.868616  | -1.361814 | 2.895794  | O | 0.936782  | 3.293926  | -0.479744 |
| H | 1.916813  | -0.453295 | 1.189531  | H | 0.679260  | 4.391607  | 4.971969  |
| C | 3.488218  | -3.717479 | 2.620934  | C | 1.628545  | 3.410073  | 0.708177  |
| H | 3.000353  | -4.615156 | 0.744979  | C | -4.065574 | 1.185606  | 0.638915  |
| C | 3.446605  | -2.554934 | 3.439347  | C | -3.959961 | 2.132606  | -0.390890 |
| C | 2.825012  | -0.186876 | 3.692509  | C | 2.854751  | 3.517118  | 3.224733  |
| H | 3.962798  | -4.621898 | 3.009353  | O | -1.218915 | 2.316137  | 0.529466  |
| C | 3.961024  | -2.527541 | 4.762148  | C | 3.481455  | 2.494385  | -1.532338 |
| C | 3.322755  | -0.194418 | 4.977302  | C | 2.878079  | 2.769998  | 0.884822  |
| H | 2.382016  | 0.715606  | 3.275116  | H | 3.333234  | 3.534639  | 4.207227  |
| C | 3.896496  | -1.373055 | 5.515979  | C | 3.474633  | 2.861998  | 2.156584  |
| H | 4.405391  | -3.436543 | 5.175474  | C | -4.820560 | 0.018560  | 0.502010  |
| H | 3.270714  | 0.711861  | 5.584619  | C | -4.671596 | 1.907798  | -1.567923 |
| H | 4.289348  | -1.365110 | 6.535525  | C | 4.139870  | 1.864769  | -2.597291 |
| P | -0.091275 | 2.010661  | -0.666383 | C | 3.548538  | 2.033378  | -0.216246 |
| O | 0.597072  | 0.767247  | -0.099251 | H | 4.447483  | 2.392824  | 2.311224  |
| H | -1.234164 | 7.867840  | 0.241099  | C | -5.439999 | -0.219340 | -0.755588 |
| H | -1.706650 | 7.524643  | 1.911526  | C | -5.452844 | 0.758167  | -1.776582 |
| H | -3.845704 | 6.797268  | -0.340376 | C | 4.825681  | 0.661185  | -2.308880 |
| C | -1.275366 | 7.071732  | 1.000874  | C | 4.341619  | 0.906155  | 0.042193  |
| C | -3.329904 | 5.865559  | -0.094989 | C | 5.002278  | 0.207565  | -0.973421 |
| H | 0.693599  | 6.987912  | 2.035669  | O | -0.645262 | 2.057694  | -2.046088 |
| C | 0.101319  | 6.441894  | 1.286857  | H | -4.608946 | 2.663373  | -2.349404 |
| C | -2.096033 | 5.884084  | 0.551503  | H | -3.558543 | 1.398452  | 1.576099  |
| H | 0.690900  | 6.396070  | 0.358181  | H | 2.908448  | 3.394898  | -1.728274 |
| C | -3.915941 | 4.635020  | -0.401245 | H | 4.432978  | 0.563954  | 1.068913  |
| H | -4.912656 | 4.602743  | -0.846253 | O | 5.393181  | -0.082717 | -3.321298 |
| H | -1.230253 | 5.803177  | 3.538606  | O | -6.074271 | -1.430620 | -0.936139 |
| H | 1.144661  | 5.903201  | 4.181938  | C | 4.496010  | -0.893845 | -4.060697 |



|   |           |           |           |             |           |           |           |
|---|-----------|-----------|-----------|-------------|-----------|-----------|-----------|
| H | 5.094357  | -1.435675 | -4.806636 | H           | 4.985955  | 1.148753  | -5.392460 |
| H | 3.982277  | -1.620497 | -3.414767 | H           | 5.149124  | 2.852648  | -5.829203 |
| H | 3.730014  | -0.299633 | -4.578888 | H           | 2.492067  | 1.354452  | -4.841826 |
| C | -5.336492 | -2.398558 | -1.665252 | H           | 1.886342  | 2.725166  | -3.893784 |
| H | -5.924819 | -3.326925 | -1.648743 | H           | 2.588941  | 2.999504  | -5.512353 |
| H | -5.178694 | -2.093870 | -2.711321 | H           | 5.278835  | 4.278715  | -3.230169 |
| H | -4.350997 | -2.585518 | -1.214385 | H           | 4.351255  | 4.618892  | -4.714680 |
| C | -5.076023 | -0.890611 | 1.728495  | H           | 3.526255  | 4.577479  | -3.150830 |
| C | -4.363088 | -0.349009 | 2.981040  | C           | 5.966401  | -0.949934 | -0.622731 |
| C | -6.594420 | -0.898425 | 2.013572  | C           | 7.380202  | -0.595338 | -1.134527 |
| C | -4.591096 | -2.340786 | 1.527721  | C           | 6.065203  | -1.159538 | 0.899625  |
| H | -4.698850 | 0.665140  | 3.242924  | C           | 5.517242  | -2.293752 | -1.233872 |
| H | -4.586219 | -1.003026 | 3.837372  | H           | 7.383730  | -0.453153 | -2.222243 |
| H | -3.271587 | -0.329000 | 2.861830  | H           | 7.742095  | 0.330122  | -0.659284 |
| H | -6.809686 | -1.519269 | 2.899024  | H           | 8.086510  | -1.404240 | -0.884070 |
| H | -6.956276 | 0.121645  | 2.217104  | H           | 6.797816  | -1.954173 | 1.107322  |
| H | -7.153223 | -1.304025 | 1.160128  | H           | 6.404955  | -0.252535 | 1.421566  |
| H | -3.546983 | -2.366690 | 1.193156  | H           | 5.108654  | -1.471062 | 1.338402  |
| H | -4.640410 | -2.882808 | 2.485537  | H           | 4.459513  | -2.496560 | -1.016866 |
| H | -5.207734 | -2.888362 | 0.808441  | H           | 5.662438  | -2.319976 | -2.318667 |
| C | -6.272232 | 0.689075  | -3.091211 | H           | 6.108599  | -3.116890 | -0.801194 |
| C | -6.899369 | 2.078460  | -3.366230 |             |           |           |           |
| C | -5.339201 | 0.339646  | -4.269406 | <b>TS-R</b> |           |           |           |
| C | -7.454680 | -0.301531 | -3.062586 | C           | -0.689780 | -0.251970 | 3.001226  |
| H | -6.149535 | 2.858808  | -3.552895 | C           | -0.968308 | -1.320123 | 3.902401  |
| H | -7.538133 | 2.023887  | -4.261346 | C           | -1.001633 | -1.051404 | 5.289128  |
| H | -7.524012 | 2.401878  | -2.519202 | C           | -0.751230 | 0.241232  | 5.725110  |
| H | -4.895791 | -0.658715 | -4.148869 | C           | -0.470957 | 1.284954  | 4.806246  |
| H | -5.898267 | 0.350615  | -5.219472 | C           | -0.434663 | 1.058313  | 3.437644  |
| H | -4.513169 | 1.063070  | -4.350388 | C           | -0.999772 | -2.116474 | 1.769927  |
| H | -8.078295 | -0.158547 | -2.168877 | C           | -1.170486 | -2.501754 | 3.117545  |
| H | -8.082624 | -0.123963 | -3.950260 | H           | -0.769041 | 0.464594  | 6.794243  |
| H | -7.143173 | -1.350180 | -3.088817 | H           | -0.277666 | 2.290913  | 5.185529  |
| C | 4.081778  | 2.588561  | -3.968381 | H           | -0.223160 | 1.849360  | 2.720189  |
| C | 5.157708  | 2.148540  | -4.981953 | N           | -0.731987 | -0.751568 | 1.733511  |
| C | 2.679845  | 2.406429  | -4.587361 | H           | -0.362196 | -0.208050 | 0.937943  |
| C | 4.320114  | 4.103060  | -3.742429 | C           | -1.575711 | -3.817150 | 3.708714  |
| H | 6.162506  | 2.162731  | -4.536646 | H           | -2.052846 | -3.651719 | 4.686207  |

|   |           |           |           |   |           |           |           |
|---|-----------|-----------|-----------|---|-----------|-----------|-----------|
| H | -0.713930 | -4.484036 | 3.873098  | C | 2.268611  | -2.511314 | 0.901365  |
| H | -2.288047 | -4.361763 | 3.076467  | C | 2.265495  | -1.336704 | 1.632043  |
| H | -1.212924 | -1.847967 | 6.006088  | C | 2.884524  | -3.672383 | 1.452526  |
| C | -1.076877 | -2.903035 | 0.539283  | C | 2.802222  | -1.291482 | 2.943041  |
| C | -1.263931 | -4.384869 | 0.692403  | H | 1.843073  | -0.421058 | 1.222706  |
| C | -0.237966 | -5.183658 | 1.217784  | C | 3.431413  | -3.648704 | 2.714333  |
| C | -2.485236 | -4.991777 | 0.352801  | H | 2.943563  | -4.586919 | 0.859424  |
| C | -0.417542 | -6.555616 | 1.387492  | C | 3.387005  | -2.470359 | 3.509426  |
| H | 0.698347  | -4.718791 | 1.521866  | C | 2.756838  | -0.099842 | 3.714626  |
| C | -2.669379 | -6.363413 | 0.534313  | H | 3.912272  | -4.542751 | 3.118653  |
| H | -3.302668 | -4.381684 | -0.029134 | C | 3.906239  | -2.412974 | 4.829420  |
| C | -1.634953 | -7.151340 | 1.046106  | C | 3.259541  | -0.078130 | 4.997273  |
| H | 0.395284  | -7.161114 | 1.795160  | H | 2.308272  | 0.791656  | 3.279781  |
| H | -3.629557 | -6.816874 | 0.277930  | C | 3.839953  | -1.242928 | 5.558666  |
| H | -1.778994 | -8.225604 | 1.182727  | H | 4.355755  | -3.311254 | 5.260266  |
| C | -1.606557 | -2.301118 | -0.683341 | H | 3.205985  | 0.840549  | 5.585526  |
| C | -1.931322 | -0.980530 | -0.970541 | H | 4.236509  | -1.211728 | 6.576343  |
| S | -1.662486 | -3.264854 | -2.162389 | P | -0.081113 | 2.003837  | -0.687445 |
| C | -2.178787 | -0.738683 | -2.341935 | O | 0.596325  | 0.776383  | -0.075600 |
| H | -2.020147 | -0.205118 | -0.218530 | H | -1.175999 | 7.902353  | 0.058764  |
| C | -2.055632 | -1.877366 | -3.104139 | H | -1.674239 | 7.596917  | 1.729139  |
| H | -2.396660 | 0.253653  | -2.729164 | H | -3.778852 | 6.831065  | -0.553351 |
| H | -2.183669 | -1.975384 | -4.180616 | C | -1.232965 | 7.122604  | 0.834283  |
| C | 1.262772  | -1.662795 | -2.528672 | C | -3.275331 | 5.902688  | -0.272408 |
| C | 1.567819  | -2.987265 | -2.915758 | H | 0.721427  | 7.050059  | 1.897568  |
| C | 1.559656  | -3.364063 | -4.255057 | C | 0.135873  | 6.490797  | 1.153248  |
| C | 1.245960  | -2.391878 | -5.214224 | C | -2.054908 | 5.930348  | 0.399382  |
| C | 0.918307  | -1.084382 | -4.828880 | H | 0.737449  | 6.421381  | 0.233756  |
| C | 0.906684  | -0.702627 | -3.485826 | C | -3.863365 | 4.668217  | -0.561030 |
| C | 1.524134  | -2.595520 | -0.392547 | H | -4.848906 | 4.629902  | -1.030126 |
| H | 1.246716  | -2.663655 | -6.271883 | H | -1.211323 | 5.906984  | 3.411192  |
| H | 0.652270  | -0.347692 | -5.589564 | H | 1.159560  | 5.995563  | 4.070040  |
| H | 0.614392  | 0.302638  | -3.175107 | C | -1.405055 | 4.735600  | 0.750203  |
| N | 1.338841  | -1.468655 | -1.173363 | C | -0.198159 | 5.041240  | 1.625803  |
| H | 1.127918  | -0.517454 | -0.759752 | C | -0.588918 | 5.042147  | 3.140033  |
| H | 1.792483  | -4.388669 | -4.550318 | C | 0.754787  | 4.983110  | 3.893497  |
| H | 0.328229  | -2.874732 | 0.093142  | C | -3.221290 | 3.456239  | -0.254445 |
| S | 1.883082  | -3.985841 | -1.500642 | C | -1.951061 | 3.514689  | 0.353975  |

|   |           |           |           |   |           |           |           |
|---|-----------|-----------|-----------|---|-----------|-----------|-----------|
| C | 1.044669  | 4.168971  | 1.663538  | H | -4.306130 | -2.521964 | -1.136266 |
| C | 1.635375  | 4.213618  | 2.936007  | C | -5.143101 | -0.745358 | 1.737681  |
| H | -1.173898 | 4.132999  | 3.349213  | C | -4.464147 | -0.155728 | 2.987959  |
| O | 0.951104  | 3.287834  | -0.544396 | C | -6.669857 | -0.725999 | 1.971783  |
| H | 0.675894  | 4.499744  | 4.880075  | C | -4.664341 | -2.206705 | 1.619389  |
| C | 1.640890  | 3.432546  | 0.643519  | H | -4.796510 | 0.872194  | 3.194473  |
| C | -4.080170 | 1.272046  | 0.592866  | H | -4.723107 | -0.768898 | 3.864164  |
| C | -3.919006 | 2.164157  | -0.476946 | H | -3.368750 | -0.153225 | 2.903378  |
| C | 2.855250  | 3.580472  | 3.163303  | H | -6.921458 | -1.305272 | 2.875611  |
| O | -1.208647 | 2.357151  | 0.495083  | H | -7.026621 | 0.305514  | 2.118702  |
| C | 3.498810  | 2.454530  | -1.567102 | H | -7.205130 | -1.162468 | 1.118389  |
| C | 2.883829  | 2.786156  | 0.839754  | H | -3.609287 | -2.252478 | 1.323388  |
| H | 3.327864  | 3.612542  | 4.148253  | H | -4.751990 | -2.703925 | 2.598496  |
| C | 3.475390  | 2.899112  | 2.111983  | H | -5.263576 | -2.780369 | 0.905179  |
| C | -4.835813 | 0.102943  | 0.479768  | C | -6.107504 | 0.595100  | -3.210787 |
| C | -4.567979 | 1.881778  | -1.676866 | C | -6.669470 | 1.979937  | -3.617513 |
| C | 4.153914  | 1.793931  | -2.615210 | C | -5.132905 | 0.132575  | -4.314420 |
| C | 3.550784  | 2.018560  | -0.241908 | C | -7.327128 | -0.349432 | -3.168448 |
| H | 4.442696  | 2.423567  | 2.281264  | H | -5.883652 | 2.717800  | -3.827250 |
| C | -5.403691 | -0.190327 | -0.790489 | H | -7.269074 | 1.878398  | -4.535232 |
| C | -5.351542 | 0.729615  | -1.863083 | H | -7.318939 | 2.388363  | -2.827866 |
| C | 4.821037  | 0.586937  | -2.298225 | H | -4.711211 | -0.858084 | -4.093742 |
| C | 4.324404  | 0.884762  | 0.044157  | H | -5.651516 | 0.074838  | -5.285494 |
| C | 4.982066  | 0.157202  | -0.952916 | H | -4.291916 | 0.835373  | -4.418771 |
| O | -0.640393 | 1.997220  | -2.066573 | H | -7.983351 | -0.119172 | -2.317130 |
| H | -4.456892 | 2.595471  | -2.491396 | H | -7.908470 | -0.214749 | -4.094477 |
| H | -3.615436 | 1.529661  | 1.540661  | H | -7.057081 | -1.407746 | -3.104592 |
| H | 2.940256  | 3.359312  | -1.784156 | C | 4.111688  | 2.488133  | -4.001972 |
| H | 4.401749  | 0.560836  | 1.077935  | C | 5.192622  | 2.018089  | -4.996660 |
| O | 5.385607  | -0.184599 | -3.291484 | C | 2.713009  | 2.301930  | -4.627219 |
| O | -6.054820 | -1.399138 | -0.932363 | C | 4.358505  | 4.005774  | -3.808855 |
| C | 4.483949  | -1.000179 | -4.020216 | H | 6.193699  | 2.035396  | -4.543063 |
| H | 5.082783  | -1.576328 | -4.739596 | H | 5.017632  | 1.010480  | -5.385960 |
| H | 3.945538  | -1.696517 | -3.361194 | H | 5.196278  | 2.703155  | -5.859412 |
| H | 3.738608  | -0.407188 | -4.569135 | H | 2.518227  | 1.245639  | -4.857414 |
| C | -5.308639 | -2.417420 | -1.574862 | H | 1.917715  | 2.643812  | -3.946799 |
| H | -5.864833 | -3.356954 | -1.444559 | H | 2.633249  | 2.873309  | -5.566804 |
| H | -5.187950 | -2.224401 | -2.652378 | H | 5.313558  | 4.186906  | -3.291715 |

|   |          |           |           |   |          |           |           |
|---|----------|-----------|-----------|---|----------|-----------|-----------|
| H | 4.402350 | 4.498560  | -4.792488 | H | 8.040008 | -1.500680 | -0.810678 |
| H | 3.562463 | 4.499418  | -3.236205 | H | 6.731176 | -1.987178 | 1.184026  |
| C | 5.926073 | -1.007393 | -0.572320 | H | 6.364157 | -0.272890 | 1.458872  |
| C | 7.348264 | -0.686257 | -1.082910 | H | 5.048975 | -1.472076 | 1.394249  |
| C | 6.012809 | -1.185519 | 0.954706  | H | 4.396863 | -2.538311 | -0.940965 |
| C | 5.458589 | -2.356650 | -1.157132 | H | 5.608503 | -2.408630 | -2.240377 |
| H | 7.360662 | -0.567466 | -2.173343 | H | 6.034705 | -3.179580 | -0.703995 |
| H | 7.722106 | 0.243299  | -0.625217 |   |          |           |           |

## VIII. Determination of the Absolute Stereochemistry

The structure and absolute stereochemistry of products **3a** and **3p** were determined by X-ray diffraction. The X-ray data have been deposited at the Cambridge Crystallographic Data Center (CCDC 2108959 for **3a**, CCDC2116827 for **3p**). The stereochemistry of other products was assumed by analogy.

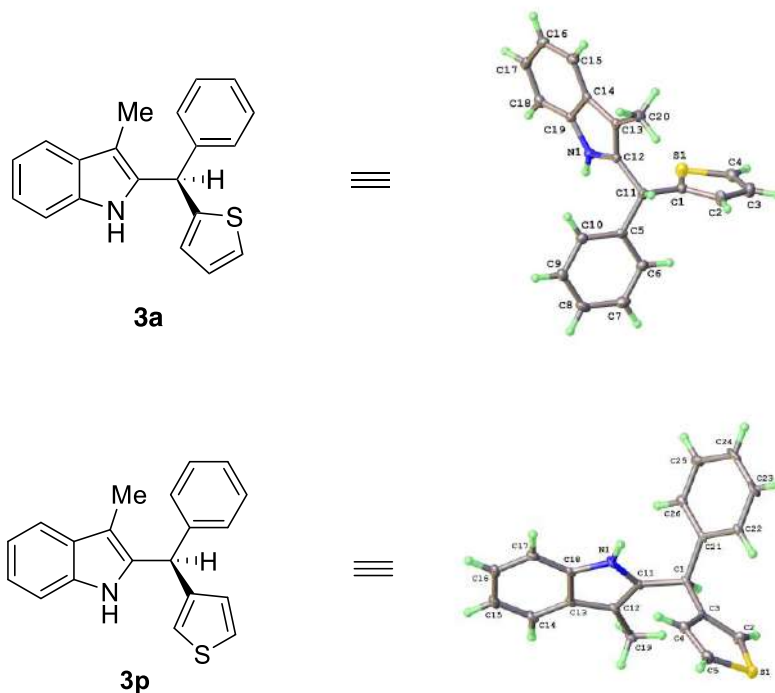

**Table S1. Crystal data and structure refinement for **3a****

|                     |                                    |
|---------------------|------------------------------------|
| Identification code | <b>3a</b>                          |
| Empirical formula   | C <sub>20</sub> H <sub>17</sub> NS |
| Formula weight      | 303.40                             |
| Temperature/K       | 100.00(10)                         |
| Crystal system      | triclinic                          |
| Space group         | P1                                 |
| a/Å                 | 8.3698(2)                          |
| b/Å                 | 8.6024(2)                          |

|                                               |                                                               |
|-----------------------------------------------|---------------------------------------------------------------|
| $c/\text{\AA}$                                | 11.6963(2)                                                    |
| $\alpha/^\circ$                               | 103.438(2)                                                    |
| $\beta/^\circ$                                | 103.111(2)                                                    |
| $\gamma/^\circ$                               | 102.977(2)                                                    |
| Volume/ $\text{\AA}^3$                        | 762.79(3)                                                     |
| Z                                             | 2                                                             |
| $\rho_{\text{calc}}/\text{g}/\text{cm}^3$     | 1.321                                                         |
| $\mu/\text{mm}^{-1}$                          | 1.823                                                         |
| F(000)                                        | 320.0                                                         |
| Crystal size/ $\text{mm}^3$                   | $0.16 \times 0.15 \times 0.13$                                |
| Radiation                                     | CuK $\alpha$ ( $\lambda = 1.54184$ )                          |
| $2\Theta$ range for data collection/ $^\circ$ | 8.132 to 153.656                                              |
| Index ranges                                  | $-10 \leq h \leq 10, -10 \leq k \leq 10, -11 \leq l \leq 14$  |
| Reflections collected                         | 12888                                                         |
| Independent reflections                       | 5874 [ $R_{\text{int}} = 0.0204, R_{\text{sigma}} = 0.0248$ ] |
| Data/restraints/parameters                    | 5874/183/435                                                  |
| Goodness-of-fit on $F^2$                      | 1.056                                                         |
| Final R indexes [ $I \geq 2\sigma(I)$ ]       | $R_1 = 0.0380, wR_2 = 0.1012$                                 |
| Final R indexes [all data]                    | $R_1 = 0.0389, wR_2 = 0.1022$                                 |
| Largest diff. peak/hole / $e \text{\AA}^{-3}$ | 0.71/-0.41                                                    |
| Flack parameter                               | 0.011(6)                                                      |

**Table S2. Fractional Atomic Coordinates ( $\times 10^4$ ) and Equivalent Isotropic Displacement Parameters ( $\text{\AA}^2 \times 10^3$ ) for 3a.  $U_{\text{eq}}$  is defined as 1/3 of the trace of the orthogonalised  $U_{ij}$  tensor.**

| Atom | $x$ | $y$ | $z$ | $U(\text{eq})$ |
|------|-----|-----|-----|----------------|
|------|-----|-----|-----|----------------|

|       |            |            |            |          |
|-------|------------|------------|------------|----------|
| S(1)  | 4066.0(10) | 4632.0(10) | 6213.1(8)  | 22.5(2)  |
| S(1B) | 4983(16)   | 2676(14)   | 4252(11)   | 23(3)    |
| N(1)  | 7305(3)    | 5356(3)    | 8717(2)    | 15.5(5)  |
| C(1)  | 5355(4)    | 3485(3)    | 5758(3)    | 16.5(5)  |
| C(2)  | 4864(7)    | 2816(6)    | 4463(5)    | 24.4(14) |
| C(2B) | 4079(18)   | 4280(20)   | 5850(30)   | 22(2)    |
| C(3)  | 3401(4)    | 3306(4)    | 3910(3)    | 26.8(7)  |
| C(4)  | 2867(4)    | 4257(4)    | 4752(3)    | 22.1(6)  |
| C(5)  | 6174(4)    | 1764(3)    | 7180(3)    | 14.3(6)  |
| C(6)  | 4637(4)    | 507(4)     | 6546(3)    | 18.2(6)  |
| C(7)  | 4153(4)    | -853(4)    | 6968(3)    | 23.7(7)  |
| C(8)  | 5195(4)    | -979(4)    | 8031(3)    | 23.3(7)  |
| C(9)  | 6743(4)    | 252(4)     | 8662(3)    | 20.5(6)  |
| C(10) | 7220(4)    | 1613(4)    | 8235(3)    | 17.8(6)  |
| C(11) | 6779(3)    | 3214(3)    | 6678(3)    | 14.2(6)  |
| C(12) | 7792(3)    | 4825(3)    | 7673(3)    | 13.8(5)  |
| C(13) | 9203(4)    | 6015(4)    | 7686(3)    | 14.7(6)  |
| C(14) | 9617(4)    | 7358(4)    | 8804(3)    | 14.8(6)  |
| C(15) | 10914(4)   | 8891(4)    | 9337(3)    | 18.7(6)  |
| C(16) | 10990(4)   | 9885(4)    | 10480(3)   | 20.5(6)  |
| C(17) | 9828(4)    | 9370(4)    | 11108(3)   | 20.5(6)  |
| C(18) | 8529(4)    | 7859(4)    | 10602(3)   | 18.6(6)  |
| C(19) | 8427(4)    | 6892(3)    | 9442(3)    | 15.0(6)  |
| C(20) | 10185(4)   | 5926(4)    | 6766(3)    | 20.2(6)  |
| S(1A) | 98(3)      | 4328(3)    | 1820(2)    | 32.8(6)  |
| S(1C) | 1006(3)    | 7528(3)    | 3531.4(18) | 20.3(5)  |
| N(1A) | 5095(3)    | 7496(3)    | 3899(2)    | 18.1(5)  |

|        |          |          |          |          |
|--------|----------|----------|----------|----------|
| C(1A)  | 1475(4)  | 6218(4)  | 2372(3)  | 20.2(6)  |
| C(2A)  | 1027(14) | 7231(15) | 3348(9)  | 24.8(18) |
| C(2C)  | 251(13)  | 4671(15) | 2018(10) | 37(2)    |
| C(3A)  | -611(5)  | 6156(5)  | 3516(4)  | 36.8(8)  |
| C(4A)  | -1019(5) | 4631(5)  | 2717(4)  | 35.7(8)  |
| C(5A)  | 3185(4)  | 5404(4)  | 928(3)   | 17.5(6)  |
| C(6A)  | 2070(4)  | 4770(4)  | -272(3)  | 26.7(8)  |
| C(7A)  | 2264(5)  | 3494(4)  | -1120(3) | 29.0(8)  |
| C(8A)  | 3601(4)  | 2839(4)  | -808(3)  | 25.7(7)  |
| C(9A)  | 4724(4)  | 3446(4)  | 348(4)   | 25.3(7)  |
| C(10A) | 4561(4)  | 4675(4)  | 1228(3)  | 19.4(6)  |
| C(11A) | 2902(4)  | 6833(4)  | 1843(3)  | 17.5(6)  |
| C(12A) | 4551(4)  | 7876(4)  | 2818(3)  | 17.6(6)  |
| C(13A) | 5780(4)  | 9183(4)  | 2760(3)  | 16.8(6)  |
| C(14A) | 7175(4)  | 9640(4)  | 3873(3)  | 16.2(6)  |
| C(15A) | 8797(4)  | 10844(4) | 4341(3)  | 19.6(6)  |
| C(16A) | 9858(4)  | 10935(4) | 5464(3)  | 21.4(7)  |
| C(17A) | 9336(4)  | 9871(4)  | 6142(3)  | 21.5(7)  |
| C(18A) | 7740(4)  | 8673(4)  | 5705(3)  | 18.9(6)  |
| C(19A) | 6697(4)  | 8572(4)  | 4571(3)  | 17.6(6)  |
| C(20A) | 5695(4)  | 9987(4)  | 1750(3)  | 21.5(6)  |

**Table S3. Anisotropic Displacement Parameters ( $\text{\AA}^2 \times 10^3$ ) for 3a. The Anisotropic displacement factor exponent takes the form:  $-2\pi^2[h^2a^*U_{11}+2hka^*b^*U_{12}+\dots]$ .**

| Atom | $U_{11}$ | $U_{22}$ | $U_{33}$ | $U_{23}$ | $U_{13}$ | $U_{12}$ |
|------|----------|----------|----------|----------|----------|----------|
| S(1) | 23.5(4)  | 26.1(4)  | 19.6(5)  | 5.8(3)   | 5.2(3)   | 12.5(3)  |



|       |          |          |          |          |          |          |
|-------|----------|----------|----------|----------|----------|----------|
| S(1B) | 29(4)    | 26(5)    | 16(2)    | 7(2)     | 4.2(19)  | 17(4)    |
| N(1)  | 16.2(11) | 14.4(11) | 16.4(13) | 4.4(10)  | 7.1(10)  | 3.5(9)   |
| C(1)  | 17.2(12) | 15.0(12) | 17.7(13) | 6.6(10)  | 4.4(9)   | 4.8(10)  |
| C(2)  | 30(2)    | 27(3)    | 20.4(18) | 8.1(15)  | 3.9(13)  | 19(2)    |
| C(2B) | 22(3)    | 21(4)    | 22(2)    | 6.8(17)  | 4.9(15)  | 8(3)     |
| C(3)  | 31.0(14) | 26.3(15) | 20.9(13) | 6.3(11)  | 1.4(11)  | 11.6(12) |
| C(4)  | 21.4(13) | 21.4(14) | 25.0(13) | 10.3(11) | 4.8(10)  | 7.8(11)  |
| C(5)  | 16.1(13) | 12.6(12) | 16.0(15) | 3.5(11)  | 7.2(11)  | 5.6(10)  |
| C(6)  | 18.3(14) | 15.9(14) | 18.1(16) | 2.7(12)  | 3.5(12)  | 4.9(11)  |
| C(7)  | 22.9(15) | 18.5(14) | 26.9(18) | 4.7(13)  | 8.4(13)  | 1.8(12)  |
| C(8)  | 33.8(17) | 14.3(14) | 27.2(18) | 9.8(12)  | 13.6(14) | 8.9(12)  |
| C(9)  | 25.9(15) | 20.3(15) | 18.1(16) | 7.8(12)  | 6.9(12)  | 9.8(12)  |
| C(10) | 18.7(14) | 16.2(13) | 18.3(16) | 4.1(11)  | 4.6(12)  | 6.6(11)  |
| C(11) | 14.3(12) | 14.9(13) | 13.5(14) | 3.9(11)  | 4.2(11)  | 4.7(10)  |
| C(12) | 15.6(12) | 14.5(13) | 12.0(14) | 5.1(11)  | 2.8(11)  | 6.0(10)  |
| C(13) | 15.3(12) | 16.3(13) | 14.1(15) | 6.4(11)  | 3.4(11)  | 6.4(10)  |
| C(14) | 17.0(13) | 15.8(13) | 13.7(15) | 7.1(11)  | 3.6(11)  | 7.1(11)  |
| C(15) | 16.8(13) | 16.9(14) | 22.1(17) | 7.1(12)  | 4.0(12)  | 4.6(11)  |
| C(16) | 18.8(14) | 14.8(13) | 23.8(17) | 4.7(12)  | 1.2(12)  | 3.3(11)  |
| C(17) | 25.5(15) | 17.8(15) | 16.2(16) | 2.0(12)  | 1.6(12)  | 10.1(12) |
| C(18) | 22.2(14) | 19.7(14) | 18.5(16) | 8.4(12)  | 7.5(12)  | 10.7(12) |
| C(19) | 14.8(13) | 13.1(13) | 17.1(15) | 5.6(11)  | 2.9(11)  | 5.1(10)  |
| C(20) | 23.1(14) | 17.5(14) | 21.8(17) | 6.0(12)  | 10.7(13) | 5.3(12)  |
| S(1A) | 32.8(9)  | 32.6(11) | 33.3(11) | 9.1(9)   | 9.1(8)   | 11.4(8)  |
| S(1C) | 23.6(8)  | 21.4(10) | 16.4(9)  | 1.8(7)   | 4.4(7)   | 13.1(6)  |
| N(1A) | 19.0(12) | 17.7(12) | 17.1(13) | 6.6(10)  | 2.5(10)  | 5.7(10)  |
| C(1A) | 21.3(12) | 23.8(12) | 17.1(13) | 5.7(10)  | 2.1(10)  | 13.4(10) |

|        |          |          |          |          |          |          |
|--------|----------|----------|----------|----------|----------|----------|
| C(2A)  | 26(2)    | 27(2)    | 24(3)    | 8.6(16)  | 2.2(19)  | 16.4(15) |
| C(2C)  | 37(3)    | 33(2)    | 37(3)    | 8.1(16)  | 9(2)     | 8.8(16)  |
| C(3A)  | 33.4(13) | 50.5(15) | 34.0(15) | 16.0(11) | 9.7(11)  | 23.1(11) |
| C(4A)  | 28.8(13) | 44.0(14) | 34.4(15) | 19.4(11) | 2.3(11)  | 9.8(11)  |
| C(5A)  | 18.1(13) | 16.1(14) | 17.0(16) | 4.6(12)  | 3.4(12)  | 4.5(11)  |
| C(6A)  | 25.7(16) | 19.6(15) | 27.8(19) | 7.2(14)  | -5.4(13) | 6.4(13)  |
| C(7A)  | 33.8(18) | 27.5(17) | 19.0(17) | 3.1(14)  | 4.4(14)  | 3.6(14)  |
| C(8A)  | 31.2(17) | 18.7(14) | 27.1(18) | 2.6(13)  | 17.8(14) | 2.2(13)  |
| C(9A)  | 24.7(16) | 25.7(16) | 35(2)    | 15.2(15) | 15.0(14) | 12.5(13) |
| C(10A) | 14.1(13) | 30.6(16) | 6.1(14)  | 4.2(12)  | 0.4(11)  | -3.6(12) |
| C(11A) | 18.1(13) | 15.2(13) | 17.2(15) | 4.6(12)  | 0.8(11)  | 5.5(11)  |
| C(12A) | 19.3(14) | 16.2(13) | 17.2(16) | 4.3(11)  | 3.1(12)  | 8.0(11)  |
| C(13A) | 17.2(13) | 16.5(13) | 15.7(15) | 1.6(11)  | 4.0(11)  | 7.0(11)  |
| C(14A) | 18.9(13) | 16.2(13) | 14.5(15) | 2.5(11)  | 5.1(11)  | 9.3(11)  |
| C(15A) | 21.7(15) | 17.2(14) | 20.9(17) | 3.8(12)  | 7.7(12)  | 8.2(12)  |
| C(16A) | 19.0(14) | 19.4(14) | 20.7(17) | -0.4(12) | 3.2(12)  | 5.0(11)  |
| C(17A) | 20.9(15) | 24.2(16) | 18.6(16) | 3.5(13)  | 3.7(12)  | 10.2(12) |
| C(18A) | 23.8(15) | 18.2(14) | 17.1(15) | 5.6(12)  | 7.0(12)  | 9.9(12)  |
| C(19A) | 18.4(13) | 17.0(13) | 18.1(16) | 3.3(12)  | 5.9(11)  | 7.9(11)  |
| C(20A) | 22.4(15) | 21.2(15) | 21.0(17) | 6.9(13)  | 5.4(13)  | 7.2(12)  |

**Table S4. Bond Lengths for 3a**

| Atom  | Atom | Length/Å  | Atom  | Atom  | Length/Å |
|-------|------|-----------|-------|-------|----------|
| S(1)  | C(1) | 1.708(3)  | S(1A) | C(1A) | 1.650(4) |
| S(1)  | C(4) | 1.689(3)  | S(1A) | C(4A) | 1.572(5) |
| S(1B) | C(1) | 1.664(12) | S(1C) | C(1A) | 1.730(4) |

|             |           |              |           |
|-------------|-----------|--------------|-----------|
| S(1B) C(3)  | 1.546(13) | S(1C) C(3A)  | 1.577(5)  |
| N(1) C(12)  | 1.384(4)  | N(1A) C(12A) | 1.382(4)  |
| N(1) C(19)  | 1.381(4)  | N(1A) C(19A) | 1.378(4)  |
| C(1) C(2)   | 1.414(6)  | C(1A) C(2A)  | 1.443(11) |
| C(1) C(2B)  | 1.40(2)   | C(1A) C(2C)  | 1.389(11) |
| C(1) C(11)  | 1.514(4)  | C(1A) C(11A) | 1.515(4)  |
| C(2) C(3)   | 1.447(6)  | C(2A) C(3A)  | 1.553(12) |
| C(2B)C(4)   | 1.44(2)   | C(2C) C(4A)  | 1.481(13) |
| C(3) C(4)   | 1.353(5)  | C(3A) C(4A)  | 1.340(6)  |
| C(5) C(6)   | 1.394(4)  | C(5A) C(6A)  | 1.399(4)  |
| C(5) C(10)  | 1.393(4)  | C(5A) C(10A) | 1.445(4)  |
| C(5) C(11)  | 1.532(4)  | C(5A) C(11A) | 1.532(4)  |
| C(6) C(7)   | 1.386(4)  | C(6A) C(7A)  | 1.364(5)  |
| C(7) C(8)   | 1.390(5)  | C(7A) C(8A)  | 1.377(5)  |
| C(8) C(9)   | 1.389(5)  | C(8A) C(9A)  | 1.363(5)  |
| C(9) C(10)  | 1.390(4)  | C(9A) C(10A) | 1.348(5)  |
| C(11) C(12) | 1.507(4)  | C(11A)C(12A) | 1.505(4)  |
| C(12) C(13) | 1.373(4)  | C(12A)C(13A) | 1.369(4)  |
| C(13) C(14) | 1.441(4)  | C(13A)C(14A) | 1.441(4)  |
| C(13) C(20) | 1.493(4)  | C(13A)C(20A) | 1.499(4)  |
| C(14) C(15) | 1.405(4)  | C(14A)C(15A) | 1.408(4)  |
| C(14) C(19) | 1.416(4)  | C(14A)C(19A) | 1.416(4)  |
| C(15) C(16) | 1.389(5)  | C(15A)C(16A) | 1.382(5)  |
| C(16) C(17) | 1.401(5)  | C(16A)C(17A) | 1.405(5)  |
| C(17) C(18) | 1.392(4)  | C(17A)C(18A) | 1.391(5)  |
| C(18) C(19) | 1.390(4)  | C(18A)C(19A) | 1.385(5)  |

**Table S5. Bond Angles for 3a**

| Atom  | Atom  | Atom  | Angle/°   | Atom   | Atom   | Atom   | Angle/°  |
|-------|-------|-------|-----------|--------|--------|--------|----------|
| C(4)  | S(1)  | C(1)  | 92.66(16) | C(4A)  | S(1A)  | C(1A)  | 96.1(2)  |
| C(3)  | S(1B) | C(1)  | 93.8(7)   | C(3A)  | S(1C)  | C(1A)  | 94.4(2)  |
| C(19) | N(1)  | C(12) | 109.4(2)  | C(19A) | N(1A)  | C(12A) | 109.2(3) |
| C(2)  | C(1)  | S(1)  | 111.4(3)  | C(2A)  | C(1A)  | S(1A)  | 110.4(6) |
| C(2)  | C(1)  | C(11) | 126.8(3)  | C(2A)  | C(1A)  | C(11A) | 125.2(6) |
| C(2B) | C(1)  | S(1B) | 104.4(13) | C(2C)  | C(1A)  | S(1C)  | 107.2(6) |
| C(2B) | C(1)  | C(11) | 134.4(12) | C(2C)  | C(1A)  | C(11A) | 130.4(6) |
| C(11) | C(1)  | S(1)  | 121.8(2)  | C(11A) | C(1A)  | S(1A)  | 124.2(2) |
| C(11) | C(1)  | S(1B) | 121.2(5)  | C(11A) | C(1A)  | S(1C)  | 122.1(2) |
| C(1)  | C(2)  | C(3)  | 110.1(4)  | C(1A)  | C(2A)  | C(3A)  | 108.2(8) |
| C(1)  | C(2B) | C(4)  | 120(2)    | C(1A)  | C(2C)  | C(4A)  | 113.2(9) |
| C(4)  | C(3)  | S(1B) | 123.2(5)  | C(4A)  | C(3A)  | S(1C)  | 117.8(3) |
| C(4)  | C(3)  | C(2)  | 112.7(3)  | C(4A)  | C(3A)  | C(2A)  | 106.9(5) |
| C(3)  | C(4)  | S(1)  | 113.1(3)  | C(3A)  | C(4A)  | S(1A)  | 118.4(3) |
| C(3)  | C(4)  | C(2B) | 98.9(12)  | C(3A)  | C(4A)  | C(2C)  | 107.4(6) |
| C(6)  | C(5)  | C(11) | 121.0(3)  | C(6A)  | C(5A)  | C(10A) | 117.5(3) |
| C(10) | C(5)  | C(6)  | 118.6(3)  | C(6A)  | C(5A)  | C(11A) | 118.9(3) |
| C(10) | C(5)  | C(11) | 120.2(3)  | C(10A) | C(5A)  | C(11A) | 123.6(3) |
| C(7)  | C(6)  | C(5)  | 120.5(3)  | C(7A)  | C(6A)  | C(5A)  | 121.1(3) |
| C(6)  | C(7)  | C(8)  | 120.3(3)  | C(6A)  | C(7A)  | C(8A)  | 119.9(3) |
| C(9)  | C(8)  | C(7)  | 119.7(3)  | C(9A)  | C(8A)  | C(7A)  | 120.4(3) |
| C(8)  | C(9)  | C(10) | 119.7(3)  | C(10A) | C(9A)  | C(8A)  | 122.0(3) |
| C(9)  | C(10) | C(5)  | 121.1(3)  | C(9A)  | C(10A) | C(5A)  | 119.1(3) |
| C(1)  | C(11) | C(5)  | 113.8(2)  | C(1A)  | C(11A) | C(5A)  | 112.1(2) |
| C(12) | C(11) | C(1)  | 110.7(2)  | C(12A) | C(11A) | C(1A)  | 112.9(3) |

|                   |          |                    |          |
|-------------------|----------|--------------------|----------|
| C(12) C(11) C(5)  | 113.2(2) | C(12A)C(11A)C(5A)  | 111.4(2) |
| N(1) C(12) C(11)  | 122.0(2) | N(1A) C(12A)C(11A) | 121.8(3) |
| C(13) C(12) N(1)  | 109.7(3) | C(13A)C(12A)N(1A)  | 110.0(3) |
| C(13) C(12) C(11) | 128.2(3) | C(13A)C(12A)C(11A) | 127.9(3) |
| C(12) C(13) C(14) | 106.4(3) | C(12A)C(13A)C(14A) | 106.2(3) |
| C(12) C(13) C(20) | 127.6(3) | C(12A)C(13A)C(20A) | 127.1(3) |
| C(14) C(13) C(20) | 126.0(3) | C(14A)C(13A)C(20A) | 126.7(3) |
| C(15) C(14) C(13) | 133.4(3) | C(15A)C(14A)C(13A) | 133.8(3) |
| C(15) C(14) C(19) | 119.1(3) | C(15A)C(14A)C(19A) | 118.6(3) |
| C(19) C(14) C(13) | 107.5(3) | C(19A)C(14A)C(13A) | 107.6(3) |
| C(16) C(15) C(14) | 118.5(3) | C(16A)C(15A)C(14A) | 118.7(3) |
| C(15) C(16) C(17) | 121.3(3) | C(15A)C(16A)C(17A) | 121.2(3) |
| C(18) C(17) C(16) | 121.5(3) | C(18A)C(17A)C(16A) | 121.4(3) |
| C(19) C(18) C(17) | 117.0(3) | C(19A)C(18A)C(17A) | 117.0(3) |
| N(1) C(19) C(14)  | 106.9(3) | N(1A) C(19A)C(14A) | 107.0(3) |
| N(1) C(19) C(18)  | 130.4(3) | N(1A) C(19A)C(18A) | 130.0(3) |
| C(18) C(19) C(14) | 122.6(3) | C(18A)C(19A)C(14A) | 123.0(3) |

**Table S6. Torsion Angles for 3a**

| A     | B    | C     | D     | Angle/°  | A     | B     | C      | D      | Angle/°   |
|-------|------|-------|-------|----------|-------|-------|--------|--------|-----------|
| S(1)  | C(1) | C(2)  | C(3)  | -0.2(4)  | S(1A) | C(1A) | C(2A)  | C(3A)  | -0.2(4)   |
| S(1)  | C(1) | C(11) | C(5)  | 83.9(3)  | S(1A) | C(1A) | C(11A) | C(5A)  | -12.9(4)  |
| S(1)  | C(1) | C(11) | C(12) | -45.0(3) | S(1A) | C(1A) | C(11A) | C(12A) | -139.6(3) |
| S(1B) | C(1) | C(2B) | C(4)  | -0.9(5)  | S(1C) | C(1A) | C(2C)  | C(4A)  | -0.1(4)   |
| S(1B) | C(1) | C(11) | C(5)  | -96.3(6) | S(1C) | C(1A) | C(11A) | C(5A)  | 174.0(2)  |
| S(1B) | C(1) | C(11) | C(12) | 134.8(5) | S(1C) | C(1A) | C(11A) | C(12A) | 47.2(3)   |

|                        |           |                            |           |
|------------------------|-----------|----------------------------|-----------|
| S(1B) C(3) C(4) C(2B)  | -3.8(9)   | S(1C) C(3A) C(4A) C(2C)    | -0.3(5)   |
| N(1) C(12) C(13) C(14) | 0.1(3)    | N(1A) C(12A) C(13A) C(14A) | 0.2(3)    |
| N(1) C(12) C(13) C(20) | 177.5(3)  | N(1A) C(12A) C(13A) C(20A) | -179.6(3) |
| C(1) S(1) C(4) C(3)    | -0.7(3)   | C(1A) S(1A) C(4A) C(3A)    | 2.6(4)    |
| C(1) S(1B) C(3) C(4)   | 3.3(8)    | C(1A) S(1C) C(3A) C(4A)    | 0.3(3)    |
| C(1) C(2) C(3) C(4)    | -0.4(5)   | C(1A) C(2A) C(3A) C(4A)    | 1.8(5)    |
| C(1) C(2B) C(4) C(3)   | 2.6(8)    | C(1A) C(2C) C(4A) C(3A)    | 0.2(5)    |
| C(1) C(11) C(12) N(1)  | 86.8(3)   | C(1A) C(11A) C(12A) N(1A)  | 38.2(4)   |
| C(1) C(11) C(12) C(13) | -88.9(3)  | C(1A) C(11A) C(12A) C(13A) | -148.1(3) |
| C(2) C(1) C(11) C(5)   | -93.6(4)  | C(2A) C(1A) C(11A) C(5A)   | 173.1(3)  |
| C(2) C(1) C(11) C(12)  | 137.5(3)  | C(2A) C(1A) C(11A) C(12A)  | 46.4(4)   |
| C(2) C(3) C(4) S(1)    | 0.7(4)    | C(2A) C(3A) C(4A) S(1A)    | -2.9(5)   |
| C(2B) C(1) C(11) C(5)  | 80.5(6)   | C(2C) C(1A) C(11A) C(5A)   | -11.9(5)  |
| C(2B) C(1) C(11) C(12) | -48.4(6)  | C(2C) C(1A) C(11A) C(12A)  | -138.6(4) |
| C(3) S(1B) C(1) C(2B)  | -1.1(4)   | C(3A) S(1C) C(1A) C(2C)    | -0.1(3)   |
| C(3) S(1B) C(1) C(11)  | 176.6(3)  | C(3A) S(1C) C(1A) C(11A)   | 175.2(3)  |
| C(4) S(1) C(1) C(2)    | 0.5(2)    | C(4A) S(1A) C(1A) C(2A)    | -1.2(3)   |
| C(4) S(1) C(1) C(11)   | -177.3(2) | C(4A) S(1A) C(1A) C(11A)   | -175.9(3) |
| C(5) C(6) C(7) C(8)    | 0.1(5)    | C(5A) C(6A) C(7A) C(8A)    | -1.6(5)   |
| C(5) C(11) C(12) N(1)  | -42.4(4)  | C(5A) C(11A) C(12A) N(1A)  | -89.0(3)  |
| C(5) C(11) C(12) C(13) | 141.9(3)  | C(5A) C(11A) C(12A) C(13A) | 84.7(4)   |
| C(6) C(5) C(10) C(9)   | -0.7(4)   | C(6A) C(5A) C(10A) C(9A)   | 0.8(4)    |
| C(6) C(5) C(11) C(1)   | 20.6(4)   | C(6A) C(5A) C(11A) C(1A)   | 79.3(4)   |
| C(6) C(5) C(11) C(12)  | 148.2(3)  | C(6A) C(5A) C(11A) C(12A)  | -153.2(3) |
| C(6) C(7) C(8) C(9)    | -1.0(5)   | C(6A) C(7A) C(8A) C(9A)    | 0.7(5)    |
| C(7) C(8) C(9) C(10)   | 1.1(5)    | C(7A) C(8A) C(9A) C(10A)   | 1.0(5)    |
| C(8) C(9) C(10) C(5)   | -0.2(5)   | C(8A) C(9A) C(10A) C(5A)   | -1.7(5)   |

|                         |           |                          |           |
|-------------------------|-----------|--------------------------|-----------|
| C(10) C(5) C(6) C(7)    | 0.8(4)    | C(10A)C(5A) C(6A) C(7A)  | 0.9(5)    |
| C(10) C(5) C(11) C(1)   | -164.3(3) | C(10A)C(5A) C(11A)C(1A)  | -101.4(3) |
| C(10) C(5) C(11) C(12)  | -36.7(4)  | C(10A)C(5A) C(11A)C(12A) | 26.1(4)   |
| C(11) C(1) C(2) C(3)    | 177.5(3)  | C(11A)C(1A) C(2A) C(3A)  | 174.5(3)  |
| C(11) C(1) C(2B)C(4)    | -178.1(4) | C(11A)C(1A) C(2C) C(4A)  | -174.9(4) |
| C(11) C(5) C(6) C(7)    | 176.0(3)  | C(11A)C(5A) C(6A) C(7A)  | -179.8(3) |
| C(11) C(5) C(10) C(9)   | -176.0(3) | C(11A)C(5A) C(10A)C(9A)  | -178.5(3) |
| C(11) C(12) C(13) C(14) | 176.3(3)  | C(11A)C(12A)C(13A)C(14A) | -174.2(3) |
| C(11) C(12) C(13) C(20) | -6.4(5)   | C(11A)C(12A)C(13A)C(20A) | 6.1(5)    |
| C(12) N(1) C(19) C(14)  | 2.1(3)    | C(12A)N(1A) C(19A)C(14A) | -1.0(3)   |
| C(12) N(1) C(19) C(18)  | -175.2(3) | C(12A)N(1A) C(19A)C(18A) | 179.7(3)  |
| C(12) C(13) C(14) C(15) | 179.1(3)  | C(12A)C(13A)C(14A)C(15A) | 178.5(3)  |
| C(12) C(13) C(14) C(19) | 1.1(3)    | C(12A)C(13A)C(14A)C(19A) | -0.8(3)   |
| C(13) C(14) C(15) C(16) | -177.1(3) | C(13A)C(14A)C(15A)C(16A) | -179.1(3) |
| C(13) C(14) C(19) N(1)  | -2.0(3)   | C(13A)C(14A)C(19A)N(1A)  | 1.1(3)    |
| C(13) C(14) C(19) C(18) | 175.6(3)  | C(13A)C(14A)C(19A)C(18A) | -179.6(3) |
| C(14) C(15) C(16) C(17) | 1.2(4)    | C(14A)C(15A)C(16A)C(17A) | -0.9(4)   |
| C(15) C(14) C(19) N(1)  | 179.7(3)  | C(15A)C(14A)C(19A)N(1A)  | -178.3(3) |
| C(15) C(14) C(19) C(18) | -2.8(4)   | C(15A)C(14A)C(19A)C(18A) | 1.0(4)    |
| C(15) C(16) C(17) C(18) | -1.3(5)   | C(15A)C(16A)C(17A)C(18A) | 0.8(5)    |
| C(16) C(17) C(18) C(19) | -0.6(4)   | C(16A)C(17A)C(18A)C(19A) | 0.3(5)    |
| C(17) C(18) C(19) N(1)  | 179.6(3)  | C(17A)C(18A)C(19A)N(1A)  | 178.0(3)  |
| C(17) C(18) C(19) C(14) | 2.6(4)    | C(17A)C(18A)C(19A)C(14A) | -1.2(4)   |
| C(19) N(1) C(12) C(11)  | -177.8(3) | C(19A)N(1A) C(12A)C(11A) | 175.3(3)  |
| C(19) N(1) C(12) C(13)  | -1.4(3)   | C(19A)N(1A) C(12A)C(13A) | 0.6(3)    |
| C(19) C(14) C(15) C(16) | 0.7(4)    | C(19A)C(14A)C(15A)C(16A) | 0.1(4)    |
| C(20) C(13) C(14) C(15) | 1.7(5)    | C(20A)C(13A)C(14A)C(15A) | -1.7(5)   |

C(20) C(13) C(14) C(19)      -176.3(3) C(20A)C(13A)C(14A)C(19A)      179.0(3)

**Table S7. Hydrogen Atom Coordinates ( $\text{\AA}\times 10^4$ ) and Isotropic Displacement Parameters ( $\text{\AA}^2\times 10^3$ ) for 3a**

| Atom   | <i>x</i> | <i>y</i> | <i>z</i> | U(eq) |
|--------|----------|----------|----------|-------|
| H(1)   | 6419     | 4801     | 8891     | 19    |
| H(2)   | 5414     | 2143     | 4021     | 29    |
| H(2B)  | 4015     | 4830     | 6638     | 26    |
| H(3A)  | 2873     | 2993     | 3048     | 32    |
| H(3B)  | 2773     | 3010     | 3066     | 32    |
| H(4A)  | 1914     | 4672     | 4543     | 26    |
| H(4B)  | 1963     | 4760     | 4649     | 26    |
| H(6)   | 3915     | 583      | 5819     | 22    |
| H(7)   | 3103     | -1702    | 6528     | 28    |
| H(8)   | 4851     | -1903    | 8326     | 28    |
| H(9)   | 7471     | 164      | 9381     | 25    |
| H(10)  | 8277     | 2455     | 8670     | 21    |
| H(11)  | 7587     | 2894     | 6219     | 17    |
| H(15)  | 11720    | 9239     | 8924     | 22    |
| H(16)  | 11846    | 10935    | 10844    | 25    |
| H(17)  | 9928     | 10068    | 11896    | 25    |
| H(18)  | 7748     | 7505     | 11031    | 22    |
| H(20A) | 10191    | 6869     | 6429     | 30    |
| H(20B) | 9641     | 4874     | 6099     | 30    |
| H(20C) | 11367    | 5978     | 7167     | 30    |
| H(1A)  | 4511     | 6693     | 4122     | 22    |



|        |       |       |       |    |
|--------|-------|-------|-------|----|
| H(2A)  | 1630  | 8361  | 3808  | 30 |
| H(2C)  | 232   | 3734  | 1390  | 44 |
| H(3AA) | -1210 | 6512  | 4079  | 44 |
| H(3AB) | -1275 | 6403  | 4057  | 44 |
| H(4AA) | -1960 | 3756  | 2693  | 43 |
| H(4AB) | -1952 | 3697  | 2618  | 43 |
| H(6A)  | 1162  | 5235  | -500  | 32 |
| H(7A)  | 1478  | 3058  | -1924 | 35 |
| H(8A)  | 3743  | 1960  | -1402 | 31 |
| H(9A)  | 5648  | 2988  | 540   | 30 |
| H(10A) | 5341  | 5057  | 2033  | 23 |
| H(11A) | 2520  | 7580  | 1368  | 21 |
| H(15A) | 9155  | 11579 | 3895  | 23 |
| H(16A) | 10962 | 11732 | 5782  | 26 |
| H(17A) | 10088 | 9972  | 6915  | 26 |
| H(18A) | 7383  | 7956  | 6164  | 23 |
| H(20D) | 5304  | 10978 | 1965  | 32 |
| H(20E) | 4890  | 9192  | 983   | 32 |
| H(20F) | 6837  | 10318 | 1640  | 32 |

**Table S8. Atomic Occupancy for 3a**

| <b>Atom</b> | <b>Occupancy</b> | <b>Atom</b> | <b>Occupancy</b> | <b>Atom</b> | <b>Occupancy</b> |
|-------------|------------------|-------------|------------------|-------------|------------------|
| S(1)        | 0.9              | S(1B)       | 0.1              | C(2)        | 0.9              |
| H(2)        | 0.9              | C(2B)       | 0.1              | H(2B)       | 0.1              |
| H(3A)       | 0.9              | H(3B)       | 0.1              | H(4A)       | 0.9              |
| H(4B)       | 0.1              | S(1A)       | 0.5              | S(1C)       | 0.5              |

|        |     |        |     |        |     |
|--------|-----|--------|-----|--------|-----|
| C(2A)  | 0.5 | H(2A)  | 0.5 | C(2C)  | 0.5 |
| H(2C)  | 0.5 | H(3AA) | 0.5 | H(3AB) | 0.5 |
| H(4AA) | 0.5 | H(4AB) | 0.5 |        |     |

**Table S9. Crystal data and structure refinement for 3p.**

|                                      |                                        |
|--------------------------------------|----------------------------------------|
| Identification code                  | <b>3p</b>                              |
| Empirical formula                    | C <sub>20</sub> H <sub>17</sub> NS     |
| Formula weight                       | 303.40                                 |
| Temperature/K                        | 100.01(10)                             |
| Crystal system                       | triclinic                              |
| Space group                          | P1                                     |
| a/Å                                  | 8.4366(4)                              |
| b/Å                                  | 8.5299(4)                              |
| c/Å                                  | 11.8199(6)                             |
| α/°                                  | 103.482(4)                             |
| β/°                                  | 103.756(4)                             |
| γ/°                                  | 102.858(4)                             |
| Volume/Å <sup>3</sup>                | 767.85(7)                              |
| Z                                    | 2                                      |
| ρ <sub>calc</sub> /g/cm <sup>3</sup> | 1.312                                  |
| μ/mm <sup>-1</sup>                   | 1.811                                  |
| F(000)                               | 320.0                                  |
| Crystal size/mm <sup>3</sup>         | 0.4 × 0.35 × 0.15                      |
| Radiation                            | CuKα (λ = 1.54184)                     |
| 2θ range for data collection/°       | 8.078 to 152.404                       |
| Index ranges                         | -10 ≤ h ≤ 7, -9 ≤ k ≤ 10, -14 ≤ l ≤ 14 |

|                                                |                                                                  |
|------------------------------------------------|------------------------------------------------------------------|
| Reflections collected                          | 4569                                                             |
| Independent reflections                        | 3400 [ $R_{\text{int}} = 0.0274$ , $R_{\text{sigma}} = 0.0261$ ] |
| Data/restraints/parameters                     | 3400/132/444                                                     |
| Goodness-of-fit on $F^2$                       | 1.042                                                            |
| Final R indexes [ $I \geq 2\sigma(I)$ ]        | $R_1 = 0.0367$ , $wR_2 = 0.0964$                                 |
| Final R indexes [all data]                     | $R_1 = 0.0371$ , $wR_2 = 0.0966$                                 |
| Largest diff. peak/hole / $e \text{ \AA}^{-3}$ | 0.48/-0.32                                                       |
| Flack parameter                                | 0.016(17)                                                        |

**Table S10. Fractional Atomic Coordinates ( $\times 10^4$ ) and Equivalent Isotropic Displacement Parameters ( $\text{\AA}^2 \times 10^3$ ) for 3p.  $U_{\text{eq}}$  is defined as 1/3 of the trace of the orthogonalised  $U_{ij}$  tensor.**

| Atom | $x$        | $y$        | $z$       | $U(\text{eq})$ |
|------|------------|------------|-----------|----------------|
| S1   | 3205.1(16) | 3129.4(15) | 3705.3(9) | 18.4(3)        |
| S2   | 2837(8)    | 4550(8)    | 4881(5)   | 17.8(12)       |
| N1   | 7275(3)    | 5330(3)    | 8740(2)   | 13.0(5)        |
| C1   | 6715(3)    | 3159(3)    | 6709(2)   | 11.1(5)        |
| C2   | 4898(9)    | 2672(11)   | 4531(6)   | 19.0(14)       |
| C3   | 5290(20)   | 3410(20)   | 5765(9)   | 11.3(10)       |
| C4   | 4270(20)   | 4480(30)   | 6030(9)   | 16.5(12)       |
| C5   | 3055(11)   | 4422(11)   | 5015(7)   | 19.4(14)       |
| C6   | 4260(80)   | 4490(100)  | 6100(30)  | 19(3)          |
| C7   | 4650(30)   | 2490(40)   | 4580(20)  | 18(3)          |
| C8   | 3410(30)   | 3100(30)   | 3997(19)  | 19(2)          |
| C9   | 5260(80)   | 3440(90)   | 5810(30)  | 18(3)          |
| C11  | 7724(3)    | 4794(3)    | 7692(2)   | 11.7(5)        |

|      |           |            |           |           |
|------|-----------|------------|-----------|-----------|
| C12  | 9109(3)   | 5999(3)    | 7699(3)   | 12.7(5)   |
| C13  | 9547(3)   | 7361(3)    | 8808(3)   | 12.4(5)   |
| C14  | 10847(4)  | 8905(3)    | 9340(3)   | 15.4(5)   |
| C15  | 10961(4)  | 9913(4)    | 10479(3)  | 18.4(6)   |
| C16  | 9837(4)   | 9386(4)    | 11115(3)  | 17.6(6)   |
| C17  | 8537(4)   | 7860(4)    | 10612(3)  | 15.3(5)   |
| C18  | 8407(3)   | 6880(3)    | 9452(3)   | 12.7(5)   |
| C19  | 10041(4)  | 5892(4)    | 6764(3)   | 17.1(6)   |
| C21  | 6099(3)   | 1711(3)    | 7213(2)   | 11.3(5)   |
| C22  | 4543(4)   | 468(3)     | 6594(3)   | 15.1(5)   |
| C23  | 4056(4)   | -900(4)    | 7035(3)   | 21.6(6)   |
| C24  | 5092(4)   | -1024(4)   | 8069(3)   | 21.4(6)   |
| C25  | 6668(4)   | 203(4)     | 8687(3)   | 18.0(6)   |
| C26  | 7156(4)   | 1558(4)    | 8256(3)   | 15.5(5)   |
| S1A  | -980.3(9) | 4655.7(10) | 2845.9(7) | 24.27(19) |
| N1A  | 5160(3)   | 7607(3)    | 3929(2)   | 13.3(5)   |
| C1A  | 3006(3)   | 6945(3)    | 1872(2)   | 12.7(5)   |
| C2A  | 506(4)    | 4761(4)    | 2061(3)   | 17.3(6)   |
| C3A  | 1595(3)   | 6364(4)    | 2414(3)   | 12.9(5)   |
| C4A  | 1200(4)   | 7494(4)    | 3330(3)   | 16.3(5)   |
| C5A  | -166(4)   | 6745(4)    | 3654(3)   | 20.3(6)   |
| C11A | 4660(3)   | 7984(3)    | 2849(2)   | 11.9(5)   |
| C12A | 5909(4)   | 9273(3)    | 2813(3)   | 12.7(5)   |
| C13A | 7283(4)   | 9732(3)    | 3920(3)   | 11.9(5)   |
| C14A | 8911(4)   | 10918(4)   | 4409(3)   | 15.8(6)   |
| C15A | 9943(4)   | 11027(3)   | 5536(3)   | 17.0(6)   |
| C16A | 9379(4)   | 9972(4)    | 6211(3)   | 15.9(5)   |

|      |         |          |          |         |
|------|---------|----------|----------|---------|
| C17A | 7782(4) | 8786(4)  | 5757(3)  | 15.4(5) |
| C18A | 6766(3) | 8667(3)  | 4613(3)  | 12.2(5) |
| C19A | 5835(4) | 10106(4) | 1816(3)  | 17.0(6) |
| C21A | 3240(3) | 5505(3)  | 954(3)   | 12.7(5) |
| C22A | 4557(4) | 4792(4)  | 1248(3)  | 14.9(5) |
| C23A | 4718(4) | 3465(4)  | 366(3)   | 18.5(6) |
| C24A | 3585(4) | 2876(4)  | -796(3)  | 21.8(6) |
| C25A | 2289(4) | 3569(4)  | -1094(3) | 25.2(7) |
| C26A | 2113(4) | 4883(4)  | -225(3)  | 21.0(6) |

**Table S11. Anisotropic Displacement Parameters ( $\text{\AA}^2 \times 10^3$ ) for 3p. The Anisotropic displacement factor exponent takes the form:  $-2\pi^2[\text{h}^2\text{a}^2\text{U}_{11}+2\text{hka}^*\text{b}^*\text{U}_{12}+\dots]$ .**

| Atom | $U_{11}$ | $U_{22}$ | $U_{33}$ | $U_{23}$ | $U_{13}$ | $U_{12}$ |
|------|----------|----------|----------|----------|----------|----------|
| S1   | 23.0(6)  | 15.2(4)  | 15.2(5)  | 3.4(4)   | 0.1(4)   | 9.3(4)   |
| S2   | 16(2)    | 16.6(18) | 21.3(17) | 8.1(12)  | 5.7(13)  | 3.8(14)  |
| N1   | 11.8(11) | 7.9(10)  | 19.1(11) | 2.7(9)   | 8.1(9)   | 0.5(8)   |
| C1   | 10.0(12) | 6.7(11)  | 17.7(12) | 3.4(10)  | 6.2(10)  | 2.8(9)   |
| C2   | 23(2)    | 19(3)    | 17.5(14) | 5.3(12)  | 4.1(12)  | 12(2)    |
| C3   | 9.9(15)  | 6.6(15)  | 17.0(14) | 5.1(11)  | 4.5(11)  | -0.4(12) |
| C4   | 16.7(16) | 13.3(17) | 20.9(15) | 4.6(14)  | 6.8(13)  | 6.4(13)  |
| C5   | 20(2)    | 16(2)    | 22.0(16) | 4.3(13)  | 5.3(12)  | 7.1(16)  |
| C6   | 19(4)    | 18(4)    | 21(2)    | 6.9(18)  | 5.9(17)  | 6(3)     |
| C7   | 18(4)    | 16(4)    | 20(3)    | 7.3(19)  | 6.4(18)  | 4(3)     |
| C8   | 19(3)    | 18(3)    | 22(3)    | 8.0(17)  | 6.3(18)  | 4(3)     |
| C9   | 18(4)    | 17(4)    | 20(3)    | 6.9(19)  | 5.7(18)  | 5(3)     |
| C11  | 10.5(12) | 9.3(12)  | 16.4(12) | 4.9(10)  | 4.5(10)  | 3.8(10)  |

|      |          |          |          |         |          |          |
|------|----------|----------|----------|---------|----------|----------|
| C12  | 10.7(12) | 8.6(12)  | 20.0(13) | 5.6(10) | 5.6(10)  | 2.9(10)  |
| C13  | 9.9(12)  | 9.3(12)  | 18.7(13) | 5.4(10) | 3.6(10)  | 4.0(10)  |
| C14  | 11.4(12) | 10.5(13) | 24.4(14) | 7.0(11) | 5.5(11)  | 1.4(10)  |
| C15  | 16.0(13) | 11.0(13) | 23.5(14) | 3.5(11) | 0.3(11)  | 2.6(10)  |
| C16  | 19.9(14) | 11.7(13) | 18.8(13) | 2.5(10) | 1.5(11)  | 6.6(11)  |
| C17  | 17.3(14) | 12.3(13) | 19.0(13) | 7.2(10) | 7.0(11)  | 5.2(11)  |
| C18  | 11.1(12) | 8.2(12)  | 18.8(13) | 6.0(10) | 3.1(10)  | 2.7(10)  |
| C19  | 16.6(14) | 12.1(13) | 24.3(14) | 6.1(11) | 11.3(11) | 1.7(10)  |
| C21  | 11.9(12) | 5.8(11)  | 18.4(12) | 2.1(9)  | 9.5(10)  | 3.5(9)   |
| C22  | 12.8(13) | 10.4(12) | 20.6(13) | 3.6(10) | 5.3(11)  | 1.2(10)  |
| C23  | 19.4(15) | 9.0(13)  | 33.4(16) | 4.1(12) | 11.5(13) | -3.0(11) |
| C24  | 30.4(17) | 8.2(12)  | 32.4(16) | 8.2(11) | 20.2(14) | 5.0(12)  |
| C25  | 23.9(15) | 15.6(14) | 19.9(13) | 8.9(11) | 8.3(12)  | 10.7(11) |
| C26  | 14.9(13) | 10.8(12) | 21.9(13) | 3.5(10) | 8.2(11)  | 4.4(10)  |
| S1A  | 15.2(3)  | 24.7(4)  | 34.5(4)  | 12.5(3) | 8.9(3)   | 3.9(3)   |
| N1A  | 10.0(11) | 11.6(10) | 18.6(11) | 5.6(9)  | 5.0(9)   | 2.0(8)   |
| C1A  | 11.6(13) | 9.1(12)  | 16.4(12) | 2.7(10) | 3.5(10)  | 3.2(10)  |
| C2A  | 12.9(13) | 14.9(13) | 23.7(14) | 7.4(11) | 3.5(11)  | 4.0(11)  |
| C3A  | 10.7(12) | 13.2(12) | 16.2(12) | 5.0(10) | 3.5(10)  | 6.2(10)  |
| C4A  | 17.0(13) | 15.8(13) | 16.2(12) | 4.0(11) | 3.0(10)  | 8.2(11)  |
| C5A  | 22.1(15) | 27.0(16) | 19.1(13) | 8.2(12) | 7.9(11)  | 18.0(13) |
| C11A | 10.3(12) | 9.1(12)  | 16.3(13) | 1.4(10) | 5.2(10)  | 4.4(10)  |
| C12A | 14.6(13) | 7.8(11)  | 16.9(12) | 2.2(9)  | 6.7(10)  | 5.1(10)  |
| C13A | 13.9(13) | 7.1(12)  | 17.6(12) | 3.5(10) | 8.5(10)  | 5.2(10)  |
| C14A | 16.4(13) | 9.2(12)  | 23.0(14) | 3.6(10) | 9.4(11)  | 3.5(10)  |
| C15A | 12.4(13) | 10.0(12) | 25.0(14) | 0.9(11) | 5.7(11)  | 0.8(10)  |
| C16A | 14.6(13) | 14.3(13) | 16.6(12) | 2.3(10) | 2.3(11)  | 5.1(10)  |

|      |          |          |          |          |          |          |
|------|----------|----------|----------|----------|----------|----------|
| C17A | 15.7(13) | 12.7(13) | 18.5(13) | 3.3(10)  | 7.7(11)  | 4.0(11)  |
| C18A | 11.5(12) | 7.5(12)  | 19.0(13) | 2.3(10)  | 8.1(10)  | 3.4(10)  |
| C19A | 18.4(14) | 14.4(13) | 21.1(13) | 9.3(11)  | 7.3(11)  | 4.9(11)  |
| C21A | 13.4(12) | 7.8(12)  | 19.2(13) | 4.2(10)  | 8.5(10)  | 3.6(10)  |
| C22A | 13.3(13) | 14.7(13) | 18.2(13) | 5.4(10)  | 6.0(10)  | 4.9(10)  |
| C23A | 18.3(13) | 14.0(13) | 31.5(15) | 10.3(11) | 14.8(12) | 9.6(11)  |
| C24A | 26.3(16) | 11.8(13) | 28.0(15) | 0.8(11)  | 19.9(13) | 0.0(12)  |
| C25A | 32.4(18) | 17.2(14) | 15.3(13) | 0.5(11)  | 0.6(12)  | -2.1(13) |
| C26A | 22.8(15) | 15.3(14) | 22.5(14) | 3.8(11)  | 2.0(12)  | 8.1(12)  |

**Table S12. Bond Lengths for 3p.**

| Atom | Atom | Length/Å  | Atom | Atom | Length/Å |
|------|------|-----------|------|------|----------|
| S1   | C2   | 1.705(6)  | C23  | C24  | 1.365(5) |
| S1   | C5   | 1.729(8)  | C24  | C25  | 1.400(5) |
| S2   | C6   | 1.66(3)   | C25  | C26  | 1.388(4) |
| S2   | C8   | 1.66(2)   | S1A  | C2A  | 1.727(3) |
| N1   | C11  | 1.387(4)  | S1A  | C5A  | 1.705(3) |
| N1   | C18  | 1.380(3)  | N1A  | C11A | 1.382(4) |
| C1   | C3   | 1.526(6)  | N1A  | C18A | 1.379(4) |
| C1   | C9   | 1.526(18) | C1A  | C3A  | 1.523(4) |
| C1   | C11  | 1.505(4)  | C1A  | C11A | 1.507(4) |
| C1   | C21  | 1.535(3)  | C1A  | C21A | 1.522(4) |
| C2   | C3   | 1.373(9)  | C2A  | C3A  | 1.371(4) |
| C3   | C4   | 1.417(9)  | C3A  | C4A  | 1.429(4) |
| C4   | C5   | 1.364(10) | C4A  | C5A  | 1.371(4) |
| C6   | C9   | 1.40(3)   | C11A | C12A | 1.359(4) |
| C7   | C8   | 1.39(3)   | C12A | C13A | 1.430(4) |

|     |     |          |      |      |          |
|-----|-----|----------|------|------|----------|
| C7  | C9  | 1.39(3)  | C12A | C19A | 1.507(4) |
| C11 | C12 | 1.371(4) | C13A | C14A | 1.405(4) |
| C12 | C13 | 1.440(4) | C13A | C18A | 1.424(4) |
| C12 | C19 | 1.499(4) | C14A | C15A | 1.376(4) |
| C13 | C14 | 1.406(4) | C15A | C16A | 1.414(4) |
| C13 | C18 | 1.412(4) | C16A | C17A | 1.387(4) |
| C14 | C15 | 1.388(4) | C17A | C18A | 1.385(4) |
| C15 | C16 | 1.405(4) | C21A | C22A | 1.393(4) |
| C16 | C17 | 1.394(4) | C21A | C26A | 1.388(4) |
| C17 | C18 | 1.395(4) | C22A | C23A | 1.404(4) |
| C21 | C22 | 1.394(4) | C23A | C24A | 1.376(5) |
| C21 | C26 | 1.392(4) | C24A | C25A | 1.368(5) |
| C22 | C23 | 1.405(4) | C25A | C26A | 1.394(5) |

**Table S13. Bond Angles for 3p.**

| Atom | Atom | Atom | Angle/°  | Atom    | Atom | Atom | Angle/°   |
|------|------|------|----------|---------|------|------|-----------|
| C2   | S1   | C5   | 91.3(4)  | C24     | C23  | C22  | 120.6(3)  |
| C8   | S2   | C6   | 90(2)    | C23     | C24  | C25  | 119.9(3)  |
| C18  | N1   | C11  | 109.0(2) | C26     | C25  | C24  | 119.8(3)  |
| C3   | C1   | C21  | 113.5(9) | C25     | C26  | C21  | 120.8(3)  |
| C9   | C1   | C21  | 113(4)   | C5A     | S1A  | C2A  | 92.78(15) |
| C11  | C1   | C3   | 111.0(6) | C18AN1A | C11A |      | 109.1(2)  |
| C11  | C1   | C9   | 110(2)   | C11A    | C1A  | C3A  | 111.9(2)  |
| C11  | C1   | C21  | 113.3(2) | C11A    | C1A  | C21A | 112.1(2)  |
| C3   | C2   | S1   | 112.5(5) | C21A    | C1A  | C3A  | 112.9(2)  |
| C2   | C3   | C1   | 123.0(8) | C3A     | C2A  | S1A  | 111.1(2)  |



|     |     |     |           |                |          |
|-----|-----|-----|-----------|----------------|----------|
| C2  | C3  | C4  | 111.7(6)  | C2A C3A C1A    | 125.7(3) |
| C4  | C3  | C1  | 125.2(7)  | C2A C3A C4A    | 111.7(3) |
| C5  | C4  | C3  | 112.8(8)  | C4A C3A C1A    | 122.5(2) |
| C4  | C5  | S1  | 111.5(8)  | C5A C4A C3A    | 113.6(3) |
| C9  | C6  | S2  | 113(2)    | C4A C5A S1A    | 110.8(2) |
| C8  | C7  | C9  | 107(2)    | N1A C11A C1A   | 121.1(2) |
| C7  | C8  | S2  | 116.7(17) | C12A C11A N1A  | 109.9(2) |
| C6  | C9  | C1  | 126(2)    | C12A C11A C1A  | 128.8(3) |
| C7  | C9  | C1  | 122(3)    | C11A C12A C13A | 107.2(2) |
| C7  | C9  | C6  | 112(2)    | C11A C12A C19A | 126.5(3) |
| N1  | C11 | C1  | 122.2(2)  | C13A C12A C19A | 126.3(3) |
| C12 | C11 | N1  | 109.6(2)  | C14A C13A C12A | 134.8(3) |
| C12 | C11 | C1  | 128.1(3)  | C14A C13A C18A | 118.2(3) |
| C11 | C12 | C13 | 106.8(2)  | C18A C13A C12A | 107.0(2) |
| C11 | C12 | C19 | 126.8(3)  | C15A C14A C13A | 119.6(3) |
| C13 | C12 | C19 | 126.4(2)  | C14A C15A C16A | 120.8(3) |
| C14 | C13 | C12 | 133.7(3)  | C17A C16A C15A | 121.2(3) |
| C14 | C13 | C18 | 119.0(3)  | C18A C17A C16A | 117.5(3) |
| C18 | C13 | C12 | 107.2(2)  | N1A C18A C13A  | 106.9(2) |
| C15 | C14 | C13 | 118.9(3)  | N1A C18A C17A  | 130.4(2) |
| C14 | C15 | C16 | 120.9(3)  | C17A C18A C13A | 122.7(2) |
| C17 | C16 | C15 | 121.5(3)  | C22A C21A C1A  | 122.4(2) |
| C16 | C17 | C18 | 117.0(3)  | C26A C21A C1A  | 119.1(3) |
| N1  | C18 | C13 | 107.5(2)  | C26A C21A C22A | 118.5(3) |
| N1  | C18 | C17 | 129.9(3)  | C21A C22A C23A | 120.2(3) |
| C17 | C18 | C13 | 122.6(3)  | C24A C23A C22A | 120.1(3) |
| C22 | C21 | C1  | 121.1(2)  | C25A C24A C23A | 120.2(3) |

|     |     |     |          |                |          |
|-----|-----|-----|----------|----------------|----------|
| C26 | C21 | C1  | 119.8(2) | C24A C25A C26A | 120.2(3) |
| C26 | C21 | C22 | 118.9(2) | C21A C26A C25A | 120.8(3) |
| C21 | C22 | C23 | 120.0(3) |                |          |

**Table S14. Torsion Angles for 3p.**

| A  | B   | C   | D   | Angle/°    | A   | B    | C    | D    | Angle/°   |
|----|-----|-----|-----|------------|-----|------|------|------|-----------|
| S1 | C2  | C3  | C1  | 177.9(13)  | C21 | C1   | C11  | C12  | 143.6(3)  |
| S1 | C2  | C3  | C4  | -5(2)      | C21 | C22  | C23  | C24  | 0.1(5)    |
| S2 | C6  | C9  | C1  | 178(6)     | C22 | C21  | C26  | C25  | -0.8(4)   |
| S2 | C6  | C9  | C7  | -9(9)      | C22 | C23  | C24  | C25  | -1.1(5)   |
| N1 | C11 | C12 | C13 | -0.1(3)    | C23 | C24  | C25  | C26  | 1.1(5)    |
| N1 | C11 | C12 | C19 | 177.3(3)   | C24 | C25  | C26  | C21  | -0.2(4)   |
| C1 | C3  | C4  | C5  | -177.8(17) | C26 | C21  | C22  | C23  | 0.8(4)    |
| C1 | C11 | C12 | C13 | 176.7(3)   | S1A | C2A  | C3A  | C1A  | -176.7(2) |
| C1 | C11 | C12 | C19 | -5.8(5)    | S1A | C2A  | C3A  | C4A  | 0.1(3)    |
| C1 | C21 | C22 | C23 | 176.1(3)   | N1A | C11A | C12A | C13A | 0.6(3)    |
| C1 | C21 | C26 | C25 | -176.1(2)  | N1A | C11A | C12A | C19A | -177.4(2) |
| C2 | S1  | C5  | C4  | 0.1(14)    | C1A | C3A  | C4A  | C5A  | 176.9(3)  |
| C2 | C3  | C4  | C5  | 5(3)       | C1A | C11A | C12A | C13A | -174.5(3) |
| C3 | C1  | C11 | N1  | 89.1(9)    | C1A | C11A | C12A | C19A | 7.5(5)    |
| C3 | C1  | C11 | C12 | -87.4(9)   | C1A | C21A | C22A | C23A | -179.9(2) |
| C3 | C1  | C21 | C22 | 18.6(6)    | C1A | C21A | C26A | C25A | 179.7(3)  |
| C3 | C1  | C21 | C26 | -166.2(5)  | C2A | S1A  | C5A  | C4A  | 0.0(2)    |
| C3 | C4  | C5  | S1  | -3(2)      | C2A | C3A  | C4A  | C5A  | -0.1(3)   |
| C5 | S1  | C2  | C3  | 2.6(12)    | C3A | C1A  | C11A | N1A  | 36.9(3)   |
| C6 | S2  | C8  | C7  | 2(4)       | C3A | C1A  | C11A | C12A | -148.5(3) |

|              |            |                     |           |
|--------------|------------|---------------------|-----------|
| C8 S2 C6 C9  | 4(7)       | C3A C1A C21A C22A   | -101.7(3) |
| C8 C7 C9 C1  | -177(6)    | C3A C1A C21A C26A   | 78.9(3)   |
| C8 C7 C9 C6  | 10(8)      | C3A C4A C5A S1A     | 0.0(3)    |
| C9 C1 C11N1  | 87(3)      | C5A S1A C2A C3A     | -0.1(2)   |
| C9 C1 C11C12 | -90(3)     | C11AN1A C18A C13A   | -0.6(3)   |
| C9 C1 C21C22 | 20.9(17)   | C11AN1A C18A C17A   | 179.1(3)  |
| C9 C1 C21C26 | -163.8(17) | C11AC1A C3A C2A     | -133.6(3) |
| C9 C7 C8 S2  | -7(5)      | C11AC1A C3A C4A     | 49.8(3)   |
| C11N1 C18C13 | 2.6(3)     | C11AC1A C21A C22A   | 25.9(4)   |
| C11N1 C18C17 | -175.5(3)  | C11AC1A C21A C26A   | -153.5(3) |
| C11C1 C3 C2  | 138.0(15)  | C11AC12A C13A C14A  | 178.5(3)  |
| C11C1 C3 C4  | -39(2)     | C11AC12A C13A C18A  | -1.0(3)   |
| C11C1 C9 C6  | -38(9)     | C12A C13A C14A C15A | -179.9(3) |
| C11C1 C9 C7  | 149(6)     | C12A C13A C18A N1A  | 0.9(3)    |
| C11C1 C21C22 | 146.3(3)   | C12A C13A C18A C17A | -178.8(3) |
| C11C1 C21C26 | -38.5(3)   | C13A C14A C15A C16A | -0.6(4)   |
| C11C12C13C14 | 178.1(3)   | C14A C13A C18A N1A  | -178.6(2) |
| C11C12C13C18 | 1.7(3)     | C14A C13A C18A C17A | 1.7(4)    |
| C12C13C14C15 | -176.5(3)  | C14A C15A C16A C17A | 0.7(4)    |
| C12C13C18N1  | -2.7(3)    | C15A C16A C17A C18A | 0.4(4)    |
| C12C13C18C17 | 175.7(3)   | C16A C17A C18A N1A  | 178.8(3)  |
| C13C14C15C16 | 2.0(4)     | C16A C17A C18A C13A | -1.6(4)   |
| C14C13C18N1  | -179.7(2)  | C18AN1A C11A C1A    | 175.5(2)  |
| C14C13C18C17 | -1.4(4)    | C18AN1A C11A C12A   | 0.0(3)    |
| C14C15C16C17 | -1.9(4)    | C18A C13A C14A C15A | -0.5(4)   |
| C15C16C17C18 | 0.2(4)     | C19A C12A C13A C14A | -3.5(5)   |
| C16C17C18N1  | 179.4(3)   | C19A C12A C13A C18A | 177.0(3)  |

|              |           |                  |          |
|--------------|-----------|------------------|----------|
| C16C17C18C13 | 1.5(4)    | C21AC1A C3A C2A  | -6.0(4)  |
| C18N1 C11C1  | -178.6(2) | C21AC1A C3A C4A  | 177.5(3) |
| C18N1 C11C12 | -1.6(3)   | C21AC1A C11AN1A  | -91.2(3) |
| C18C13C14C15 | -0.4(4)   | C21AC1A C11AC12A | 83.4(3)  |
| C19C12C13C14 | 0.7(5)    | C21AC22AC23AC24A | 0.6(4)   |
| C19C12C13C18 | -175.8(3) | C22AC21AC26AC25A | 0.3(4)   |
| C21C1 C3 C2  | -93.1(18) | C22AC23AC24AC25A | -0.5(4)  |
| C21C1 C3 C4  | 90(2)     | C23AC24AC25AC26A | 0.3(5)   |
| C21C1 C9 C6  | 89(8)     | C24AC25AC26AC21A | -0.2(5)  |
| C21C1 C9 C7  | -84(7)    | C26AC21AC22AC23A | -0.5(4)  |
| C21C1 C11N1  | -39.9(3)  |                  |          |

**Table S15. Hydrogen Atom Coordinates ( $\text{\AA}\times 10^4$ ) and Isotropic Displacement Parameters ( $\text{\AA}^2\times 10^3$ ) for 3p.**

| Atom | <i>x</i> | <i>y</i> | <i>z</i> | U(eq) |
|------|----------|----------|----------|-------|
| H1   | 6409     | 4772     | 8922     | 16    |
| H1A  | 7521     | 2823     | 6269     | 13    |
| H1B  | 7500     | 2825     | 6247     | 13    |
| H2   | 5502     | 1981     | 4176     | 23    |
| H4   | 4420     | 5163     | 6830     | 20    |
| H5   | 2229     | 5018     | 5027     | 23    |
| H6   | 4388     | 5101     | 6916     | 23    |
| H7   | 5026     | 1581     | 4208     | 21    |
| H8   | 2913     | 2715     | 3134     | 23    |
| H14  | 11635    | 9252     | 8926     | 19    |
| H15  | 11812    | 10976    | 10835    | 22    |

|      |       |       |       |    |
|------|-------|-------|-------|----|
| H16  | 9965  | 10084 | 11904 | 21 |
| H17  | 7775  | 7505  | 11041 | 18 |
| H19A | 10053 | 6851  | 6440  | 26 |
| H19B | 9462  | 4838  | 6096  | 26 |
| H19C | 11216 | 5916  | 7144  | 26 |
| H22  | 3813  | 547   | 5874  | 18 |
| H23  | 2996  | -1745 | 6609  | 26 |
| H24  | 4743  | -1943 | 8369  | 26 |
| H25  | 7401  | 109   | 9398  | 22 |
| H26  | 8225  | 2390  | 8678  | 19 |
| H1AA | 4550  | 6815  | 4146  | 16 |
| H1AB | 2635  | 7711  | 1409  | 15 |
| H2A  | 561   | 3831  | 1463  | 21 |
| H4A  | 1824  | 8655  | 3682  | 20 |
| H5A  | -600  | 7311  | 4248  | 24 |
| H14A | 9297  | 11639 | 3965  | 19 |
| H15A | 11048 | 11821 | 5863  | 20 |
| H16A | 10108 | 10077 | 6991  | 19 |
| H17A | 7399  | 8082  | 6212  | 19 |
| H19D | 5662  | 11212 | 2097  | 25 |
| H19E | 4886  | 9398  | 1089  | 25 |
| H19F | 6910  | 10249 | 1615  | 25 |
| H22A | 5348  | 5204  | 2047  | 18 |
| H23A | 5611  | 2974  | 572   | 22 |
| H24A | 3702  | 1984  | -1393 | 26 |
| H25A | 1506  | 3154  | -1897 | 30 |
| H26A | 1212  | 5359  | -442  | 25 |

**Table S16. Atomic Occupancy for 3p.**

| <b>Atom</b> | <b>Occupancy</b> | <b>Atom</b> | <b>Occupancy</b> | <b>Atom</b> | <b>Occupancy</b> |
|-------------|------------------|-------------|------------------|-------------|------------------|
| S1          | 0.77             | S2          | 0.23             | H1A         | 0.77             |
| H1B         | 0.23             | C2          | 0.77             | H2          | 0.77             |
| C3          | 0.77             | C4          | 0.77             | H4          | 0.77             |
| C5          | 0.77             | H5          | 0.77             | C6          | 0.23             |
| H6          | 0.23             | C7          | 0.23             | H7          | 0.23             |
| C8          | 0.23             | H8          | 0.23             | C9          | 0.23             |

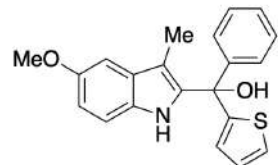

**1b**

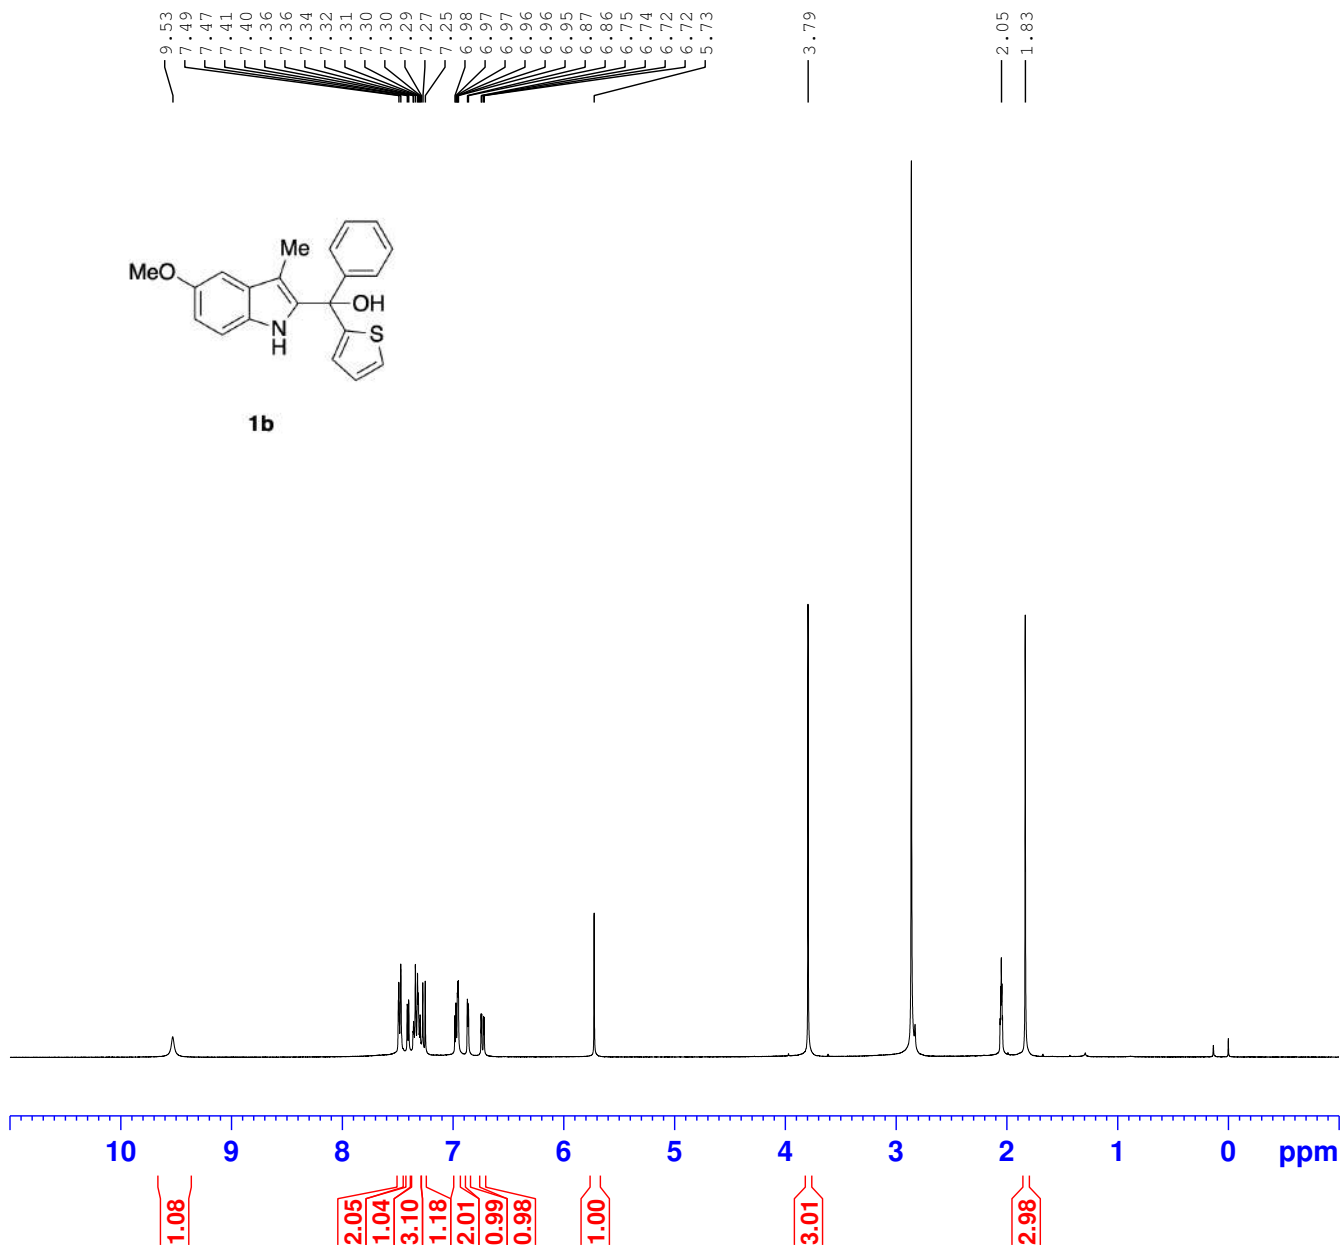

Current Data Parameters  
NAME YQL-2-3-S  
EXPNO 1  
PROCNO 1

F2 - Acquisition Parameters  
Date\_ 20210806  
Time 22.08  
INSTRUM spect  
PROBHD 5 mm PABBO BB/  
PULPROG zg30  
TD 65536  
SOLVENT Acetone  
NS 8  
DS 0  
SWH 8012.820 Hz  
FIDRES 0.122266 Hz  
AQ 4.0894465 sec  
RG 126.97  
DW 62.400 usec  
DE 6.50 usec  
TE 298.7 K  
D1 1.00000000 sec  
TD0 1

==== CHANNEL f1 =====  
SFO1 400.1324710 MHz  
NUC1 1H  
P1 14.50 usec  
PLW1 11.99499989 W

F2 - Processing parameters  
SI 65536  
SF 400.1300073 MHz  
WDW EM  
SSB 0  
LB 0.30 Hz  
GB 0  
PC 1.00

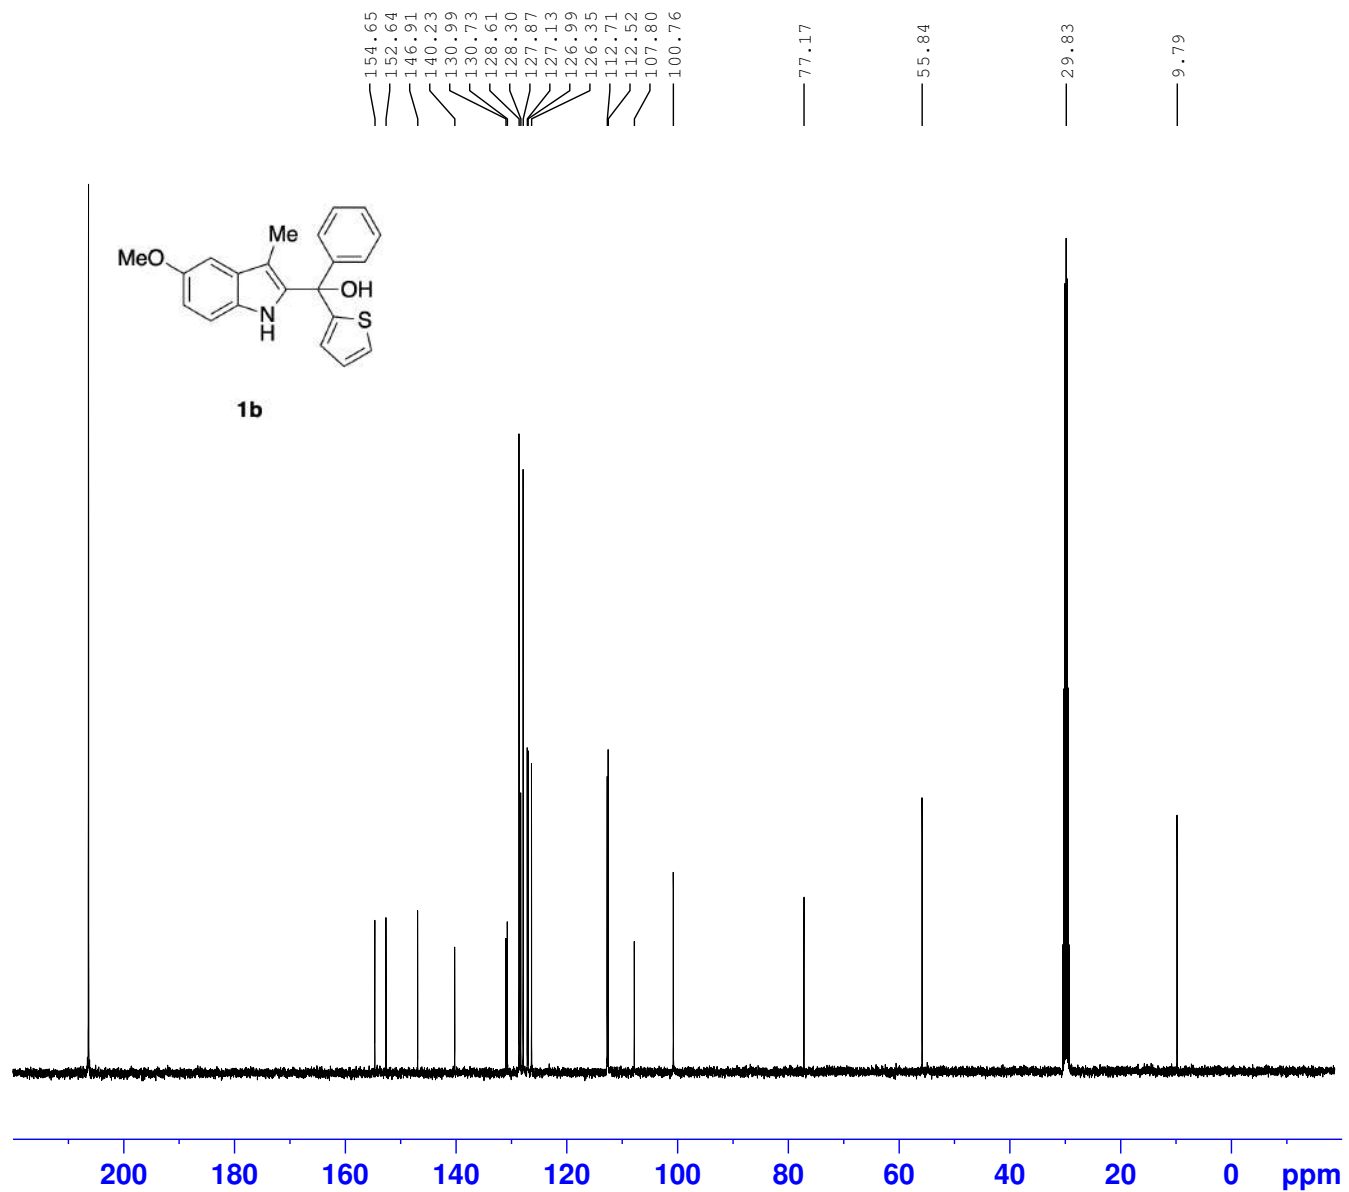

Current Data Parameters  
 NAME YQL-1-182  
 EXPNO 3  
 PROCNO 1

F2 - Acquisition Parameters  
 Date\_ 20210721  
 Time 22.42  
 INSTRUM spect  
 PROBHD 5 mm PABBO BB/  
 PULPROG zgpg30  
 TD 65536  
 SOLVENT Acetone  
 NS 51  
 DS 2  
 SWH 24038.461 Hz  
 FIDRES 0.366798 Hz  
 AQ 1.3631488 sec  
 RG 196.92  
 DW 20.800 usec  
 DE 6.50 usec  
 TE 297.0 K  
 D1 2.0000000 sec  
 D11 0.03000000 sec  
 TD0 1

==== CHANNEL f1 =====  
 SFO1 100.6228298 MHz  
 NUC1 13C  
 P1 9.70 usec  
 PLW1 46.98899841 W

==== CHANNEL f2 =====  
 SFO2 400.1316005 MHz  
 NUC2 1H  
 CPDPRG[2] waltz16  
 PCPD2 90.00 usec  
 PLW2 11.99499989 W  
 PLW12 0.34213999 W  
 PLW13 0.27713001 W

F2 - Processing parameters  
 SI 32768  
 SF 100.6126909 MHz  
 WDW EM  
 SSB 0  
 LB 1.00 Hz  
 GB 0  
 PC 1.40



7.49  
7.47  
7.42  
7.41  
7.41  
7.40  
7.39  
7.38  
7.33  
7.31  
7.31  
7.30  
7.29  
7.21  
7.20  
7.20  
7.18  
7.18  
7.17  
7.17  
7.16  
7.15  
7.15  
7.14  
7.14  
7.14  
7.13  
7.12  
7.11  
7.11  
7.10  
7.05  
7.04  
7.03  
7.01  
7.01  
6.84  
6.83  
6.83  
6.82  
6.81  
6.81  
6.80  
6.80  
5.85

2.05

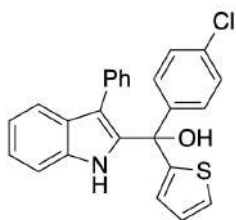

1h

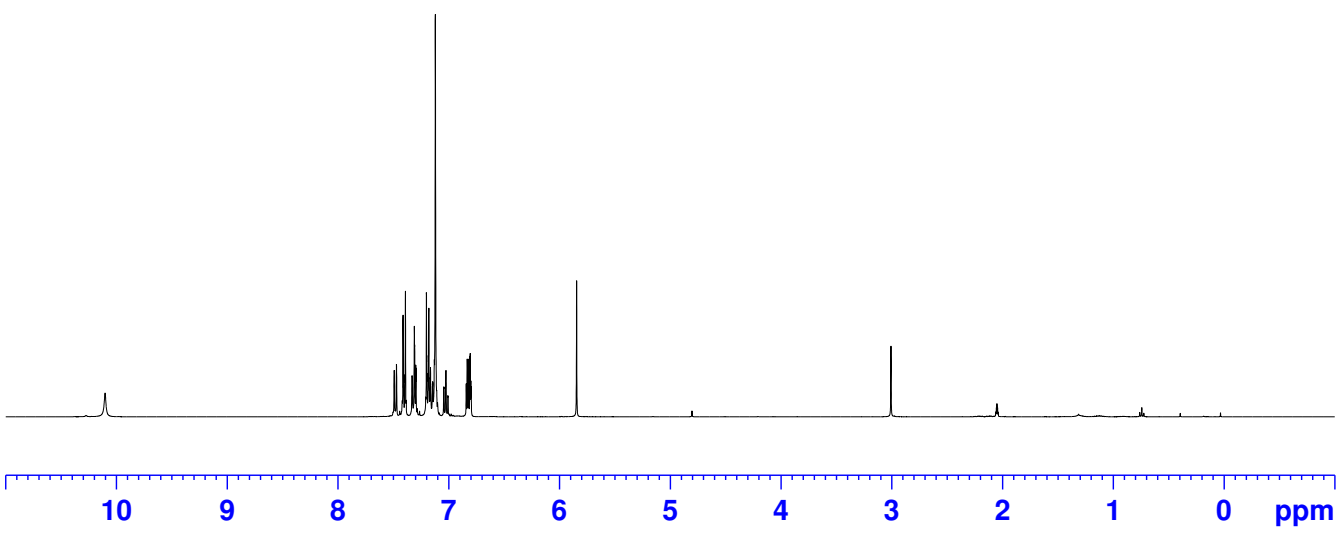

0.94  
1.05  
2.02  
2.09  
3.07  
5.04  
0.99  
2.00  
0.97

Current Data Parameters  
NAME YQL-1-167-  
EXPNO 1  
PROCNO 1

F2 - Acquisition Parameters  
Date\_ 20210806  
Time 14.40  
INSTRUM spect  
PROBHD 5 mm DUL 13C-1  
PULPROG zg30  
TD 65536  
SOLVENT Acetone  
NS 8  
DS 0  
SWH 8223.685 Hz  
FIDRES 0.125483 Hz  
AQ 3.9845889 sec  
RG 101  
DW 60.800 usec  
DE 6.00 usec  
TE 293.3 K  
D1 1.0000000 sec  
TD0 1

==== CHANNEL f1 =====  
NUC1 1H  
P1 15.80 usec  
PL1 -1.00 dB  
PL1W 12.17476940 W  
SFO1 400.1324710 MHz

F2 - Processing parameters  
SI 32768  
SF 400.1300069 MHz  
WDW EM  
SSB 0  
LB 0.30 Hz  
GB 0  
PC 1.00

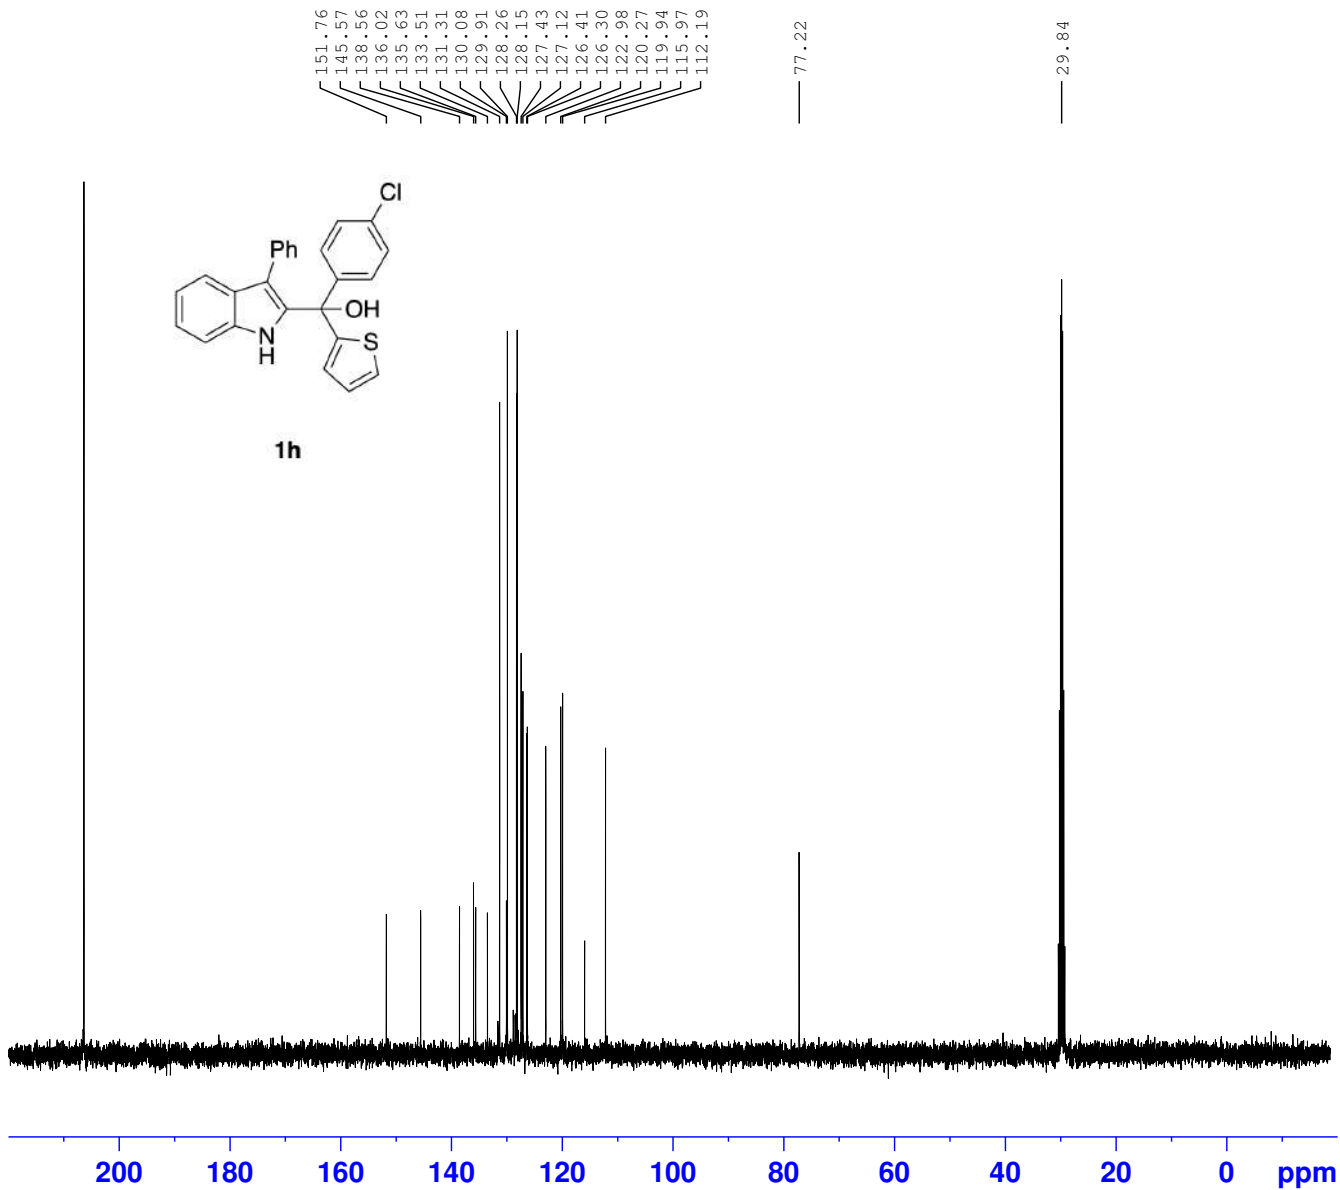

Current Data Parameters  
 NAME YQL-1-167-  
 EXPNO 2  
 PROCNO 1

F2 - Acquisition Parameters  
 Date\_ 20210806  
 Time 14.44  
 INSTRUM spect  
 PROBHD 5 mm DUL 13C-1  
 PULPROG zgpg30  
 TD 65536  
 SOLVENT Acetone  
 NS 62  
 DS 1  
 SWH 24038.461 Hz  
 FIDRES 0.366798 Hz  
 AQ 1.3631488 sec  
 RG 2050  
 DW 20.800 usec  
 DE 6.00 usec  
 TE 293.6 K  
 D1 2.00000000 sec  
 D11 0.03000000 sec  
 TD0 1

==== CHANNEL f1 =====  
 NUC1 13C  
 P1 40.00 usec  
 PL1 -3.00 dB  
 PL1W 60.64365387 W  
 SFO1 100.6228298 MHz

==== CHANNEL f2 =====  
 CPDPRG[2] waltz16  
 NUC2 1H  
 PCPD2 80.00 usec  
 PL2 -1.00 dB  
 PL12 14.39 dB  
 PL13 18.00 dB  
 PL2W 12.17476940 W  
 PL12W 0.35193357 W  
 PL13W 0.15327126 W  
 SFO2 400.1316005 MHz

F2 - Processing parameters  
 SI 32768  
 SF 100.6126939 MHz  
 WDW EM  
 SSB 0  
 LB 1.00 Hz  
 GB 0  
 PC 1.40

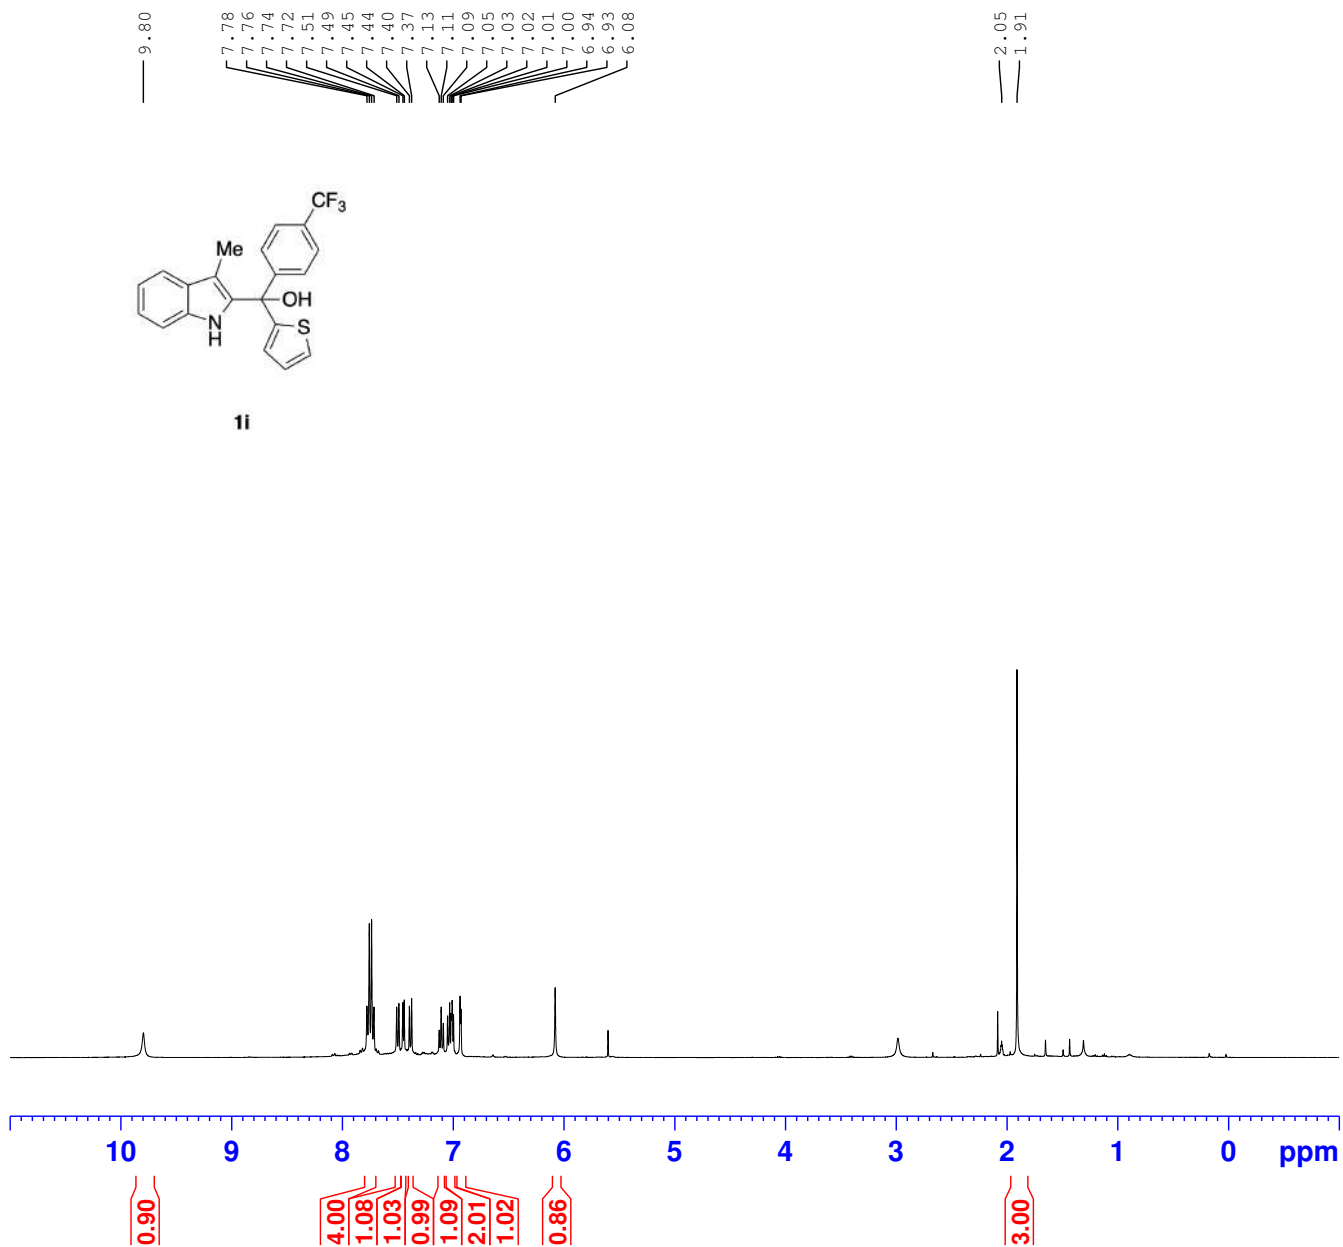

Current Data Parameters  
 NAME YQL-1-163-A  
 EXPNO 1  
 PROCNO 1

F2 - Acquisition Parameters  
 Date\_ 20210710  
 Time 22.10  
 INSTRUM spect  
 PROBHD 5 mm PABBO BB/  
 PULPROG zg30  
 TD 65536  
 SOLVENT Acetone  
 NS 8  
 DS 0  
 SWH 8012.820 Hz  
 FIDRES 0.122266 Hz  
 AQ 4.0894465 sec  
 RG 31.55  
 DW 62.400 usec  
 DE 6.50 usec  
 TE 296.4 K  
 D1 1.00000000 sec  
 TD0 1

==== CHANNEL f1 =====  
 SFO1 400.1324710 MHz  
 NUC1 1H  
 P1 14.50 usec  
 PLW1 11.99499989 W

F2 - Processing parameters  
 SI 65536  
 SF 400.1300076 MHz  
 WDW EM  
 SSB 0  
 LB 0.30 Hz  
 GB 0  
 PC 1.00

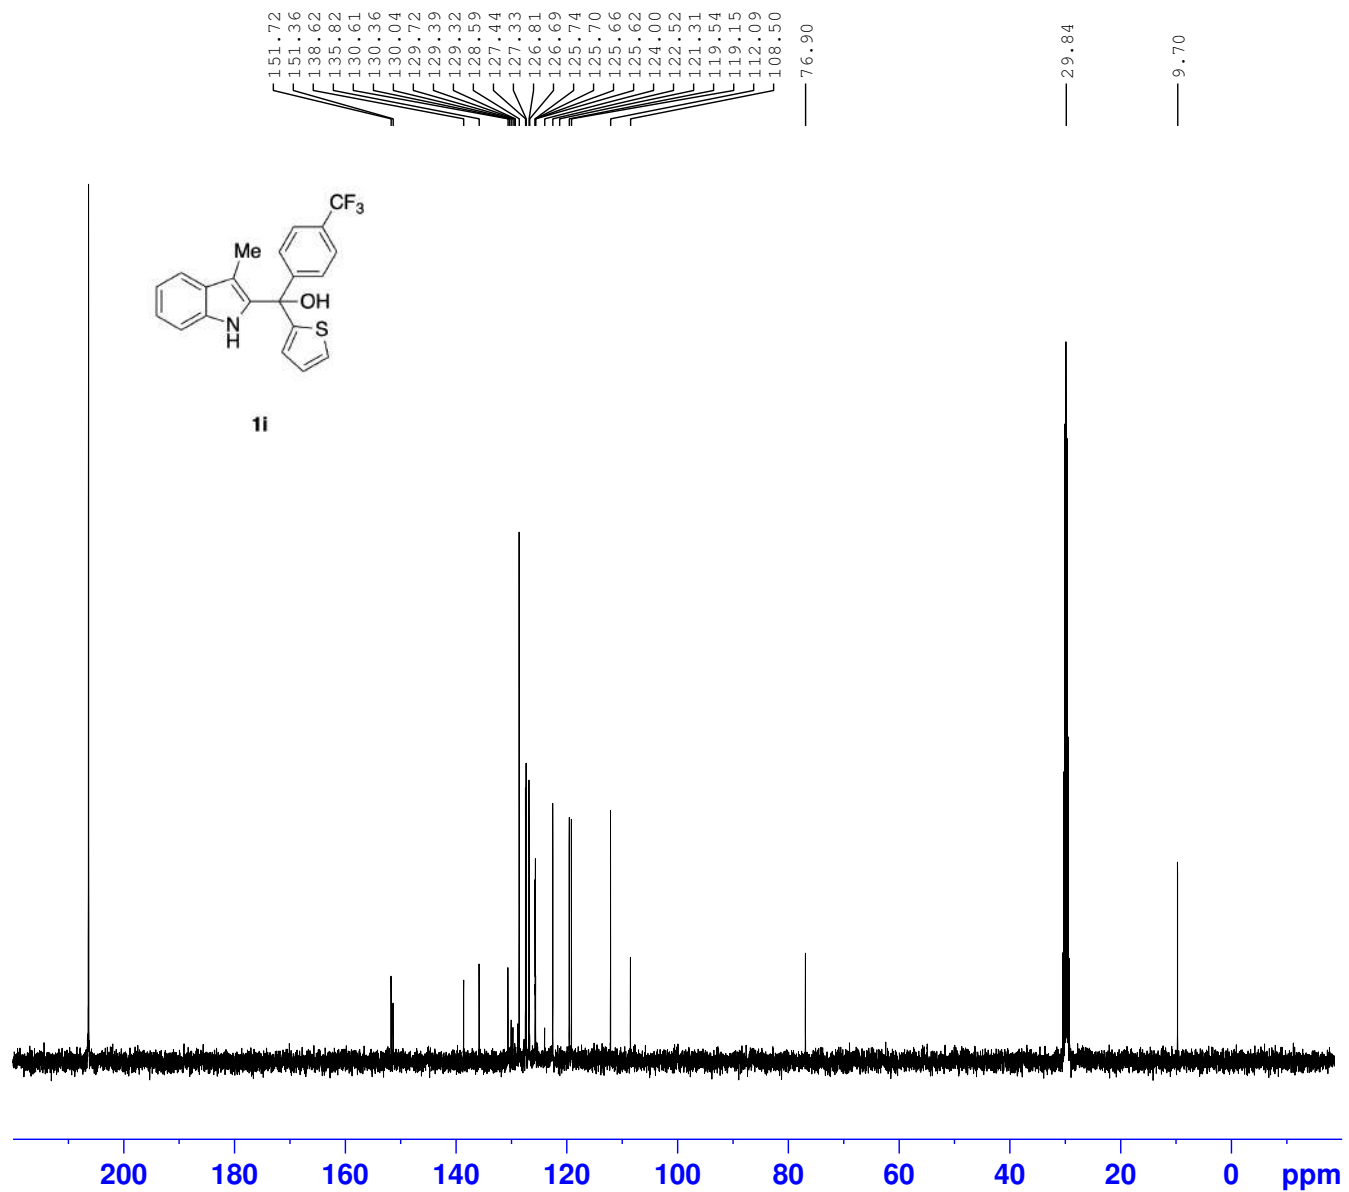

Current Data Parameters  
 NAME YQL-1-163-A-13C  
 EXPNO 3  
 PROCNO 1

F2 - Acquisition Parameters  
 Date\_ 20210710  
 Time 22.40  
 INSTRUM spect  
 PROBHD 5 mm DUL 13C-1  
 PULPROG zgpg30  
 TD 65536  
 SOLVENT Acetone  
 NS 80  
 DS 1  
 SWH 24038.461 Hz  
 FIDRES 0.366798 Hz  
 AQ 1.3631488 sec  
 RG 2050  
 DW 20.800 usec  
 DE 6.00 usec  
 TE 295.4 K  
 D1 2.00000000 sec  
 D11 0.03000000 sec  
 TD0 1

==== CHANNEL f1 =====  
 NUC1 13C  
 P1 40.00 usec  
 PL1 -3.00 dB  
 PL1W 60.64365387 W  
 SFO1 100.6228298 MHz

==== CHANNEL f2 =====  
 CPDPRG[2] waltz16  
 NUC2 1H  
 PCPD2 80.00 usec  
 PL2 -1.00 dB  
 PL12 14.39 dB  
 PL13 18.00 dB  
 PL2W 12.17476940 W  
 PL12W 0.35193357 W  
 PL13W 0.15327126 W  
 SFO2 400.1316005 MHz

F2 - Processing parameters  
 SI 32768  
 SF 100.6126858 MHz  
 WDW EM  
 SSB 0  
 LB 1.00 Hz  
 GB 0  
 PC 1.40

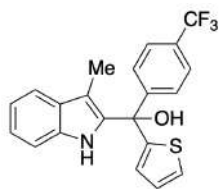

1i

-62.74

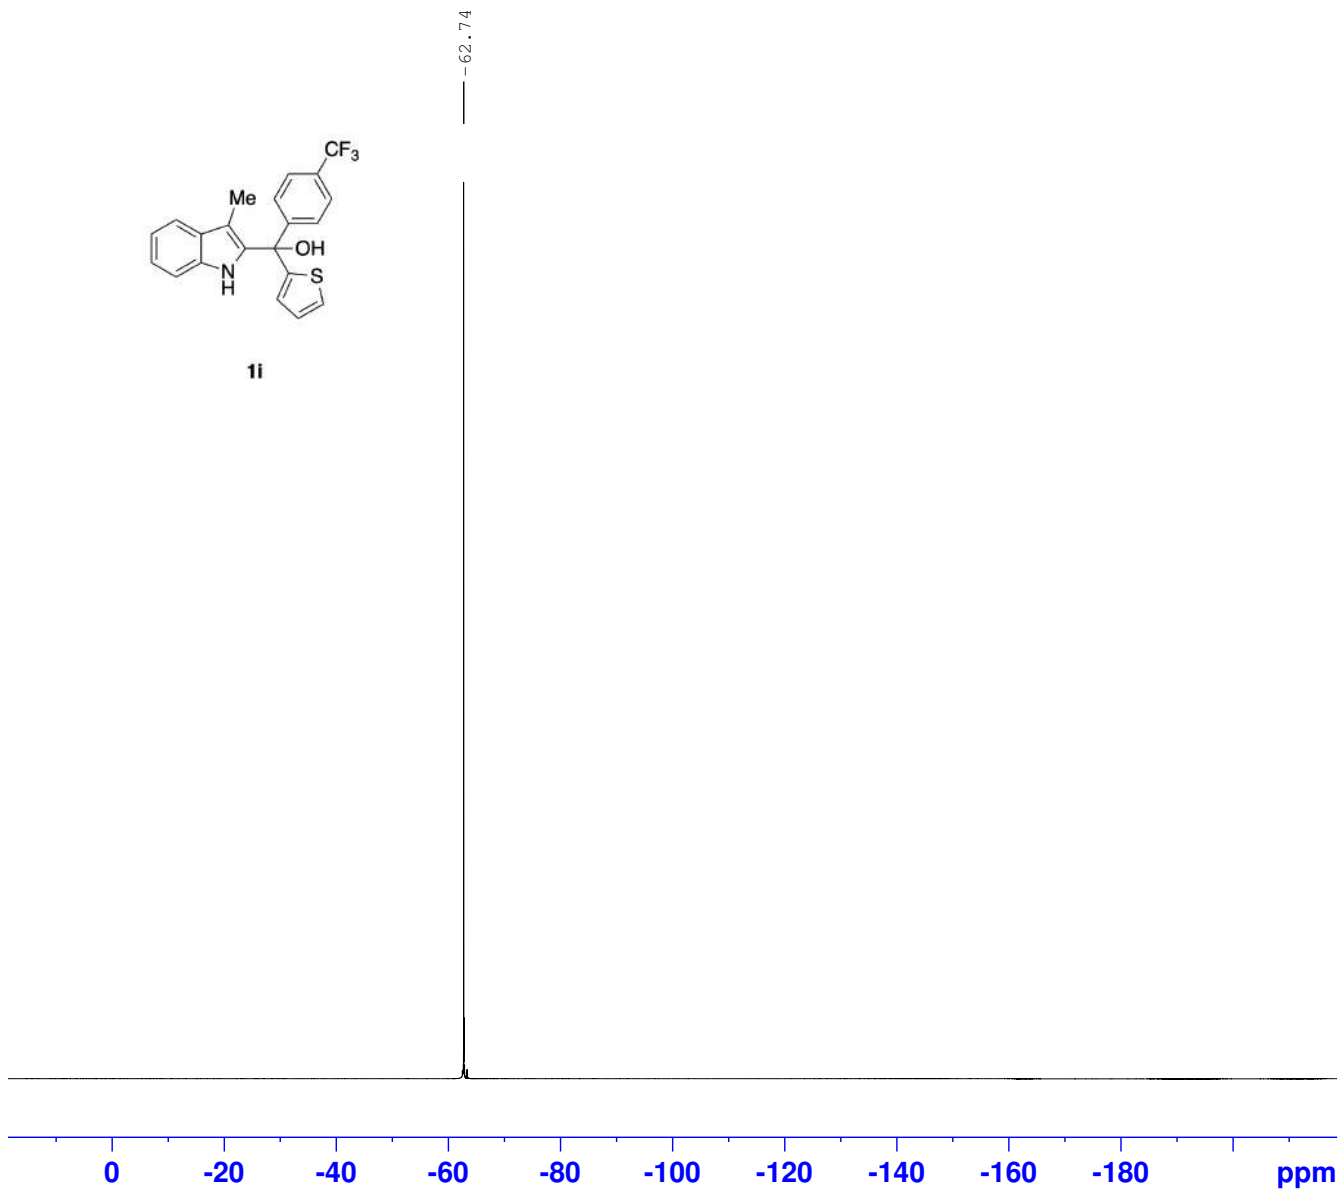

Current Data Parameters  
 NAME YQL-1-163-A  
 EXPNO 3  
 PROCNO 1

F2 - Acquisition Parameters  
 Date\_ 20210710  
 Time 22.19  
 INSTRUM spect  
 PROBHD 5 mm PABBO BB/  
 PULPROG zgflqn  
 TD 131072  
 SOLVENT Acetone  
 NS 16  
 DS 4  
 SWH 89285.711 Hz  
 FIDRES 0.681196 Hz  
 AQ 0.7340032 sec  
 RG 196.92  
 DW 5.600 usec  
 DE 6.50 usec  
 TE 296.6 K  
 D1 1.00000000 sec  
 TD0 1

===== CHANNEL f1 =====  
 SFO1 376.4607164 MHz  
 NUC1 19F  
 P1 14.70 usec  
 PLW1 15.99600029 W

F2 - Processing parameters  
 SI 65536  
 SF 376.4983660 MHz  
 WDW EM  
 SSB 0  
 LB 0.30 Hz  
 GB 0  
 PC 1.00

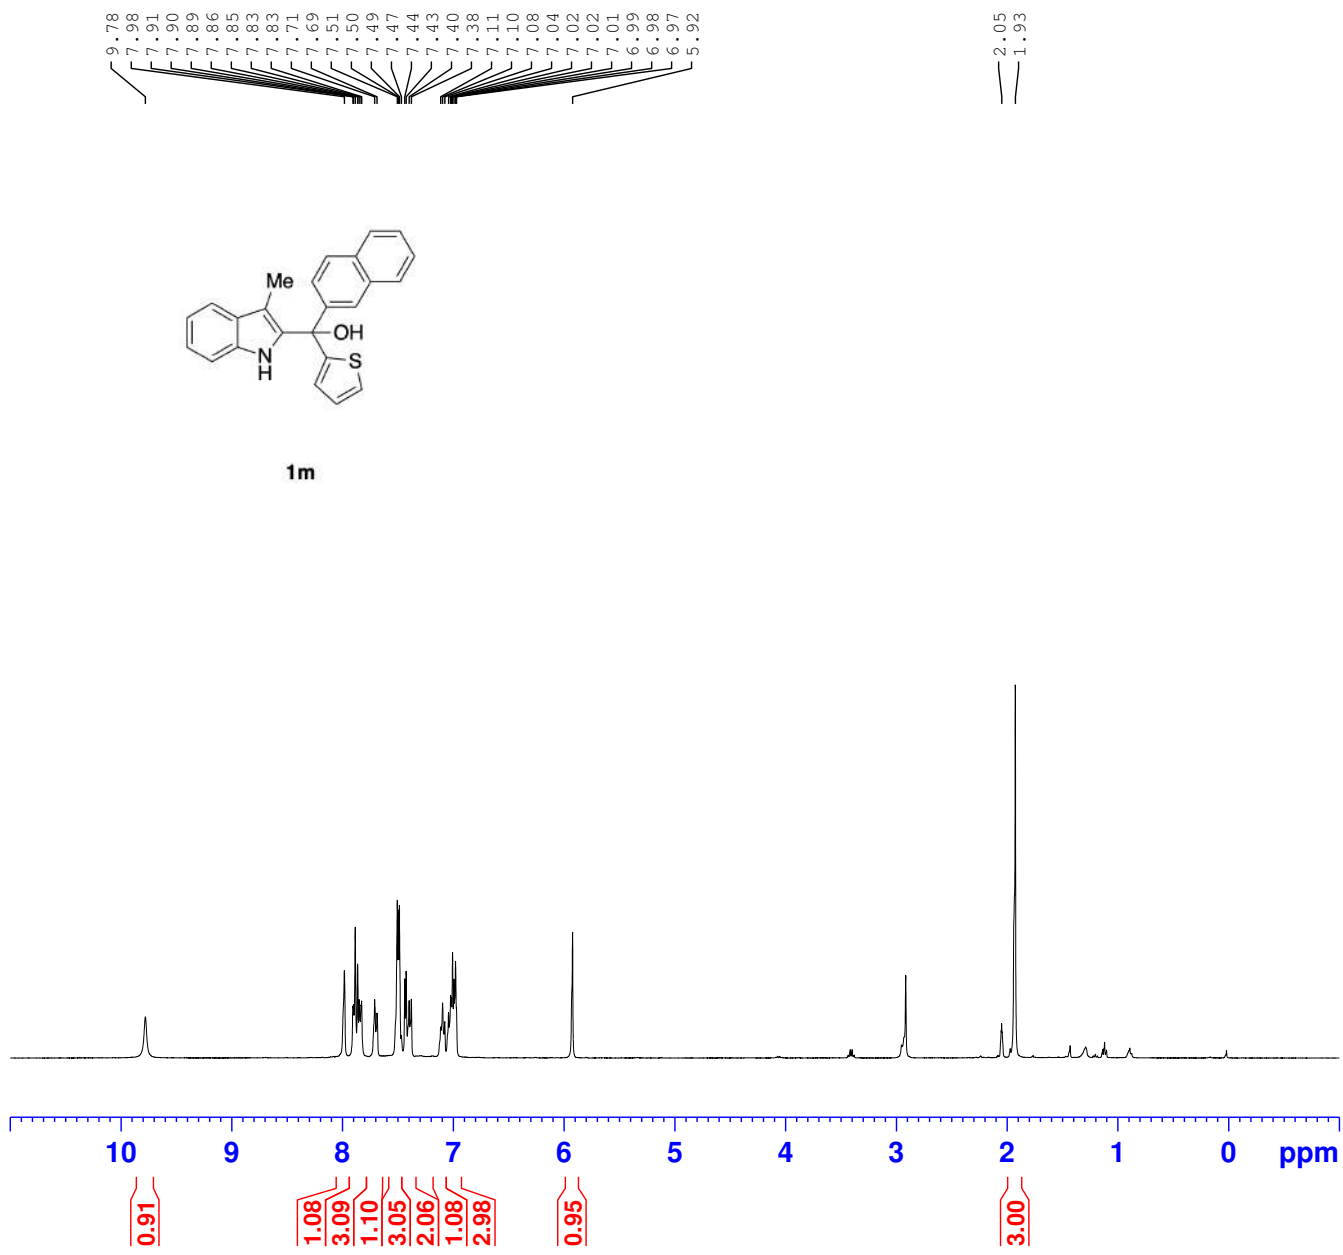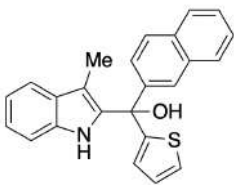

1m

Current Data Parameters  
 NAME YQL-1-151-Sm  
 EXPNO 1  
 PROCNO 1

F2 - Acquisition Parameters  
 Date\_ 20210710  
 Time 21.25  
 INSTRUM spect  
 PROBHD 5 mm DUL 13C-1  
 PULPROG zg30  
 TD 65536  
 SOLVENT Acetone  
 NS 8  
 DS 0  
 SWH 8223.685 Hz  
 FIDRES 0.125483 Hz  
 AQ 3.9845889 sec  
 RG 181  
 DW 60.800 usec  
 DE 6.00 usec  
 TE 295.0 K  
 D1 1.00000000 sec  
 TD0 1

==== CHANNEL f1 =====  
 NUC1 1H  
 P1 15.80 usec  
 PL1 -1.00 dB  
 PL1W 12.17476940 W  
 SFO1 400.1324710 MHz

F2 - Processing parameters  
 SI 32768  
 SF 400.1300074 MHz  
 WDW EM  
 SSB 0  
 LB 0.30 Hz  
 GB 0  
 PC 1.00

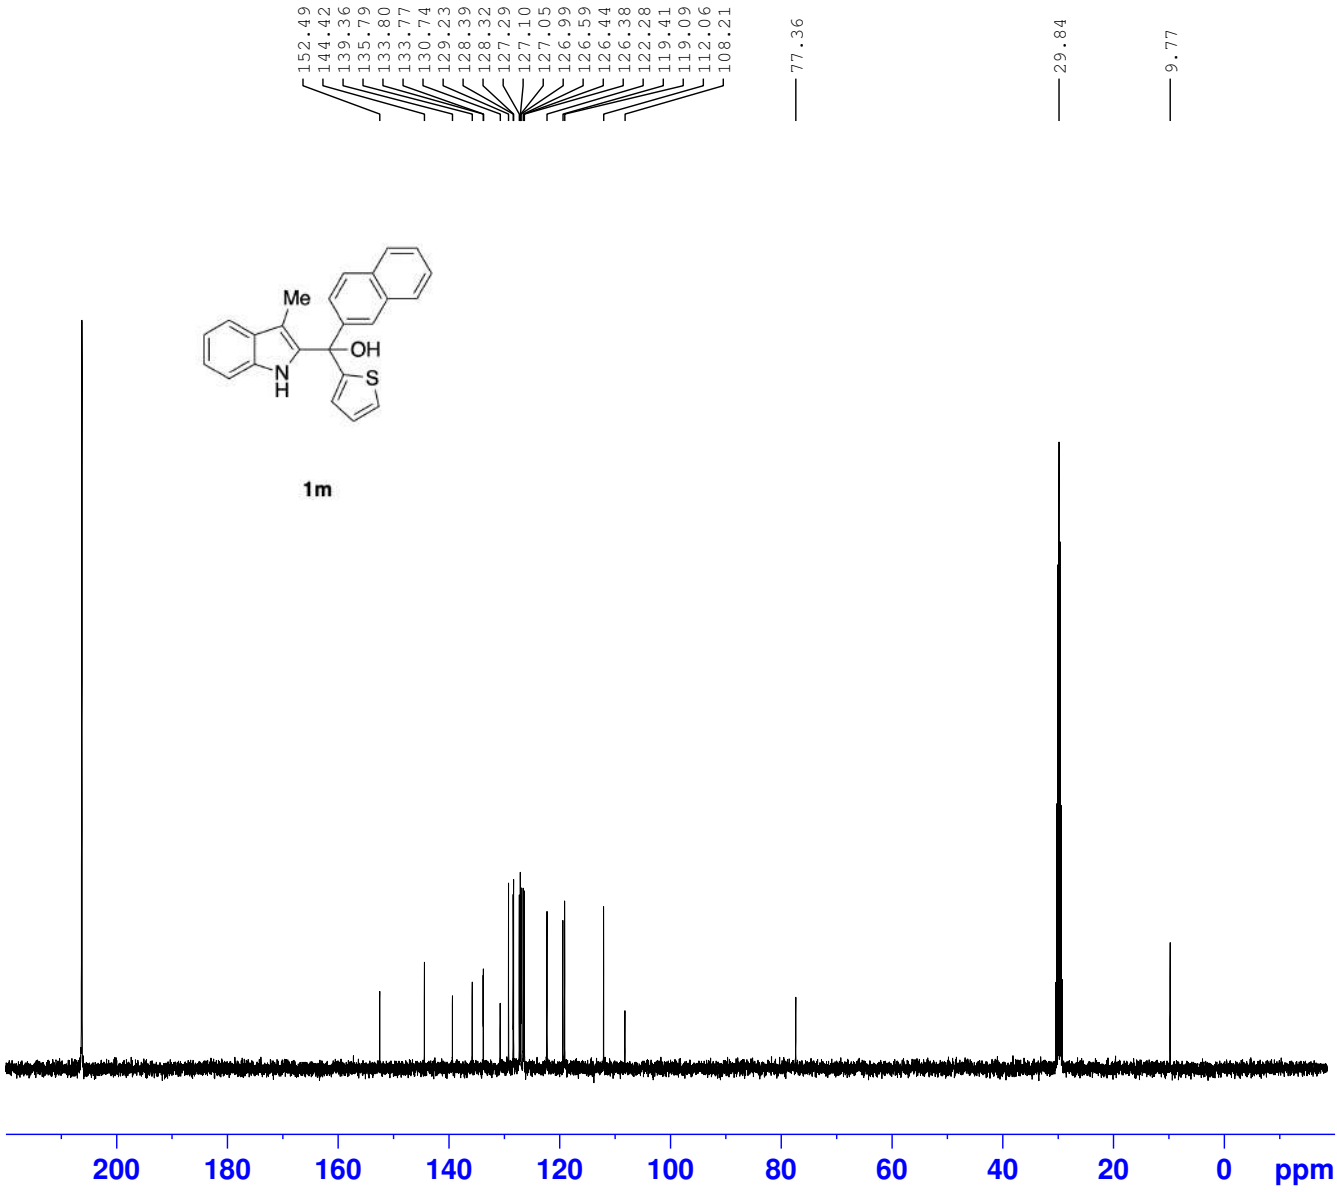

Current Data Parameters  
 NAME YQL-1-151-Sm  
 EXPNO 2  
 PROCNO 1

F2 - Acquisition Parameters  
 Date\_ 20210710  
 Time 21.29  
 INSTRUM spect  
 PROBHD 5 mm DUL 13C-1  
 PULPROG zgpg30  
 TD 65536  
 SOLVENT Acetone  
 NS 200  
 DS 1  
 SWH 24038.461 Hz  
 FIDRES 0.366798 Hz  
 AQ 1.3631488 sec  
 RG 2050  
 DW 20.800 usec  
 DE 6.00 usec  
 TE 295.0 K  
 D1 2.00000000 sec  
 D11 0.03000000 sec  
 TD0 1

==== CHANNEL f1 =====  
 NUC1 13C  
 P1 40.00 usec  
 PL1 -3.00 dB  
 PL1W 60.64365387 W  
 SFO1 100.6228298 MHz

==== CHANNEL f2 =====  
 CPDPRG[2] waltz16  
 NUC2 1H  
 PCPD2 80.00 usec  
 PL2 -1.00 dB  
 PL12 14.39 dB  
 PL13 18.00 dB  
 PL2W 12.17476940 W  
 PL12W 0.35193357 W  
 PL13W 0.15327126 W  
 SFO2 400.1316005 MHz

F2 - Processing parameters  
 SI 32768  
 SF 100.6126851 MHz  
 WDW EM  
 SSB 0  
 LB 1.00 Hz  
 GB 0  
 PC 1.40

9.67  
7.51  
7.51  
7.50  
7.49  
7.49  
7.47  
7.45  
7.39  
7.37  
7.36  
7.35  
7.35  
7.34  
7.32  
7.31  
7.31  
7.30  
7.30  
7.29  
7.29  
7.28  
7.28  
7.27  
7.27  
7.09  
7.09  
7.07  
7.06  
7.05  
7.05  
7.02  
7.02  
7.00  
6.98  
6.98  
6.63  
5.60

2.42  
2.05  
1.89

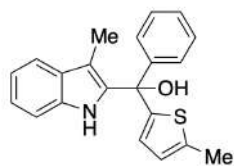

1n

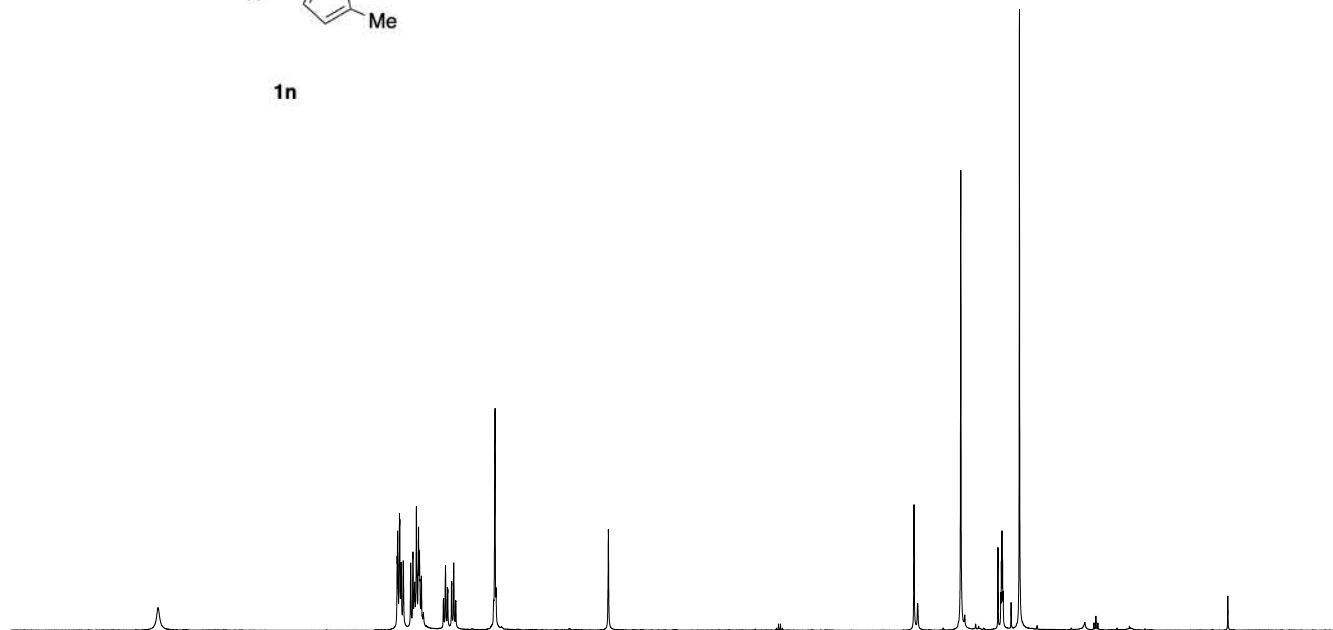

0.96

3.02

4.08

1.00

1.03

1.97

0.76

2.97

3.00

Current Data Parameters  
NAME CTAM-1013-re-2  
EXPNO 1  
PROCNO 1

F2 - Acquisition Parameters  
Date\_ 20210628  
Time 21.41  
INSTRUM spect  
PROBHD 5 mm PABBO BB/  
PULPROG zg30  
TD 32050  
SOLVENT Acetone  
NS 4  
DS 0  
SWH 8012.820 Hz  
FIDRES 0.250010 Hz  
AQ 1.9999200 sec  
RG 62.3  
DW 62.400 usec  
DE 6.50 usec  
TE 300.3 K  
D1 1.00000000 sec  
TD0 1

==== CHANNEL f1 =====  
SFO1 400.1324710 MHz  
NUC1 1H  
P1 9.15 usec  
PLW1 16.00000000 W

F2 - Processing parameters  
SI 65536  
SF 400.1300068 MHz  
WDW EM  
SSB 0  
LB 0.30 Hz  
GB 0  
PC 1.00



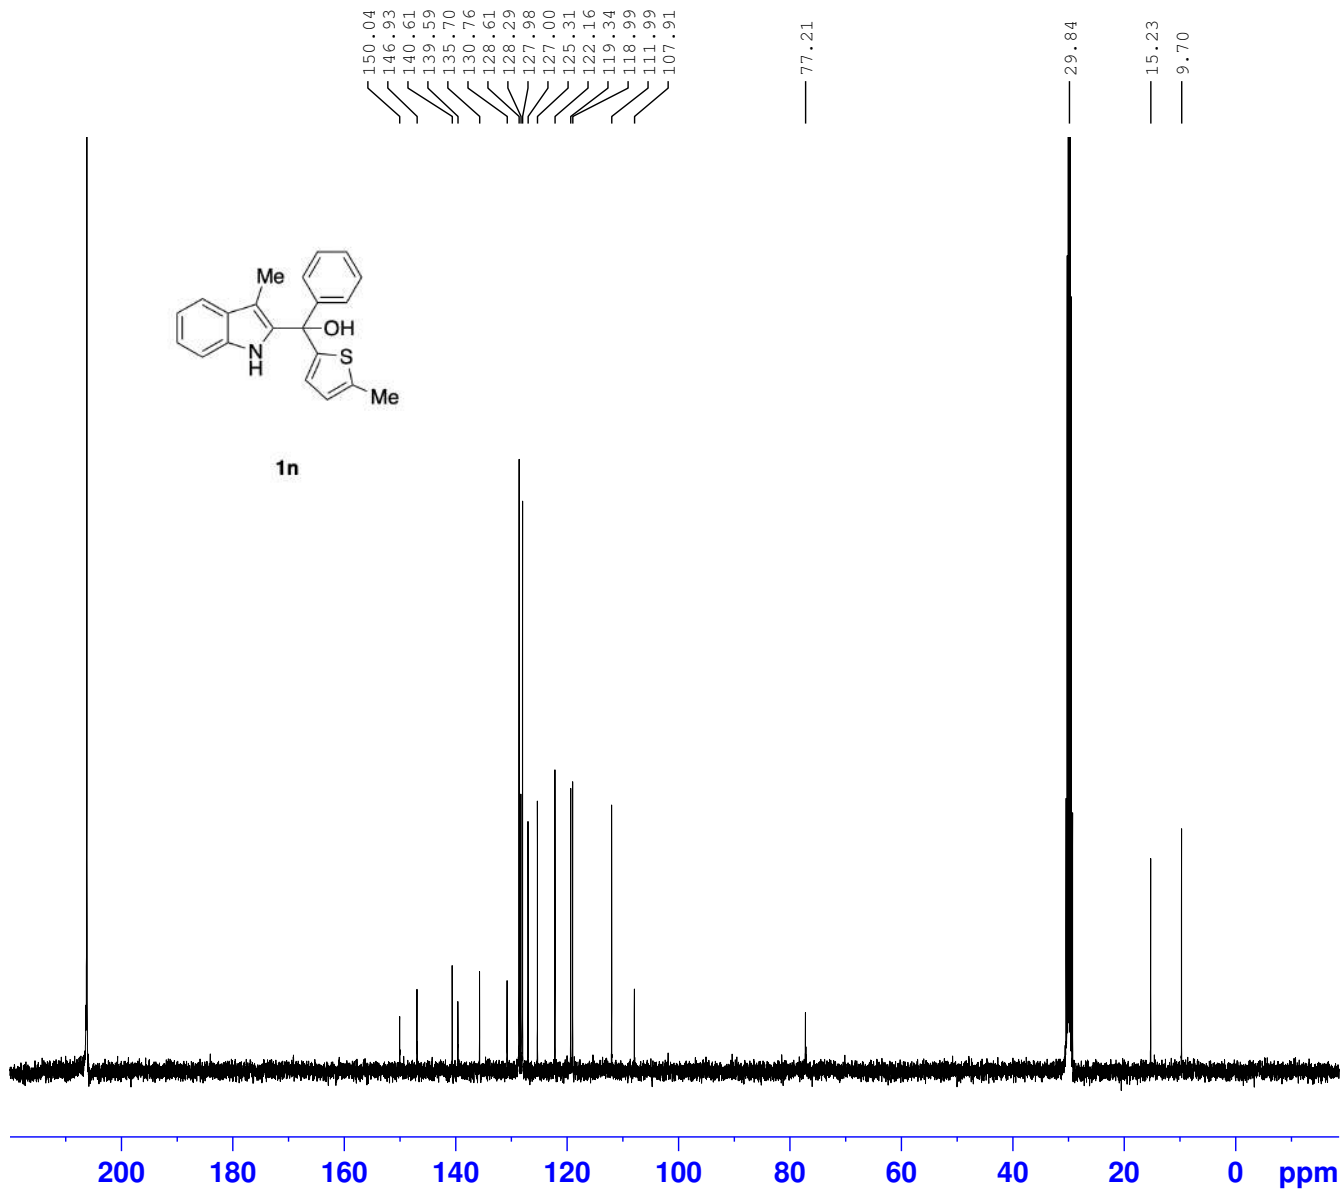

Current Data Parameters  
 NAME CTAM-1013-re-2  
 EXPNO 2  
 PROCNO 1

F2 - Acquisition Parameters  
 Date\_ 20210628  
 Time 21.34  
 INSTRUM spect  
 PROBHD 5 mm PABBO BB/  
 PULPROG zgpg30  
 TD 65536  
 SOLVENT Acetone  
 NS 100  
 DS 4  
 SWH 24038.461 Hz  
 FIDRES 0.366798 Hz  
 AQ 1.3631488 sec  
 RG 196.42  
 DW 20.800 usec  
 DE 6.50 usec  
 TE 300.2 K  
 D1 2.00000000 sec  
 D11 0.03000000 sec  
 TD0 1

==== CHANNEL f1 =====  
 SFO1 100.6228298 MHz  
 NUC1 13C  
 P1 10.22 usec  
 PLW1 74.00000000 W

==== CHANNEL f2 =====  
 SFO2 400.1316005 MHz  
 NUC2 1H  
 CPDPRG[2] waltz16  
 PCPD2 90.00 usec  
 PLW2 16.00000000 W  
 PLW12 0.16538000 W  
 PLW13 0.13395999 W

F2 - Processing parameters  
 SI 32768  
 SF 100.6126803 MHz  
 WDW EM  
 SSB 0  
 LB 1.00 Hz  
 GB 0  
 PC 1.40

9.84  
7.87  
7.86  
7.86  
7.85  
7.77  
7.76  
7.75  
7.74  
7.59  
7.57  
7.51  
7.49  
7.40  
7.38  
7.36  
7.36  
7.35  
7.34  
7.33  
7.33  
7.32  
7.32  
7.31  
7.30  
7.29  
7.16  
7.12  
7.10  
7.08  
7.08  
7.05  
7.03  
7.01  
5.97

2.05  
1.95

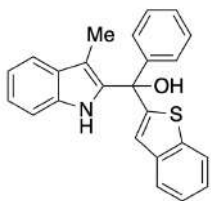

10

Current Data Parameters  
NAME YQL-2-11  
EXPNO 1  
PROCNO 1

F2 - Acquisition Parameters  
Date\_ 20210731  
Time 18.29  
INSTRUM spect  
PROBHD 5 mm PABBO BB/  
PULPROG zg30  
TD 65536  
SOLVENT Acetone  
NS 8  
DS 0  
SWH 8012.820 Hz  
FIDRES 0.122266 Hz  
AQ 4.0894465 sec  
RG 34.77  
DW 62.400 usec  
DE 6.50 usec  
TE 296.7 K  
D1 1.00000000 sec  
TD0 1

==== CHANNEL f1 =====  
SFO1 400.1324710 MHz  
NUC1 1H  
P1 14.50 usec  
PLW1 11.99499989 W

F2 - Processing parameters  
SI 65536  
SF 400.1300075 MHz  
WDW EM  
SSB 0  
LB 0.30 Hz  
GB 0  
PC 1.00

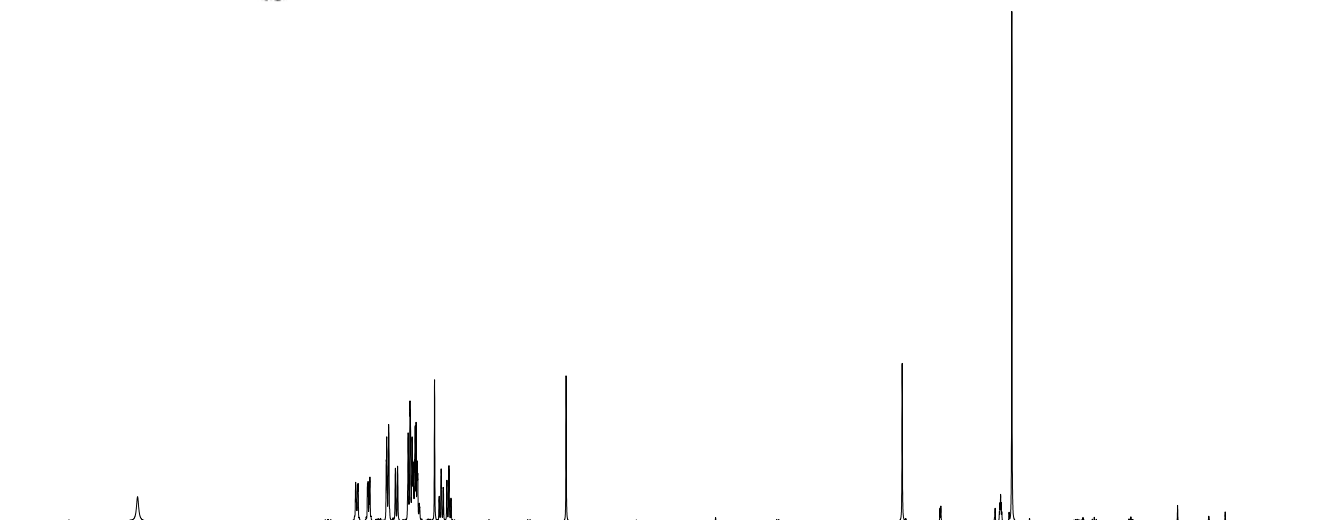

0.95

1.00

1.03

1.97

1.02

6.06

1.00

1.00

1.00

0.94

3.00

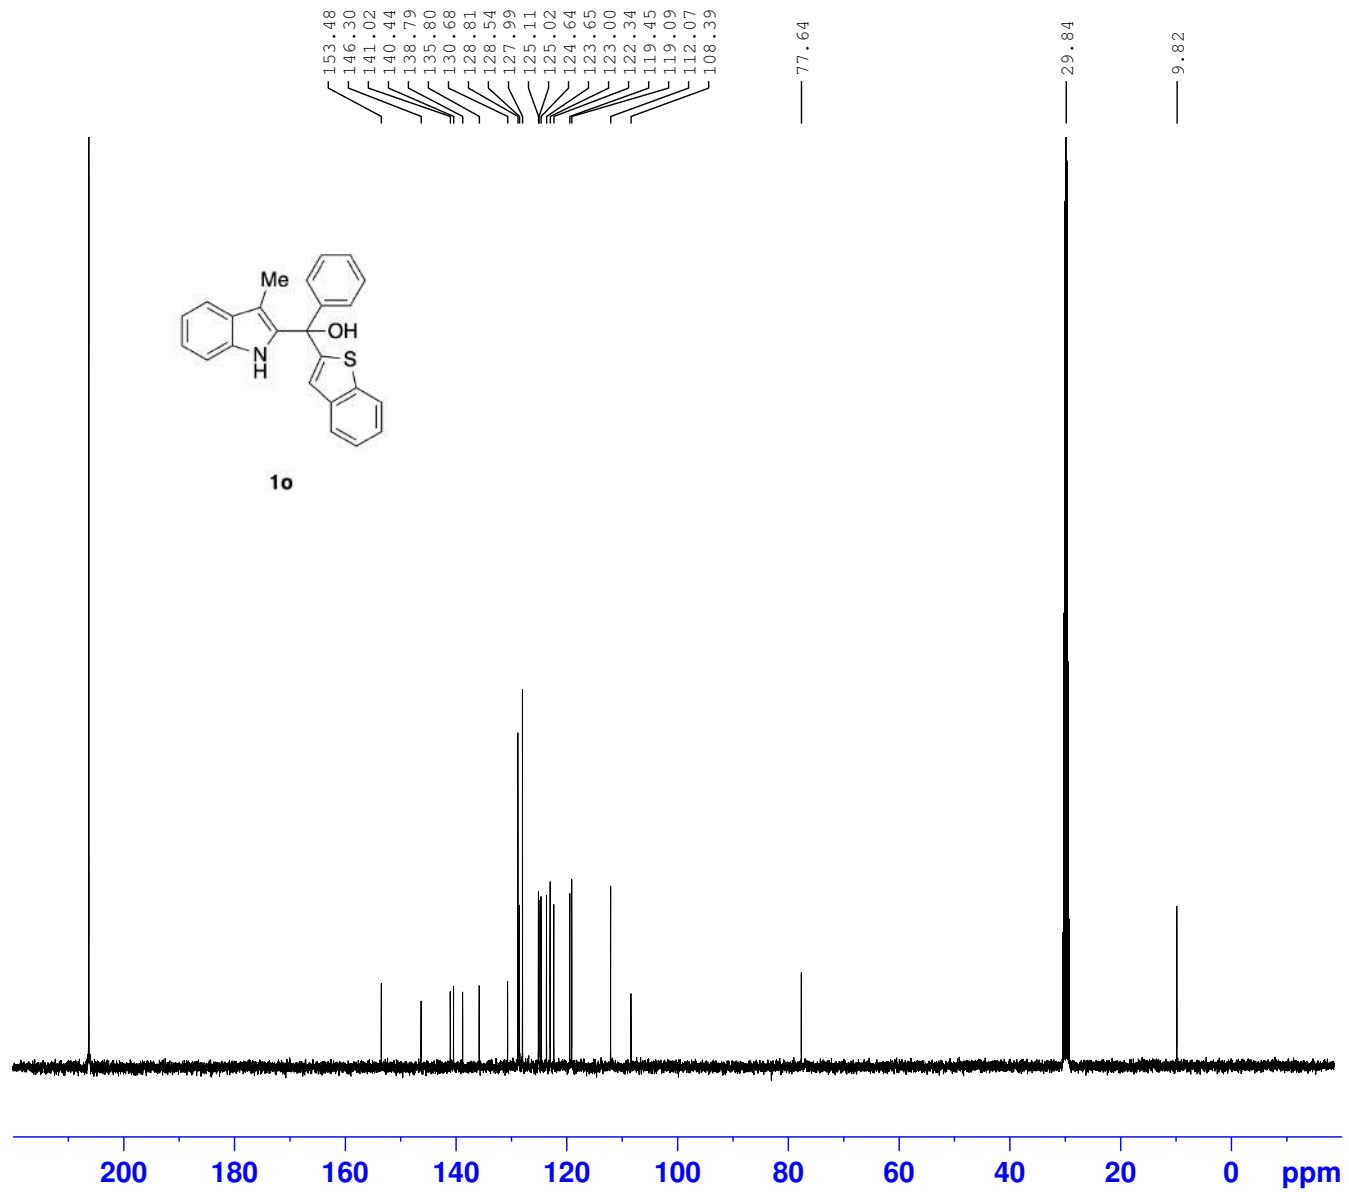

Current Data Parameters  
 NAME YQL-2-11  
 EXPNO 2  
 PROCNO 1

F2 - Acquisition Parameters  
 Date\_ 20210731  
 Time 18.32  
 INSTRUM spect  
 PROBHD 5 mm PABBO BB/  
 PULPROG zgpg30  
 TD 65536  
 SOLVENT Acetone  
 NS 54  
 DS 2  
 SWH 24038.461 Hz  
 FIDRES 0.366798 Hz  
 AQ 1.3631488 sec  
 RG 196.92  
 DW 20.800 usec  
 DE 6.50 usec  
 TE 297.3 K  
 D1 2.0000000 sec  
 D11 0.03000000 sec  
 TD0 1

==== CHANNEL f1 =====  
 SFO1 100.6228298 MHz  
 NUC1 13C  
 P1 9.70 usec  
 PLW1 46.98899841 W

==== CHANNEL f2 =====  
 SFO2 400.1316005 MHz  
 NUC2 1H  
 CPDPRG[2] waltz16  
 PCPD2 90.00 usec  
 PLW2 11.99499989 W  
 PLW12 0.34213999 W  
 PLW13 0.27713001 W

F2 - Processing parameters  
 SI 32768  
 SF 100.6126859 MHz  
 WDW EM  
 SSB 0  
 LB 1.00 Hz  
 GB 0  
 PC 1.40

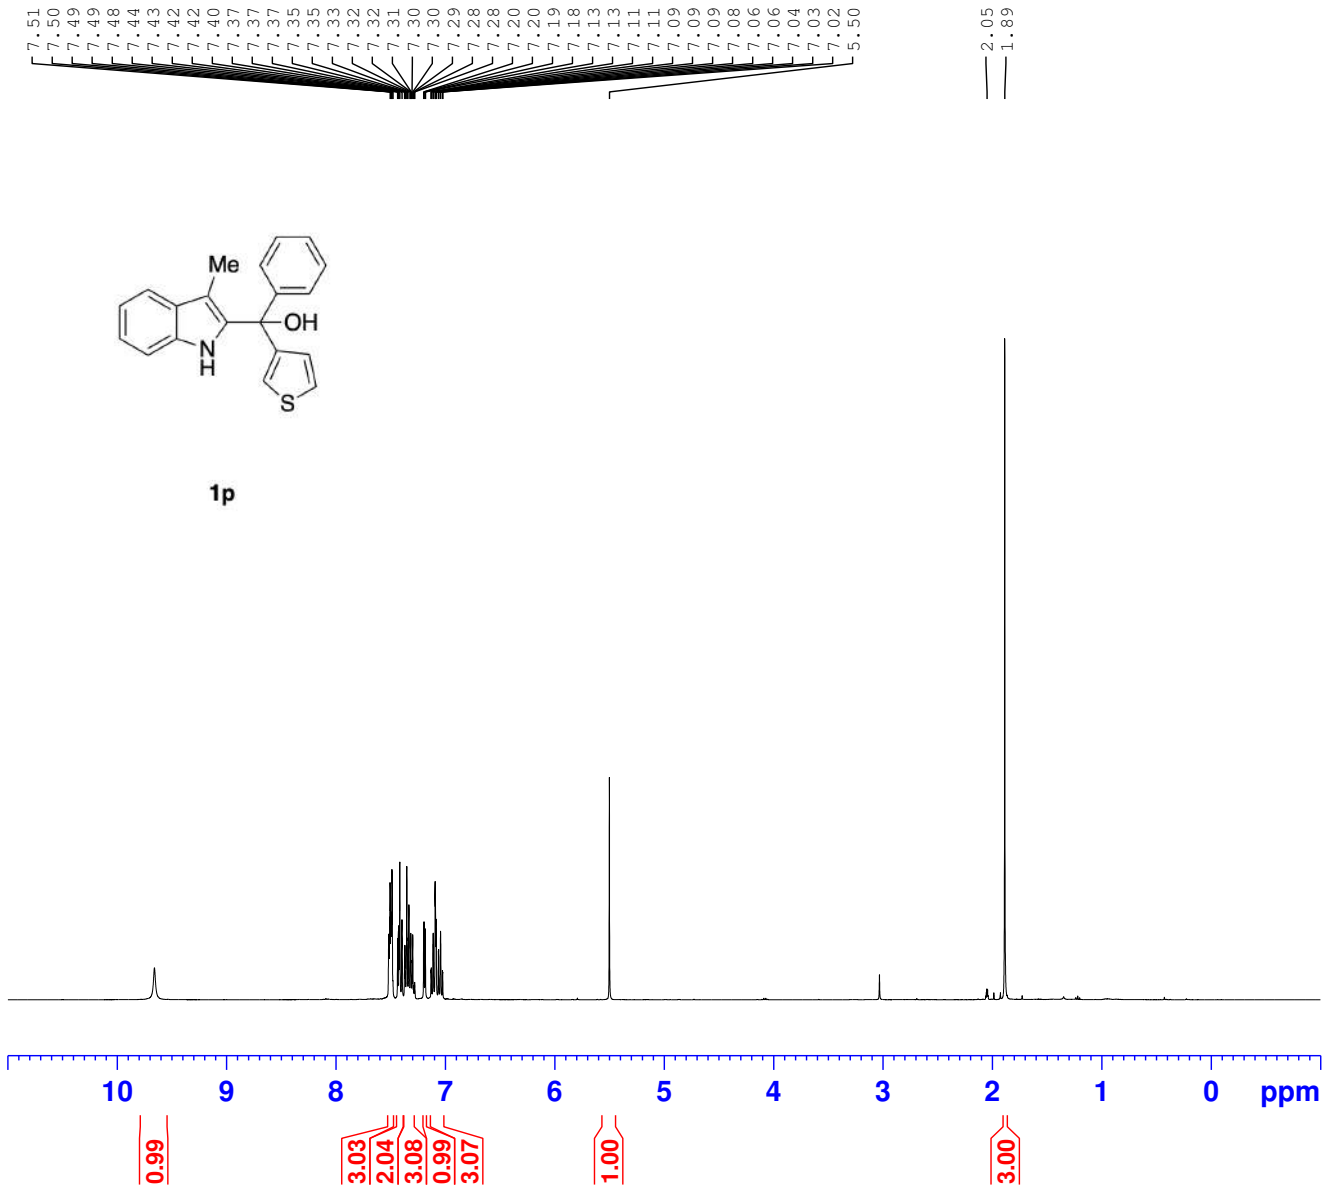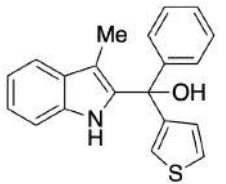

1p

Current Data Parameters  
 NAME YQL-2-64  
 EXPNO 1  
 PROCNO 1

F2 - Acquisition Parameters  
 Date\_ 20210918  
 Time 10.54  
 INSTRUM spect  
 PROBHD 5 mm PABBO BB/  
 PULPROG zg30  
 TD 65536  
 SOLVENT Acetone  
 NS 8  
 DS 0  
 SWH 8012.820 Hz  
 FIDRES 0.122266 Hz  
 AQ 4.0894465 sec  
 RG 22.47  
 DW 62.400 usec  
 DE 6.50 usec  
 TE 297.7 K  
 D1 1.00000000 sec  
 TD0 1

==== CHANNEL f1 =====  
 SFO1 400.1324710 MHz  
 NUC1 1H  
 P1 14.50 usec  
 PLW1 11.99499989 W

F2 - Processing parameters  
 SI 65536  
 SF 400.1300072 MHz  
 WDW EM  
 SSB 0  
 LB 0.30 Hz  
 GB 0  
 PC 1.00

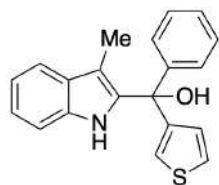

1p

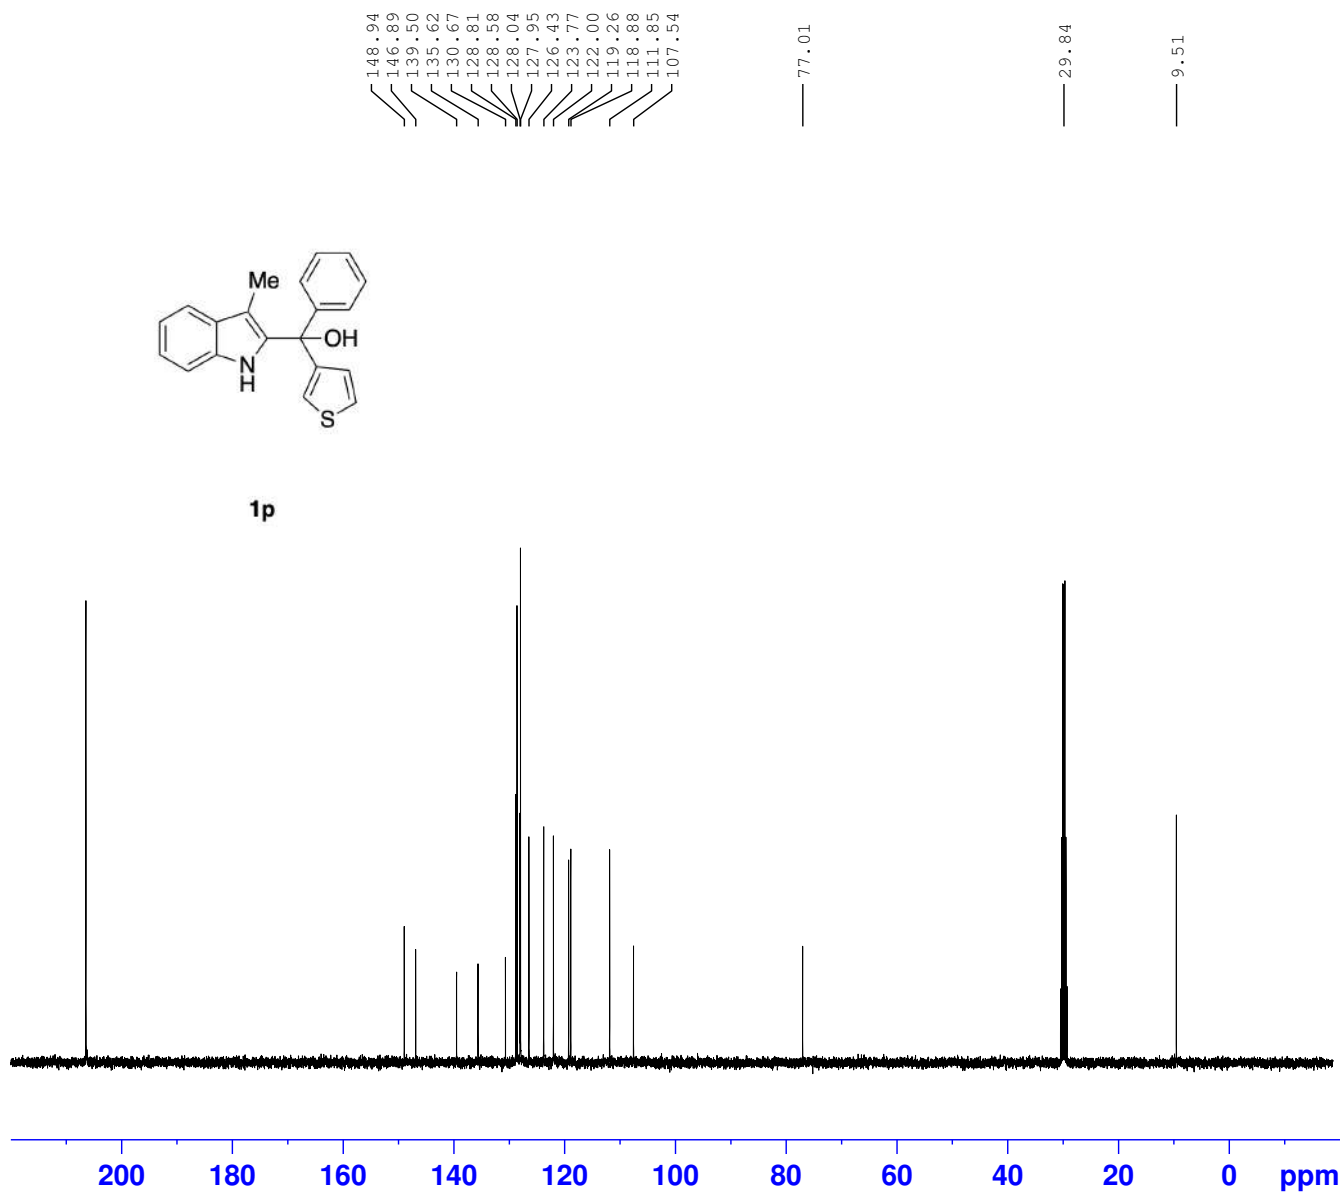

Current Data Parameters  
NAME YQL-2-64  
EXPNO 4  
PROCNO 1

F2 - Acquisition Parameters  
Date\_ 20210918  
Time 11.01  
INSTRUM spect  
PROBHD 5 mm PABBO BB/  
PULPROG zgpg30  
TD 65536  
SOLVENT Acetone  
NS 22  
DS 2  
SWH 24038.461 Hz  
FIDRES 0.366798 Hz  
AQ 1.3631488 sec  
RG 196.92  
DW 20.800 usec  
DE 6.50 usec  
TE 297.9 K  
D1 2.00000000 sec  
D11 0.03000000 sec  
TD0 1

==== CHANNEL f1 =====  
SFO1 100.6228298 MHz  
NUC1 13C  
P1 9.70 usec  
PLW1 46.98899841 W

==== CHANNEL f2 =====  
SFO2 400.1316005 MHz  
NUC2 1H  
CPDPRG[2] waltz16  
PCPD2 90.00 usec  
PLW2 11.99499989 W  
PLW12 0.34213999 W  
PLW13 0.27713001 W

F2 - Processing parameters  
SI 32768  
SF 100.6126986 MHz  
WDW EM  
SSB 0  
LB 1.00 Hz  
GB 0  
PC 1.40

9.70  
7.57  
7.57  
7.57  
7.54  
7.53  
7.53  
7.51  
7.51  
7.50  
7.48  
7.41  
7.39  
7.36  
7.36  
7.34  
7.32  
7.31  
7.30  
7.30  
7.29  
7.29  
7.27  
7.19  
7.19  
7.12  
7.11  
7.10  
7.08  
7.08  
7.05  
7.04  
7.03  
7.01  
7.01  
6.56  
6.56  
5.39

2.05  
1.96

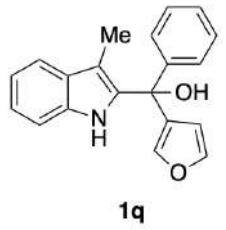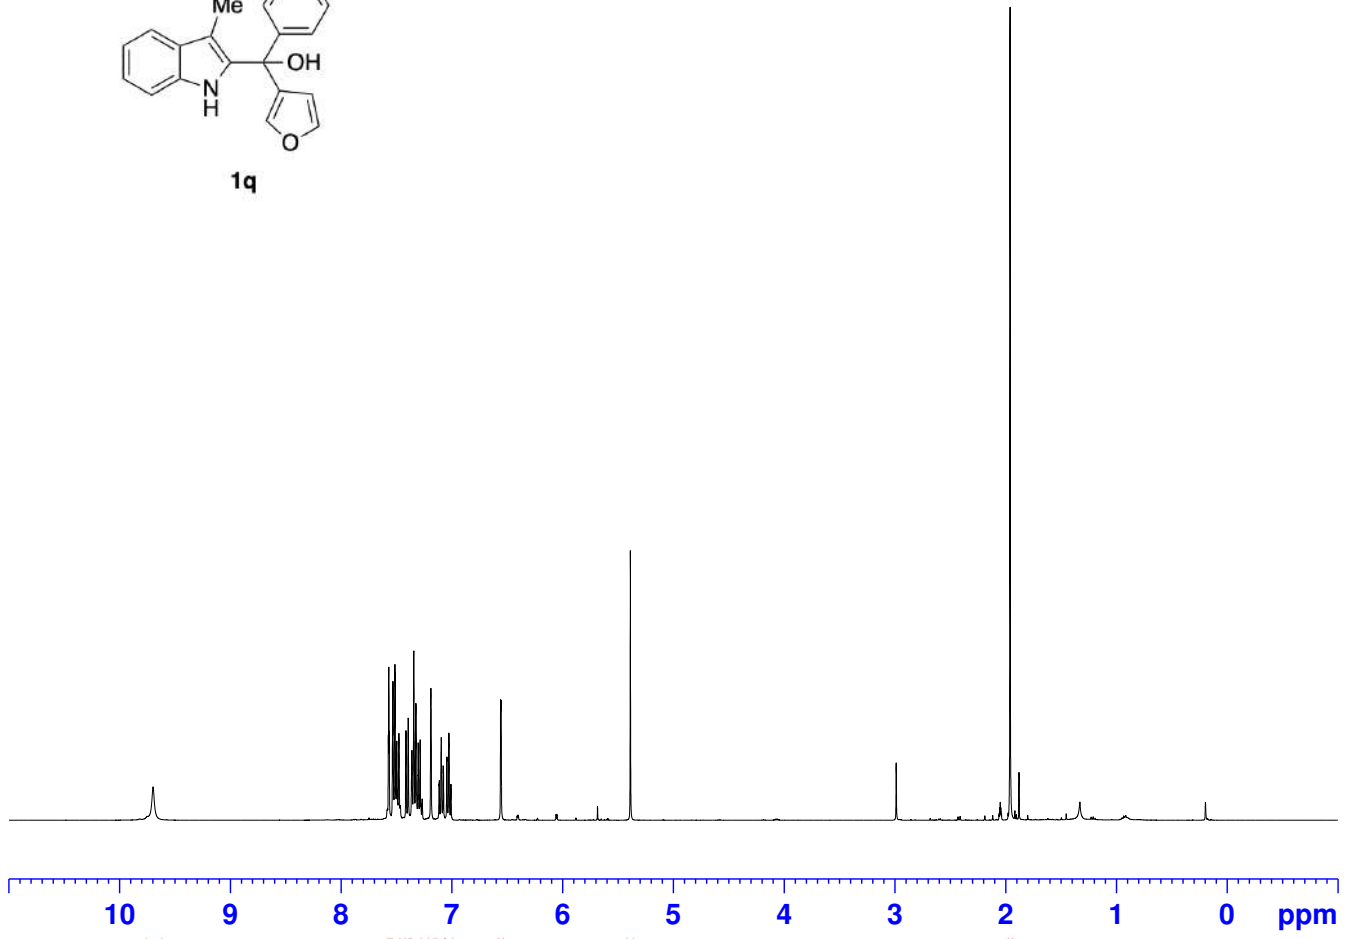

0.96

0.94  
3.19  
1.09  
3.17  
0.99  
1.13  
1.09  
0.99

0.97

3.00

Current Data Parameters  
NAME YQL-2-77  
EXPNO 1  
PROCNO 1

F2 - Acquisition Parameters  
Date\_ 20211007  
Time 9.14  
INSTRUM spect  
PROBHD 5 mm PABBO BB/  
PULPROG zg30  
TD 65536  
SOLVENT Acetone  
NS 8  
DS 0  
SWH 8012.820 Hz  
FIDRES 0.122266 Hz  
AQ 4.0894465 sec  
RG 25.32  
DW 62.400 usec  
DE 6.50 usec  
TE 297.3 K  
D1 1.00000000 sec  
TD0 1

==== CHANNEL f1 =====  
SF01 400.1324710 MHz  
NUC1 1H  
P1 14.50 usec  
PLW1 11.99499989 W

F2 - Processing parameters  
SI 65536  
SF 400.1300075 MHz  
WDW EM  
SSB 0  
LB 0.30 Hz  
GB 0  
PC 1.00

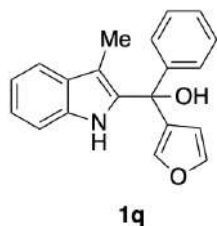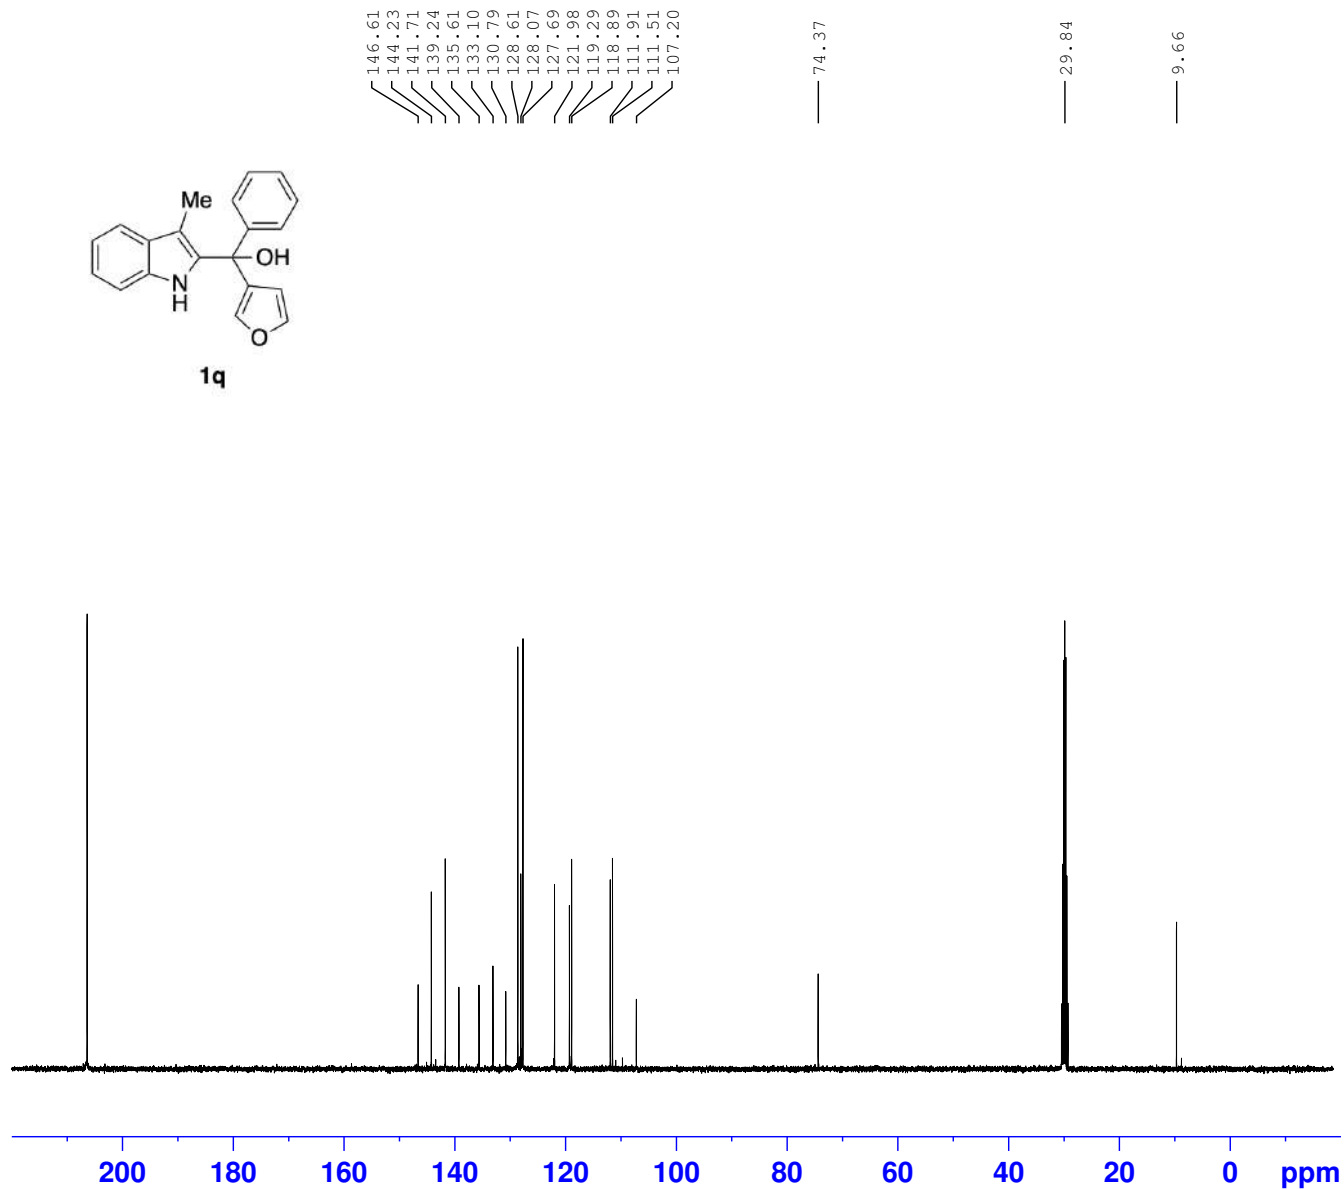

Current Data Parameters  
 NAME YQL-2-77  
 EXPNO 2  
 PROCNO 1

F2 - Acquisition Parameters  
 Date\_ 20211007  
 Time 9.17  
 INSTRUM spect  
 PROBHD 5 mm PABBO BB/  
 PULPROG zgpg30  
 TD 65536  
 SOLVENT Acetone  
 NS 56  
 DS 2  
 SWH 24038.461 Hz  
 FIDRES 0.366798 Hz  
 AQ 1.3631488 sec  
 RG 196.92  
 DW 20.800 usec  
 DE 6.50 usec  
 TE 298.0 K  
 D1 2.00000000 sec  
 D11 0.03000000 sec  
 TD0 1

===== CHANNEL f1 =====  
 SFO1 100.6228298 MHz  
 NUC1 13C  
 P1 9.70 usec  
 PLW1 46.98899841 W

===== CHANNEL f2 =====  
 SFO2 400.1316005 MHz  
 NUC2 1H  
 CPDPRG[2] waltz16  
 PCPD2 90.00 usec  
 PLW2 11.99499989 W  
 PLW12 0.34213999 W  
 PLW13 0.27713001 W

F2 - Processing parameters  
 SI 32768  
 SF 100.6126902 MHz  
 WDW EM  
 SSB 0  
 LB 1.00 Hz  
 GB 0  
 PC 1.40

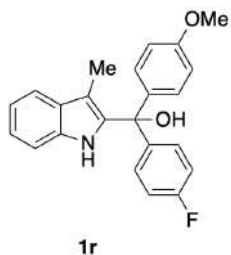

9.62  
7.48  
7.45  
7.43  
7.43  
7.42  
7.37  
7.35  
7.30  
7.29  
7.12  
7.11  
7.11  
7.09  
7.07  
7.07  
7.06  
7.05  
7.03  
7.01  
6.99  
6.91  
6.90  
6.90  
6.89  
6.88  
6.87  
5.50

3.78

2.05  
1.83

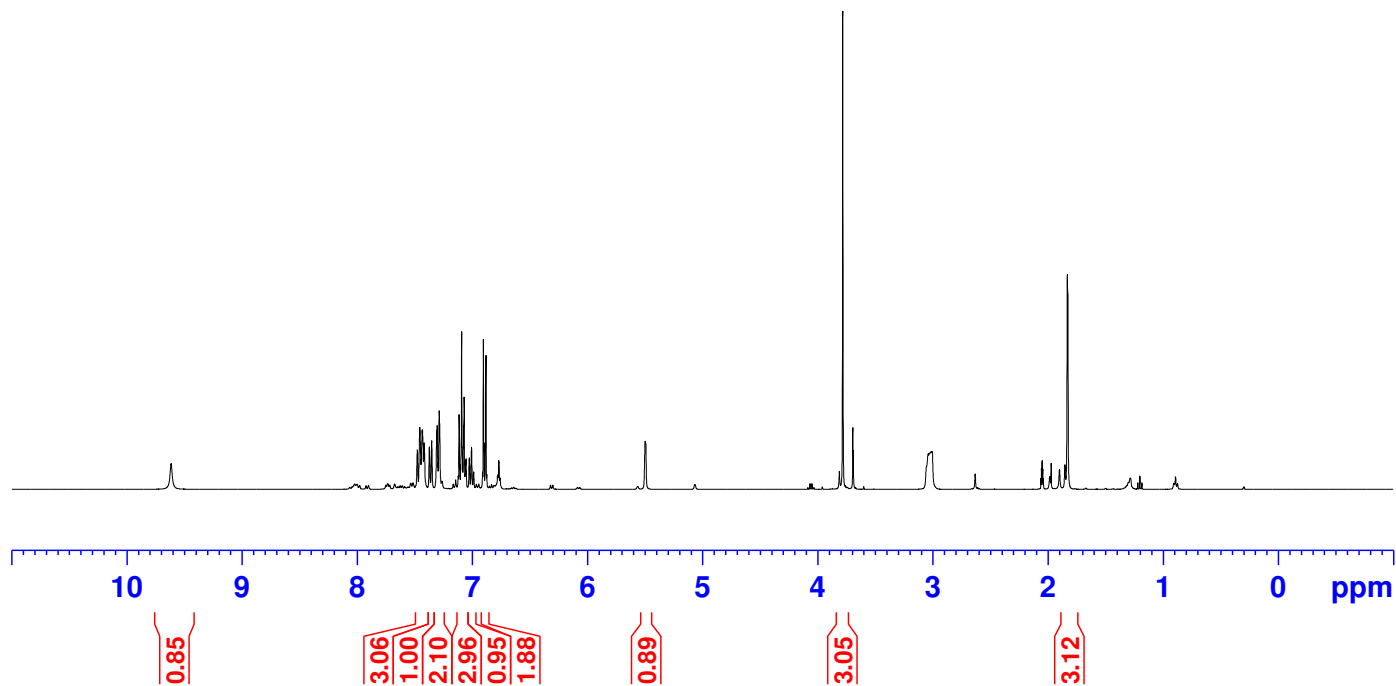

Current Data Parameters  
NAME YQL-2-183  
EXPNO 1  
PROCNO 1

F2 - Acquisition Parameters

Date\_ 20220302  
Time 17.00  
INSTRUM spect  
PROBHD 5 mm DUL 13C-1  
PULPROG zg30  
TD 65536  
SOLVENT Acetone  
NS 8  
DS 0  
SWH 8223.685 Hz  
FIDRES 0.125483 Hz  
AQ 3.9845889 sec  
RG 101  
DW 60.800 usec  
DE 6.00 usec  
TE 293.5 K  
D1 1.00000000 sec  
TD0 1

==== CHANNEL f1 =====

NUC1 1H  
P1 15.80 usec  
PL1 -1.00 dB  
PL1W 12.17476940 W  
SFO1 400.1324710 MHz

F2 - Processing parameters

SI 32768  
SF 400.1300069 MHz  
WDW EM  
SSB 0  
LB 0.30 Hz  
GB 0  
PC 1.00



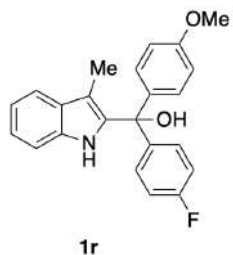

163.47  
161.04  
159.40  
143.16  
143.13  
139.39  
138.55  
135.29  
130.24  
130.09  
130.01  
129.30  
121.62  
118.88  
118.45  
114.80  
114.59  
113.52  
111.46  
107.51

78.23

55.04

29.40

9.39

Current Data Parameters  
NAME YQL-2-183  
EXPNO 2  
PROCNO 1

F2 - Acquisition Parameters  
Date\_ 20220302  
Time 17.08  
INSTRUM spect  
PROBHD 5 mm DUL 13C-1  
PULPROG zgpg30  
TD 65536  
SOLVENT Acetone  
NS 99  
DS 1  
SWH 24038.461 Hz  
FIDRES 0.366798 Hz  
AQ 1.3631488 sec  
RG 2050  
DW 20.800 usec  
DE 6.00 usec  
TE 293.6 K  
D1 2.00000000 sec  
D11 0.03000000 sec  
TD0 1

===== CHANNEL f1 =====  
NUC1 13C  
P1 40.00 usec  
PL1 -3.00 dB  
PL1W 60.64365387 W  
SFO1 100.6228298 MHz

===== CHANNEL f2 =====  
CPDPRG[2] waltz16  
NUC2 1H  
PCPD2 80.00 usec  
PL2 -1.00 dB  
PL12 14.39 dB  
PL13 18.00 dB  
PL2W 12.17476940 W  
PL12W 0.35193357 W  
PL13W 0.15327126 W  
SFO2 400.1316005 MHz

F2 - Processing parameters  
SI 32768  
SF 100.6127321 MHz  
WDW EM  
SSB 0  
LB 1.00 Hz  
GB 0  
PC 1.40

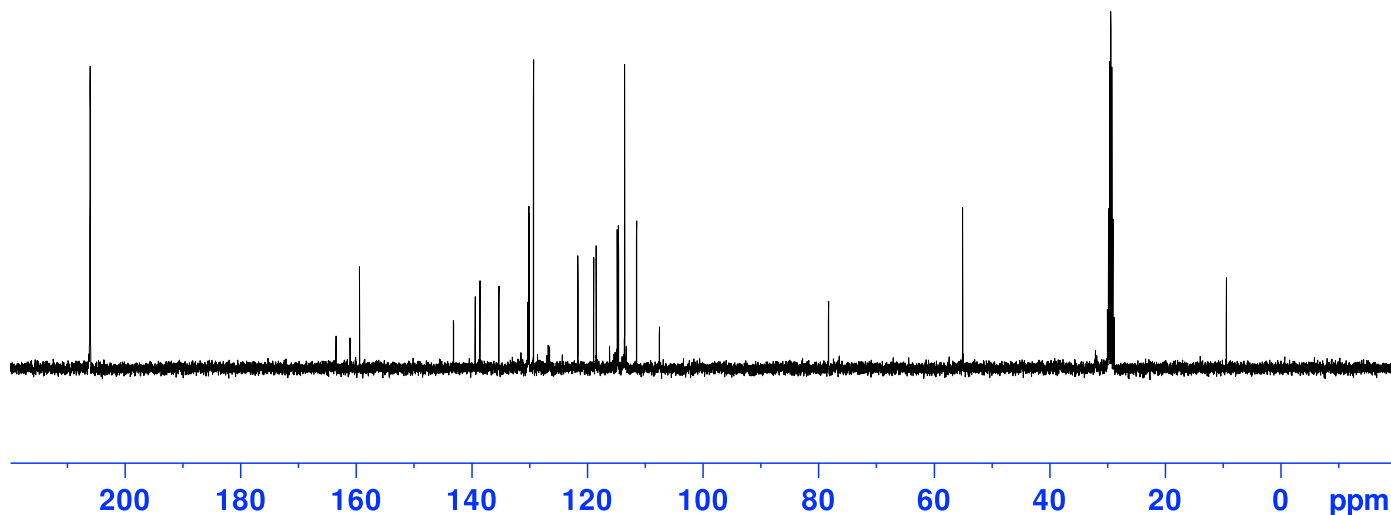



-117.52

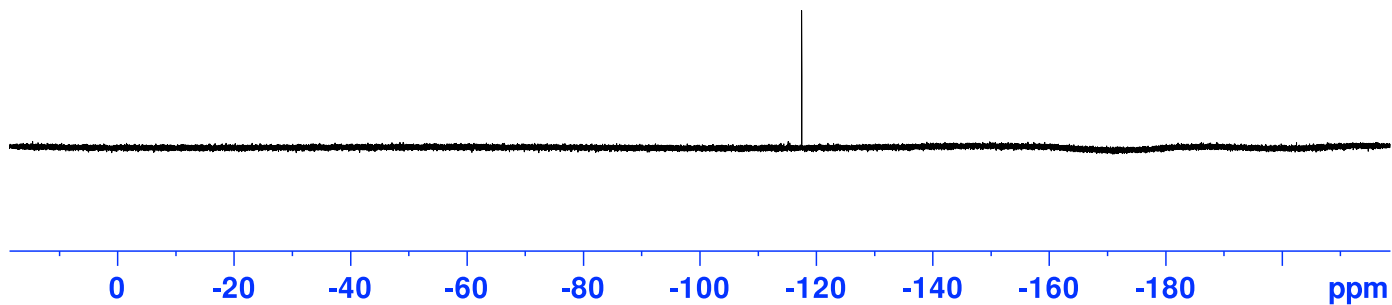

Current Data Parameters  
 NAME YQL-2-183-F  
 EXPNO 1  
 PROCNO 1

F2 - Acquisition Parameters  
 Date\_ 20220308  
 Time 16.20  
 INSTRUM spect  
 PROBHD 5 mm PABBO BB/  
 PULPROG zgflqn  
 TD 131072  
 SOLVENT Acetone  
 NS 16  
 DS 4  
 SWH 89285.711 Hz  
 FIDRES 0.681196 Hz  
 AQ 0.7340032 sec  
 RG 196.92  
 DW 5.600 usec  
 DE 6.50 usec  
 TE 294.6 K  
 D1 1.00000000 sec  
 TD0 1

===== CHANNEL f1 =====  
 SF01 376.4607164 MHz  
 NUC1 19F  
 P1 14.70 usec  
 PLW1 15.99600029 W

F2 - Processing parameters  
 SI 65536  
 SF 376.4983660 MHz  
 WDW EM  
 SSB 0  
 LB 0.30 Hz  
 GB 0  
 PC 1.00

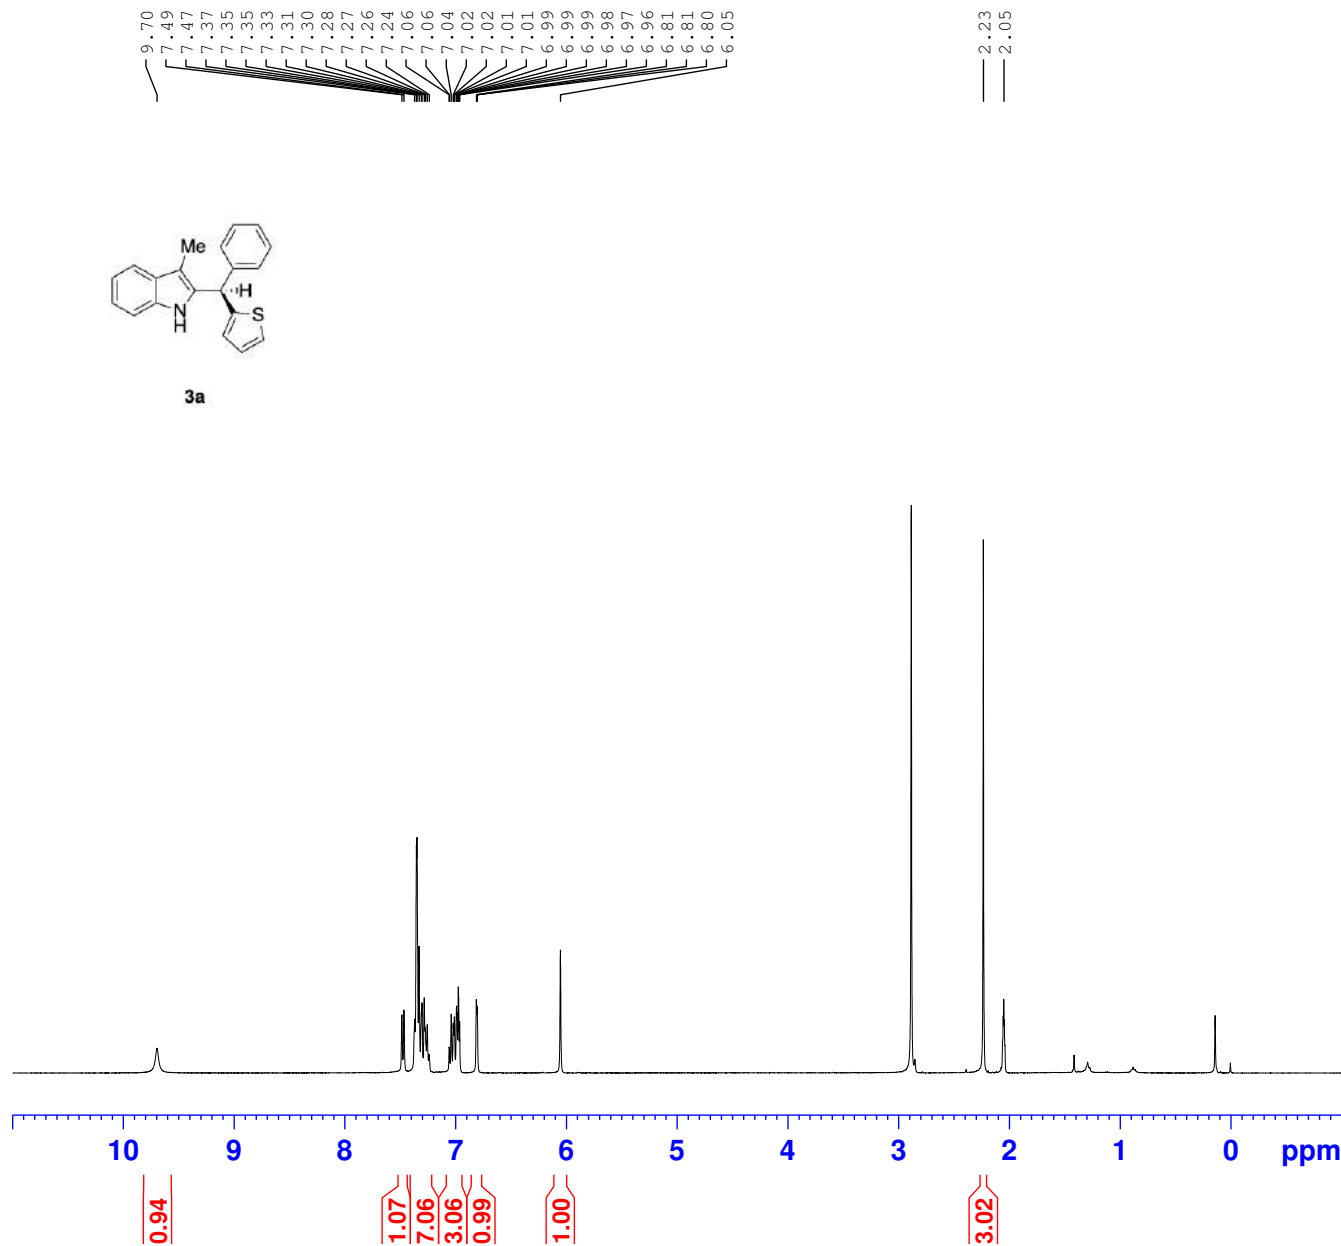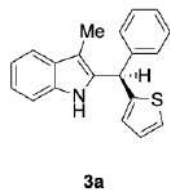

Current Data Parameters  
 NAME YQL-1-146  
 EXPNO 1  
 PROCNO 1

F2 - Acquisition Parameters  
 Date\_ 20210701  
 Time 13.47  
 INSTRUM spect  
 PROBHD 5 mm DUL 13C-1  
 PULPROG zg30  
 TD 65536  
 SOLVENT Acetone  
 NS 8  
 DS 0  
 SWH 8223.685 Hz  
 FIDRES 0.125483 Hz  
 AQ 3.9845889 sec  
 RG 322  
 DW 60.800 usec  
 DE 6.00 usec  
 TE 294.3 K  
 D1 1.00000000 sec  
 TD0 1

==== CHANNEL f1 =====  
 NUC1 1H  
 P1 15.80 usec  
 PL1 -1.00 dB  
 PL1W 12.17476940 W  
 SFO1 400.1324710 MHz

F2 - Processing parameters  
 SI 32768  
 SF 400.1300070 MHz  
 WDW EM  
 SSB 0  
 LB 0.30 Hz  
 GB 0  
 PC 1.00

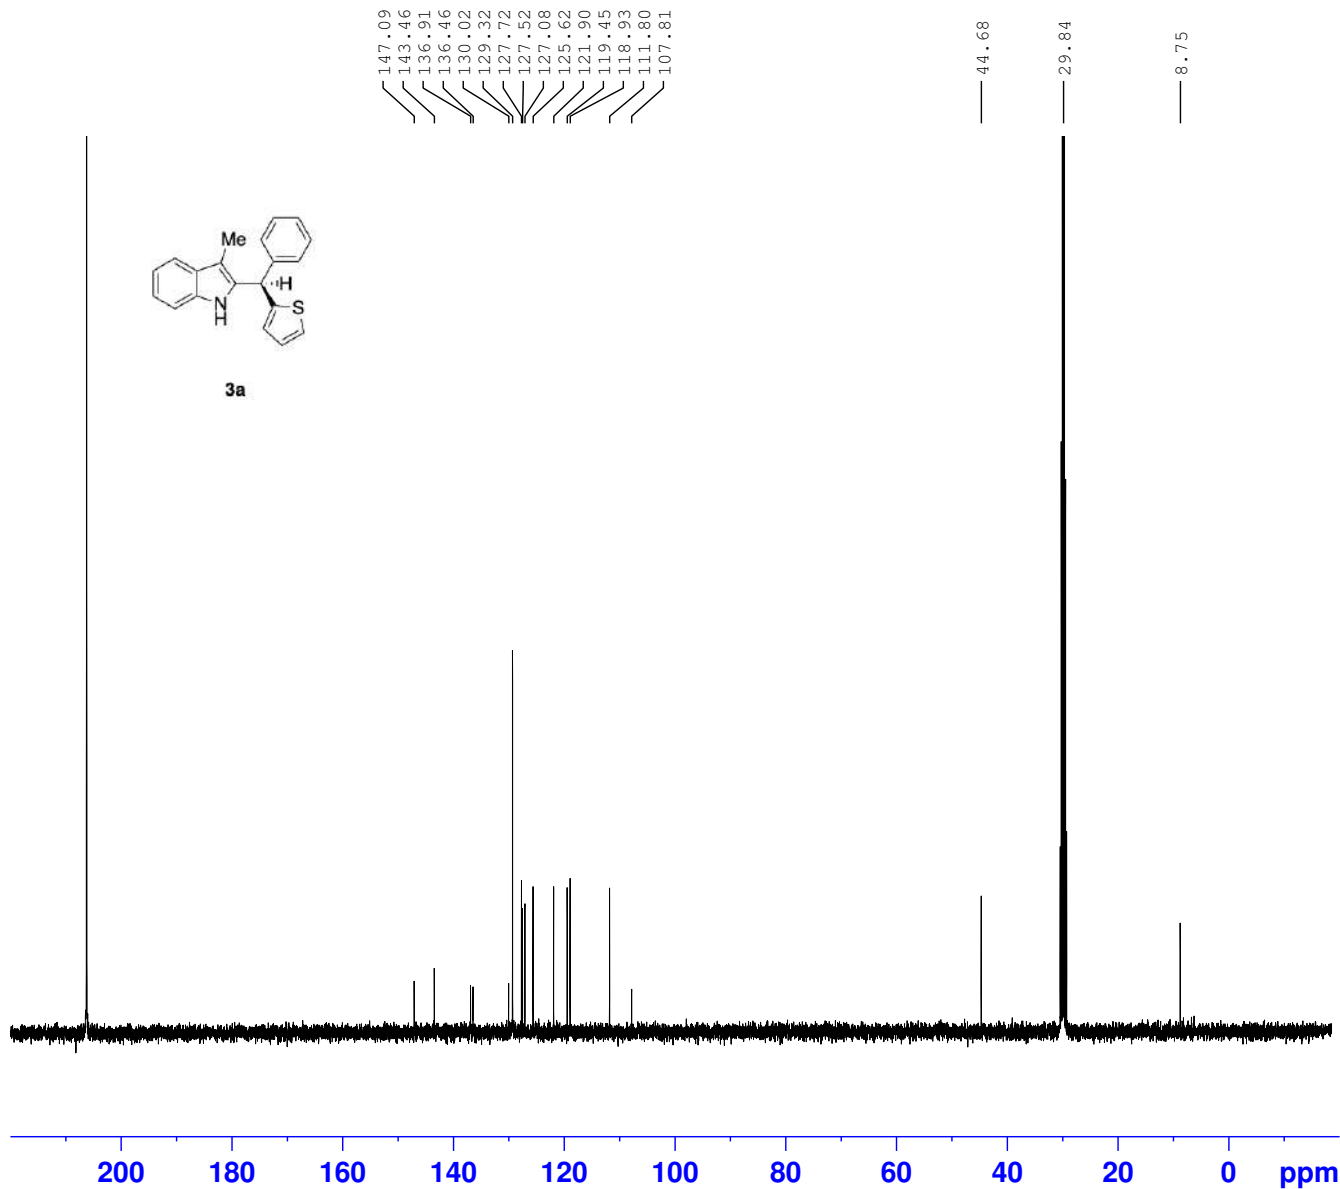

Current Data Parameters  
 NAME YQL-1-146  
 EXPNO 2  
 PROCNO 1

F2 - Acquisition Parameters  
 Date\_ 20210701  
 Time 13.50  
 INSTRUM spect  
 PROBHD 5 mm DUL 13C-1  
 PULPROG zgpg30  
 TD 65536  
 SOLVENT Acetone  
 NS 268  
 DS 1  
 SWH 24038.461 Hz  
 FIDRES 0.366798 Hz  
 AQ 1.3631488 sec  
 RG 2050  
 DW 20.800 usec  
 DE 6.00 usec  
 TE 294.5 K  
 D1 2.00000000 sec  
 D11 0.03000000 sec  
 TD0 1

==== CHANNEL f1 =====  
 NUC1 13C  
 P1 40.00 usec  
 PL1 -3.00 dB  
 PL1W 60.64365387 W  
 SFO1 100.6228298 MHz

==== CHANNEL f2 =====  
 CPDPRG[2] waltz16  
 NUC2 1H  
 PCPD2 80.00 usec  
 PL2 -1.00 dB  
 PL12 14.39 dB  
 PL13 18.00 dB  
 PL2W 12.17476940 W  
 PL12W 0.35193357 W  
 PL13W 0.15327126 W  
 SFO2 400.1316005 MHz

F2 - Processing parameters  
 SI 32768  
 SF 100.6126815 MHz  
 WDW EM  
 SSB 0  
 LB 1.00 Hz  
 GB 0  
 PC 1.40

9.50  
 7.37  
 7.35  
 7.34  
 7.33  
 7.31  
 7.27  
 7.25  
 7.23  
 7.22  
 7.20  
 7.01  
 7.01  
 6.98  
 6.97  
 6.96  
 6.82  
 6.81  
 6.75  
 6.74  
 6.72  
 6.72  
 6.03  
 3.80  
 2.22  
 2.05

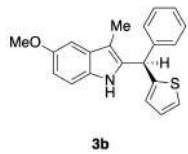

Current Data Parameters  
 NAME YQL-2-3-p  
 EXPNO 1  
 PROCNO 1

F2 - Acquisition Parameters  
 Date\_ 20210725  
 Time 21.57  
 INSTRUM spect  
 PROBHD 5 mm PABBO BB/  
 PULPROG zg30  
 TD 65536  
 SOLVENT Acetone  
 NS 8  
 DS 0  
 SWH 8012.820 Hz  
 FIDRES 0.122266 Hz  
 AQ 4.0894465 sec  
 RG 27.78  
 DW 62.400 usec  
 DE 6.50 usec  
 TE 296.5 K  
 D1 1.00000000 sec  
 TD0 1

==== CHANNEL f1 =====  
 SFO1 400.1324710 MHz  
 NUC1 1H  
 P1 14.50 usec  
 PLW1 11.99499989 W

F2 - Processing parameters  
 SI 65536  
 SF 400.1300077 MHz  
 WDW EM  
 SSB 0  
 LB 0.30 Hz  
 GB 0  
 PC 1.00

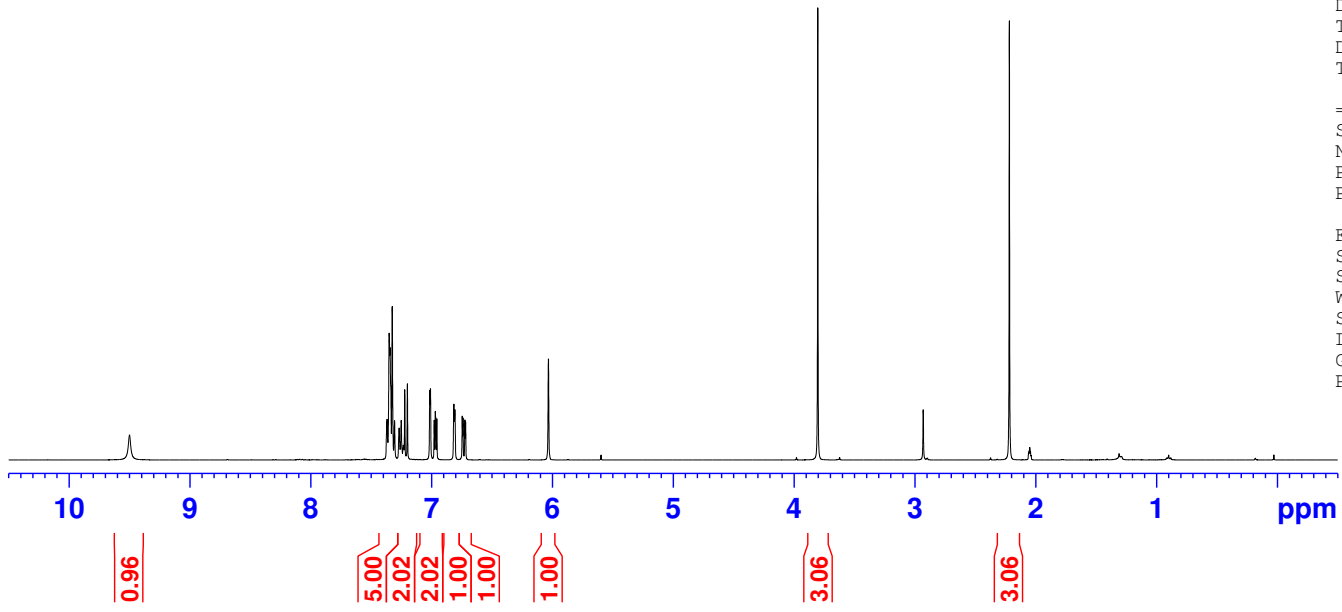

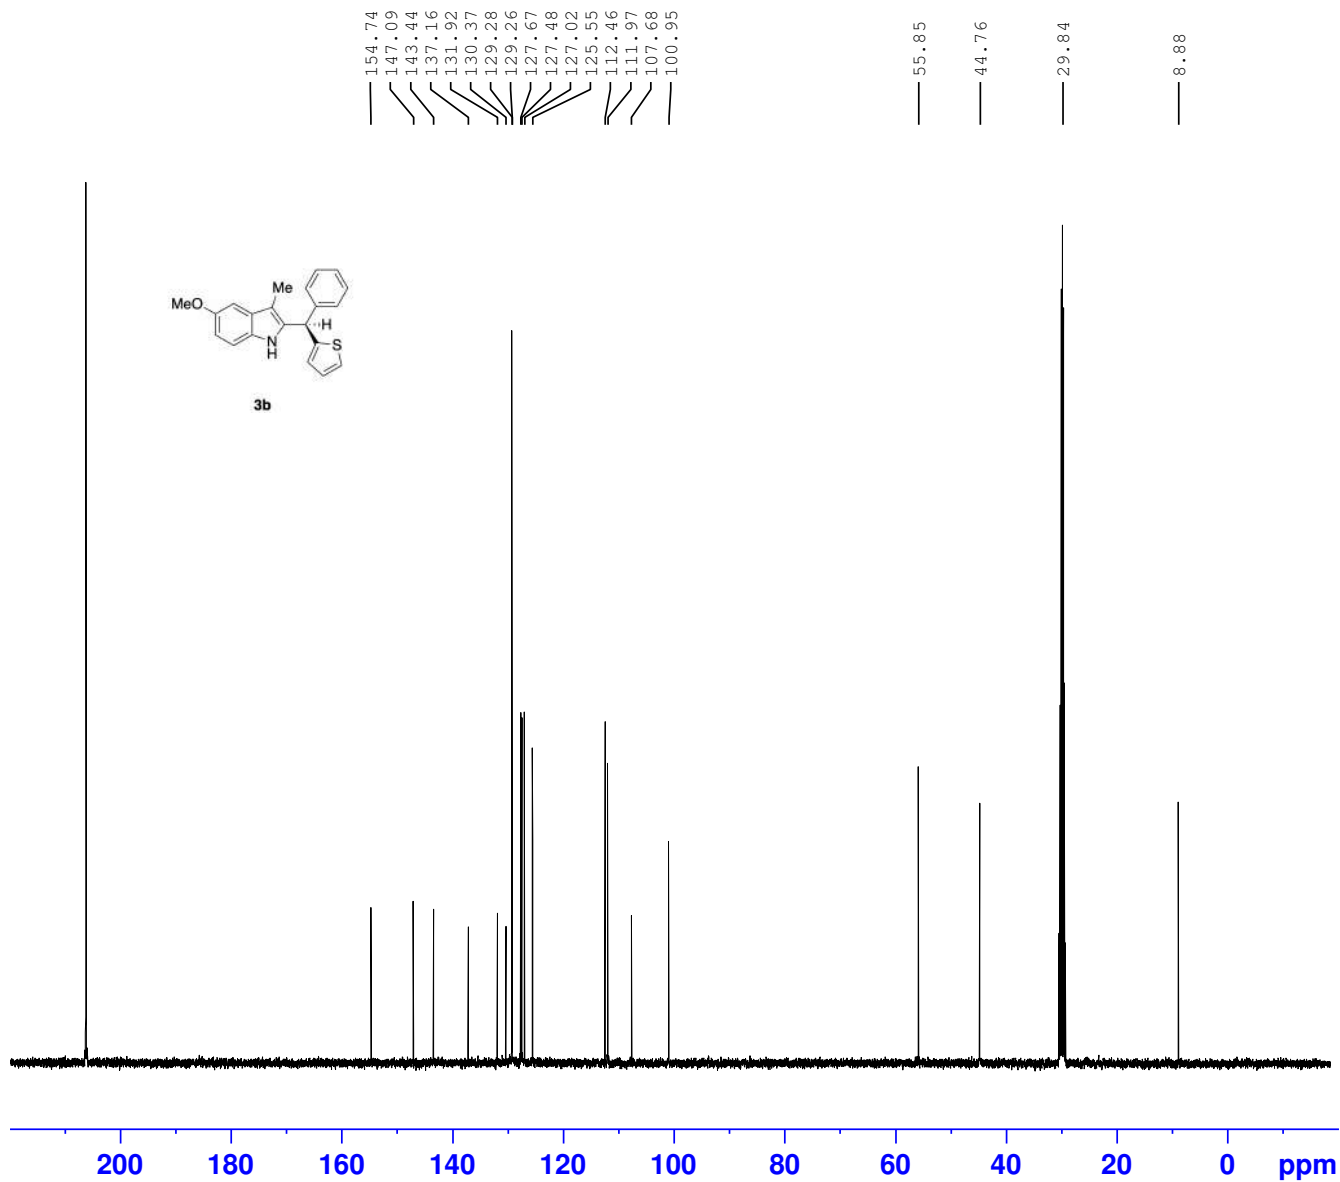

Current Data Parameters  
 NAME YQL-2-3-p  
 EXPNO 2  
 PROCNO 1

F2 - Acquisition Parameters  
 Date\_ 20210725  
 Time 21.59  
 INSTRUM spect  
 PROBHD 5 mm PABBO BB/  
 PULPROG zgpg30  
 TD 65536  
 SOLVENT Acetone  
 NS 67  
 DS 2  
 SWH 24038.461 Hz  
 FIDRES 0.366798 Hz  
 AQ 1.3631488 sec  
 RG 196.92  
 DW 20.800 usec  
 DE 6.50 usec  
 TE 296.8 K  
 D1 2.00000000 sec  
 D11 0.03000000 sec  
 TD0 1

===== CHANNEL f1 =====  
 SFO1 100.6228298 MHz  
 NUC1 13C  
 P1 9.70 usec  
 PLW1 46.98899841 W

===== CHANNEL f2 =====  
 SFO2 400.1316005 MHz  
 NUC2 1H  
 CPDPRG[2] waltz16  
 PCPD2 90.00 usec  
 PLW2 11.99499989 W  
 PLW12 0.34213999 W  
 PLW13 0.27713001 W

F2 - Processing parameters  
 SI 32768  
 SF 100.6126886 MHz  
 WDW EM  
 SSB 0  
 LB 1.00 Hz  
 GB 0  
 PC 1.40

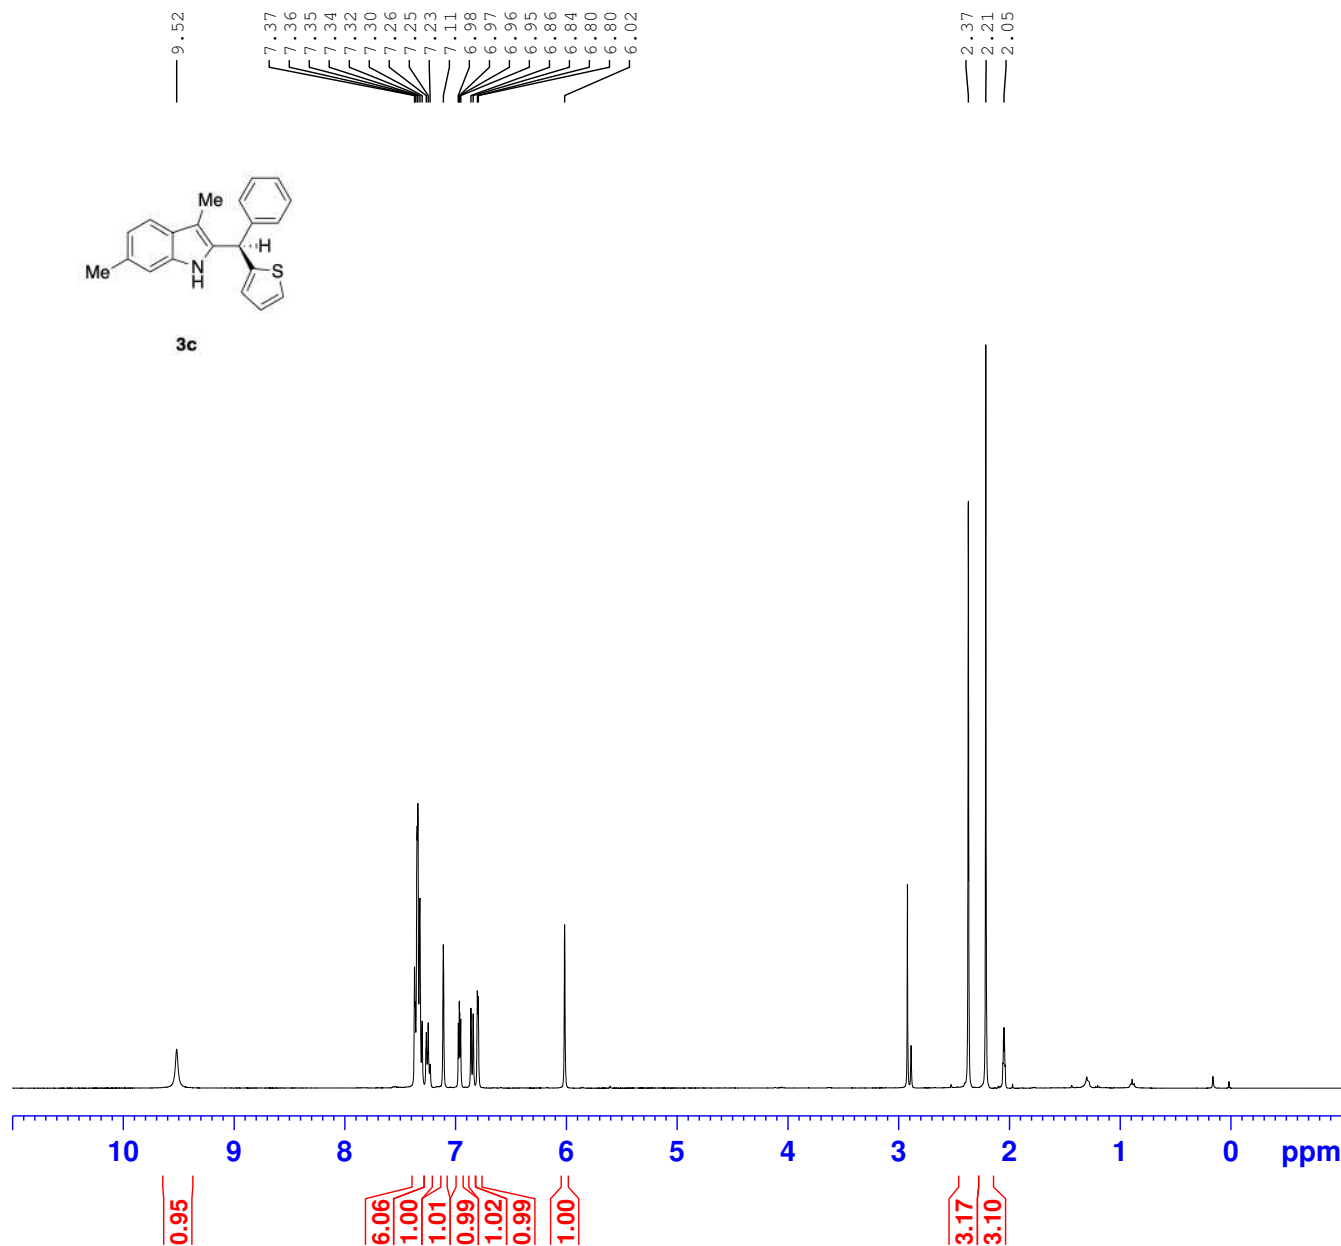

Current Data Parameters  
 NAME YQL-1-158-pdt  
 EXPNO 1  
 PROCNO 1

F2 - Acquisition Parameters  
 Date\_ 20210709  
 Time 22.30  
 INSTRUM spect  
 PROBHD 5 mm DUL 13C-1  
 PULPROG zg30  
 TD 65536  
 SOLVENT Acetone  
 NS 8  
 DS 0  
 SWH 8223.685 Hz  
 FIDRES 0.125483 Hz  
 AQ 3.9845889 sec  
 RG 161  
 DW 60.800 usec  
 DE 6.00 usec  
 TE 294.2 K  
 D1 1.00000000 sec  
 TD0 1

===== CHANNEL f1 =====  
 NUC1 1H  
 P1 15.80 usec  
 PL1 -1.00 dB  
 PLLW 12.17476940 W  
 SFO1 400.1324710 MHz

F2 - Processing parameters  
 SI 32768  
 SF 400.130074 MHz  
 WDW EM  
 SSB 0  
 LB 0.30 Hz  
 GB 0  
 PC 1.00

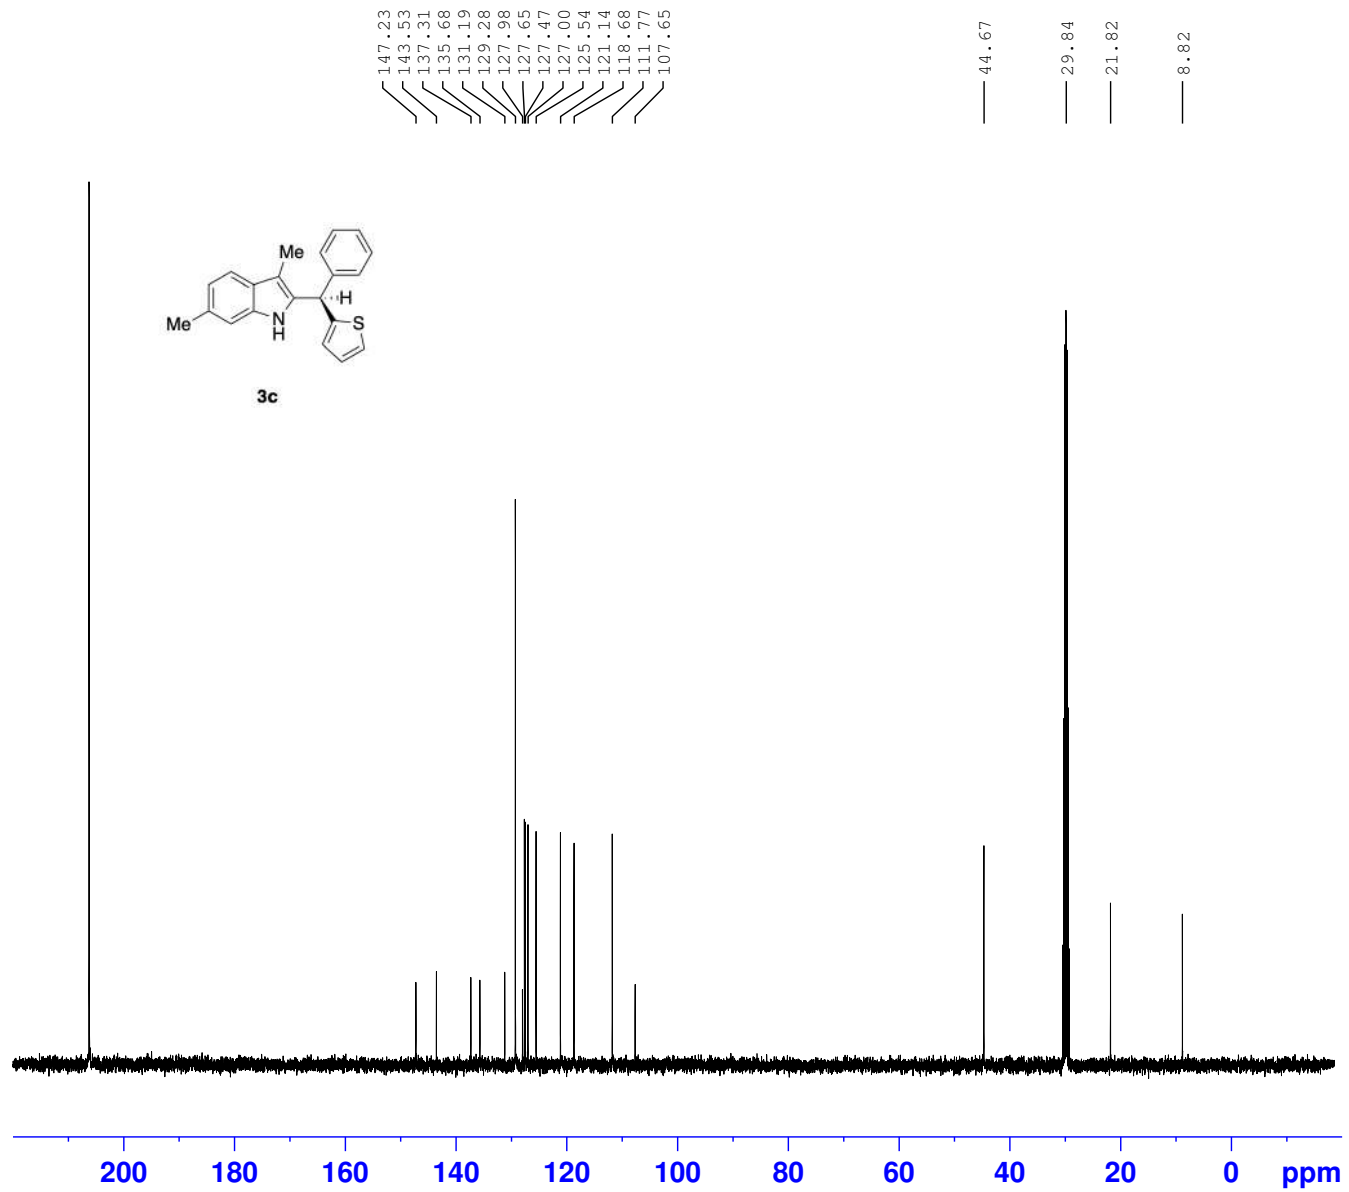

Current Data Parameters  
 NAME YQL-1-158-pdt  
 EXPNO 2  
 PROCNO 1

F2 - Acquisition Parameters  
 Date\_ 20210709  
 Time 22.32  
 INSTRUM spect  
 PROBHD 5 mm DUL 13C-1  
 PULPROG zgpg30  
 TD 65536  
 SOLVENT Acetone  
 NS 121  
 DS 1  
 SWH 24038.461 Hz  
 FIDRES 0.366798 Hz  
 AQ 1.3631488 sec  
 RG 2050  
 DW 20.800 usec  
 DE 6.00 usec  
 TE 294.3 K  
 D1 2.00000000 sec  
 D11 0.03000000 sec  
 TD0 1

==== CHANNEL f1 =====  
 NUC1 13C  
 P1 40.00 usec  
 PL1 -3.00 dB  
 PL1W 60.64365387 W  
 SFO1 100.6228298 MHz

==== CHANNEL f2 =====  
 CPDPRG[2] waltz16  
 NUC2 1H  
 PCPD2 80.00 usec  
 PL2 -1.00 dB  
 PL12 14.39 dB  
 PL13 18.00 dB  
 PL2W 12.17476940 W  
 PL12W 0.35193357 W  
 PL13W 0.15327126 W  
 SFO2 400.1316005 MHz

F2 - Processing parameters  
 SI 32768  
 SF 100.6126856 MHz  
 WDW EM  
 SSB 0  
 LB 1.00 Hz  
 GB 0  
 PC 1.40



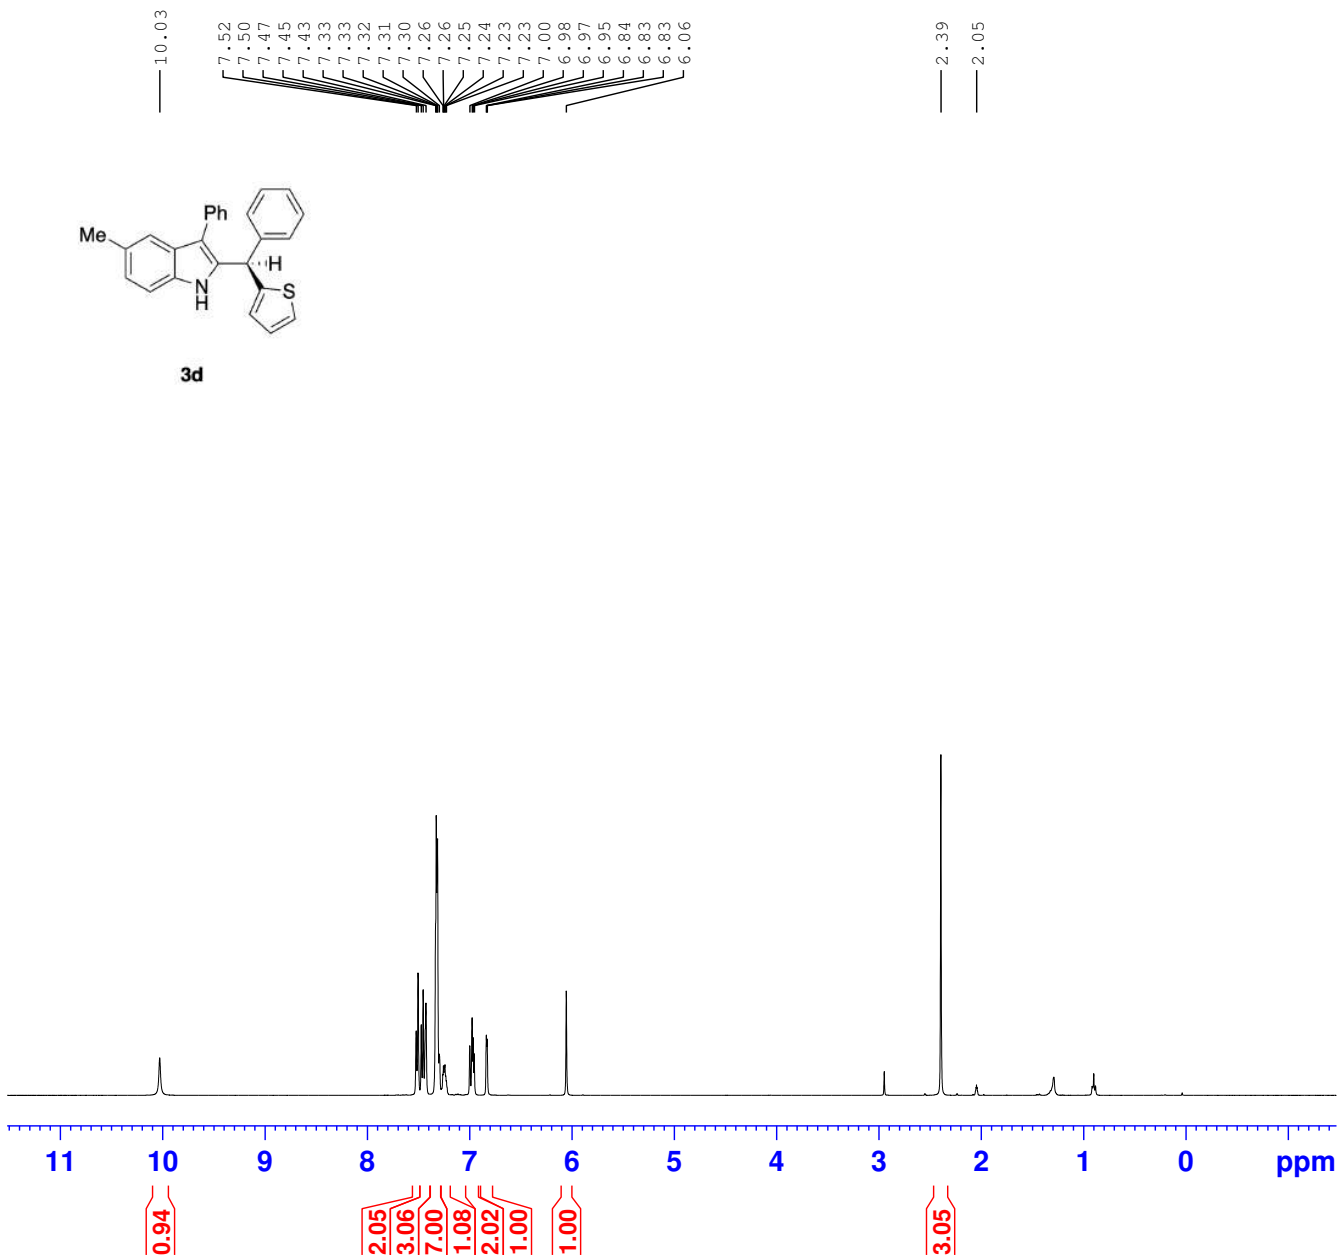

Current Data Parameters  
 NAME YQL-1-155-P  
 EXPNO 1  
 PROCNO 1

F2 - Acquisition Parameters  
 Date\_ 20210707  
 Time 23.05  
 INSTRUM spect  
 PROBHD 5 mm DUL 13C-1  
 PULPROG zg30  
 TD 65536  
 SOLVENT Acetone  
 NS 8  
 DS 0  
 SWH 8223.685 Hz  
 FIDRES 0.125483 Hz  
 AQ 3.9845889 sec  
 RG 64  
 DW 60.800 usec  
 DE 6.00 usec  
 TE 293.9 K  
 D1 1.0000000 sec  
 TD0 1

==== CHANNEL f1 =====  
 NUC1 1H  
 P1 15.80 usec  
 PL1 -1.00 dB  
 PLLW 12.17476940 W  
 SFO1 400.1324710 MHz

F2 - Processing parameters  
 SI 32768  
 SF 400.1300085 MHz  
 WDW EM  
 SSB 0  
 LB 0.30 Hz  
 GB 0  
 PC 1.00

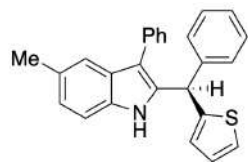

**3d**

147.15  
143.47  
136.69  
136.17  
135.64  
130.38  
129.40  
129.36  
129.18  
128.46  
127.79  
127.58  
127.26  
126.96  
125.74  
124.24  
119.33  
115.24  
111.97

44.54  
29.84  
21.68

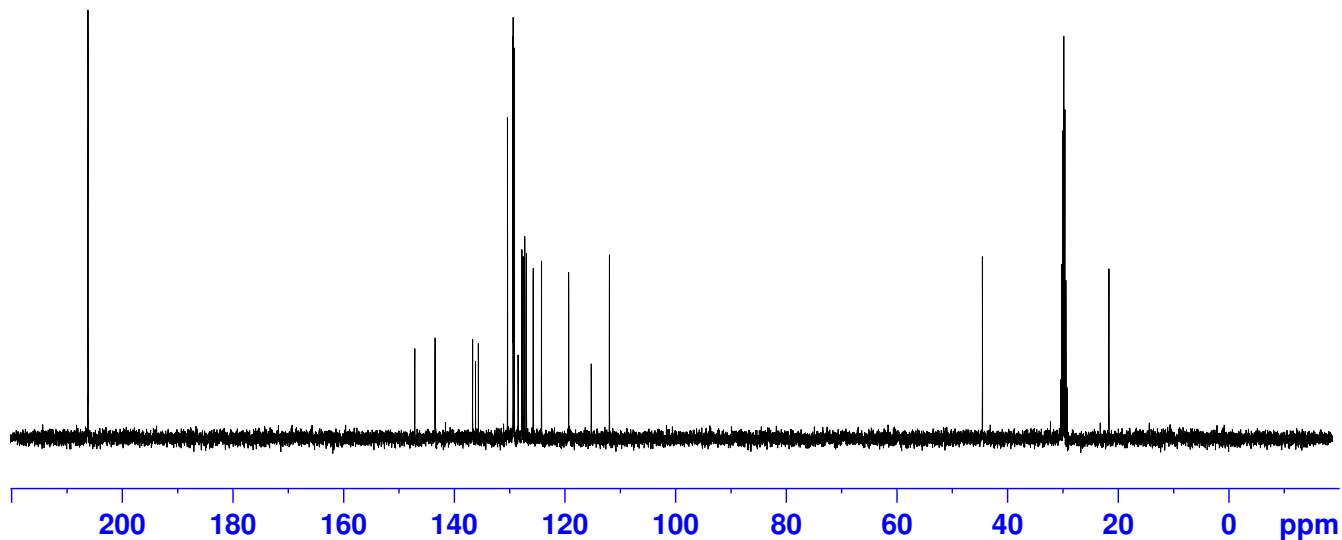

Current Data Parameters  
NAME YQL-1-155-P  
EXPNO 3  
PROCNO 1

F2 - Acquisition Parameters  
Date\_ 20210707  
Time 23.24  
INSTRUM spect  
PROBHD 5 mm DUL 13C-1  
PULPROG zgpg30  
TD 65536  
SOLVENT Acetone  
NS 31  
DS 1  
SWH 24038.461 Hz  
FIDRES 0.366798 Hz  
AQ 1.3631488 sec  
RG 2050  
DW 20.800 usec  
DE 6.00 usec  
TE 294.4 K  
D1 2.0000000 sec  
D11 0.0300000 sec  
TD0 1

==== CHANNEL f1 =====  
NUC1 13C  
P1 40.00 usec  
PL1 -3.00 dB  
PL1W 60.64365387 W  
SFO1 100.6228298 MHz

==== CHANNEL f2 =====  
CPDPRG[2] waltz16  
NUC2 1H  
PCPD2 80.00 usec  
PL2 -1.00 dB  
PL12 14.39 dB  
PL13 18.00 dB  
PL2W 12.17476940 W  
PL12W 0.35193357 W  
PL13W 0.15327126 W  
SFO2 400.1316005 MHz

F2 - Processing parameters  
SI 32768  
SF 100.6126916 MHz  
WDW EM  
SSB 0  
LB 1.00 Hz  
GB 0  
PC 1.40

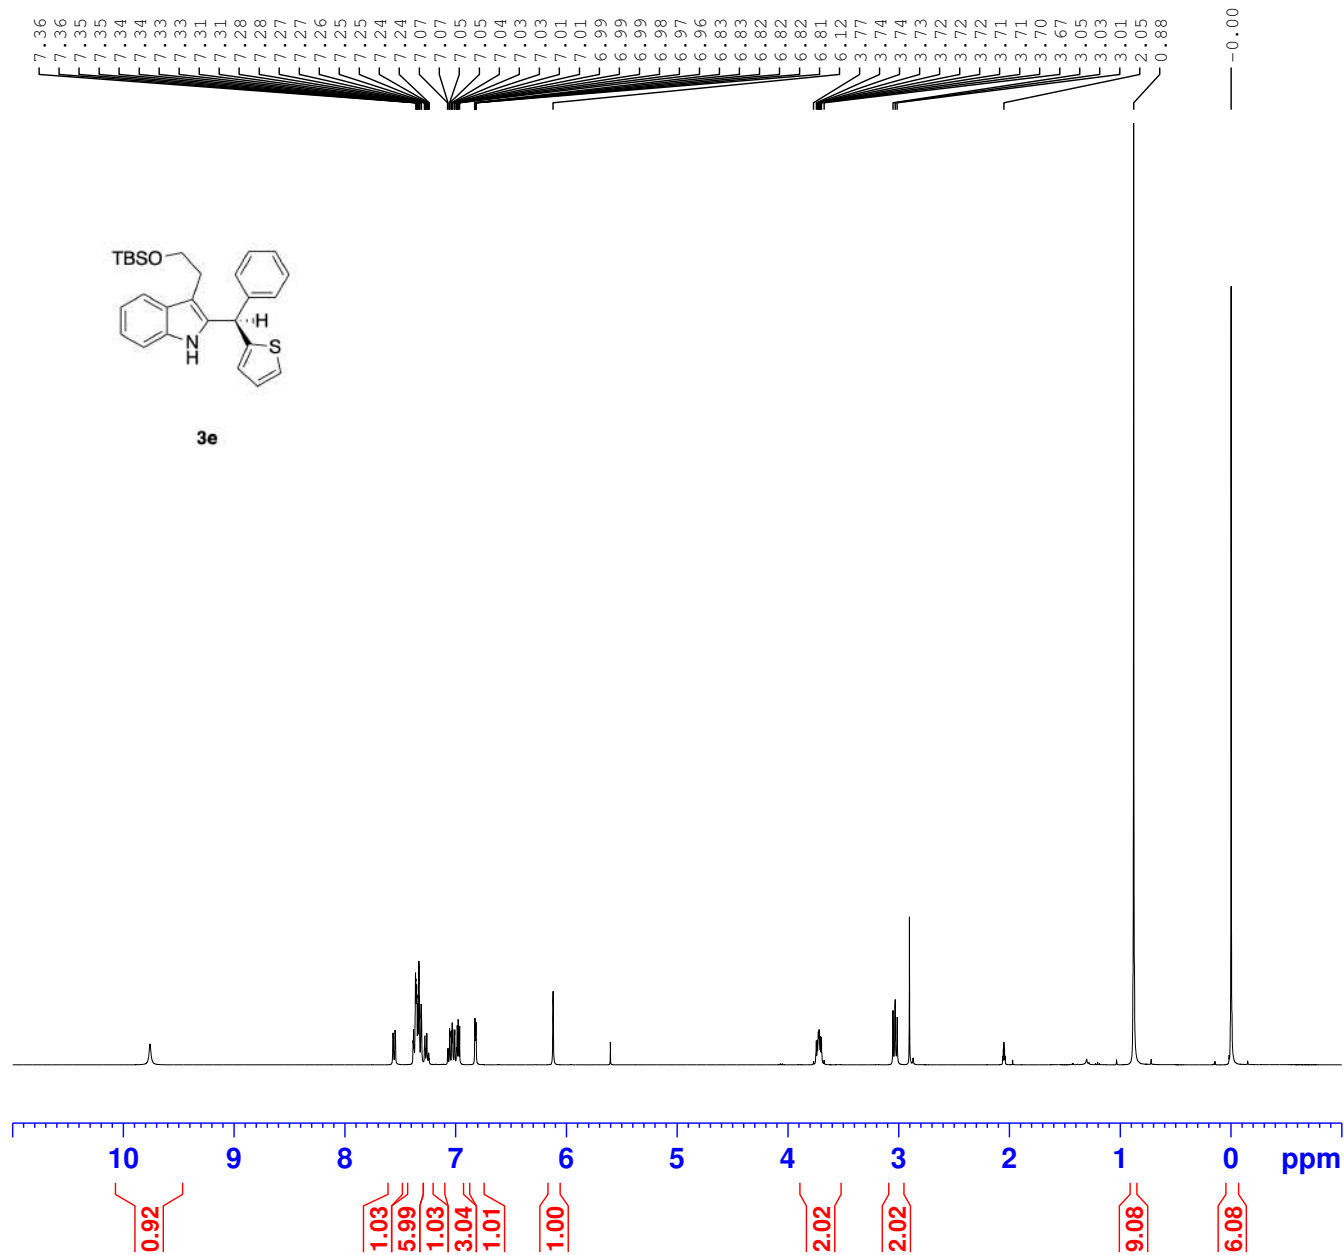

Current Data Parameters  
 NAME YQL-2-37-P  
 EXPNO 1  
 PROCNO 1

F2 - Acquisition Parameters  
 Date\_ 20210821  
 Time 10.01  
 INSTRUM spect  
 PROBHD 5 mm DUL 13C-1  
 PULPROG zg30  
 TD 65536  
 SOLVENT Acetone  
 NS 8  
 DS 0  
 SWH 8223.685 Hz  
 FIDRES 0.125483 Hz  
 AQ 3.9845889 sec  
 RG 101  
 DW 60.800 usec  
 DE 6.00 usec  
 TE 300.0 K  
 D1 1.00000000 sec  
 TD0 1

==== CHANNEL f1 =====  
 NUC1 1H  
 P1 15.80 usec  
 PL1 -1.00 dB  
 PL1W 12.17476940 W  
 SFO1 400.1324710 MHz

F2 - Processing parameters  
 SI 32768  
 SF 400.1300069 MHz  
 WDW EM  
 SSB 0  
 LB 0.30 Hz  
 GB 0  
 PC 1.00

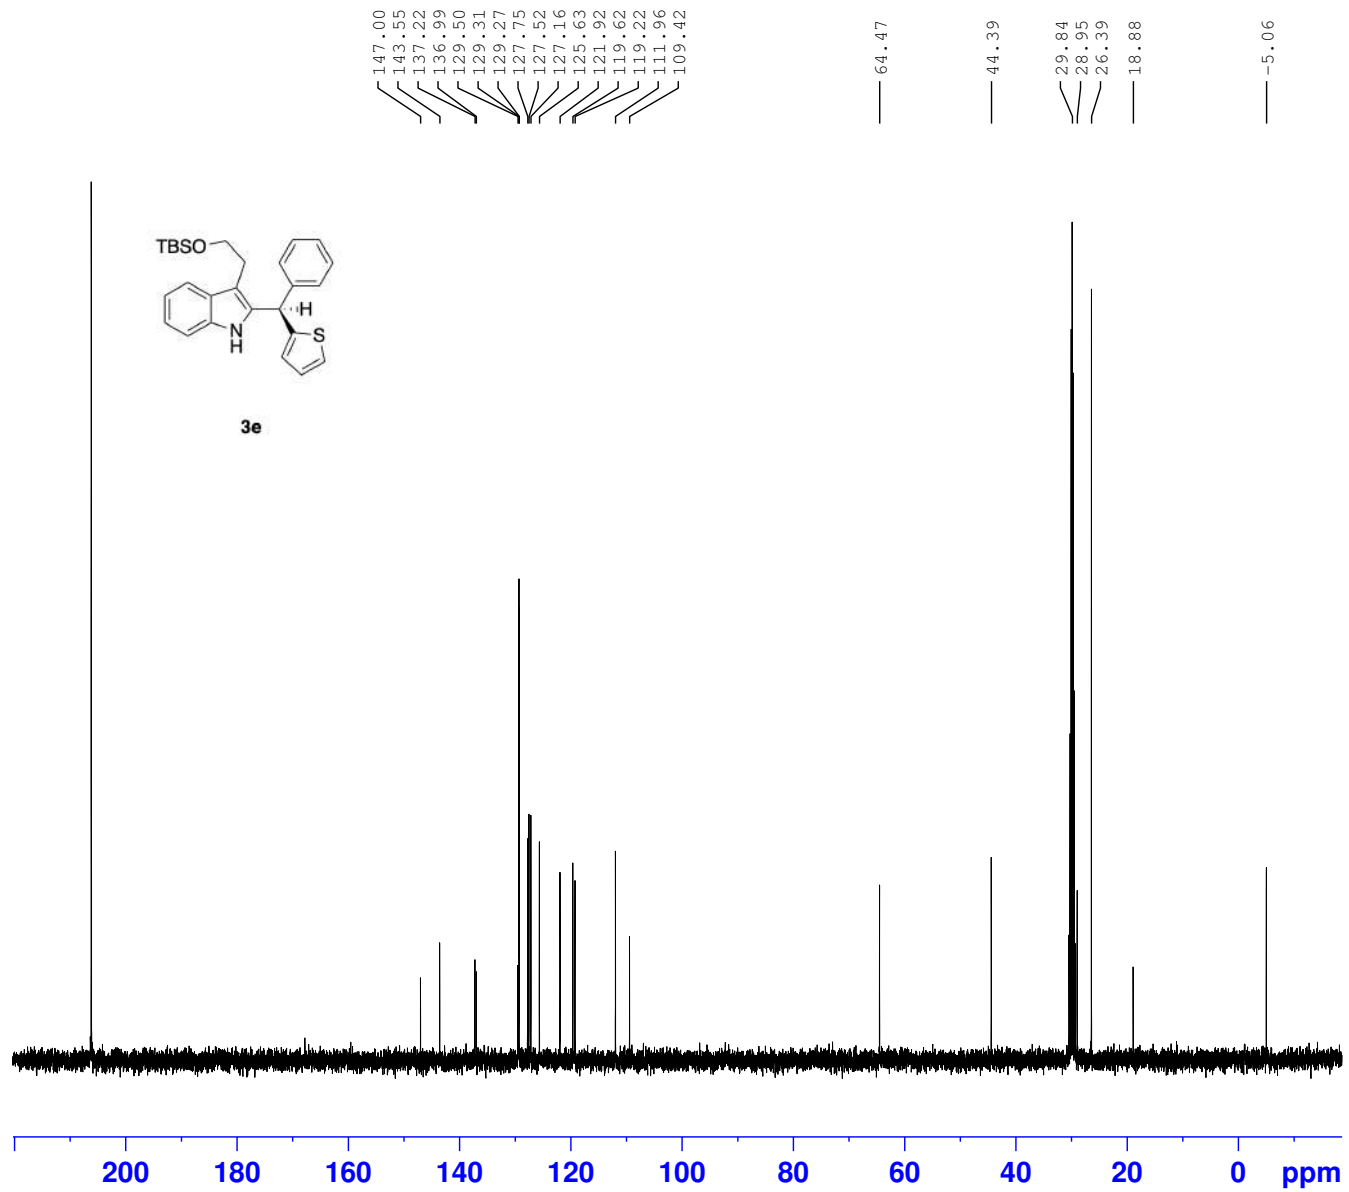

Current Data Parameters  
 NAME YQL-2-37-P  
 EXPNO 2  
 PROCNO 1

F2 - Acquisition Parameters  
 Date\_ 20210821  
 Time 10.04  
 INSTRUM spect  
 PROBHD 5 mm DUL 13C-1  
 PULPROG zgpg30  
 TD 65536  
 SOLVENT Acetone  
 NS 126  
 DS 1  
 SWH 24038.461 Hz  
 FIDRES 0.366798 Hz  
 AQ 1.3631488 sec  
 RG 2050  
 DW 20.800 usec  
 DE 6.00 usec  
 TE 300.0 K  
 D1 2.00000000 sec  
 D11 0.03000000 sec  
 TD0 1

==== CHANNEL f1 =====  
 NUC1 13C  
 P1 40.00 usec  
 PL1 -3.00 dB  
 PL1W 60.64365387 W  
 SFO1 100.6228298 MHz

==== CHANNEL f2 =====  
 CPDPRG[2] waltz16  
 NUC2 1H  
 PCPD2 80.00 usec  
 PL2 -1.00 dB  
 PL12 14.39 dB  
 PL13 18.00 dB  
 PL2W 12.17476940 W  
 PL12W 0.35193357 W  
 PL13W 0.15327126 W  
 SFO2 400.1316005 MHz

F2 - Processing parameters  
 SI 32768  
 SF 100.6126867 MHz  
 WDW EM  
 SSB 0  
 LB 1.00 Hz  
 GB 0  
 PC 1.40

10.13  
7.50  
7.48  
7.38  
7.37  
7.36  
7.34  
7.34  
7.33  
7.29  
7.28  
7.28  
7.27  
7.26  
7.25  
7.25  
7.08  
7.06  
7.04  
7.04  
7.01  
7.01  
6.99  
6.98  
6.97  
6.89  
6.88  
6.18  
6.18  
5.93

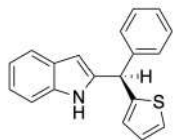

3f

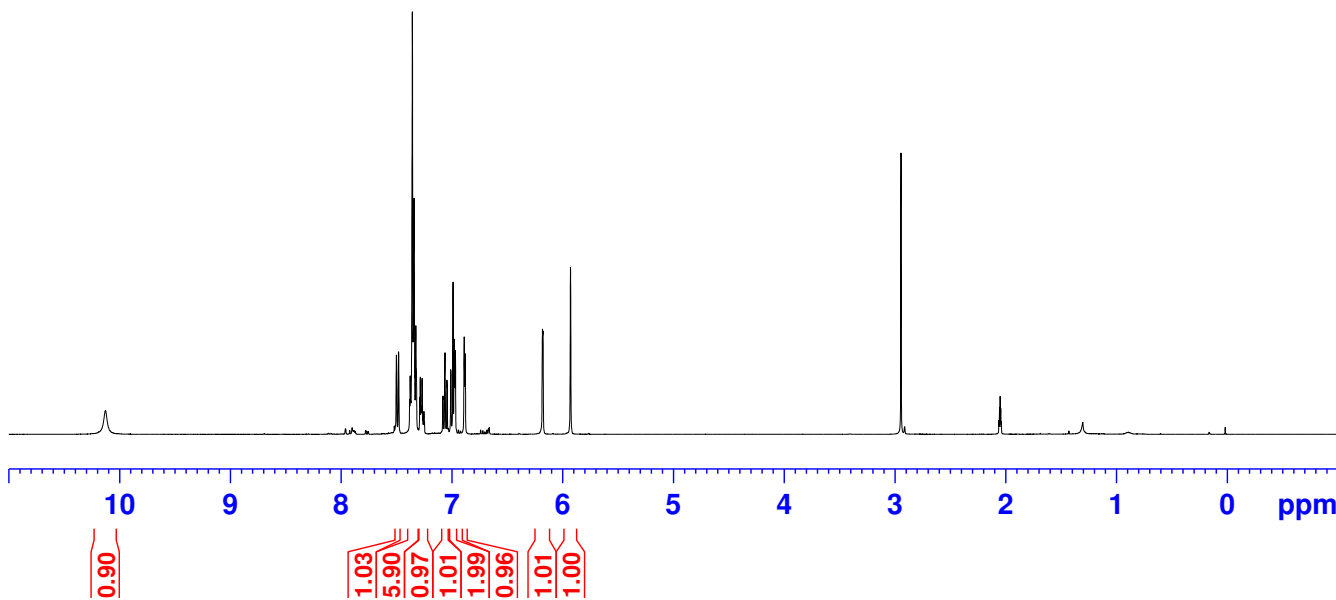

2.05

Current Data Parameters  
NAME YQL-1-156-  
EXPNO 1  
PROCNO 1

F2 - Acquisition Parameters  
Date\_ 20210806  
Time 14.48  
INSTRUM spect  
PROBHD 5 mm DUL 13C-1  
PULPROG zg30  
TD 65536  
SOLVENT Acetone  
NS 8  
DS 0  
SWH 8223.685 Hz  
FIDRES 0.125483 Hz  
AQ 3.9845889 sec  
RG 161  
DW 60.800 usec  
DE 6.00 usec  
TE 293.4 K  
D1 1.00000000 sec  
TD0 1

===== CHANNEL f1 =====  
NUC1 1H  
P1 15.80 usec  
PL1 -1.00 dB  
PL1W 12.17476940 W  
SFO1 400.1324710 MHz

F2 - Processing parameters  
SI 32768  
SF 400.1300069 MHz  
WDW EM  
SSB 0  
LB 0.30 Hz  
GB 0  
PC 1.00

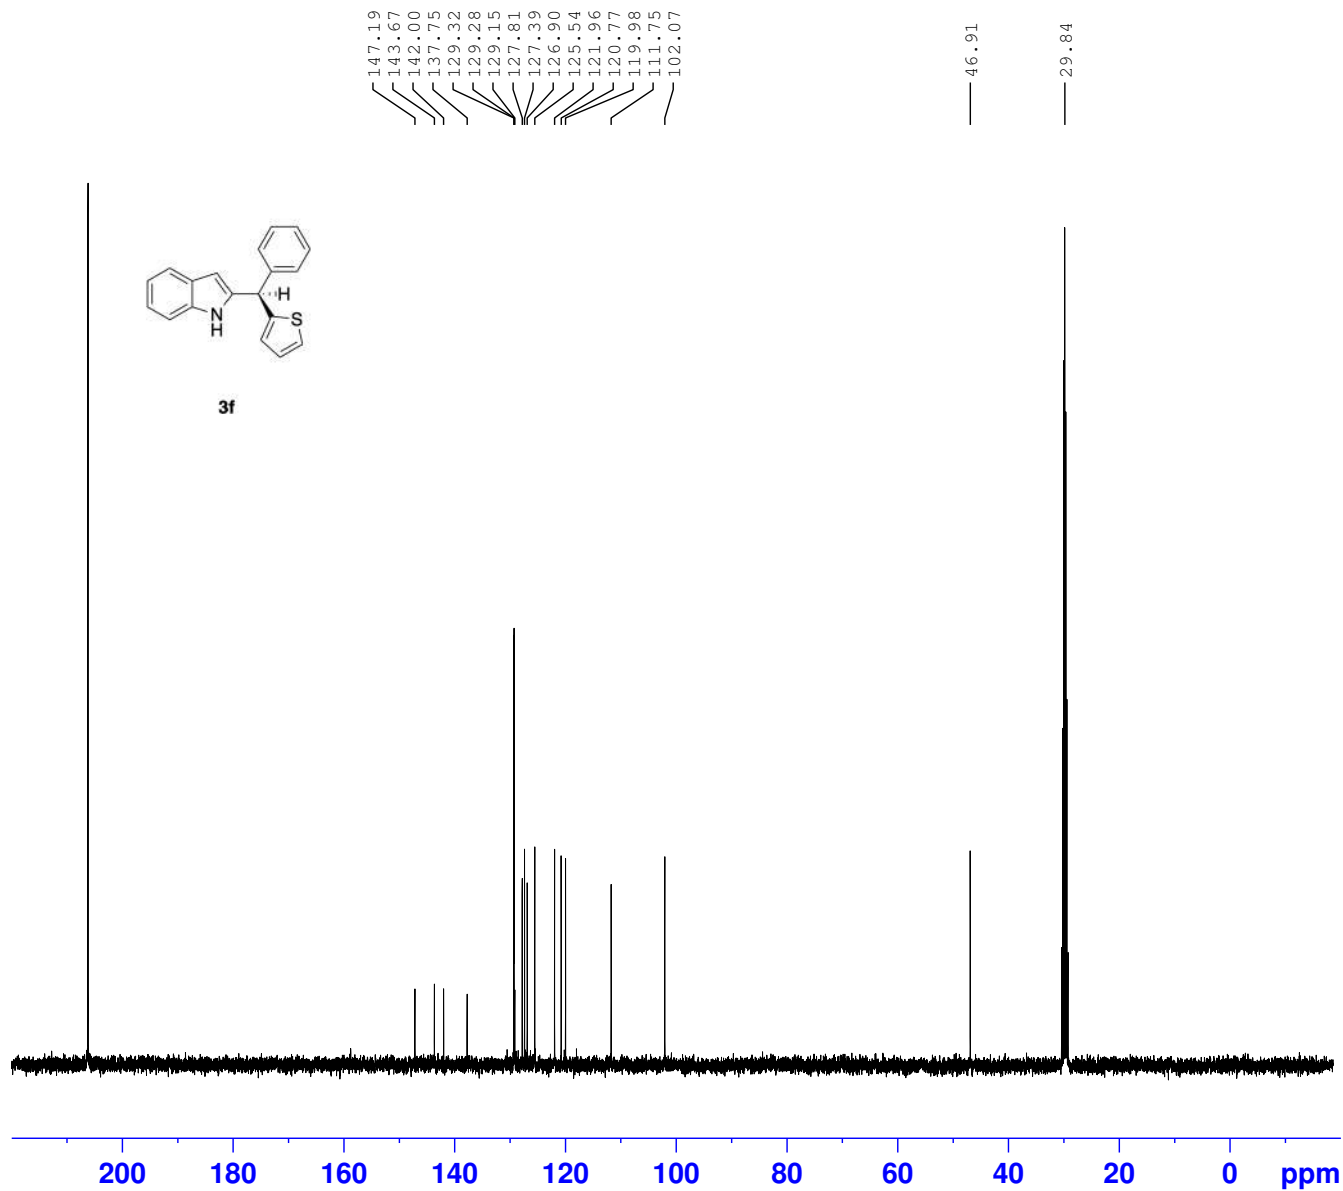

Current Data Parameters  
 NAME YQL-1-156-P  
 EXPNO 2  
 PROCNO 1

F2 - Acquisition Parameters  
 Date\_ 20210707  
 Time 23.20  
 INSTRUM spect  
 PROBHD 5 mm DUL 13C-1  
 PULPROG zgpg30  
 TD 65536  
 SOLVENT Acetone  
 NS 80  
 DS 1  
 SWH 24038.461 Hz  
 FIDRES 0.366798 Hz  
 AQ 1.3631488 sec  
 RG 2050  
 DW 20.800 usec  
 DE 6.00 usec  
 TE 294.4 K  
 D1 2.00000000 sec  
 D11 0.03000000 sec  
 TD0 1

==== CHANNEL f1 =====  
 NUC1 13C  
 P1 40.00 usec  
 PL1 -3.00 dB  
 PL1W 60.64365387 W  
 SFO1 100.6228298 MHz

==== CHANNEL f2 =====  
 CPDPRG[2] waltz16  
 NUC2 1H  
 PCPD2 80.00 usec  
 PL2 -1.00 dB  
 PL12 14.39 dB  
 PL13 18.00 dB  
 PL2W 12.17476940 W  
 PL12W 0.35193357 W  
 PL13W 0.15327126 W  
 SFO2 400.1316005 MHz

F2 - Processing parameters  
 SI 32768  
 SF 100.6126859 MHz  
 WDW EM  
 SSB 0  
 LB 1.00 Hz  
 GB 0  
 PC 1.40

9.71  
7.52  
7.50  
7.40  
7.39  
7.38  
7.36  
7.35  
7.34  
7.33  
7.31  
7.13  
7.10  
7.10  
7.08  
7.08  
7.06  
7.05  
7.04  
7.03  
7.01  
6.99  
6.98  
6.98  
6.97  
6.83  
6.82  
6.82  
6.09

2.25  
2.05

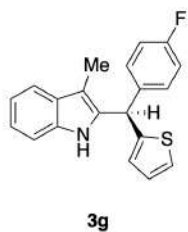

Current Data Parameters  
NAME YQL-2-1-p  
EXPNO 1  
PROCNO 1

F2 - Acquisition Parameters  
Date\_ 20210725  
Time 21.45  
INSTRUM spect  
PROBHD 5 mm PABBO BB/  
PULPROG zg30  
TD 65536  
SOLVENT Acetone  
NS 8  
DS 0  
SWH 8012.820 Hz  
FIDRES 0.122266 Hz  
AQ 4.0894465 sec  
RG 27.78  
DW 62.400 usec  
DE 6.50 usec  
TE 296.4 K  
D1 1.00000000 sec  
TD0 1

==== CHANNEL f1 =====  
SFO1 400.1324710 MHz  
NUC1 1H  
P1 14.50 usec  
PLW1 11.99499989 W

F2 - Processing parameters  
SI 65536  
SF 400.1300070 MHz  
WDW EM  
SSB 0  
LB 0.30 Hz  
GB 0  
PC 1.00

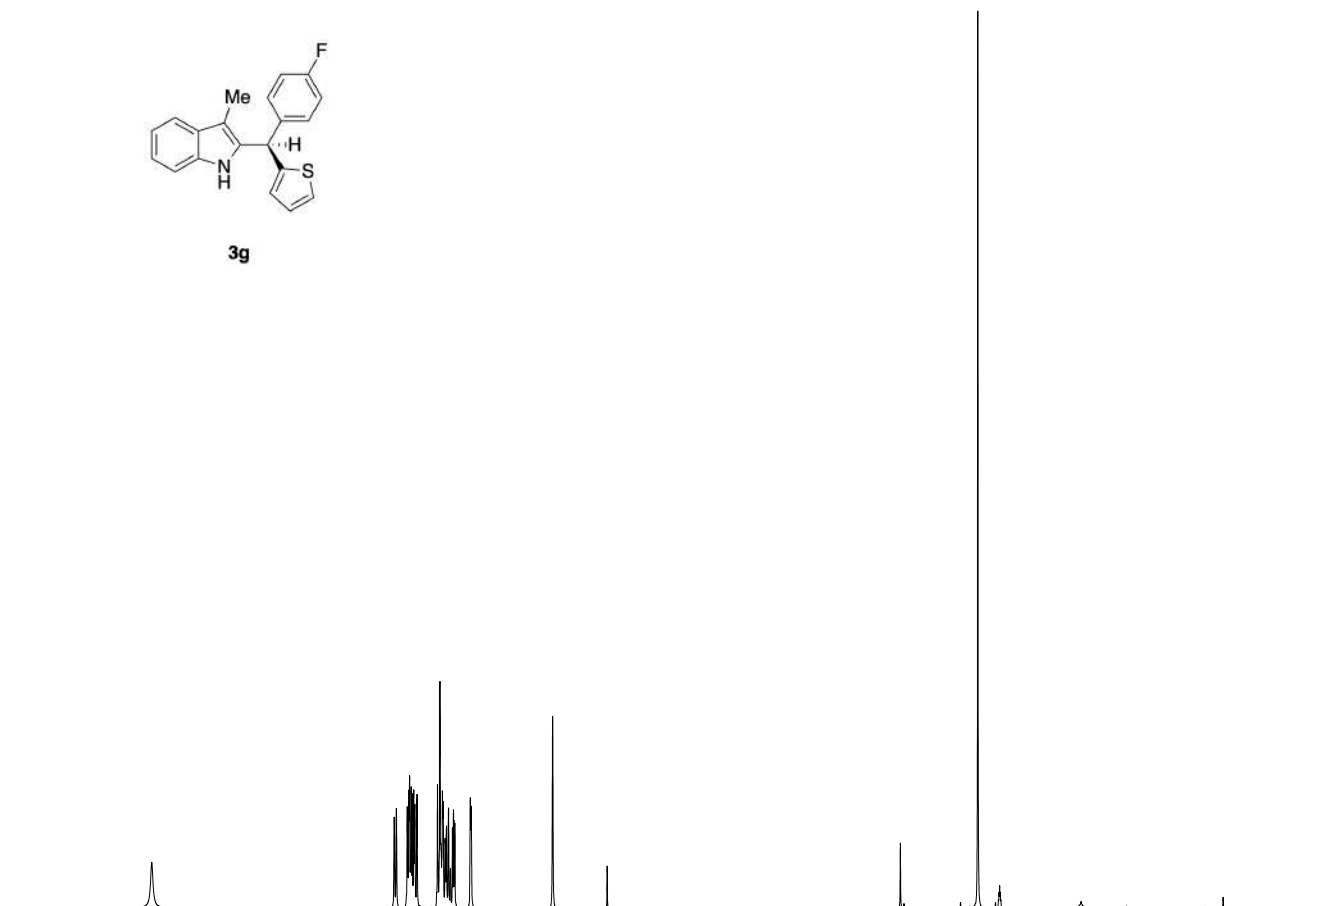

0.96

1.03

4.00

5.05

1.02

1.00

3.06

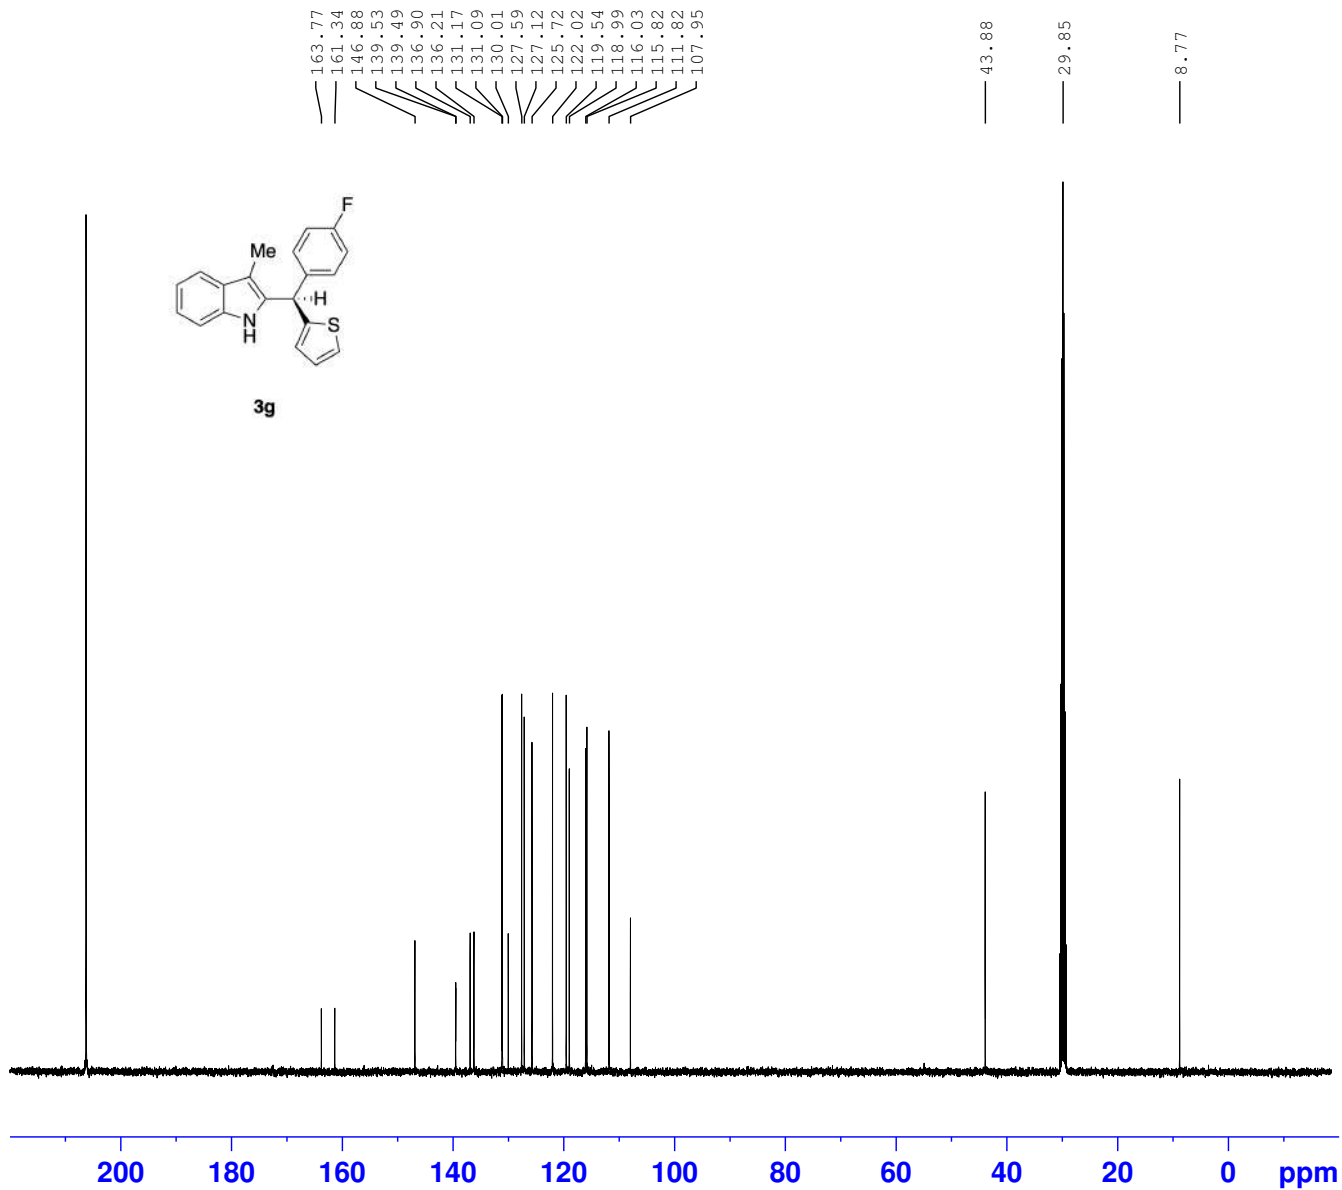

Current Data Parameters  
 NAME YQL-2-1-p  
 EXPNO 3  
 PROCNO 1

F2 - Acquisition Parameters  
 Date\_ 20210725  
 Time 21.50  
 INSTRUM spect  
 PROBHD 5 mm PABBO BB/  
 PULPROG zgpg30  
 TD 65536  
 SOLVENT Acetone  
 NS 75  
 DS 2  
 SWH 24038.461 Hz  
 FIDRES 0.366798 Hz  
 AQ 1.3631488 sec  
 RG 196.92  
 DW 20.800 usec  
 DE 6.50 usec  
 TE 296.6 K  
 D1 2.00000000 sec  
 D11 0.03000000 sec  
 TD0 1

==== CHANNEL f1 =====  
 SFO1 100.6228298 MHz  
 NUC1 13C  
 P1 9.70 usec  
 PLW1 46.98899841 W

==== CHANNEL f2 =====  
 SFO2 400.1316005 MHz  
 NUC2 1H  
 CPDPRG[2] waltz16  
 PCPD2 90.00 usec  
 PLW2 11.99499989 W  
 PLW12 0.34213999 W  
 PLW13 0.27713001 W

F2 - Processing parameters  
 SI 32768  
 SF 100.6126872 MHz  
 WDW EM  
 SSB 0  
 LB 1.00 Hz  
 GB 0  
 PC 1.40



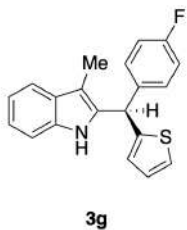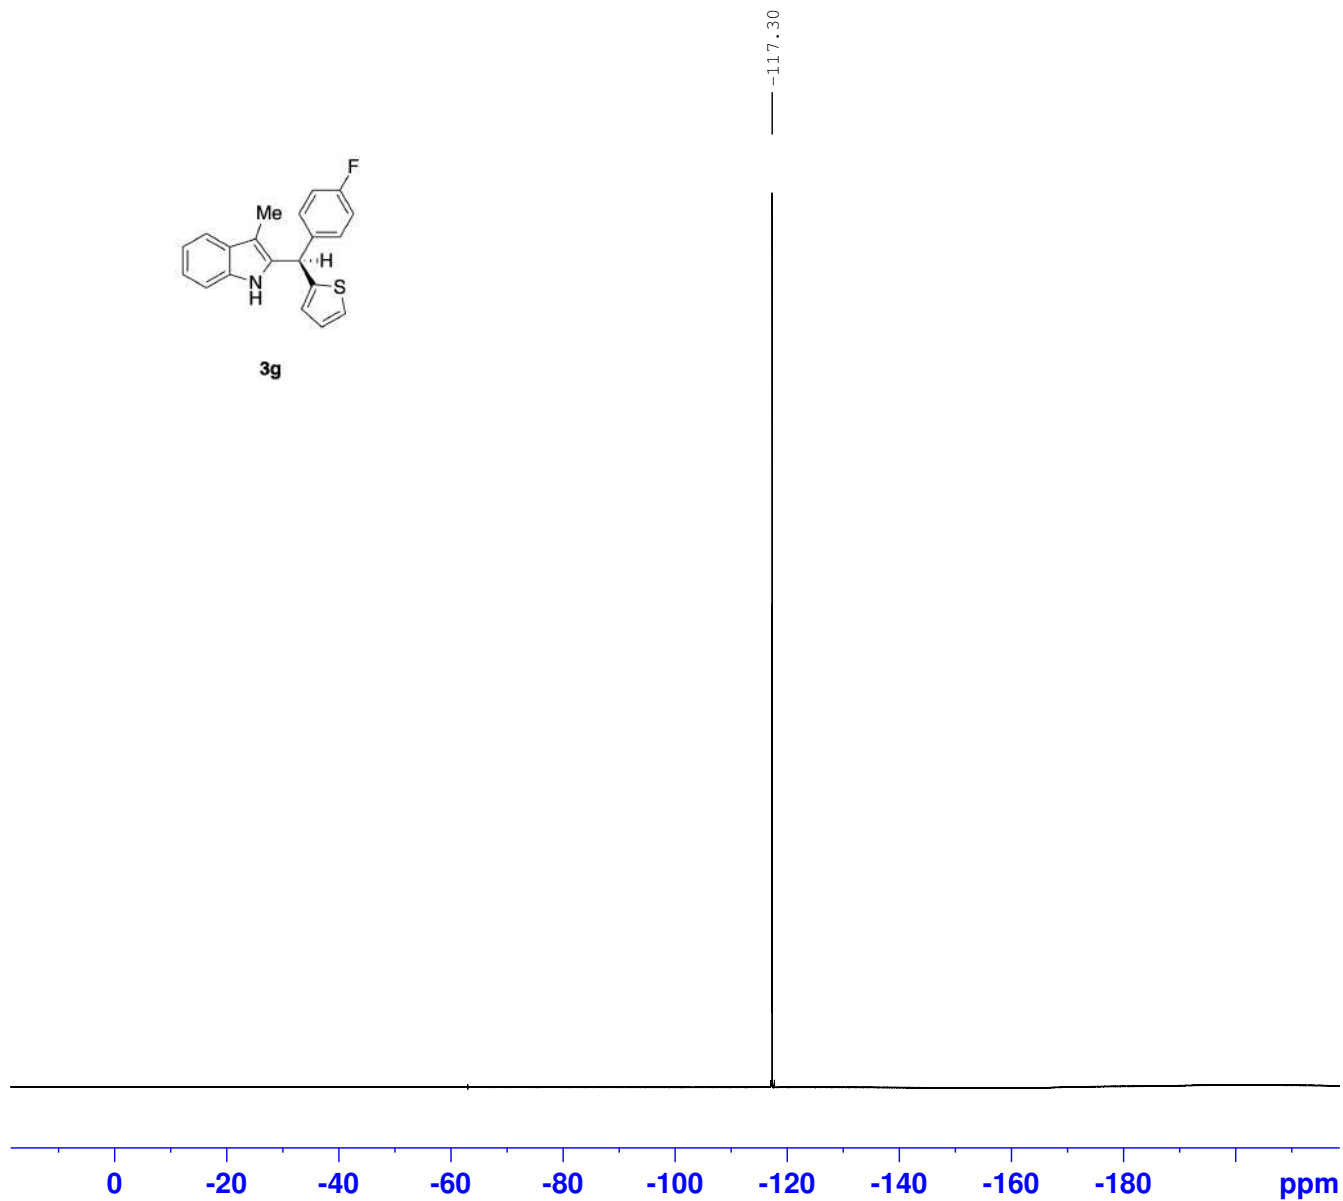

Current Data Parameters  
 NAME YQL-2-1-p  
 EXPNO 2  
 PROCNO 1

F2 - Acquisition Parameters  
 Date\_ 20210725  
 Time 21.48  
 INSTRUM spect  
 PROBHD 5 mm PABBO BB/  
 PULPROG zgflqn  
 TD 131072  
 SOLVENT Acetone  
 NS 16  
 DS 4  
 SWH 89285.711 Hz  
 FIDRES 0.681196 Hz  
 AQ 0.7340032 sec  
 RG 196.92  
 DW 5.600 usec  
 DE 6.50 usec  
 TE 296.4 K  
 D1 1.0000000 sec  
 TD0 1

==== CHANNEL f1 =====  
 SFO1 376.4607164 MHz  
 NUC1 19F  
 P1 14.70 usec  
 PLW1 15.99600029 W

F2 - Processing parameters  
 SI 65536  
 SF 376.4983660 MHz  
 WDW EM  
 SSB 0  
 LB 0.30 Hz  
 GB 0  
 PC 1.00

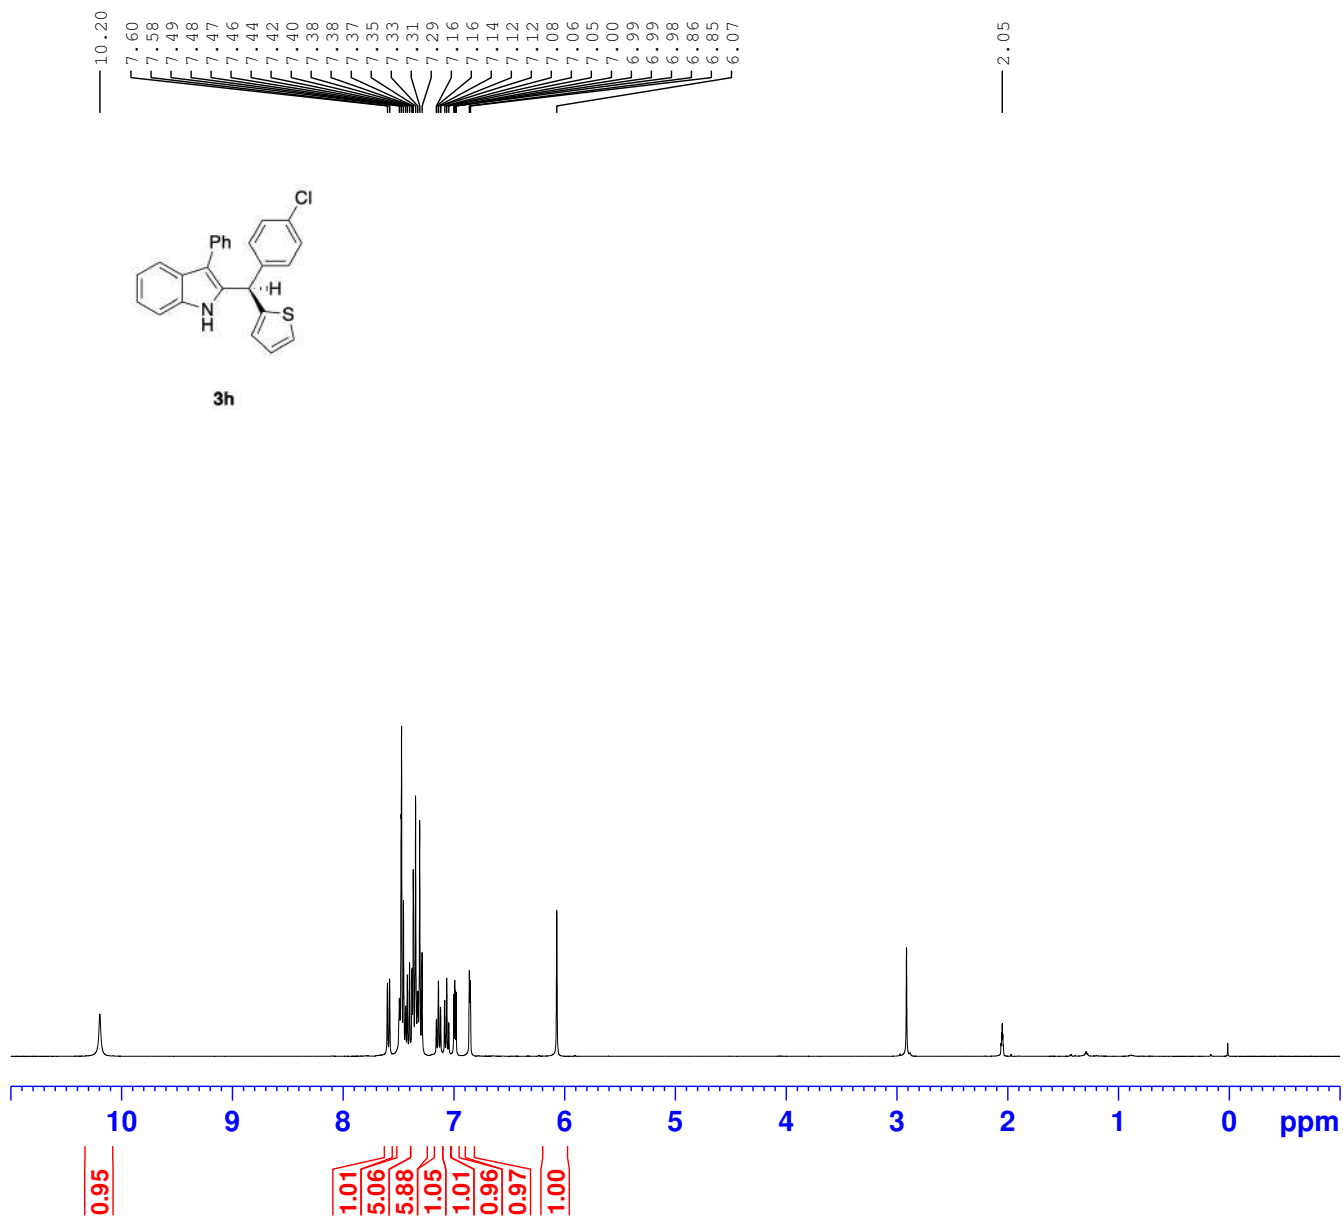

Current Data Parameters  
 NAME YQL-2-5  
 EXPNO 1  
 PROCNO 1

F2 - Acquisition Parameters  
 Date\_ 20210731  
 Time 18.20  
 INSTRUM spect  
 PROBHD 5 mm PABBO BB/  
 PULPROG zg30  
 TD 65536  
 SOLVENT Acetone  
 NS 8  
 DS 0  
 SWH 8012.820 Hz  
 FIDRES 0.122266 Hz  
 AQ 4.0894465 sec  
 RG 54.81  
 DW 62.400 usec  
 DE 6.50 usec  
 TE 296.6 K  
 D1 1.00000000 sec  
 TD0 1

==== CHANNEL f1 =====  
 SF01 400.1324710 MHz  
 NUC1 1H  
 P1 14.50 usec  
 PLW1 11.99499989 W

F2 - Processing parameters  
 SI 65536  
 SF 400.1300073 MHz  
 WDW EM  
 SSB 0  
 LB 0.30 Hz  
 GB 0  
 PC 1.00

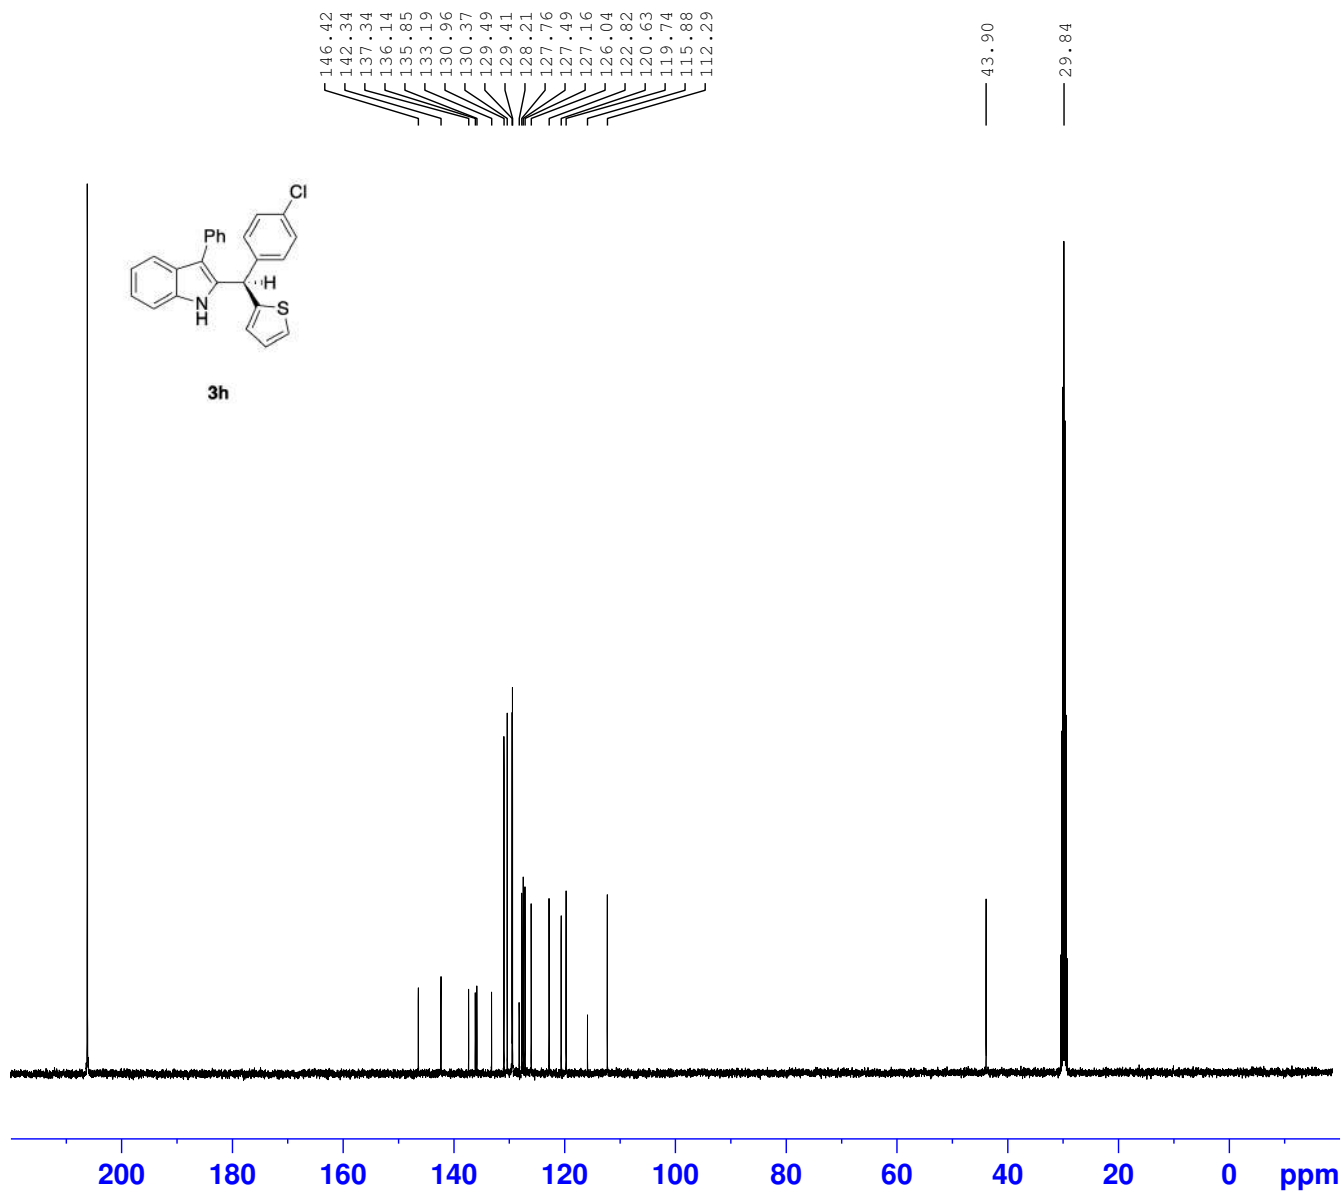

Current Data Parameters  
 NAME YQL-2-5  
 EXPNO 2  
 PROCNO 1

F2 - Acquisition Parameters  
 Date\_ 20210731  
 Time 18.23  
 INSTRUM spect  
 PROBHD 5 mm PABBO BB/  
 PULPROG zgpg30  
 TD 65536  
 SOLVENT Acetone  
 NS 88  
 DS 2  
 SWH 24038.461 Hz  
 FIDRES 0.366798 Hz  
 AQ 1.3631488 sec  
 RG 196.92  
 DW 20.800 usec  
 DE 6.50 usec  
 TE 297.3 K  
 D1 2.00000000 sec  
 D11 0.03000000 sec  
 TD0 1

==== CHANNEL f1 =====  
 SFO1 100.6228298 MHz  
 NUC1 13C  
 P1 9.70 usec  
 PLW1 46.98899841 W

==== CHANNEL f2 =====  
 SFO2 400.1316005 MHz  
 NUC2 1H  
 CPDPRG[2] waltz16  
 PCPD2 90.00 usec  
 PLW2 11.99499989 W  
 PLW12 0.34213999 W  
 PLW13 0.27713001 W

F2 - Processing parameters  
 SI 32768  
 SF 100.6126858 MHz  
 WDW EM  
 SSB 0  
 LB 1.00 Hz  
 GB 0  
 PC 1.40

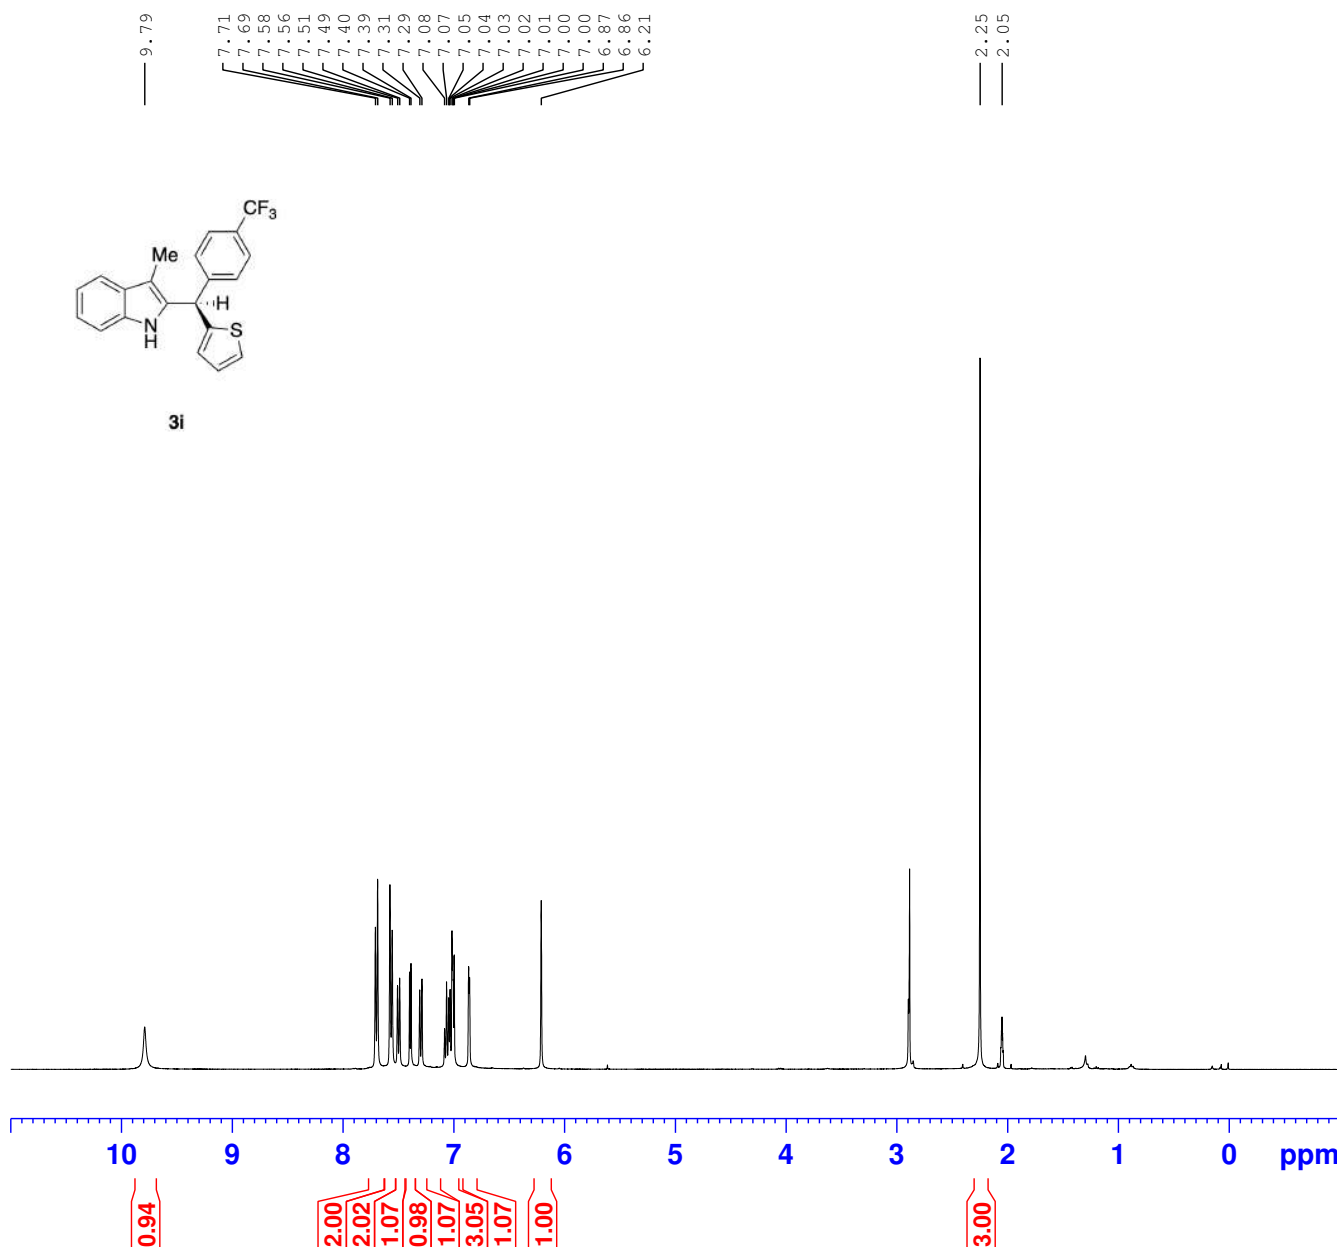

Current Data Parameters  
 NAME YQL-1-179-pdt  
 EXPNO 1  
 PROCNO 1

F2 - Acquisition Parameters  
 Date\_ 20210721  
 Time 22.10  
 INSTRUM spect  
 PROBHD 5 mm PABBO BB/  
 PULPROG zg30  
 TD 65536  
 SOLVENT Acetone  
 NS 8  
 DS 0  
 SWH 8012.820 Hz  
 FIDRES 0.122266 Hz  
 AQ 4.0894465 sec  
 RG 70.97  
 DW 62.400 usec  
 DE 6.50 usec  
 TE 296.8 K  
 D1 1.00000000 sec  
 TD0 1

==== CHANNEL f1 =====  
 SFO1 400.1324710 MHz  
 NUC1 1H  
 P1 14.50 usec  
 PLW1 11.99499989 W

F2 - Processing parameters  
 SI 65536  
 SF 400.1300069 MHz  
 WDW EM  
 SSB 0  
 LB 0.30 Hz  
 GB 0  
 PC 1.00

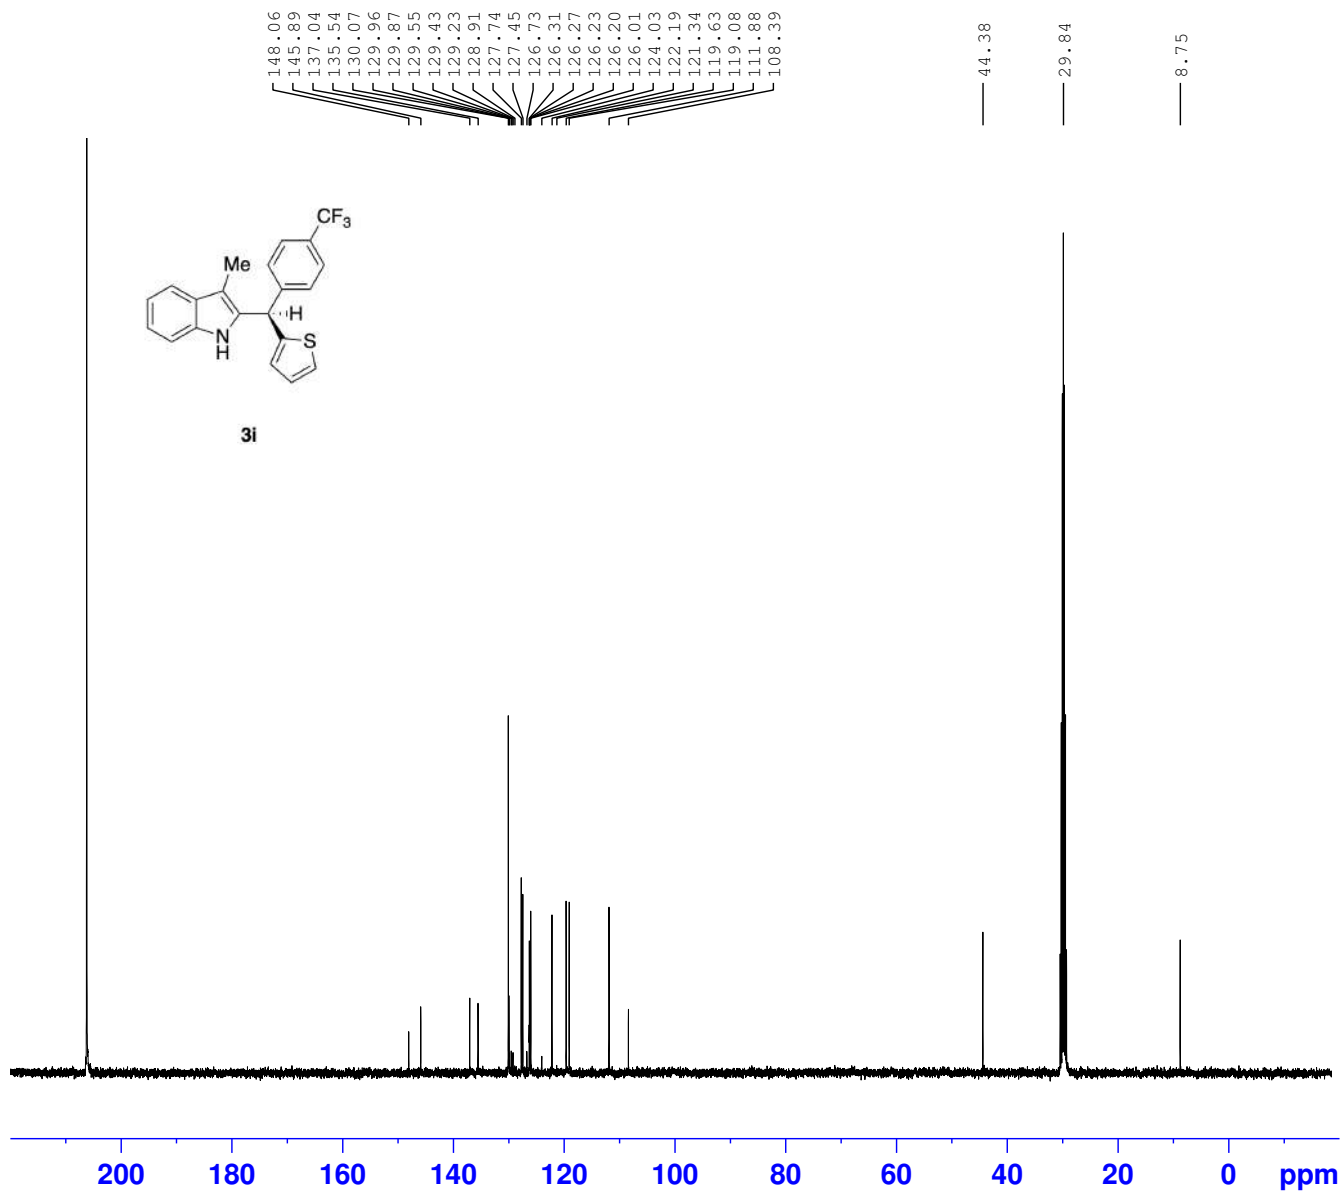

Current Data Parameters  
 NAME YQL-1-179-pdt  
 EXPNO 3  
 PROCNO 1

F2 - Acquisition Parameters  
 Date\_ 20210721  
 Time 22.14  
 INSTRUM spect  
 PROBHD 5 mm PABBO BB/  
 PULPROG zgpg30  
 TD 65536  
 SOLVENT Acetone  
 NS 187  
 DS 2  
 SWH 24038.461 Hz  
 FIDRES 0.366798 Hz  
 AQ 1.3631488 sec  
 RG 196.92  
 DW 20.800 usec  
 DE 6.50 usec  
 TE 297.0 K  
 D1 2.00000000 sec  
 D11 0.03000000 sec  
 TD0 1

==== CHANNEL f1 =====  
 SFO1 100.6228298 MHz  
 NUC1 13C  
 P1 9.70 usec  
 PLW1 46.98899841 W

==== CHANNEL f2 =====  
 SFO2 400.1316005 MHz  
 NUC2 1H  
 CPDPRG[2] waltz16  
 PCPD2 90.00 usec  
 PLW2 11.99499989 W  
 PLW12 0.34213999 W  
 PLW13 0.27713001 W

F2 - Processing parameters  
 SI 32768  
 SF 100.6126806 MHz  
 WDW EM  
 SSB 0  
 LB 1.00 Hz  
 GB 0  
 PC 1.40

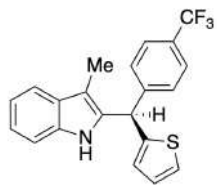

3i

-62.81

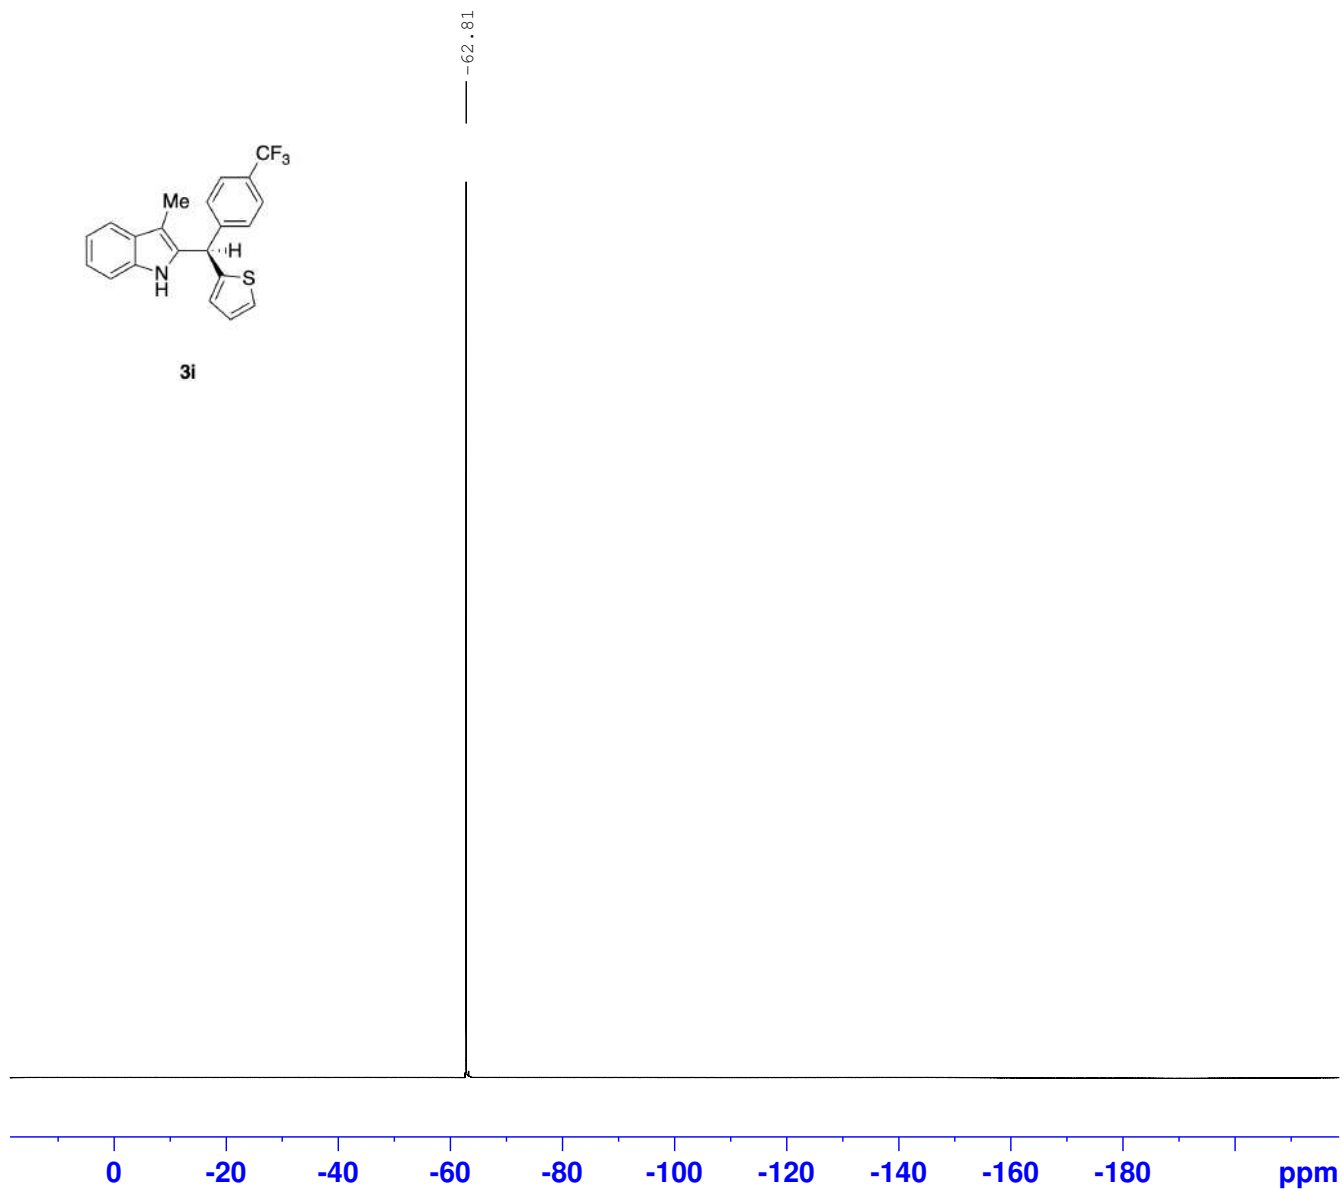

Current Data Parameters  
 NAME YQL-1-179-pdt  
 EXPNO 2  
 PROCNO 1

F2 - Acquisition Parameters  
 Date\_ 20210721  
 Time 22.12  
 INSTRUM spect  
 PROBHD 5 mm PABBO BB/  
 PULPROG zgflqn  
 TD 131072  
 SOLVENT Acetone  
 NS 16  
 DS 4  
 SWH 89285.711 Hz  
 FIDRES 0.681196 Hz  
 AQ 0.7340032 sec  
 RG 196.92  
 DW 5.600 usec  
 DE 6.50 usec  
 TE 296.8 K  
 D1 1.00000000 sec  
 TD0 1

==== CHANNEL f1 =====  
 SF01 376.4607164 MHz  
 NUC1 19F  
 P1 14.70 usec  
 PLW1 15.99600029 W

F2 - Processing parameters  
 SI 65536  
 SF 376.4983660 MHz  
 WDW EM  
 SSB 0  
 LB 0.30 Hz  
 GB 0  
 PC 1.00

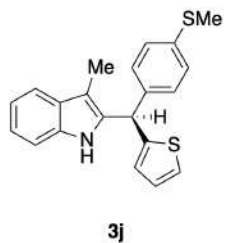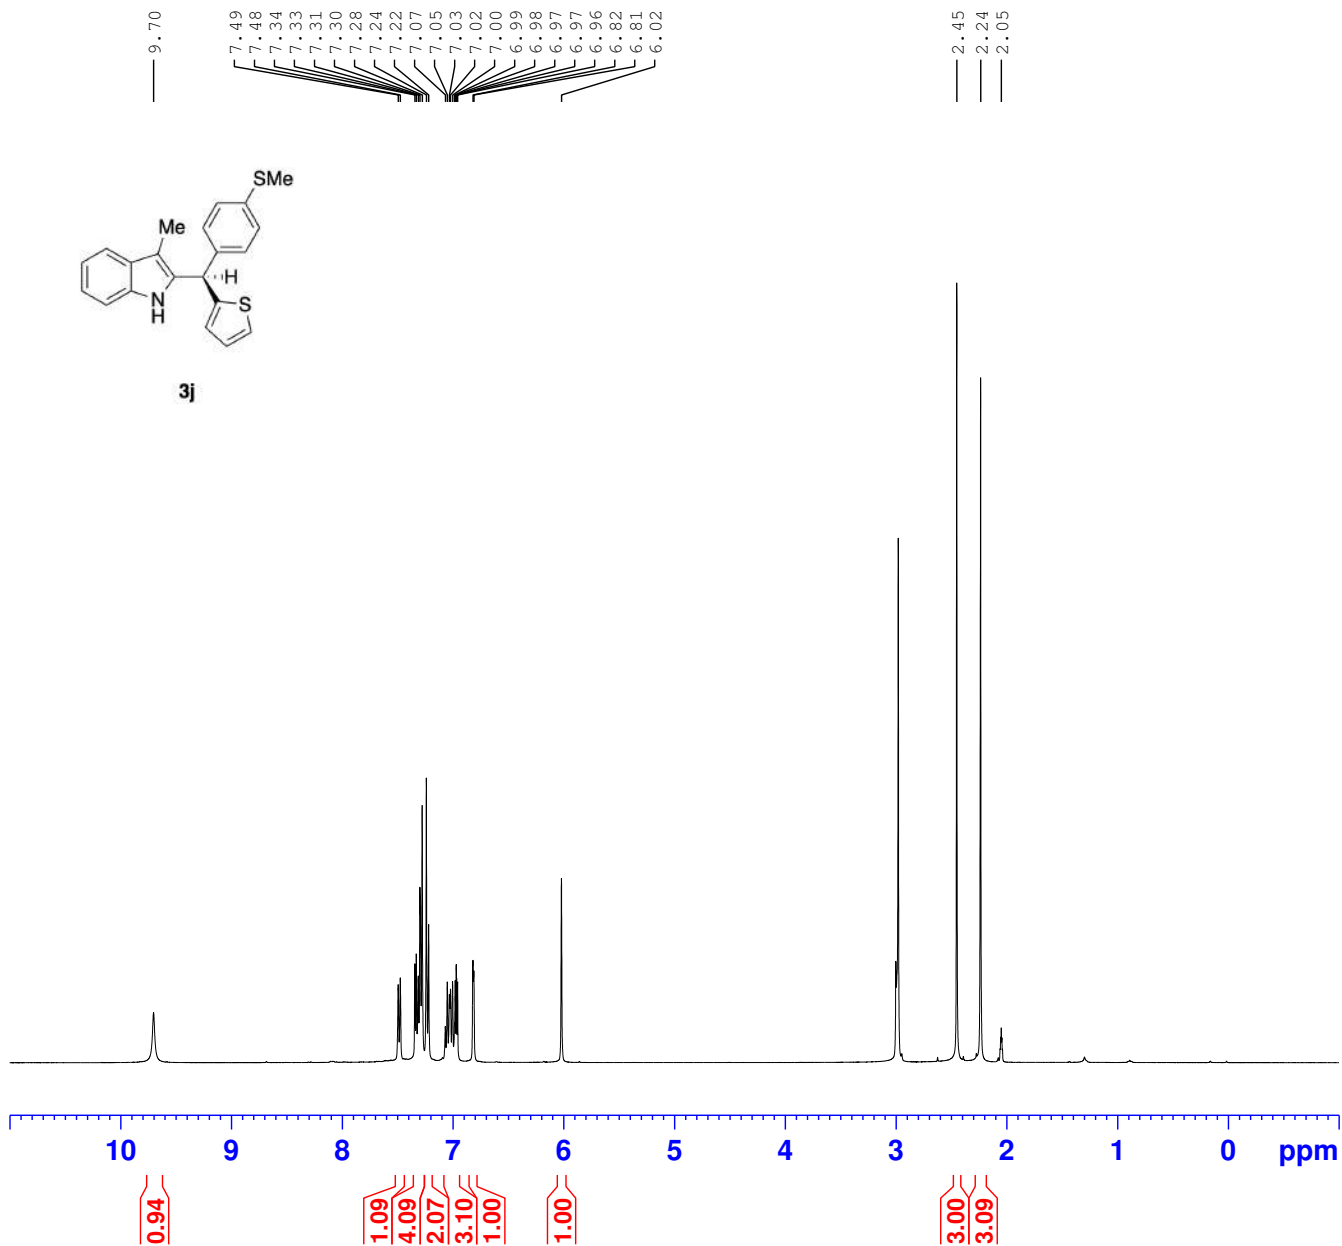

Current Data Parameters  
 NAME YQL-1-168  
 EXPNO 1  
 PROCNO 1

F2 - Acquisition Parameters  
 Date\_ 20210731  
 Time 18.10  
 INSTRUM spect  
 PROBHD 5 mm PABBO BB/  
 PULPROG zg30  
 TD 65536  
 SOLVENT Acetone  
 NS 8  
 DS 0  
 SWH 8012.820 Hz  
 FIDRES 0.122266 Hz  
 AQ 4.0894465 sec  
 RG 31.55  
 DW 62.400 usec  
 DE 6.50 usec  
 TE 296.5 K  
 D1 1.00000000 sec  
 TD0 1

==== CHANNEL f1 =====  
 SFO1 400.1324710 MHz  
 NUC1 1H  
 P1 14.50 usec  
 PLW1 11.99499989 W

F2 - Processing parameters  
 SI 65536  
 SF 400.1300071 MHz  
 WDW EM  
 SSB 0  
 LB 0.30 Hz  
 GB 0  
 PC 1.00

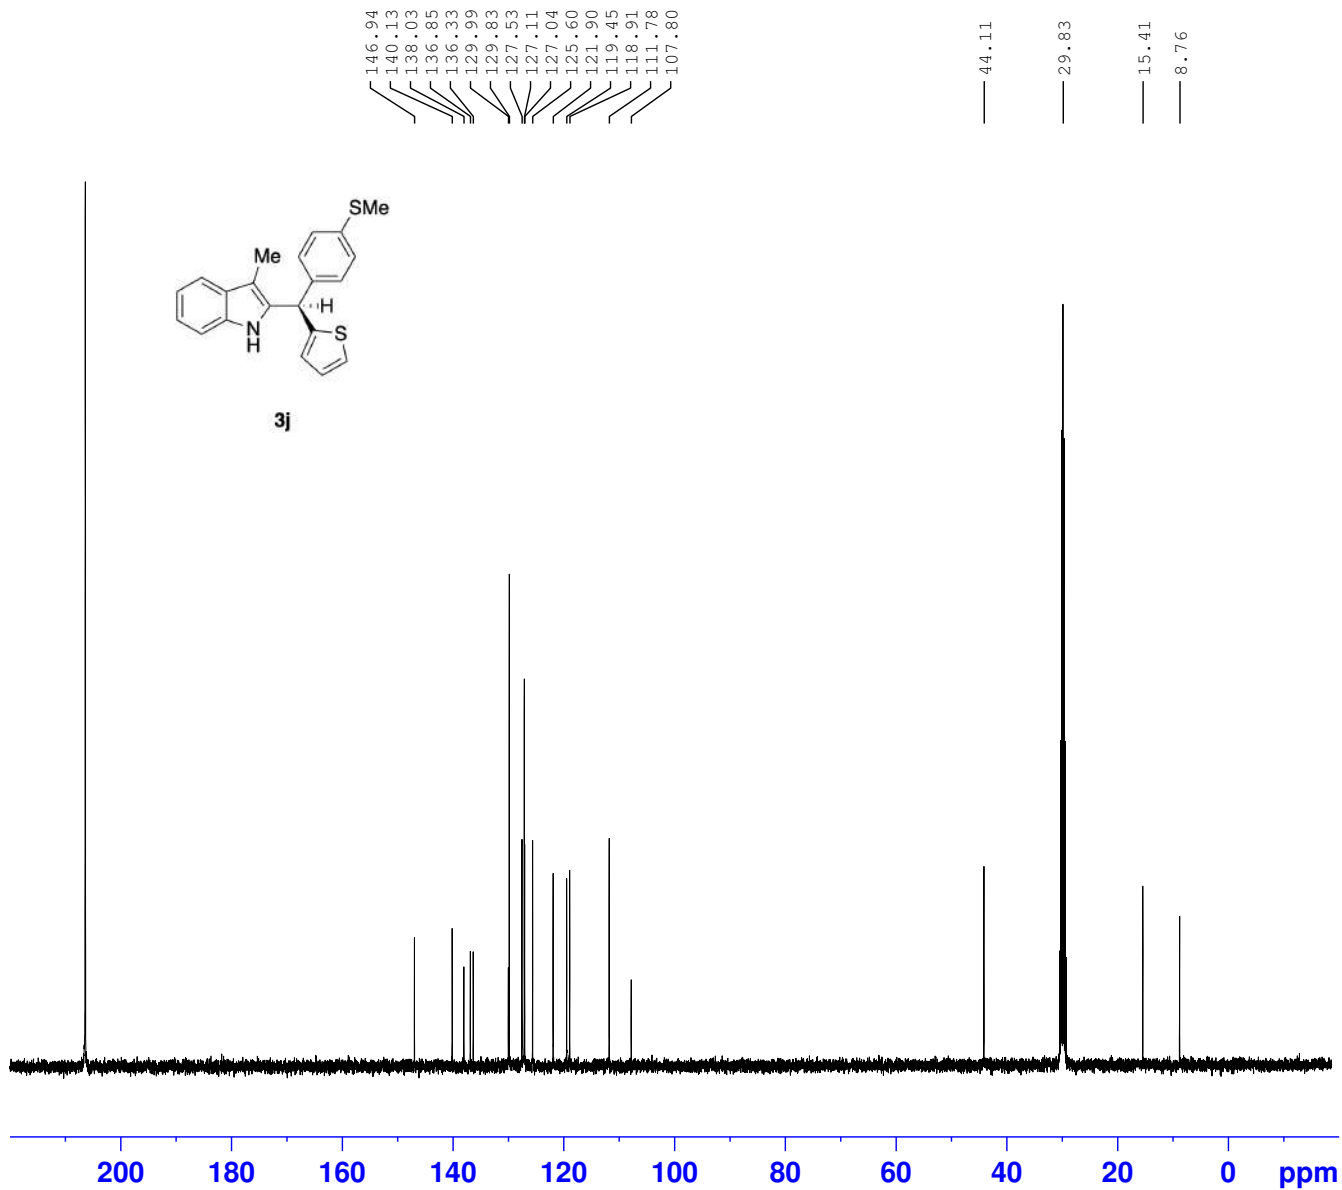

Current Data Parameters  
 NAME YQL-1-168  
 EXPNO 2  
 PROCNO 1

F2 - Acquisition Parameters  
 Date\_ 20210731  
 Time 18.13  
 INSTRUM spect  
 PROBHD 5 mm PABBO BB/  
 PULPROG zgpg30  
 TD 65536  
 SOLVENT Acetone  
 NS 66  
 DS 2  
 SWH 24038.461 Hz  
 FIDRES 0.366798 Hz  
 AQ 1.3631488 sec  
 RG 196.92  
 DW 20.800 usec  
 DE 6.50 usec  
 TE 297.1 K  
 D1 2.00000000 sec  
 D11 0.03000000 sec  
 TD0 1

==== CHANNEL f1 =====  
 SFO1 100.6228298 MHz  
 NUC1 13C  
 P1 9.70 usec  
 PLW1 46.98899841 W

==== CHANNEL f2 =====  
 SFO2 400.1316005 MHz  
 NUC2 1H  
 CPDPRG[2] waltz16  
 PCPD2 90.00 usec  
 PLW2 11.99499989 W  
 PLW12 0.34213999 W  
 PLW13 0.27713001 W

F2 - Processing parameters  
 SI 32768  
 SF 100.6126878 MHz  
 WDW EM  
 SSB 0  
 LB 1.00 Hz  
 GB 0  
 PC 1.40



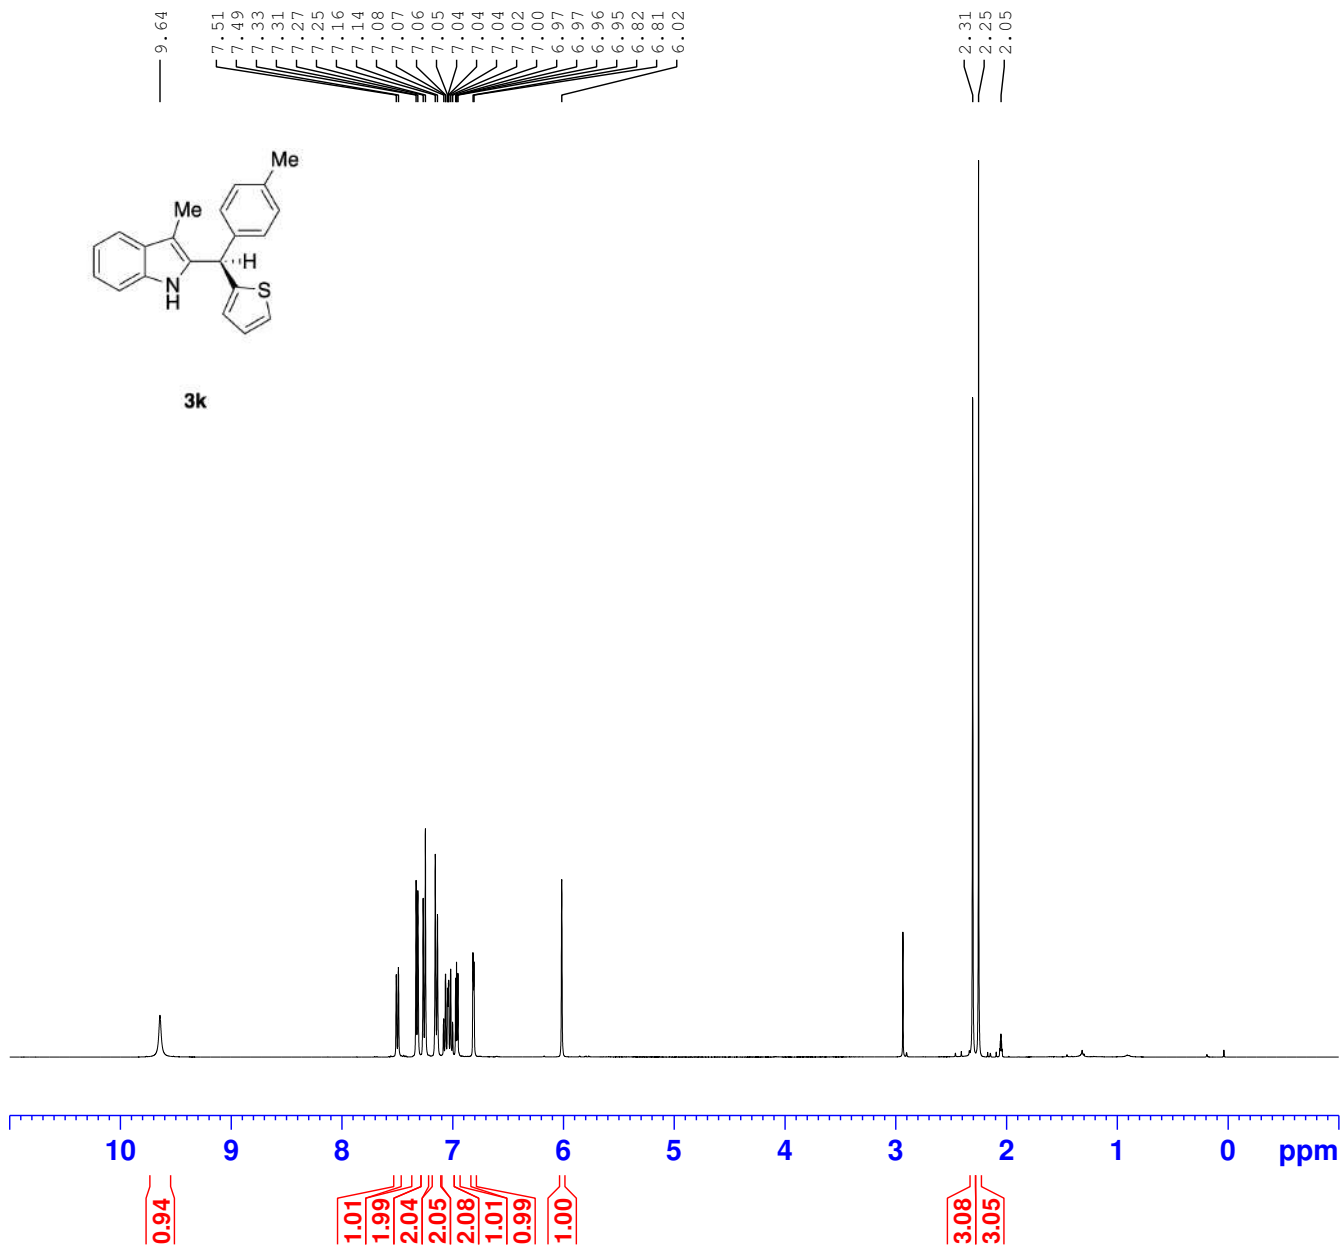

Current Data Parameters  
 NAME YQL-2-19-PDT  
 EXPNO 1  
 PROCNO 1

F2 - Acquisition Parameters  
 Date\_ 20210801  
 Time 22.15  
 INSTRUM spect  
 PROBHD 5 mm PABBO BB/  
 PULPROG zg30  
 TD 65536  
 SOLVENT Acetone  
 NS 8  
 DS 0  
 SWH 8012.820 Hz  
 FIDRES 0.122266 Hz  
 AQ 4.0894465 sec  
 RG 27.78  
 DW 62.400 usec  
 DE 6.50 usec  
 TE 296.7 K  
 D1 1.0000000 sec  
 TD0 1

===== CHANNEL f1 =====  
 SFO1 400.1324710 MHz  
 NUC1 1H  
 P1 14.50 usec  
 PLW1 11.99499989 W

F2 - Processing parameters  
 SI 65536  
 SF 400.1300070 MHz  
 WDW EM  
 SSB 0  
 LB 0.30 Hz  
 GB 0  
 PC 1.00

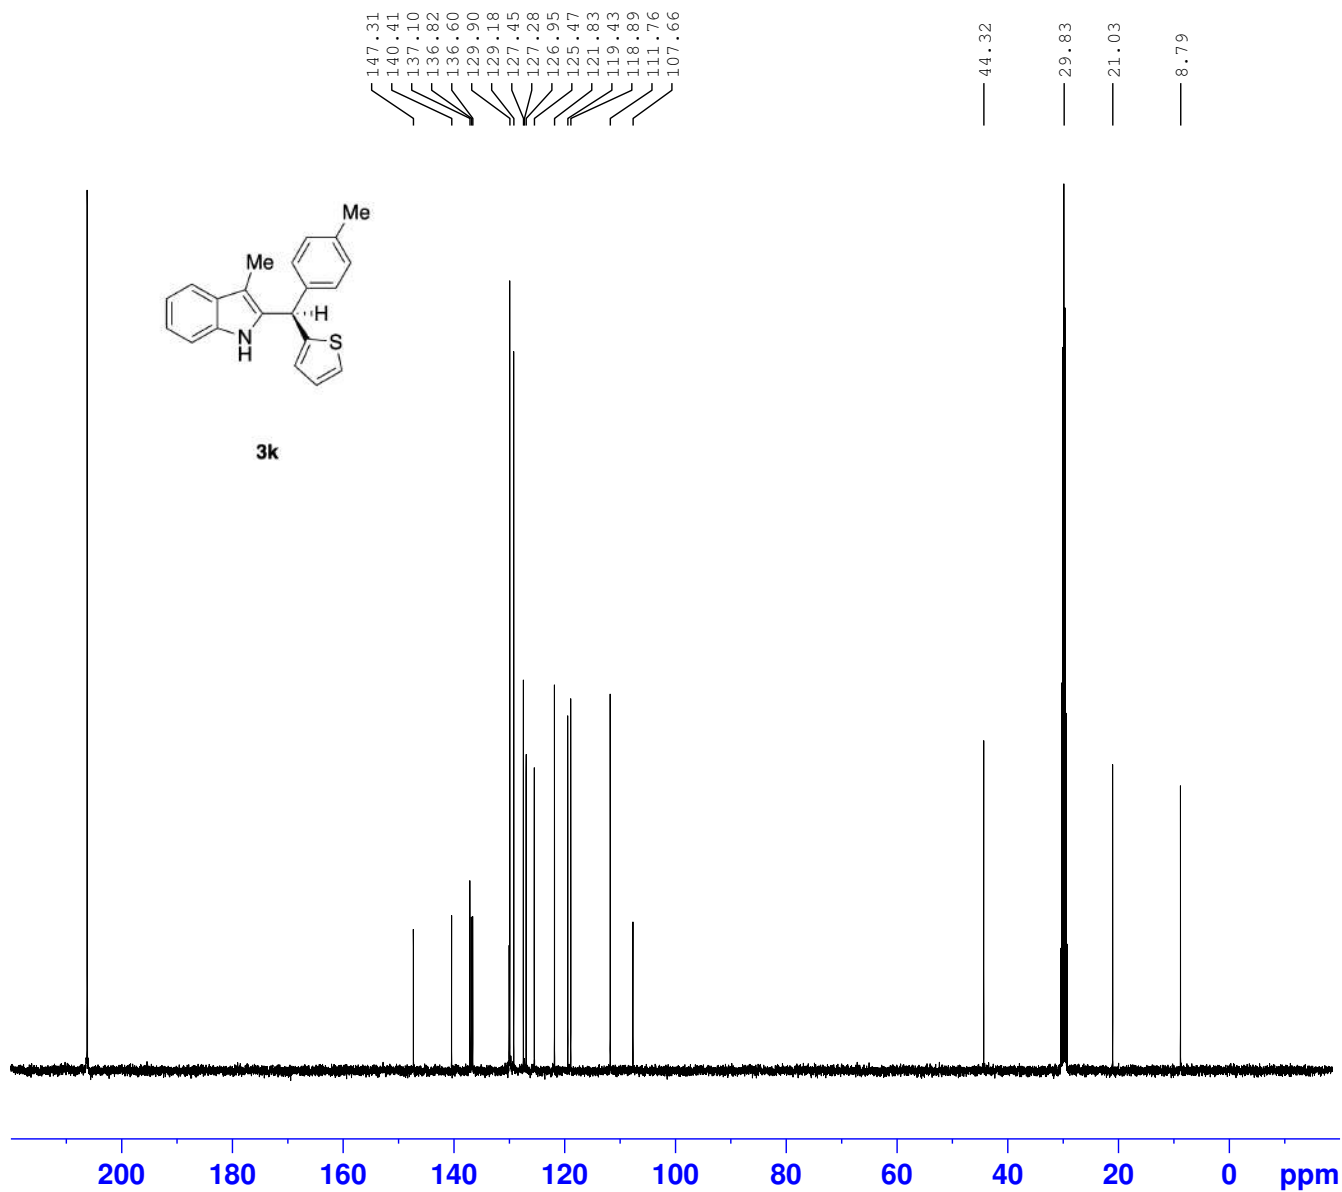

Current Data Parameters  
 NAME YQL-2-19-PDT  
 EXPNO 2  
 PROCNO 1

F2 - Acquisition Parameters  
 Date\_ 20210801  
 Time 22.18  
 INSTRUM spect  
 PROBHD 5 mm PABBO BB/  
 PULPROG zgpg30  
 TD 65536  
 SOLVENT Acetone  
 NS 51  
 DS 2  
 SWH 24038.461 Hz  
 FIDRES 0.366798 Hz  
 AQ 1.3631488 sec  
 RG 196.92  
 DW 20.800 usec  
 DE 6.50 usec  
 TE 297.3 K  
 D1 2.00000000 sec  
 D11 0.03000000 sec  
 TD0 1

===== CHANNEL f1 =====  
 SFO1 100.6228298 MHz  
 NUC1 13C  
 P1 9.70 usec  
 PLW1 46.98899841 W

===== CHANNEL f2 =====  
 SFO2 400.1316005 MHz  
 NUC2 1H  
 CPDPRG[2] waltz16  
 PCPD2 90.00 usec  
 PLW2 11.99499989 W  
 PLW12 0.34213999 W  
 PLW13 0.27713001 W

F2 - Processing parameters  
 SI 32768  
 SF 100.6126895 MHz  
 WDW EM  
 SSB 0  
 LB 1.00 Hz  
 GB 0  
 PC 1.40

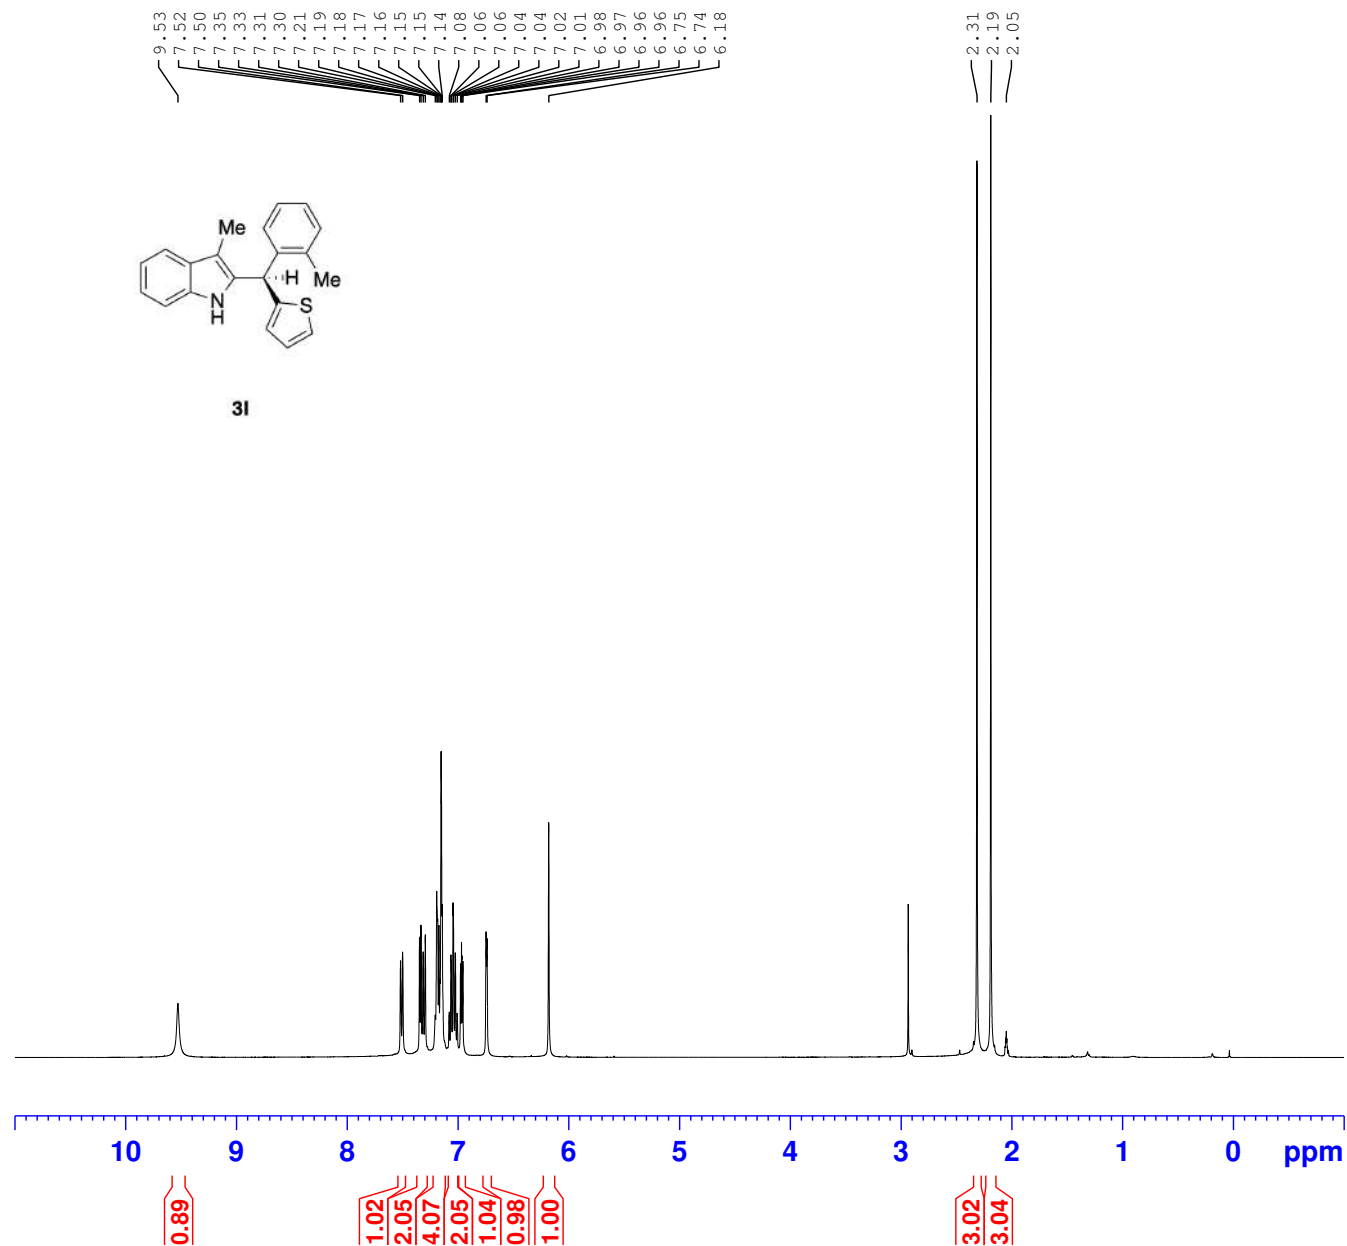

Current Data Parameters  
 NAME YQL-2-18-P  
 EXPNO 1  
 PROCNO 1

F2 - Acquisition Parameters  
 Date\_ 20210805  
 Time 22.42  
 INSTRUM spect  
 PROBHD 5 mm PABBO BB/  
 PULPROG zg30  
 TD 65536  
 SOLVENT Acetone  
 NS 8  
 DS 0  
 SWH 8012.820 Hz  
 FIDRES 0.122266 Hz  
 AQ 4.0894465 sec  
 RG 27.78  
 DW 62.400 usec  
 DE 6.50 usec  
 TE 296.5 K  
 D1 1.00000000 sec  
 TD0 1

===== CHANNEL f1 =====  
 SFO1 400.1324710 MHz  
 NUC1 1H  
 P1 14.50 usec  
 PLW1 11.99499989 W

F2 - Processing parameters  
 SI 65536  
 SF 400.1300071 MHz  
 WDW EM  
 SSB 0  
 LB 0.30 Hz  
 GB 0  
 PC 1.00

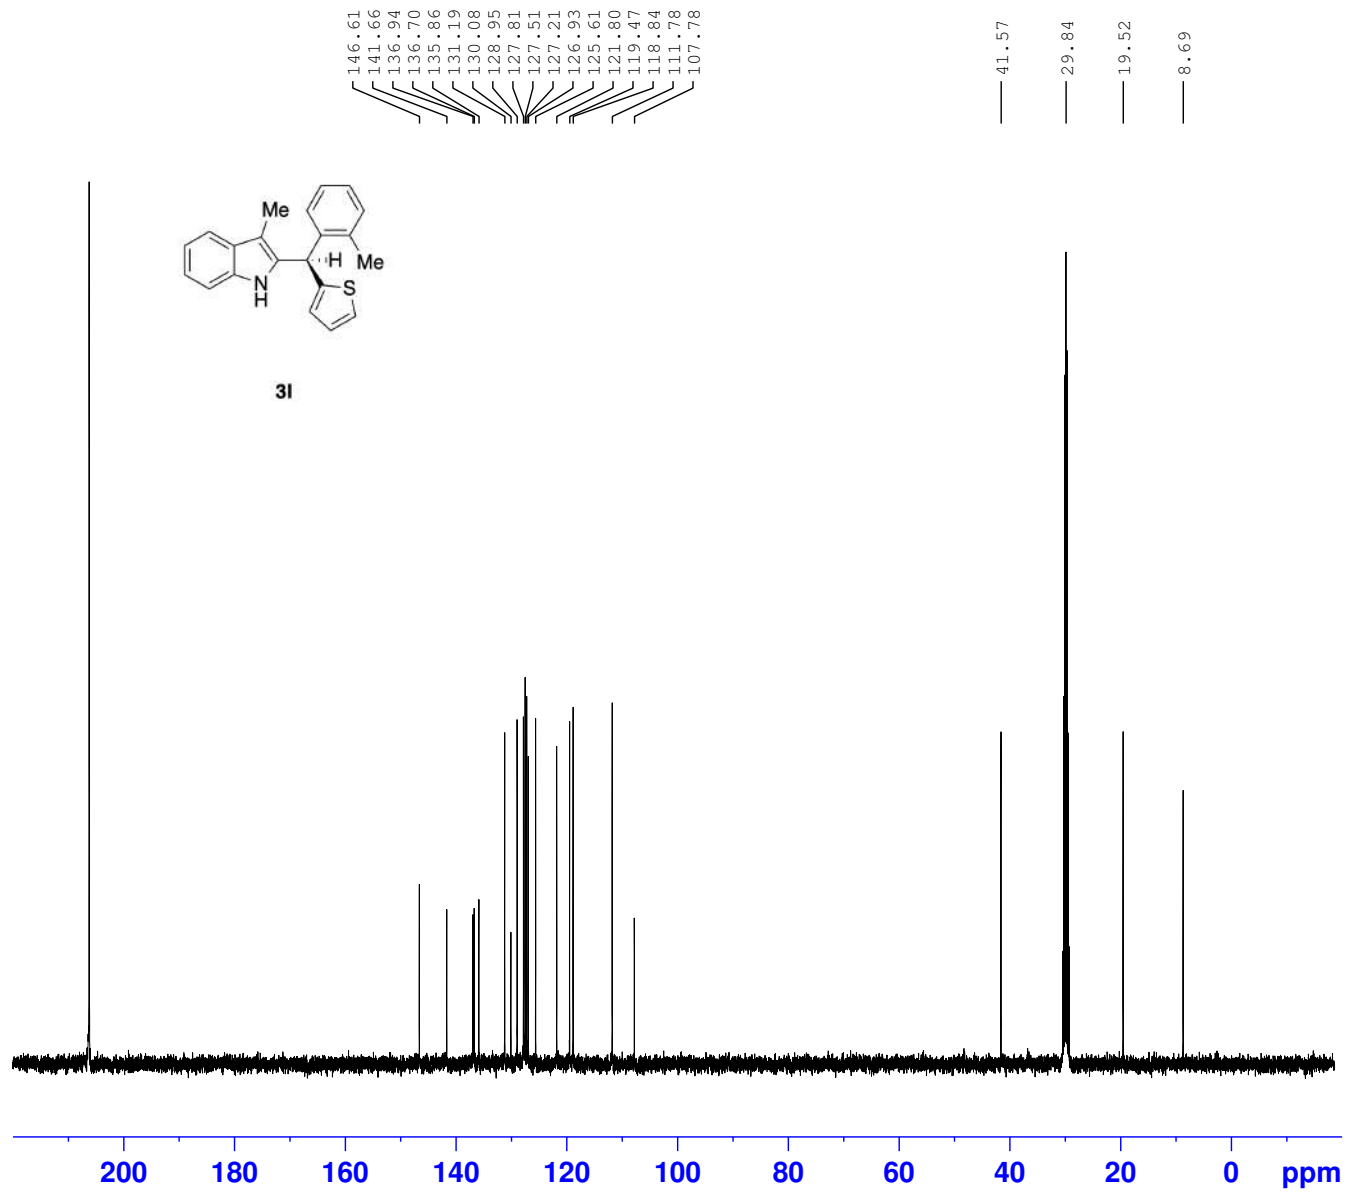

Current Data Parameters  
 NAME YQL-2-18-P  
 EXPNO 2  
 PROCNO 1

F2 - Acquisition Parameters  
 Date\_ 20210805  
 Time 22.45  
 INSTRUM spect  
 PROBHD 5 mm PABBO BB/  
 PULPROG zgpg30  
 TD 65536  
 SOLVENT Acetone  
 NS 47  
 DS 2  
 SWH 24038.461 Hz  
 FIDRES 0.366798 Hz  
 AQ 1.3631488 sec  
 RG 196.92  
 DW 20.800 usec  
 DE 6.50 usec  
 TE 297.3 K  
 D1 2.0000000 sec  
 D11 0.0300000 sec  
 TD0 1

==== CHANNEL f1 =====  
 SFO1 100.6228298 MHz  
 NUC1 13C  
 P1 9.70 usec  
 PLW1 46.98899841 W

==== CHANNEL f2 =====  
 SFO2 400.1316005 MHz  
 NUC2 1H  
 CPDPRG[2] waltz16  
 PCPD2 90.00 usec  
 PLW2 11.99499989 W  
 PLW12 0.34213999 W  
 PLW13 0.27713001 W

F2 - Processing parameters  
 SI 32768  
 SF 100.6126899 MHz  
 WDW EM  
 SSB 0  
 LB 1.00 Hz  
 GB 0  
 PC 1.40

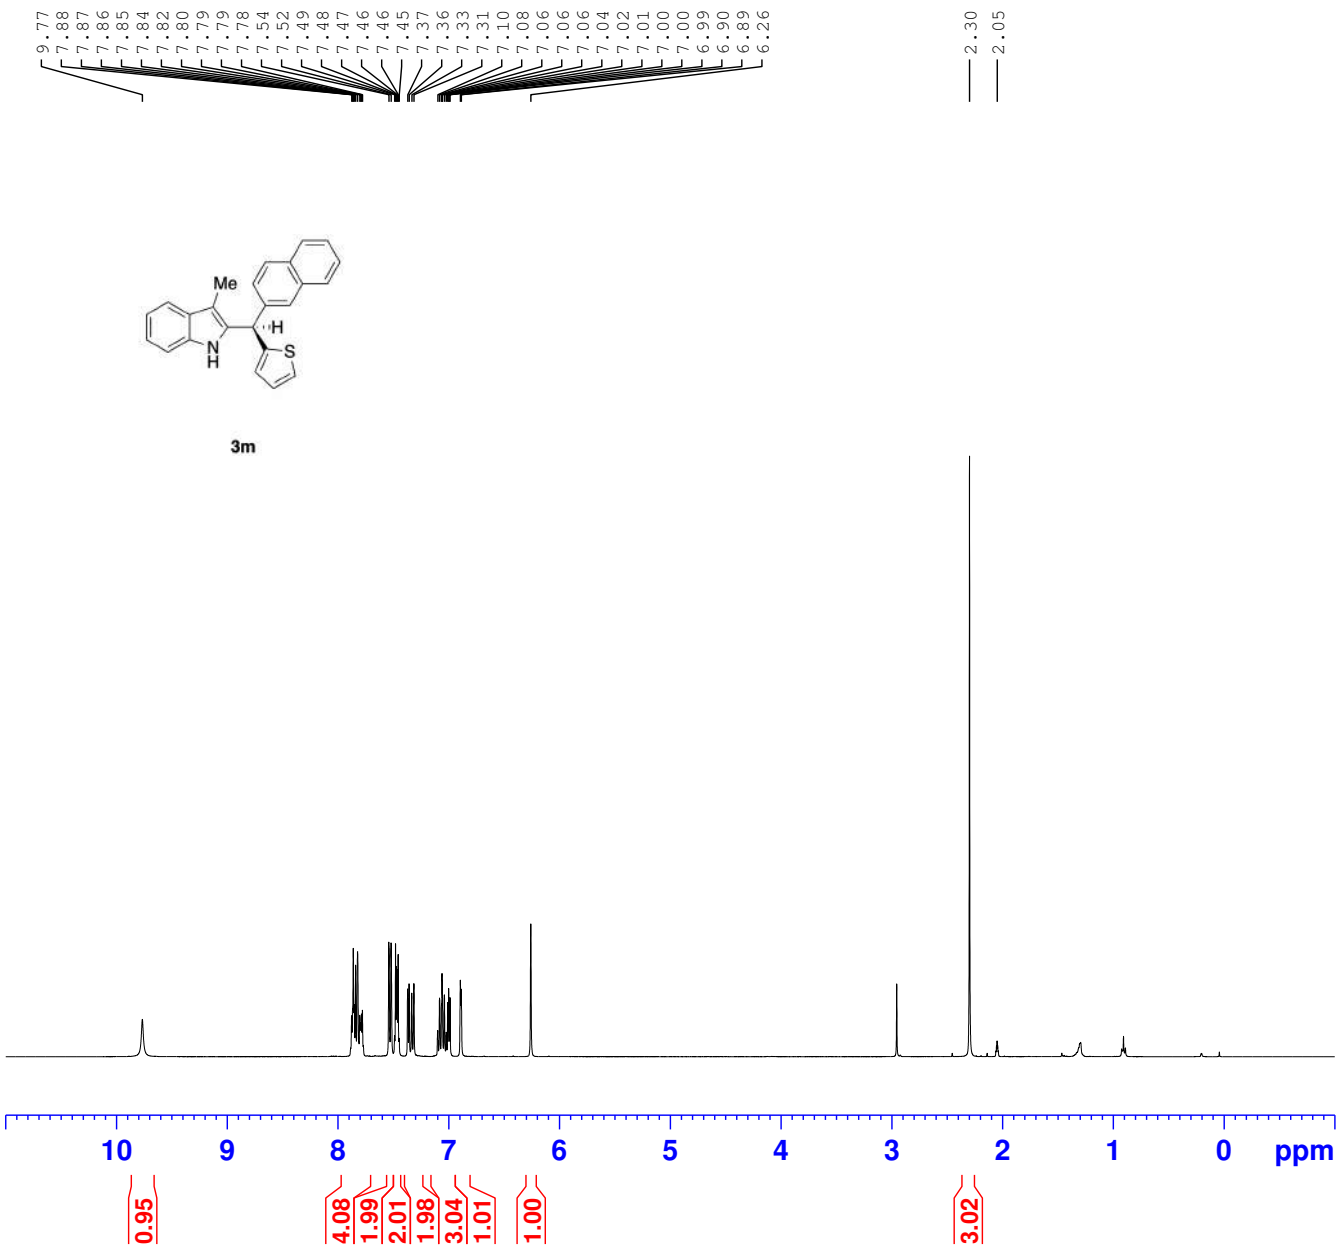

```

Current Data Parameters
NAME      YQL-1-151-product
EXPNO     1
PROCNO    1

F2 - Acquisition Parameters
Date_     20210706
Time      10.15
INSTRUM   spect
PROBHD    5 mm PABBO BB/
PULPROG   zg30
TD         65536
SOLVENT   Acetone
NS         8
DS         0
SWH        8012.820 Hz
FIDRES     0.122266 Hz
AQ         4.0894465 sec
RG         27.78
DW         62.400 usec
DE         6.50 usec
TE         296.7 K
D1         1.00000000 sec
TD0        1

===== CHANNEL f1 =====
SFO1      400.1324710 MHz
NUC1       1H
P1         14.50 usec
PLW1      11.99499989 W

F2 - Processing parameters
SI         65536
SF         400.1300073 MHz
WDW        EM
SSB        0
LB         0.30 Hz
GB         0
PC         1.00

```

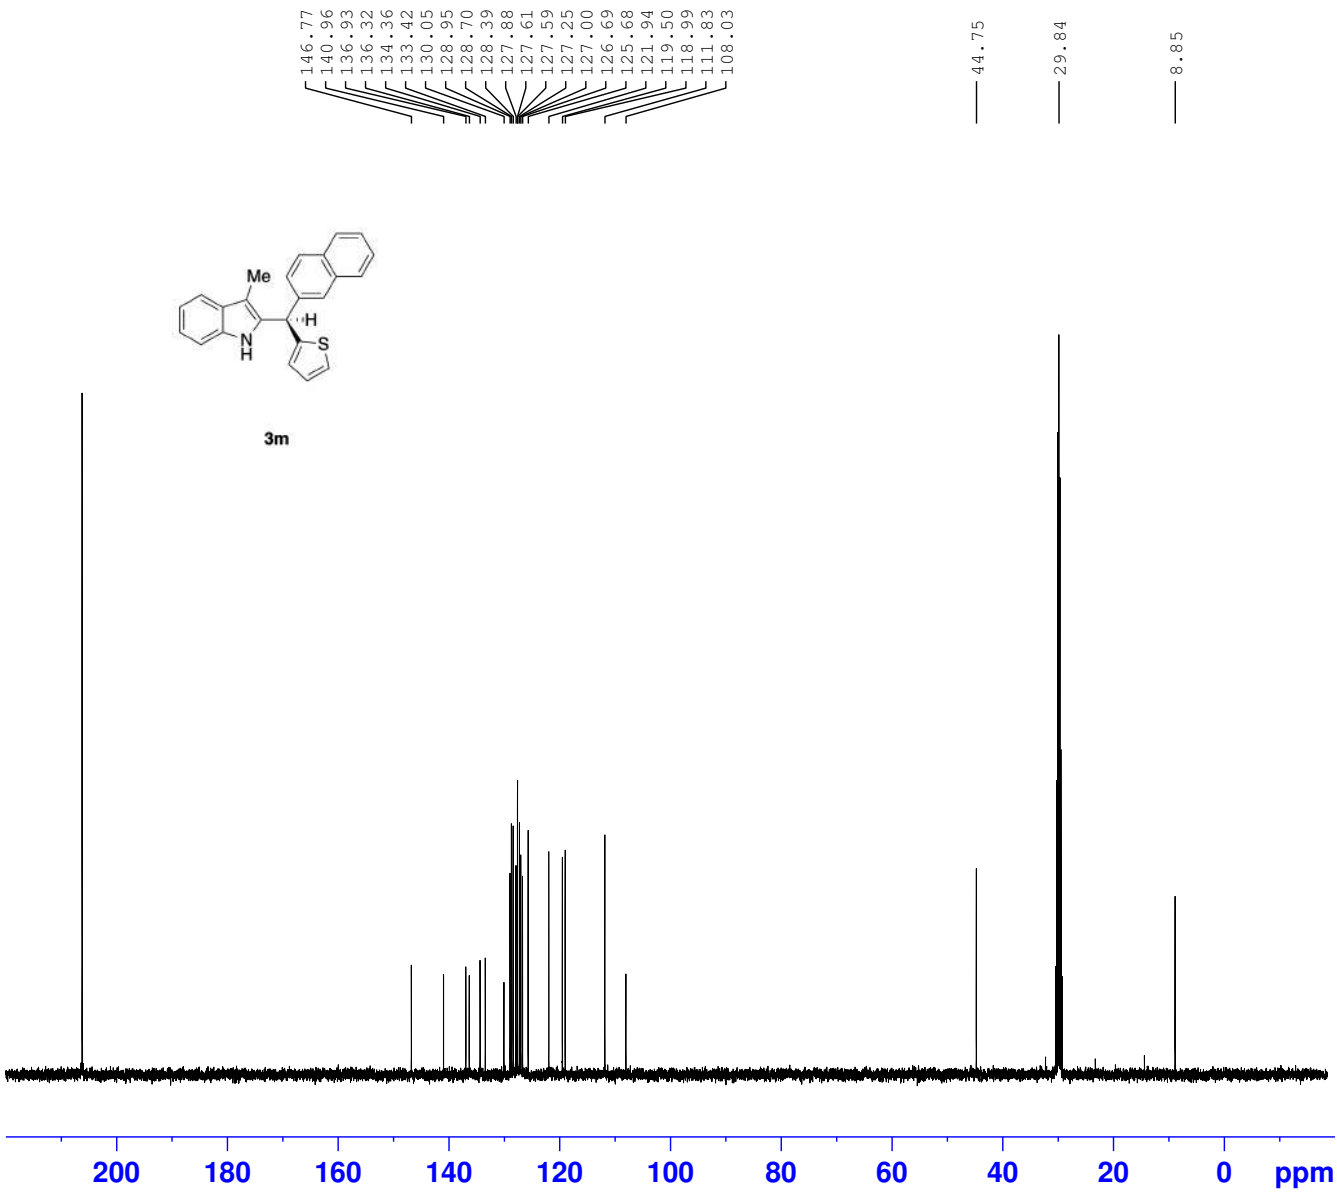

Current Data Parameters  
 NAME YQL-1-151  
 EXPNO 3  
 PROCNO 1

F2 - Acquisition Parameters  
 Date\_ 20210706  
 Time 10.18  
 INSTRUM spect  
 PROBHD 5 mm PABBO BB/  
 PULPROG zgpg30  
 TD 65536  
 SOLVENT Acetone  
 NS 17  
 DS 2  
 SWH 24038.461 Hz  
 FIDRES 0.366798 Hz  
 AQ 1.3631488 sec  
 RG 196.92  
 DW 20.800 usec  
 DE 6.50 usec  
 TE 297.2 K  
 D1 2.00000000 sec  
 D11 0.03000000 sec  
 TD0 1

==== CHANNEL f1 =====  
 SFO1 100.6228298 MHz  
 NUC1 13C  
 P1 9.70 usec  
 PLW1 46.98899841 W

==== CHANNEL f2 =====  
 SFO2 400.1316005 MHz  
 NUC2 1H  
 CPDPRG[2] waltz16  
 PCPD2 90.00 usec  
 PLW2 11.99499989 W  
 PLW12 0.34213999 W  
 PLW13 0.27713001 W

F2 - Processing parameters  
 SI 32768  
 SF 100.6126903 MHz  
 WDW EM  
 SSB 0  
 LB 1.00 Hz  
 GB 0  
 PC 1.40

9.66  
 7.51  
 7.50  
 7.38  
 7.37  
 7.34  
 7.32  
 7.32  
 7.31  
 7.27  
 7.25  
 7.23  
 7.09  
 7.07  
 7.05  
 7.04  
 7.04  
 7.02  
 7.01  
 6.63  
 6.62  
 6.58  
 6.57  
 5.97

2.40  
 2.25  
 2.05

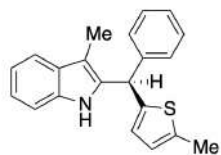

3n

```

Current Data Parameters
NAME          YQL-1-173
EXPNO         1
PROCNO        1

F2 - Acquisition Parameters
Date_         20210717
Time          21.22
INSTRUM       spect
PROBHD        5 mm PABBO BB/
PULPROG       zg30
TD            65536
SOLVENT       Acetone
NS            8
DS            0
SWH           8012.820 Hz
FIDRES        0.122266 Hz
AQ            4.0894465 sec
RG            25.32
DW            62.400 usec
DE            6.50 usec
TE            296.5 K
D1            1.00000000 sec
TD0           1

===== CHANNEL f1 =====
SFO1          400.1324710 MHz
NUC1          1H
P1            14.50 usec
PLW1          11.99499989 W

F2 - Processing parameters
SI            65536
SF            400.1300067 MHz
WDW           EM
SSB           0
LB            0.30 Hz
GB            0
PC            1.00
  
```

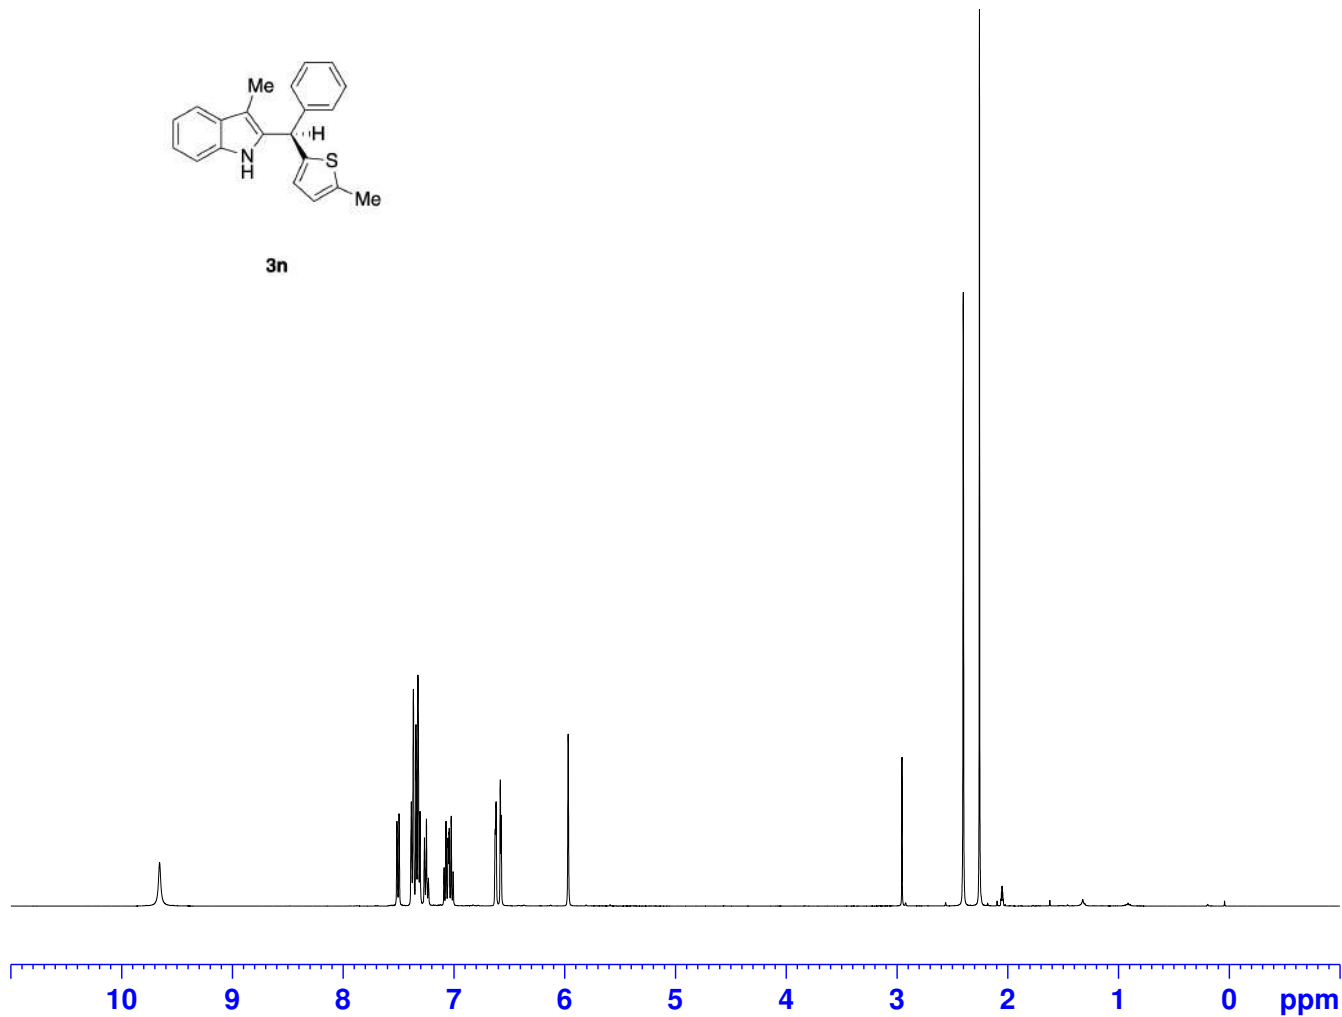

0.95  
 1.03  
 5.01  
 1.05  
 2.06  
 1.98  
 1.00  
 3.07  
 3.08

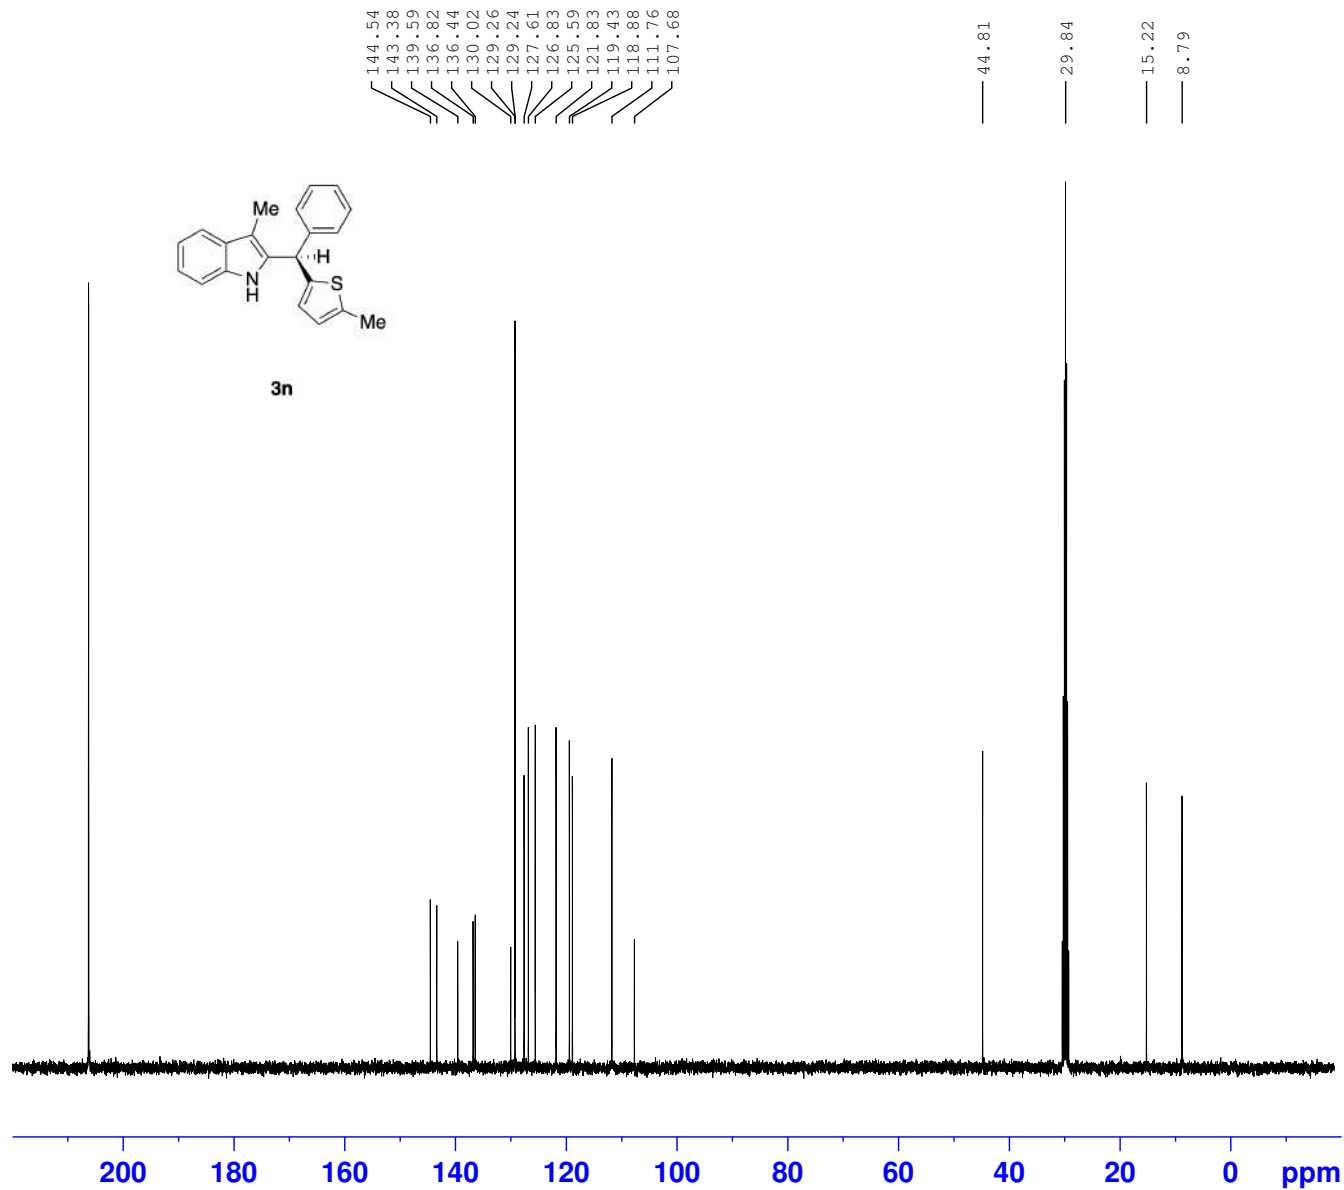

Current Data Parameters  
 NAME YQL-1-173  
 EXPNO 2  
 PROCNO 1

F2 - Acquisition Parameters  
 Date\_ 20210717  
 Time 21.25  
 INSTRUM spect  
 PROBHD 5 mm PABBO BB/  
 PULPROG zgpg30  
 TD 65536  
 SOLVENT Acetone  
 NS 36  
 DS 2  
 SWH 24038.461 Hz  
 FIDRES 0.366798 Hz  
 AQ 1.3631488 sec  
 RG 196.92  
 DW 20.800 usec  
 DE 6.50 usec  
 TE 297.1 K  
 D1 2.0000000 sec  
 D11 0.03000000 sec  
 TD0 1

==== CHANNEL f1 =====  
 SFO1 100.6228298 MHz  
 NUC1 13C  
 P1 9.70 usec  
 PLW1 46.98899841 W

==== CHANNEL f2 =====  
 SFO2 400.1316005 MHz  
 NUC2 1H  
 CPDPRG[2] waltz16  
 PCPD2 90.00 usec  
 PLW2 11.99499989 W  
 PLW12 0.34213999 W  
 PLW13 0.27713001 W

F2 - Processing parameters  
 SI 32768  
 SF 100.6126902 MHz  
 WDW EM  
 SSB 0  
 LB 1.00 Hz  
 GB 0  
 PC 1.40



7.81  
7.74  
7.74  
7.72  
7.72  
7.51  
7.51  
7.49  
7.49  
7.46  
7.45  
7.45  
7.43  
7.39  
7.38  
7.37  
7.37  
7.35  
7.35  
7.35  
7.33  
7.33  
7.33  
7.32  
7.31  
7.31  
7.30  
7.29  
7.29  
7.28  
7.28  
7.07  
7.07  
7.06  
7.05  
7.04  
7.04  
7.03  
7.03  
7.02  
7.01  
7.01  
6.99  
6.99  
6.14

2.27  
2.05

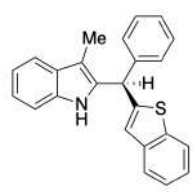

3o

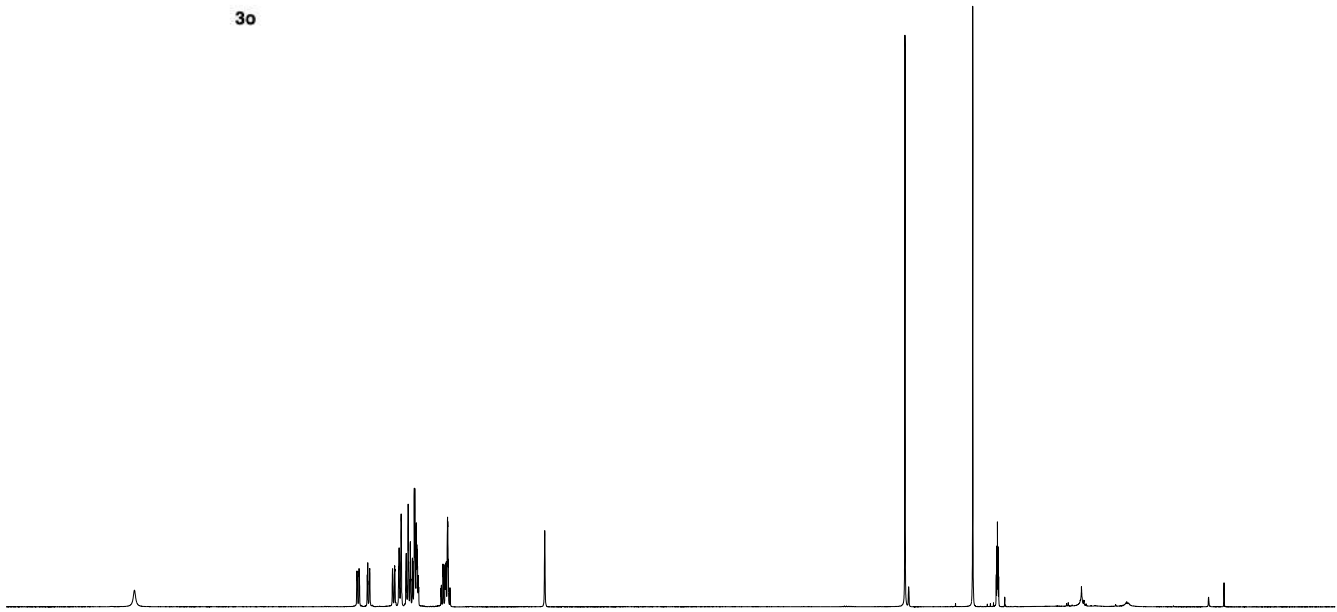

10 9 8 7 6 5 4 3 2 1 0 ppm

1.00  
1.04  
1.05  
1.02  
2.03  
6.10  
3.03  
1.00

3.03

Current Data Parameters  
NAME YQL-2-36-P  
EXPNO 2  
PROCNO 1

F2 - Acquisition Parameters  
Date\_ 20210821  
Time 10.13  
INSTRUM spect  
PROBHD 5 mm DUL 13C-1  
PULPROG zg30  
TD 65536  
SOLVENT Acetone  
NS 8  
DS 0  
SWH 8223.685 Hz  
FIDRES 0.125483 Hz  
AQ 3.9845889 sec  
RG 322  
DW 60.800 usec  
DE 6.00 usec  
TE 300.0 K  
D1 1.00000000 sec  
TD0 1

==== CHANNEL f1 =====  
NUC1 1H  
P1 15.80 usec  
PL1 -1.00 dB  
PL1W 12.17476940 W  
SFO1 400.1324710 MHz

F2 - Processing parameters  
SI 32768  
SF 400.1300069 MHz  
WDW EM  
SSB 0  
LB 0.30 Hz  
GB 0  
PC 1.00

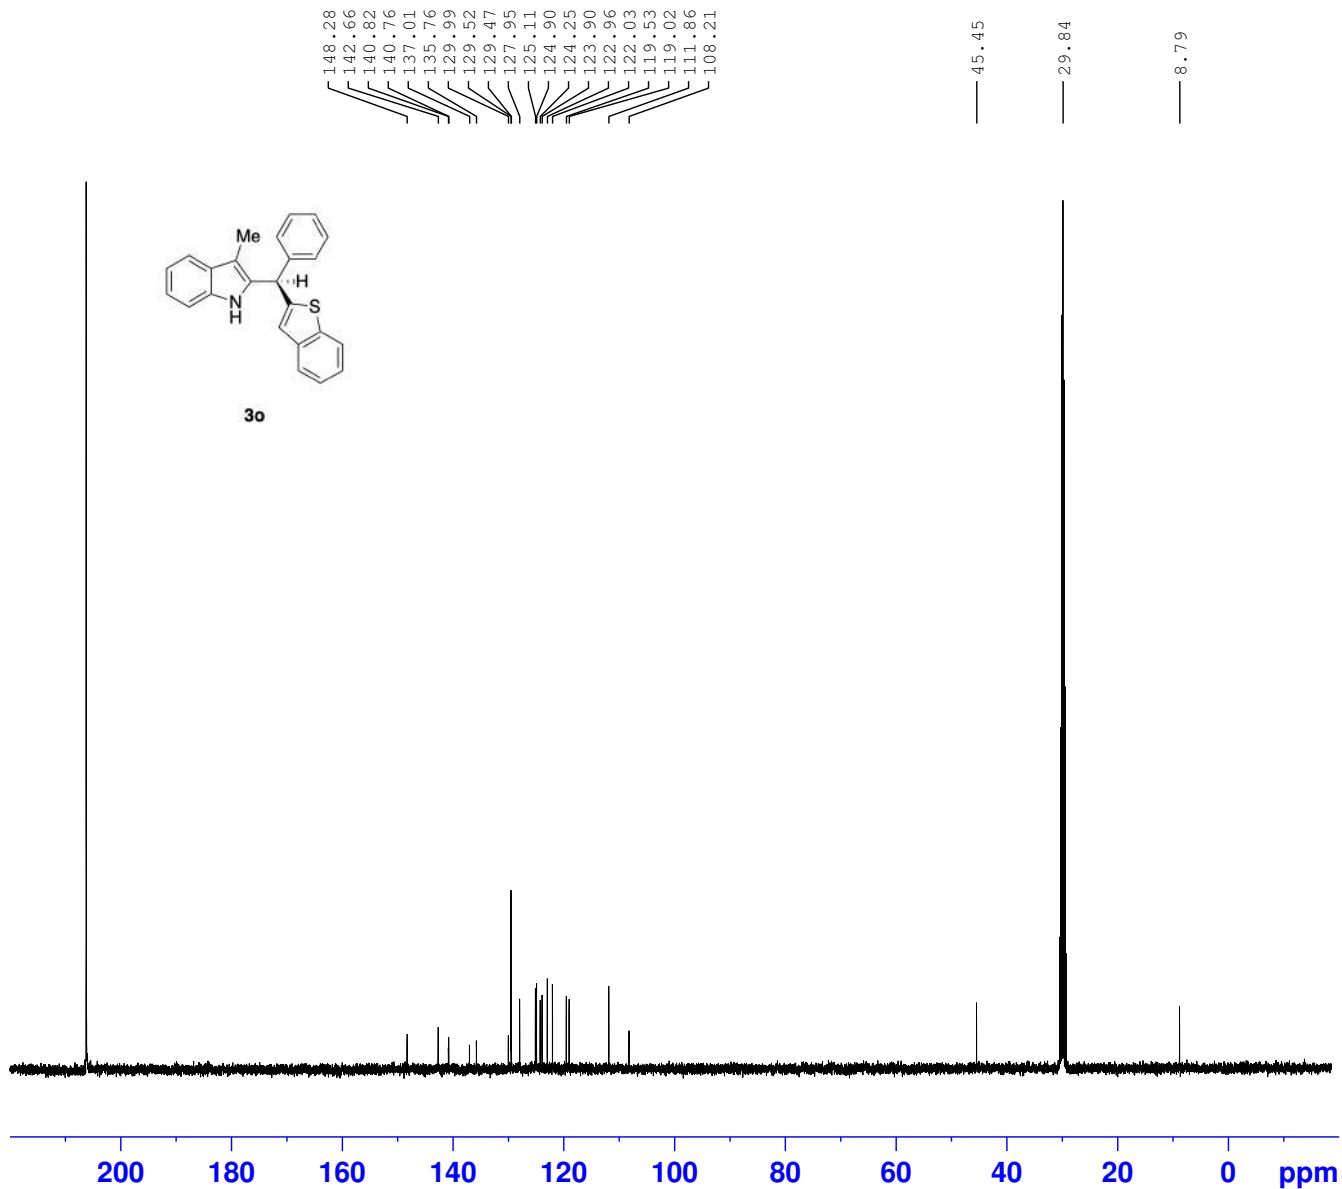

Current Data Parameters  
 NAME YQL-2-36-P  
 EXPNO 3  
 PROCNO 1

F2 - Acquisition Parameters  
 Date\_ 20210821  
 Time 10.16  
 INSTRUM spect  
 PROBHD 5 mm DUL 13C-1  
 PULPROG zgpg30  
 TD 65536  
 SOLVENT Acetone  
 NS 201  
 DS 1  
 SWH 24038.461 Hz  
 FIDRES 0.366798 Hz  
 AQ 1.3631488 sec  
 RG 2050  
 DW 20.800 usec  
 DE 6.00 usec  
 TE 300.0 K  
 D1 2.00000000 sec  
 D11 0.03000000 sec  
 TD0 1

==== CHANNEL f1 =====  
 NUC1 13C  
 P1 40.00 usec  
 PL1 -3.00 dB  
 PL1W 60.64365387 W  
 SFO1 100.6228298 MHz

==== CHANNEL f2 =====  
 CPDPRG[2] waltz16  
 NUC2 1H  
 PCPD2 80.00 usec  
 PL2 -1.00 dB  
 PL12 14.39 dB  
 PL13 18.00 dB  
 PL2W 12.17476940 W  
 PL12W 0.35193357 W  
 PL13W 0.15327126 W  
 SFO2 400.1316005 MHz

F2 - Processing parameters  
 SI 32768  
 SF 100.6126814 MHz  
 WDW EM  
 SSB 0  
 LB 1.00 Hz  
 GB 0  
 PC 1.40

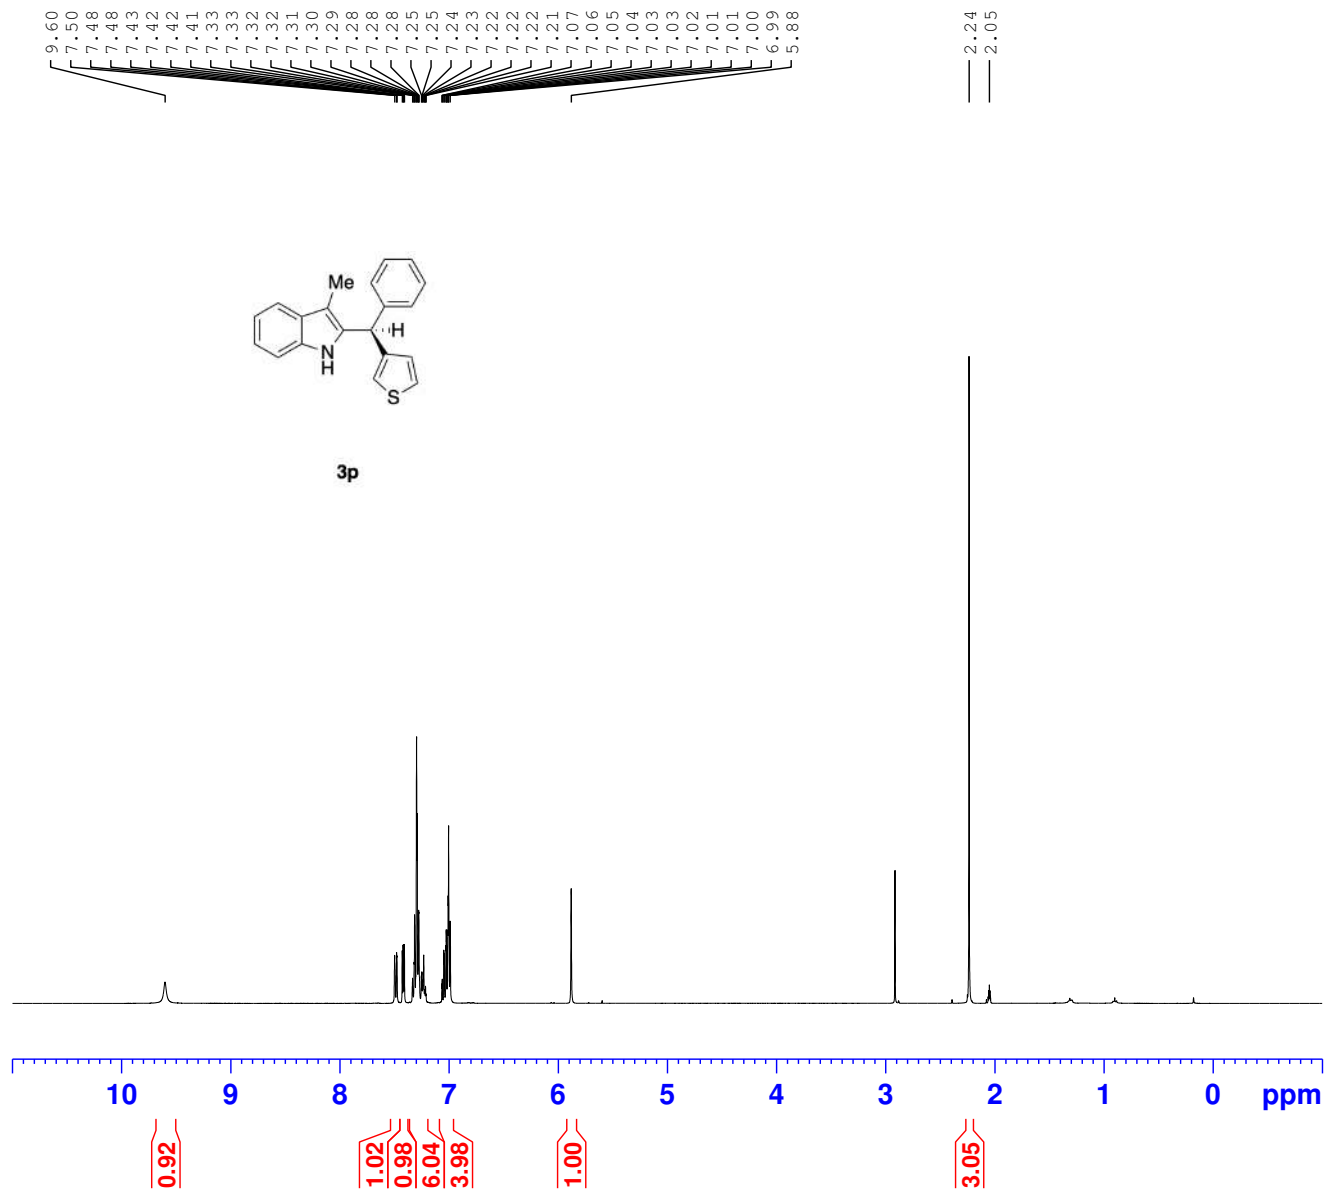

Current Data Parameters  
 NAME YQL-2-67  
 EXPNO 1  
 PROCNO 1

F2 - Acquisition Parameters  
 Date\_ 20210921  
 Time 9.04  
 INSTRUM spect  
 PROBHD 5 mm PABBO BB/  
 PULPROG zg30  
 TD 65536  
 SOLVENT Acetone  
 NS 8  
 DS 0  
 SWH 8012.820 Hz  
 FIDRES 0.122266 Hz  
 AQ 4.0894465 sec  
 RG 31.55  
 DW 62.400 usec  
 DE 6.50 usec  
 TE 297.5 K  
 D1 1.00000000 sec  
 TD0 1

==== CHANNEL f1 =====  
 SFO1 400.1324710 MHz  
 NUC1 1H  
 P1 14.50 usec  
 PLW1 11.99499989 W

F2 - Processing parameters  
 SI 65536  
 SF 400.1300070 MHz  
 WDW EM  
 SSB 0  
 LB 0.30 Hz  
 GB 0  
 PC 1.00

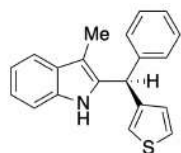

3p

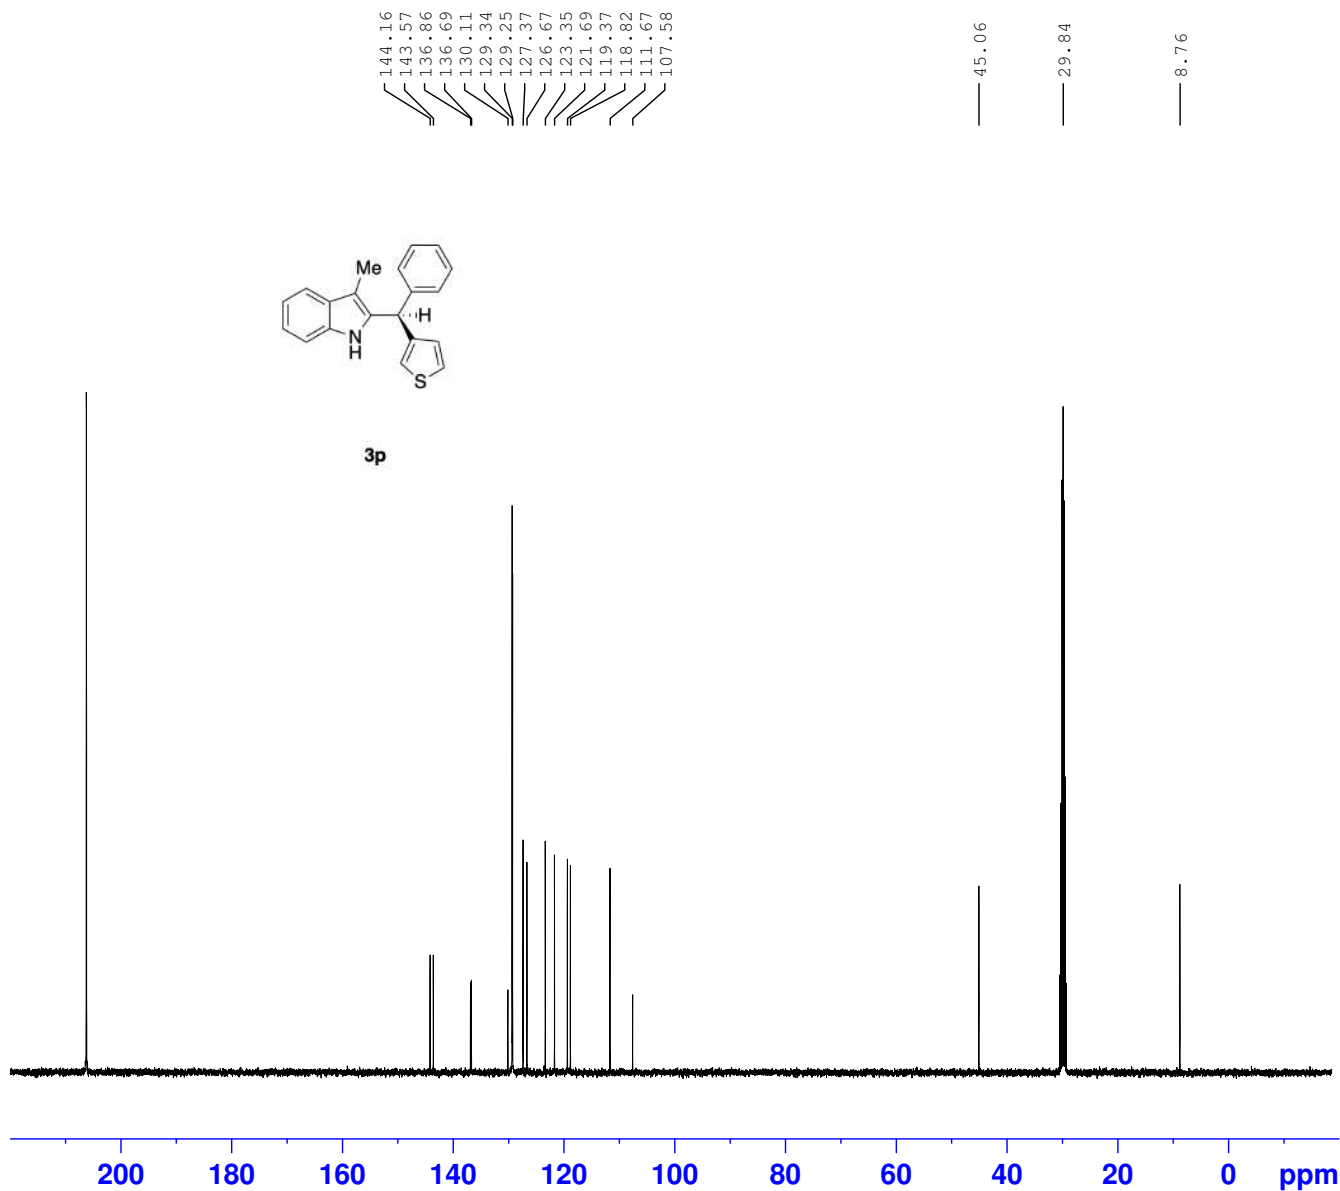

Current Data Parameters  
 NAME YQL-2-67  
 EXPNO 2  
 PROCNO 1

F2 - Acquisition Parameters  
 Date\_ 20210921  
 Time 9.07  
 INSTRUM spect  
 PROBHD 5 mm PABBO BB/  
 PULPROG zgpg30  
 TD 65536  
 SOLVENT Acetone  
 NS 73  
 DS 2  
 SWH 24038.461 Hz  
 FIDRES 0.366798 Hz  
 AQ 1.3631488 sec  
 RG 196.92  
 DW 20.800 usec  
 DE 6.50 usec  
 TE 297.8 K  
 D1 2.00000000 sec  
 D11 0.03000000 sec  
 TD0 1

==== CHANNEL f1 =====  
 SFO1 100.6228298 MHz  
 NUC1 13C  
 P1 9.70 usec  
 PLW1 46.98899841 W

==== CHANNEL f2 =====  
 SFO2 400.1316005 MHz  
 NUC2 1H  
 CPDPRG[2] waltz16  
 PCPD2 90.00 usec  
 PLW2 11.99499989 W  
 PLW12 0.34213999 W  
 PLW13 0.27713001 W

F2 - Processing parameters  
 SI 32768  
 SF 100.6126867 MHz  
 WDW EM  
 SSB 0  
 LB 1.00 Hz  
 GB 0  
 PC 1.40

9.65  
7.55  
7.54  
7.54  
7.48  
7.46  
7.33  
7.32  
7.31  
7.30  
7.30  
7.29  
7.28  
7.28  
7.24  
7.22  
7.05  
7.05  
7.04  
7.03  
7.02  
7.01  
7.01  
6.99  
6.99  
6.98  
6.97  
6.39  
5.68

2.25  
2.05

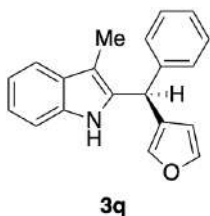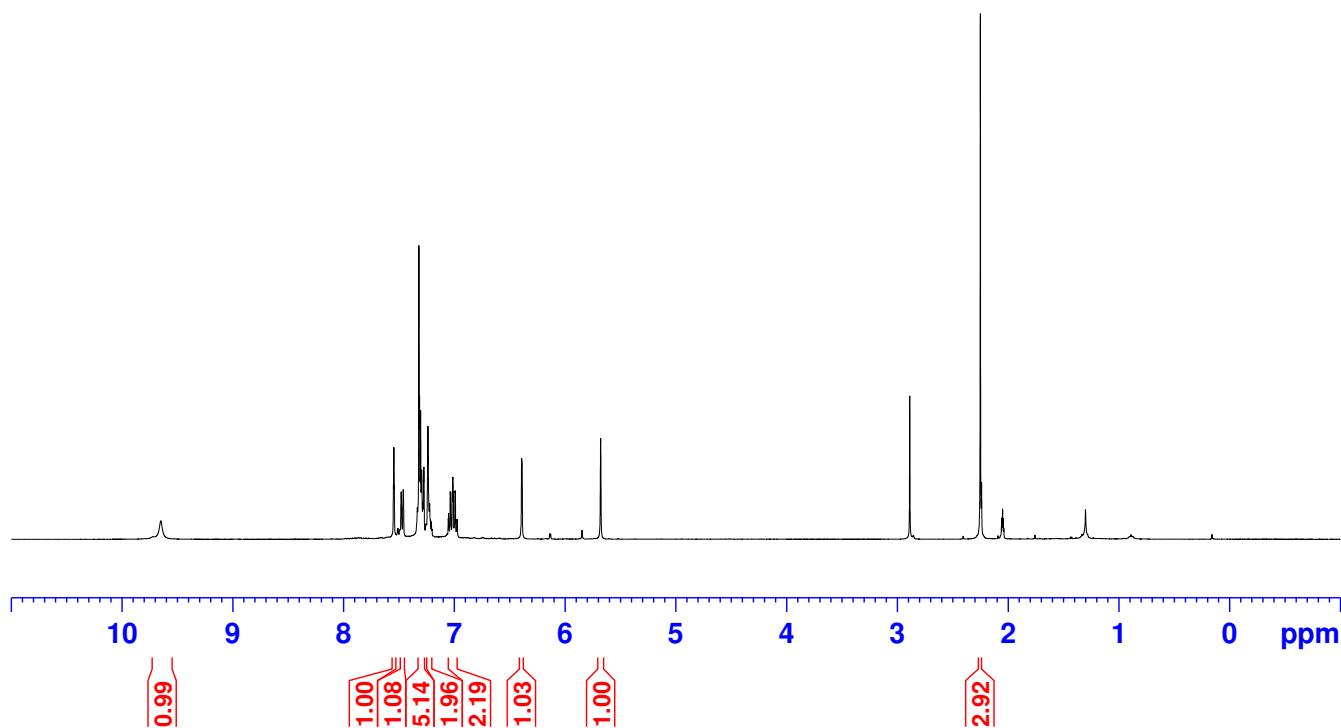

Current Data Parameters  
NAME YQL-2-91-P  
EXPNO 1  
PROCNO 1

F2 - Acquisition Parameters  
Date\_ 20211017  
Time 20.18  
INSTRUM spect  
PROBHD 5 mm PABBO BB/  
PULPROG zg30  
TD 65536  
SOLVENT Acetone  
NS 8  
DS 0  
SWH 8012.820 Hz  
FIDRES 0.122266 Hz  
AQ 4.0894465 sec  
RG 39.46  
DW 62.400 usec  
DE 6.50 usec  
TE 297.2 K  
D1 1.00000000 sec  
TD0 1

==== CHANNEL f1 =====  
SFO1 400.1324710 MHz  
NUC1 1H  
P1 14.50 usec  
PLW1 11.99499989 W

F2 - Processing parameters  
SI 65536  
SF 400.1300071 MHz  
WDW EM  
SSB 0  
LB 0.30 Hz  
GB 0  
PC 1.00

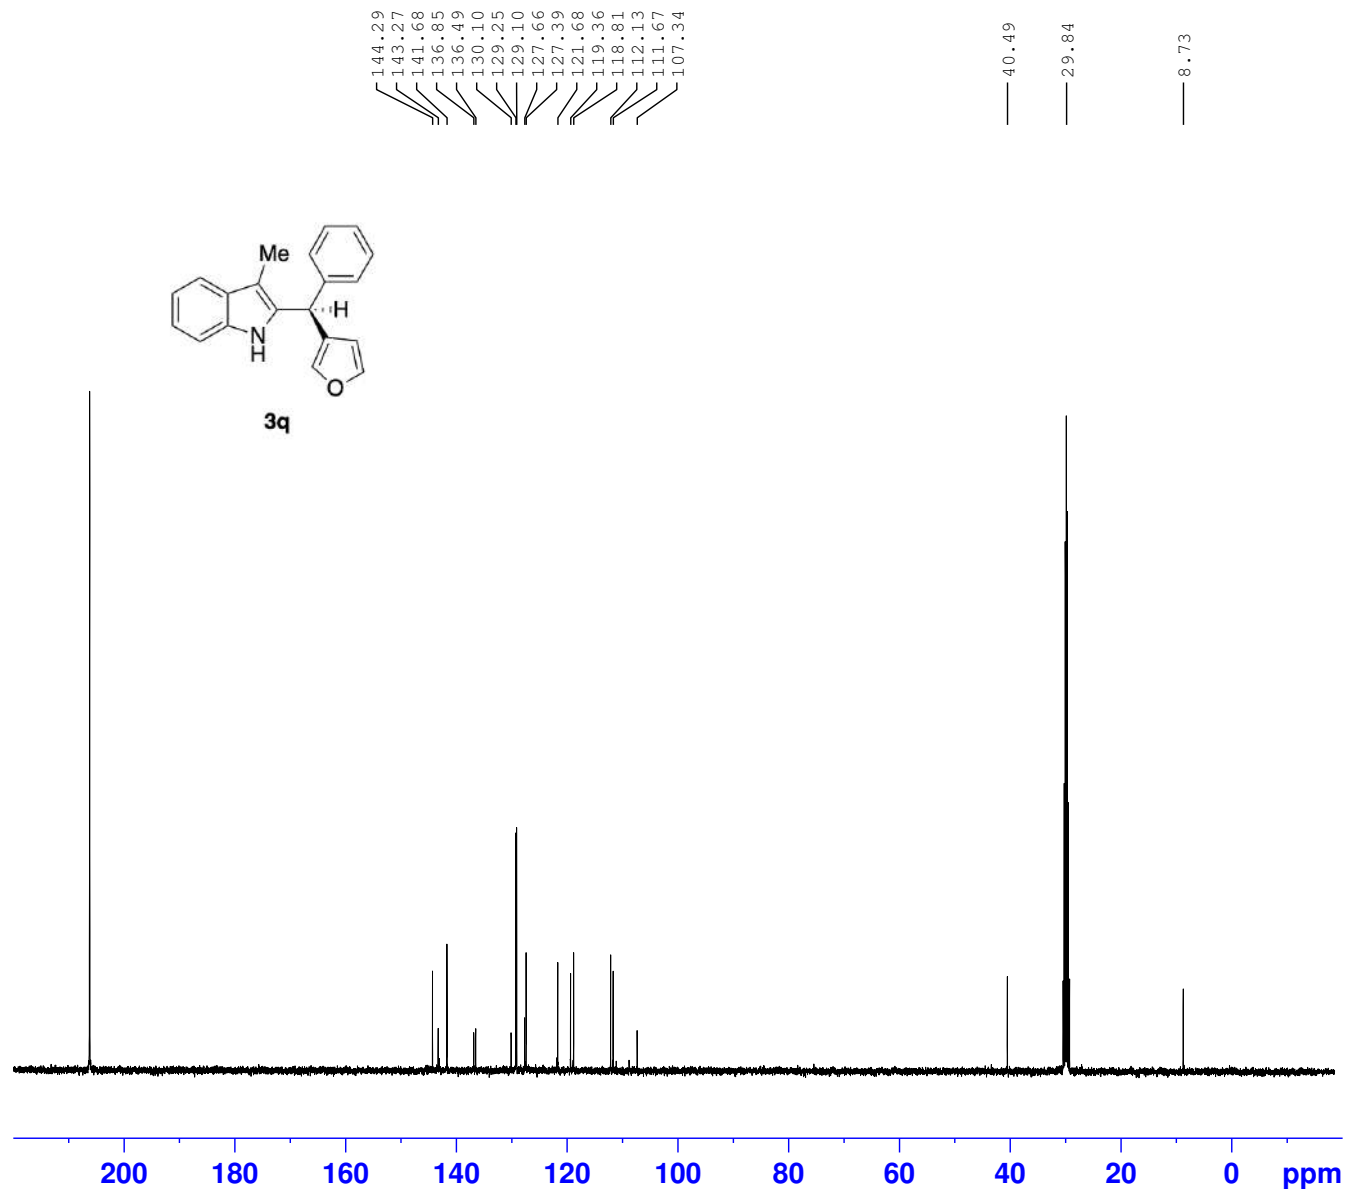

Current Data Parameters  
 NAME YQL-2-91-P  
 EXPNO 2  
 PROCNO 1

F2 - Acquisition Parameters  
 Date\_ 20211017  
 Time 20.21  
 INSTRUM spect  
 PROBHD 5 mm PABBO BB/  
 PULPROG zgpg30  
 TD 65536  
 SOLVENT Acetone  
 NS 53  
 DS 2  
 SWH 24038.461 Hz  
 FIDRES 0.366798 Hz  
 AQ 1.3631488 sec  
 RG 196.92  
 DW 20.800 usec  
 DE 6.50 usec  
 TE 297.9 K  
 D1 2.0000000 sec  
 D11 0.0300000 sec  
 TD0 1

==== CHANNEL f1 =====  
 SFO1 100.6228298 MHz  
 NUC1 13C  
 P1 9.70 usec  
 PLW1 46.98899841 W

==== CHANNEL f2 =====  
 SFO2 400.1316005 MHz  
 NUC2 1H  
 CPDPRG[2] waltz16  
 PCPD2 90.00 usec  
 PLW2 11.99499989 W  
 PLW12 0.34213999 W  
 PLW13 0.27713001 W

F2 - Processing parameters  
 SI 32768  
 SF 100.6126831 MHz  
 WDW EM  
 SSB 0  
 LB 1.00 Hz  
 GB 0  
 PC 1.40

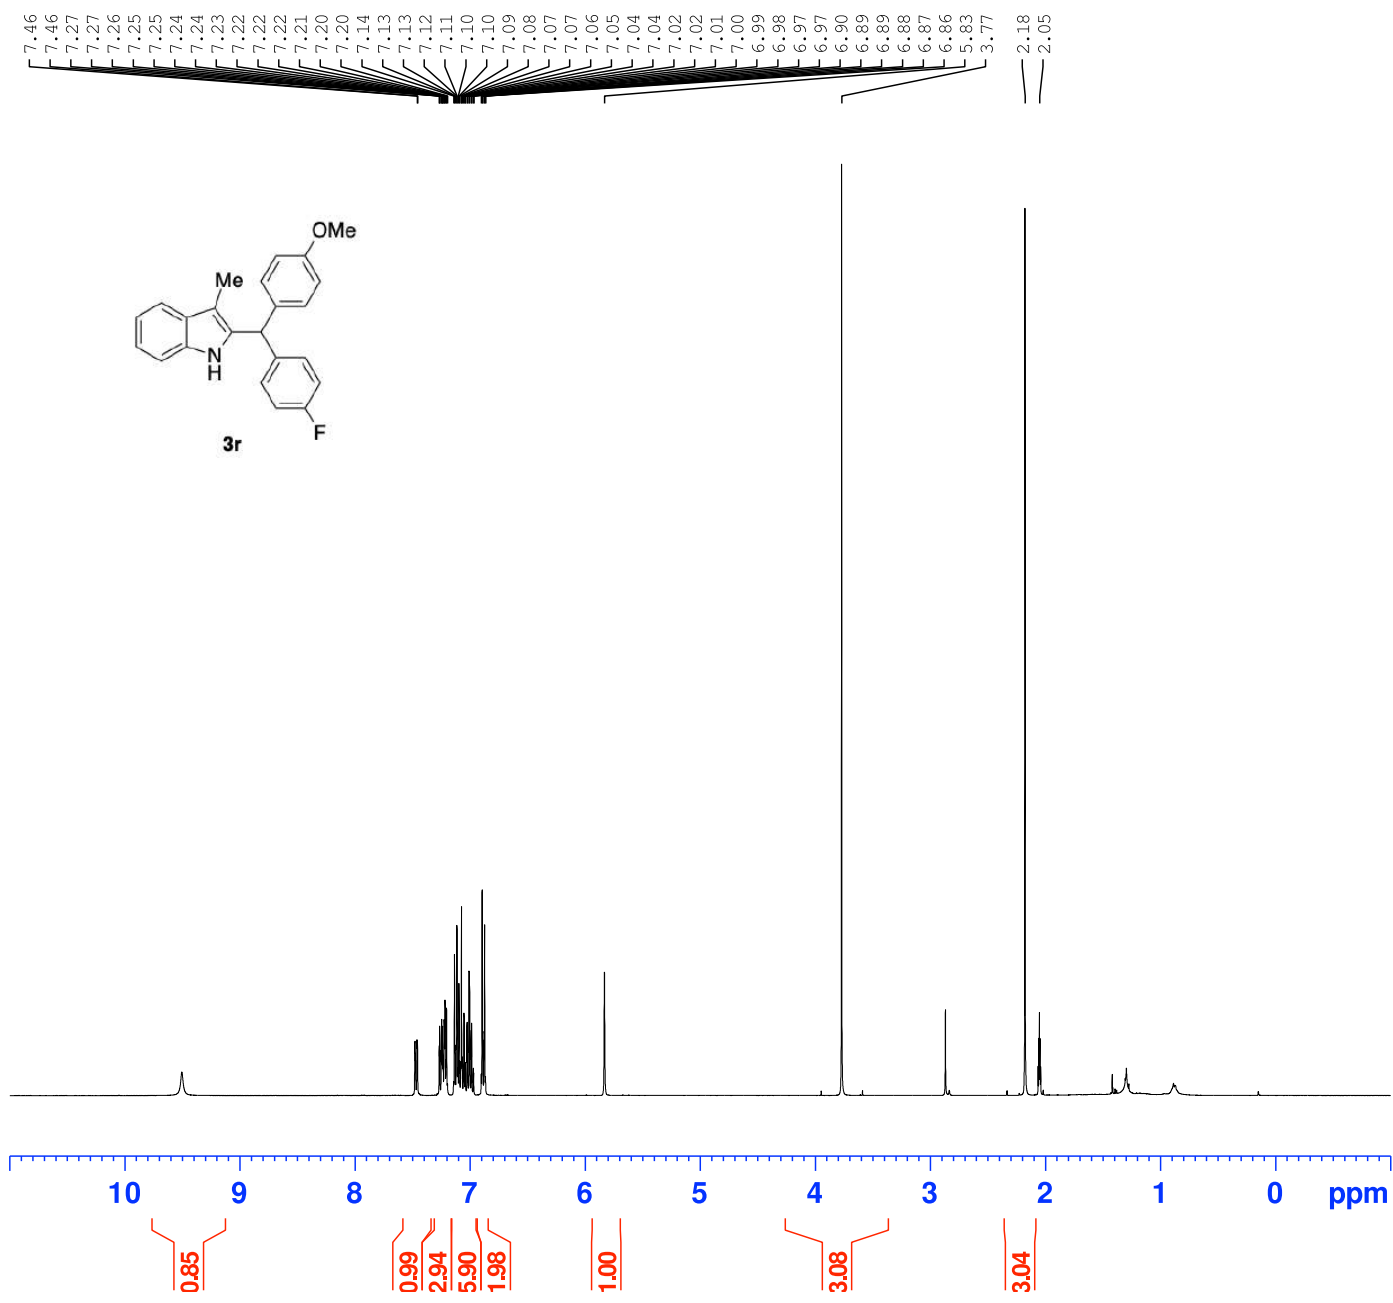

```

Current Data Parameters
NAME          YQL-2-186-P
EXPNO         1
PROCNO        1

F2 - Acquisition Parameters
Date_         20220308
Time          14.04
INSTRUM       spect
PROBHD        5 mm PABBO BB/
PULPROG       zg30
TD            65536
SOLVENT       Acetone
NS            8
DS            0
SWH           8012.820 Hz
FIDRES        0.122266 Hz
AQ            4.0894465 sec
RG            70.97
DW            62.400 usec
DE            6.50 usec
TE            294.7 K
D1            1.00000000 sec
TD0           1

===== CHANNEL f1 =====
SFO1          400.1324710 MHz
NUC1          1H
P1            14.50 usec
PLW1          11.99499989 W

F2 - Processing parameters
SI            65536
SF            400.1300070 MHz
WDW           EM
SSB           0
LB            0.30 Hz
GB            0
PC            1.00

```

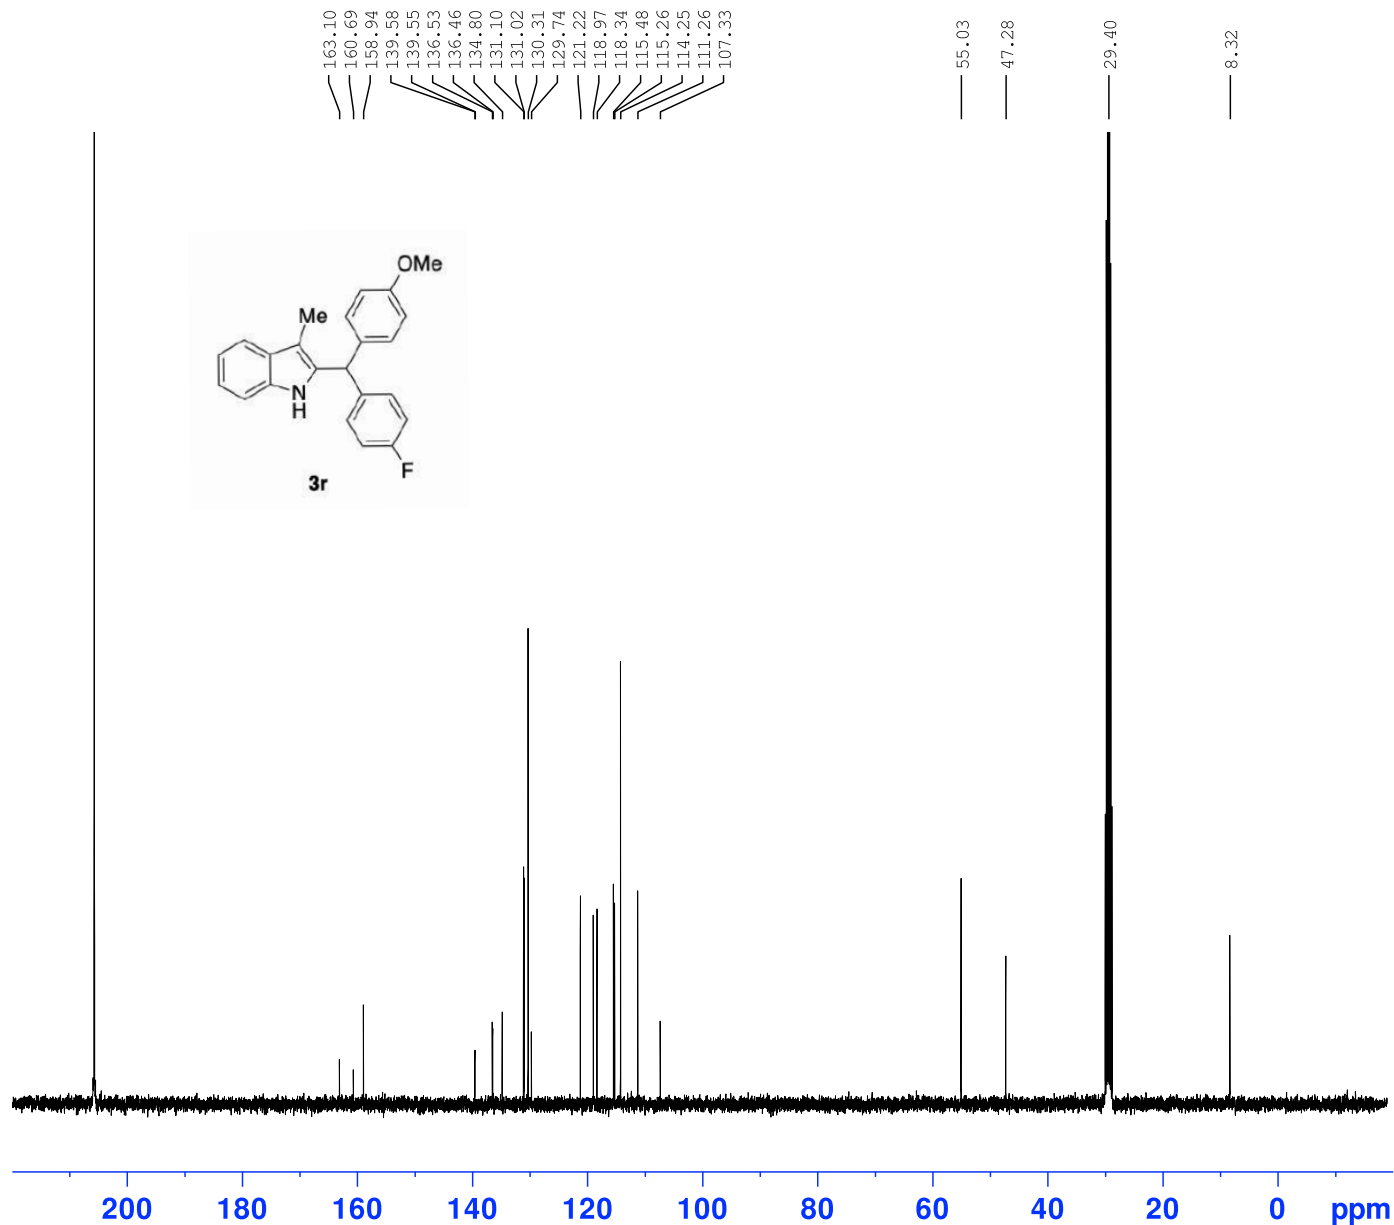

Current Data Parameters  
 NAME YQL-2-186-P  
 EXPNO 2  
 PROCNO 1

F2 - Acquisition Parameters  
 Date\_ 20220308  
 Time 14.06  
 INSTRUM spect  
 PROBHD 5 mm PABBO BB/  
 PULPROG zgpg30  
 TD 65536  
 SOLVENT Acetone  
 NS 94  
 DS 2  
 SWH 24038.461 Hz  
 FIDRES 0.366798 Hz  
 AQ 1.3631488 sec  
 RG 196.92  
 DW 20.800 usec  
 DE 6.50 usec  
 TE 295.2 K  
 D1 2.00000000 sec  
 D11 0.03000000 sec  
 TD0 1

==== CHANNEL f1 =====  
 SFO1 100.6228298 MHz  
 NUC1 13C  
 P1 9.70 usec  
 PLW1 46.98899841 W

==== CHANNEL f2 =====  
 SFO2 400.1316005 MHz  
 NUC2 1H  
 CPDPRG[2] waltz16  
 PCPD2 90.00 usec  
 PLW2 11.99499989 W  
 PLW12 0.34213999 W  
 PLW13 0.27713001 W

F2 - Processing parameters  
 SI 32768  
 SF 100.6127258 MHz  
 WDW EM  
 SSB 0  
 LB 1.00 Hz  
 GB 0  
 PC 1.40



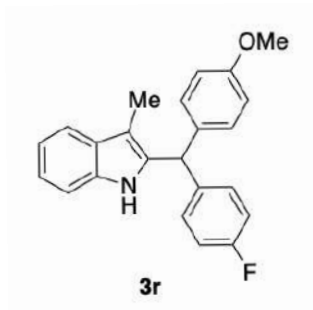

— -118.35

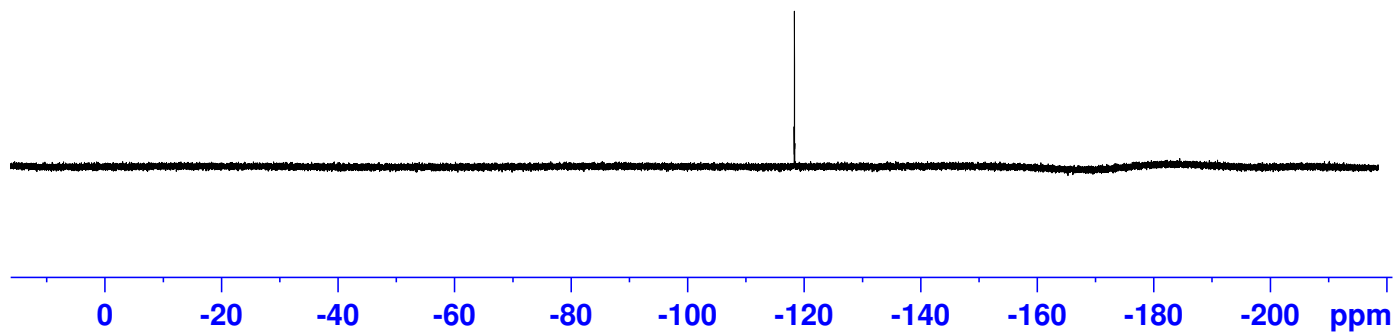

Current Data Parameters  
 NAME YQL-2-186-F  
 EXPNO 1  
 PROCNO 1

F2 - Acquisition Parameters  
 Date\_ 20220308  
 Time 16.16  
 INSTRUM spect  
 PROBHD 5 mm PABBO BB/  
 PULPROG zgflqn  
 TD 131072  
 SOLVENT Acetone  
 NS 16  
 DS 4  
 SWH 89285.711 Hz  
 FIDRES 0.681196 Hz  
 AQ 0.7340032 sec  
 RG 196.92  
 DW 5.600 usec  
 DE 6.50 usec  
 TE 294.5 K  
 D1 1.00000000 sec  
 TD0 1

==== CHANNEL f1 =====  
 SFO1 376.4607164 MHz  
 NUC1 19F  
 P1 14.70 usec  
 PLW1 15.99600029 W

F2 - Processing parameters  
 SI 65536  
 SF 376.4983660 MHz  
 WDW EM  
 SSB 0  
 LB 0.30 Hz  
 GB 0  
 PC 1.00

```

=====
Acq. Operator   :                               Seq. Line :    2
Acq. Instrument : Instrument 1                   Location  : Vial 51
Injection Date  : 8/11/2021 10:38:43 AM         Inj       :    1
                                           Inj Volume: 5.000 µl
Different Inj Volume from Sequence ! Actual Inj Volume : 10.000 µl
Acq. Method    : C:\CHEM32\1\DATA\SUN_12 2021-08-11 10-25-30\AD-05-15.M
Last changed   : 8/11/2021 10:37:49 AM
                                           (modified after loading)
Analysis Method : C:\CHEM32\1\METHODS\IC-07-60-0.5ML.M
Last changed   : 8/27/2021 3:46:19 PM
                                           (modified after loading)
Additional Info : Peak(s) manually integrated
  
```

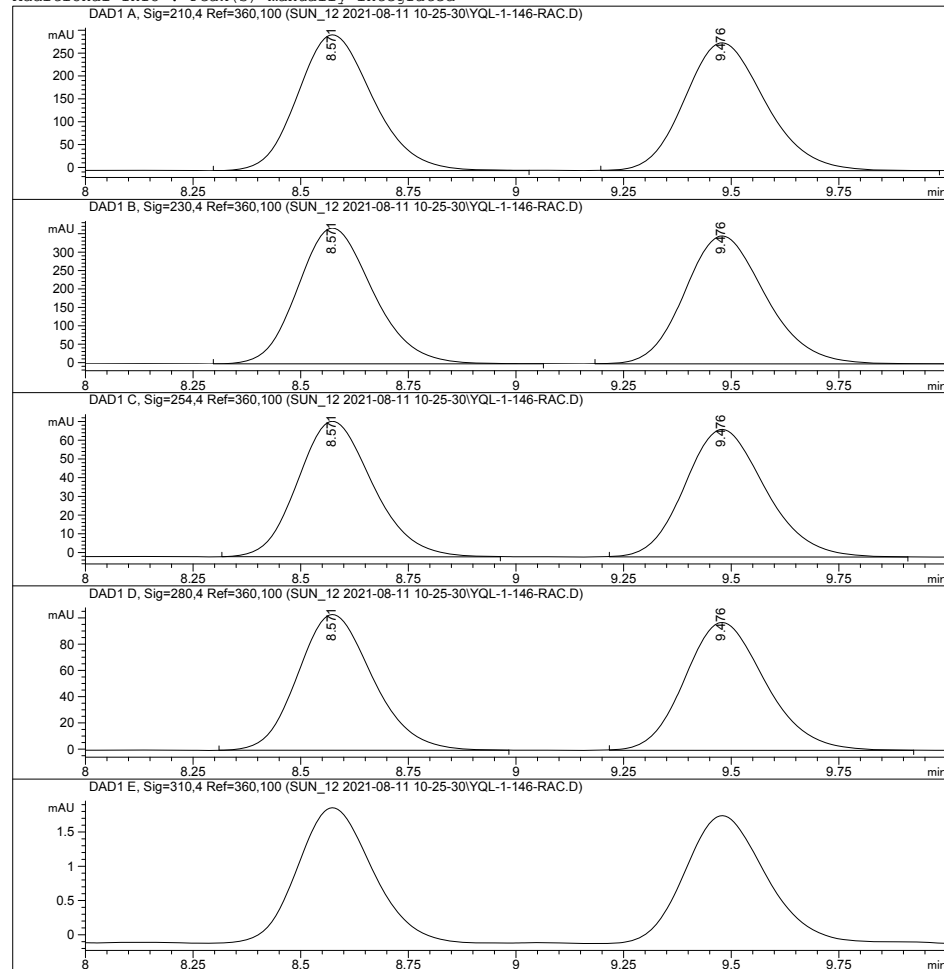

```

=====
                          Area Percent Report
=====
Sorted By      :      Signal
Multiplier    :      1.0000
Dilution      :      1.0000
Use Multiplier & Dilution Factor with ISTDs
  
```

Signal 1: DAD1 A, Sig=210,4 Ref=360,100

| Peak # | RetTime [min] | Type | Width [min] | Area [mAU*s] | Height [mAU] | Area %  |
|--------|---------------|------|-------------|--------------|--------------|---------|
| 1      | 8.571         | BB   | 0.1881      | 3613.95630   | 296.79227    | 49.6342 |
| 2      | 9.476         | BB   | 0.2031      | 3667.21826   | 279.50912    | 50.3658 |

Totals : 7281.17456 576.30139

Signal 2: DAD1 B, Sig=230,4 Ref=360,100

| Peak # | RetTime [min] | Type | Width [min] | Area [mAU*s] | Height [mAU] | Area %  |
|--------|---------------|------|-------------|--------------|--------------|---------|
| 1      | 8.571         | BB   | 0.1879      | 4483.67773   | 368.59171    | 49.5923 |
| 2      | 9.476         | BB   | 0.2030      | 4557.39648   | 347.40057    | 50.4077 |

Totals : 9041.07422 715.99228

Signal 3: DAD1 C, Sig=254,4 Ref=360,100

| Peak # | RetTime [min] | Type | Width [min] | Area [mAU*s] | Height [mAU] | Area %  |
|--------|---------------|------|-------------|--------------|--------------|---------|
| 1      | 8.571         | BB   | 0.1875      | 877.68146    | 72.37300     | 49.5958 |
| 2      | 9.476         | BB   | 0.2026      | 891.98700    | 68.17650     | 50.4042 |

Totals : 1769.66846 140.54950

Signal 4: DAD1 D, Sig=280,4 Ref=360,100

| Peak # | RetTime [min] | Type | Width [min] | Area [mAU*s] | Height [mAU] | Area %  |
|--------|---------------|------|-------------|--------------|--------------|---------|
| 1      | 8.571         | BB   | 0.1874      | 1252.94751   | 103.37744    | 49.5858 |
| 2      | 9.476         | BB   | 0.2026      | 1273.88074   | 97.40432     | 50.4142 |

Totals : 2526.82825 200.78176

Signal 5: DAD1 E, Sig=310,4 Ref=360,100

\*\*\* End of Report \*\*\*

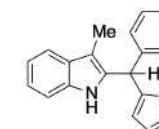

**3a**  
(racemic)

Data File C:\CHEM32\1\DATA\SUN\_12 2021-07-16 16-35-36\YQL-1-172-REF.D  
 Sample Name:

```
=====
Acq. Operator   :                               Seq. Line :    2
Acq. Instrument : Instrument 1                   Location  : Vial 53
Injection Date  : 7/16/2021 4:48:48 PM          Inj       :    1
                                                Inj Volume: 5.000 µl
Acq. Method    : C:\CHEM32\1\DATA\SUN_12 2021-07-16 16-35-36\AD-05-10.M
Last changed   : 7/16/2021 4:36:08 PM
                (modified after loading)
Analysis Method: C:\CHEM32\1\METHODS\IC-07-60-0.5ML.M
Last changed   : 8/27/2021 10:26:07 AM
                (modified after loading)
Additional Info : Peak(s) manually integrated
=====
```

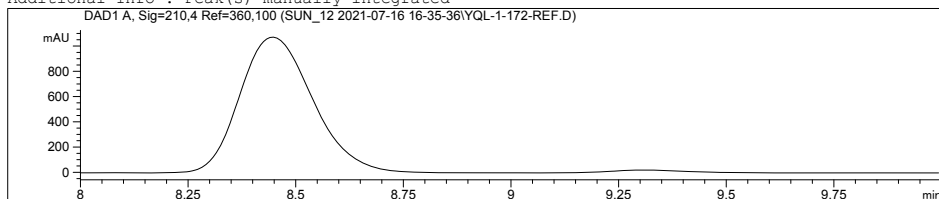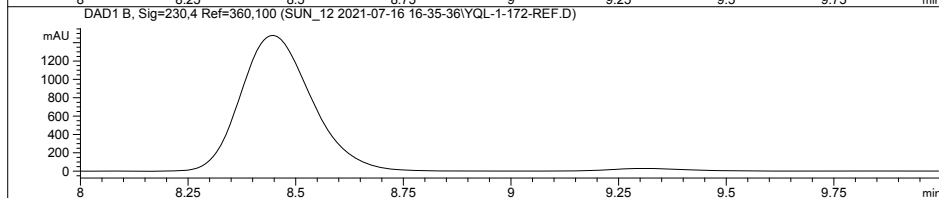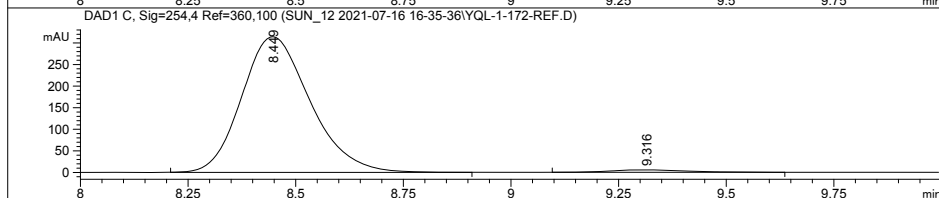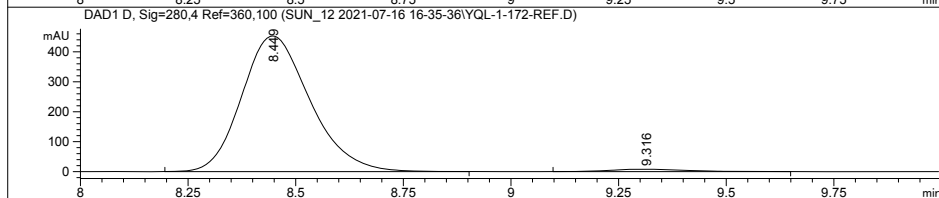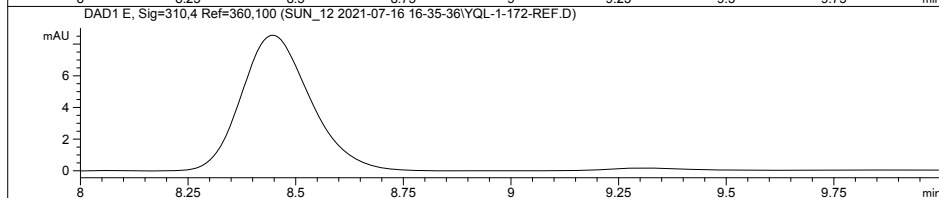

Data File C:\CHEM32\1\DATA\SUN\_12 2021-07-16 16-35-36\YQL-1-172-REF.D  
 Sample Name:

```
=====
                          Area Percent Report
=====
Sorted By      :      Signal
Multiplier    :      1.0000
Dilution      :      1.0000
Use Multiplier & Dilution Factor with ISTDs
=====
```

Signal 1: DAD1 A, Sig=210,4 Ref=360,100

Signal 2: DAD1 B, Sig=230,4 Ref=360,100

Signal 3: DAD1 C, Sig=254,4 Ref=360,100

| Peak # | RetTime [min] | Type | Width [min] | Area [mAU*s] | Height [mAU] | Area %  |
|--------|---------------|------|-------------|--------------|--------------|---------|
| 1      | 8.449         | BB   | 0.1709      | 3474.59839   | 314.54010    | 98.0495 |
| 2      | 9.316         | BB   | 0.1874      | 69.11983     | 5.70412      | 1.9505  |

Totals : 3543.71822 320.24422

Signal 4: DAD1 D, Sig=280,4 Ref=360,100

| Peak # | RetTime [min] | Type | Width [min] | Area [mAU*s] | Height [mAU] | Area %  |
|--------|---------------|------|-------------|--------------|--------------|---------|
| 1      | 8.449         | BB   | 0.1706      | 4996.17725   | 453.10181    | 98.1095 |
| 2      | 9.316         | BB   | 0.1830      | 96.27036     | 8.08061      | 1.8905  |

Totals : 5092.44761 461.18242

Signal 5: DAD1 E, Sig=310,4 Ref=360,100

\*\*\* End of Report \*\*\*

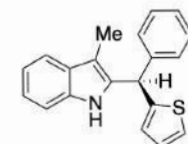

**3a**  
(enantioenriched)

Sample Name:

```

=====
Acq. Operator   :                               Seq. Line :    8
Acq. Instrument : Instrument 1                   Location  : Vial 61
Injection Date  : 7/23/2021 1:17:46 PM          Inj       :    1
                                           Inj Volume: 5.000 µl
Different Inj Volume from Sequence ! Actual Inj Volume : 10.000 µl
Acq. Method    : C:\CHEM32\1\DATA\SUN_12 2021-07-23 09-32-13\AD-05-20.M
Last changed   : 7/23/2021 1:16:51 PM
                (modified after loading)
Analysis Method : C:\CHEM32\1\METHODS\IC-07-60-0.5ML.M
Last changed   : 8/27/2021 4:02:07 PM
                (modified after loading)
Additional Info : Peak(s) manually integrated
  
```

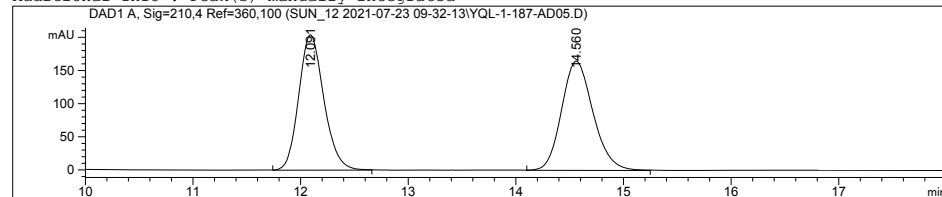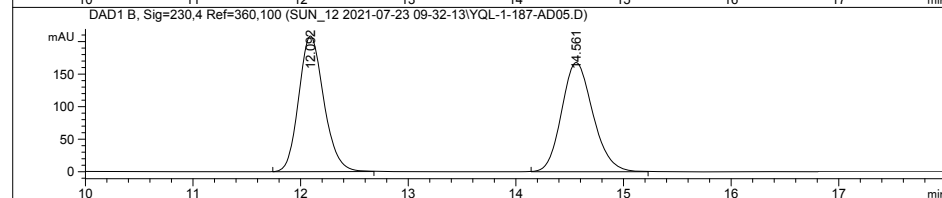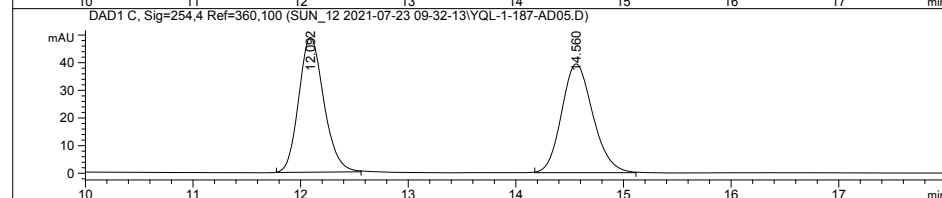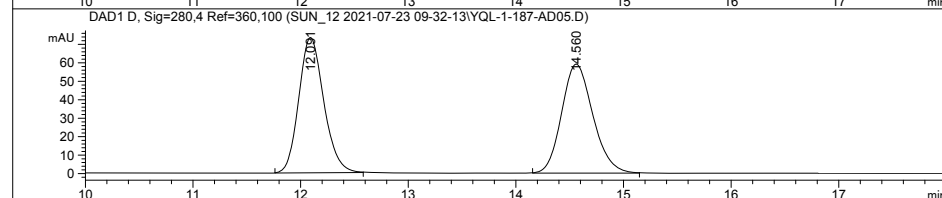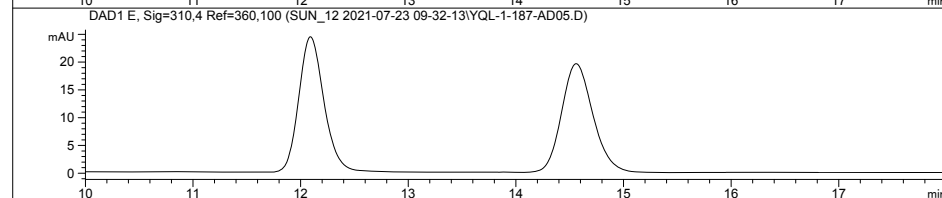

Sample Name:

```

=====
                          Area Percent Report
=====
Sorted By      :      Signal
Multiplier    :      1.0000
Dilution      :      1.0000
Use Multiplier & Dilution Factor with ISTDs
  
```

Signal 1: DAD1 A, Sig=210,4 Ref=360,100

| Peak # | RetTime [min] | Type | Width [min] | Area [mAU*s] | Height [mAU] | Area %  |
|--------|---------------|------|-------------|--------------|--------------|---------|
| 1      | 12.091        | BB   | 0.2486      | 3301.54468   | 204.24109    | 49.6654 |
| 2      | 14.560        | BB   | 0.3130      | 3346.02930   | 164.74232    | 50.3346 |

Totals : 6647.57397 368.98341

Signal 2: DAD1 B, Sig=230,4 Ref=360,100

| Peak # | RetTime [min] | Type | Width [min] | Area [mAU*s] | Height [mAU] | Area %  |
|--------|---------------|------|-------------|--------------|--------------|---------|
| 1      | 12.092        | BB   | 0.2485      | 3366.98438   | 208.40799    | 49.8763 |
| 2      | 14.561        | BB   | 0.3113      | 3383.68262   | 167.76050    | 50.1237 |

Totals : 6750.66699 376.16849

Signal 3: DAD1 C, Sig=254,4 Ref=360,100

| Peak # | RetTime [min] | Type | Width [min] | Area [mAU*s] | Height [mAU] | Area %  |
|--------|---------------|------|-------------|--------------|--------------|---------|
| 1      | 12.092        | BB   | 0.2480      | 786.85205    | 48.82372     | 49.8192 |
| 2      | 14.560        | BB   | 0.3109      | 792.56238    | 39.35765     | 50.1808 |

Totals : 1579.41443 88.18137

Signal 4: DAD1 D, Sig=280,4 Ref=360,100

| Peak # | RetTime [min] | Type | Width [min] | Area [mAU*s] | Height [mAU] | Area %  |
|--------|---------------|------|-------------|--------------|--------------|---------|
| 1      | 12.091        | BB   | 0.2479      | 1181.10925   | 73.35355     | 49.8207 |
| 2      | 14.560        | BB   | 0.3110      | 1189.61121   | 59.06180     | 50.1793 |

Totals : 2370.72046 132.41536

Signal 5: DAD1 E, Sig=310,4 Ref=360,100

\*\*\* End of Report \*\*\*

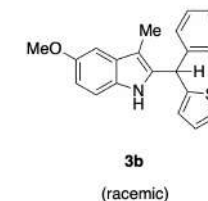

Sample Name:

```

=====
Acq. Operator   :                               Seq. Line :    2
Acq. Instrument : Instrument 1                   Location  : Vial 62
Injection Date  : 7/25/2021 3:38:13 PM          Inj       :    1
                                                Inj Volume: 5.000 µl
Acq. Method    : C:\CHEM32\1\DATA\SUN_12 2021-07-25 15-21-52\AD-05-20.M
Last changed   : 7/25/2021 3:37:20 PM
                (modified after loading)
Analysis Method: C:\CHEM32\1\METHODS\IC-07-60-0.5ML.M
Last changed   : 8/27/2021 10:49:34 AM
                (modified after loading)
Additional Info : Peak(s) manually integrated
  
```

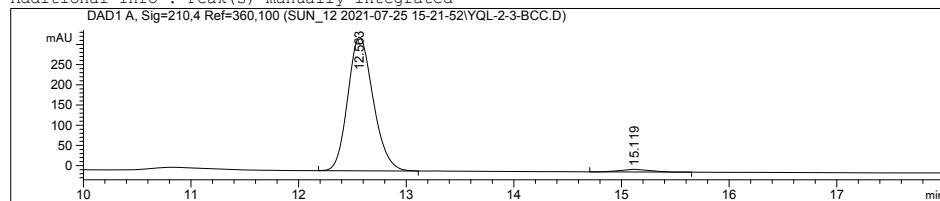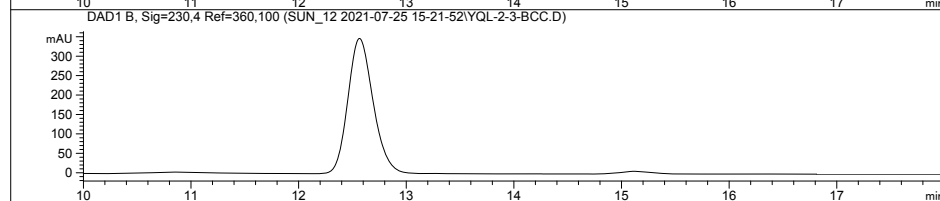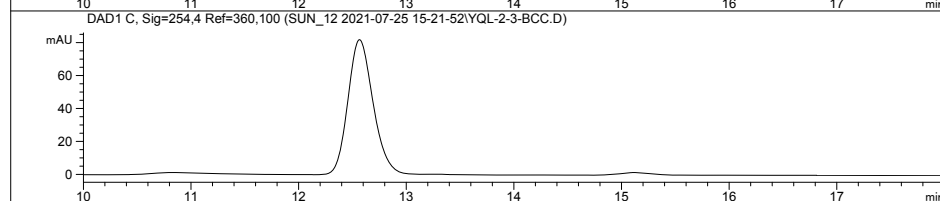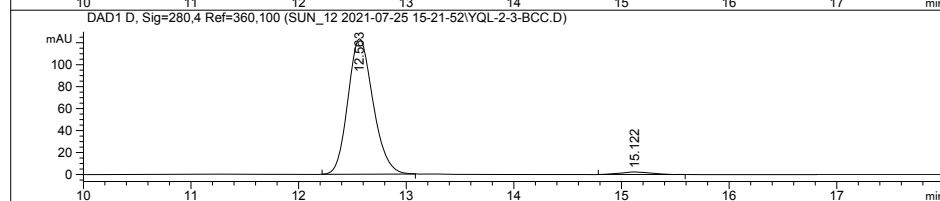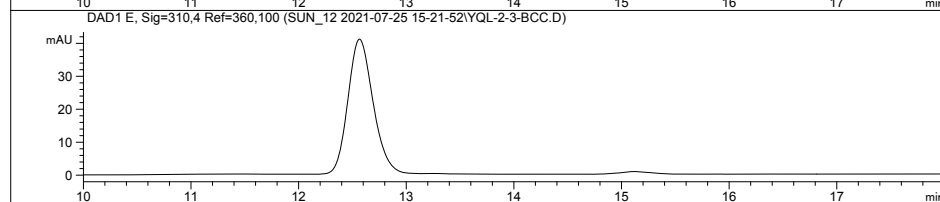

Sample Name:

```

=====
                          Area Percent Report
=====
Sorted By      :      Signal
Multiplier     :      1.0000
Dilution      :      1.0000
Use Multiplier & Dilution Factor with ISTDs
  
```

Signal 1: DAD1 A, Sig=210,4 Ref=360,100

| Peak # | RetTime [min] | Type | Width [min] | Area [mAU*s] | Height [mAU] | Area %  |
|--------|---------------|------|-------------|--------------|--------------|---------|
| 1      | 12.563        | BB   | 0.2532      | 5422.80713   | 330.83133    | 97.8119 |
| 2      | 15.119        | BB   | 0.2548      | 121.31109    | 6.46816      | 2.1881  |

Totals : 5544.11822 337.29949

Signal 2: DAD1 B, Sig=230,4 Ref=360,100

Signal 3: DAD1 C, Sig=254,4 Ref=360,100

Signal 4: DAD1 D, Sig=280,4 Ref=360,100

| Peak # | RetTime [min] | Type | Width [min] | Area [mAU*s] | Height [mAU] | Area %  |
|--------|---------------|------|-------------|--------------|--------------|---------|
| 1      | 12.563        | BB   | 0.2491      | 1998.53906   | 123.29641    | 97.7410 |
| 2      | 15.122        | BB   | 0.2928      | 46.19011     | 2.35510      | 2.2590  |

Totals : 2044.72918 125.65150

Signal 5: DAD1 E, Sig=310,4 Ref=360,100

\*\*\* End of Report \*\*\*

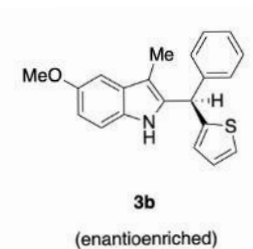

```

=====
Acq. Operator   :                               Seq. Line : 21
Acq. Instrument : Instrument 1                  Location  : Vial 62
Injection Date  : 6/10/2021 8:53:19 PM        Inj       : 1
                                                Inj Volume: 5.000 µl
Different Inj Volume from Sequence ! Actual Inj Volume : 4.000 µl
Acq. Method    : C:\CHEM32\1\DATA\SUN_12 2021-06-10 14-52-38\AD-03-30.M
Last changed   : 6/10/2021 8:52:26 PM
              (modified after loading)
Analysis Method : C:\CHEM32\1\METHODS\IC-07-60-0.5ML.M
Last changed   : 8/27/2021 3:52:45 PM
              (modified after loading)
Additional Info : Peak(s) manually integrated
  
```

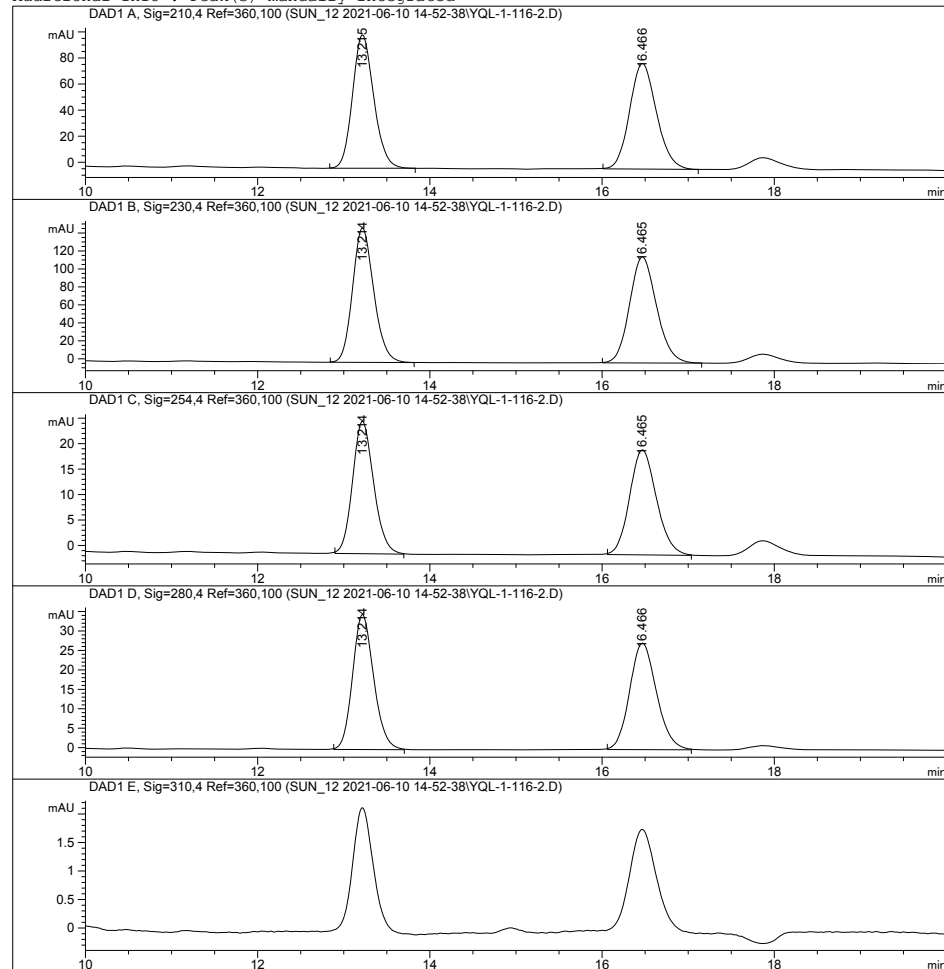

```

=====
                          Area Percent Report
=====
Sorted By      :      Signal
Multiplier     :      1.0000
Dilution       :      1.0000
Use Multiplier & Dilution Factor with ISTDs
  
```

Signal 1: DAD1 A, Sig=210,4 Ref=360,100

| Peak #   | RetTime [min] | Type | Width [min] | Area [mAU*s] | Height [mAU] | Area %  |
|----------|---------------|------|-------------|--------------|--------------|---------|
| 1        | 13.215        | BB   | 0.2637      | 1753.14038   | 102.41386    | 49.9503 |
| 2        | 16.466        | BB   | 0.3349      | 1756.63147   | 81.04115     | 50.0497 |
| Totals : |               |      |             | 3509.77185   | 183.45502    |         |

Signal 2: DAD1 B, Sig=230,4 Ref=360,100

| Peak #   | RetTime [min] | Type | Width [min] | Area [mAU*s] | Height [mAU] | Area %  |
|----------|---------------|------|-------------|--------------|--------------|---------|
| 1        | 13.214        | BB   | 0.2635      | 2556.78418   | 149.50371    | 49.8842 |
| 2        | 16.465        | BB   | 0.3360      | 2568.64966   | 117.98009    | 50.1158 |
| Totals : |               |      |             | 5125.43384   | 267.48380    |         |

Signal 3: DAD1 C, Sig=254,4 Ref=360,100

| Peak #   | RetTime [min] | Type | Width [min] | Area [mAU*s] | Height [mAU] | Area %  |
|----------|---------------|------|-------------|--------------|--------------|---------|
| 1        | 13.214        | BB   | 0.2628      | 443.21017    | 26.01645     | 49.7734 |
| 2        | 16.465        | BB   | 0.3330      | 447.24557    | 20.62712     | 50.2266 |
| Totals : |               |      |             | 890.45575    | 46.64356     |         |

Signal 4: DAD1 D, Sig=280,4 Ref=360,100

| Peak #   | RetTime [min] | Type | Width [min] | Area [mAU*s] | Height [mAU] | Area %  |
|----------|---------------|------|-------------|--------------|--------------|---------|
| 1        | 13.214        | BB   | 0.2626      | 591.20020    | 34.72526     | 49.8822 |
| 2        | 16.466        | BB   | 0.3349      | 593.99365    | 27.40362     | 50.1178 |
| Totals : |               |      |             | 1185.19385   | 62.12888     |         |

Signal 5: DAD1 E, Sig=310,4 Ref=360,100

\*\*\* End of Report \*\*\*

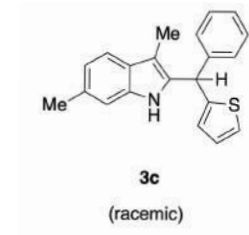

Sample Name:

=====  
 Acq. Operator :                           Seq. Line : 14  
 Acq. Instrument : Instrument 1            Location : Vial 62  
 Injection Date : 7/9/2021 4:08:22 PM   Inj : 1  
                                           Inj Volume : 5.000 µl  
 Acq. Method : C:\CHEM32\1\DATA\SUN\_12 2021-07-09 12-48-23\AD-03-20.M  
 Last changed : 7/2/2016 3:26:02 PM  
 Analysis Method : C:\CHEM32\1\METHODS\IC-07-60-0.5ML.M  
 Last changed : 8/27/2021 10:39:11 AM  
 (modified after loading)

Additional Info : Peak(s) manually integrated

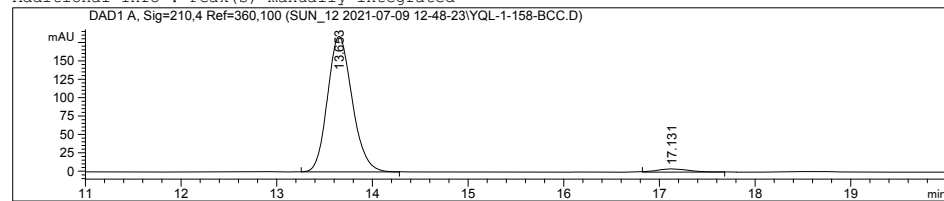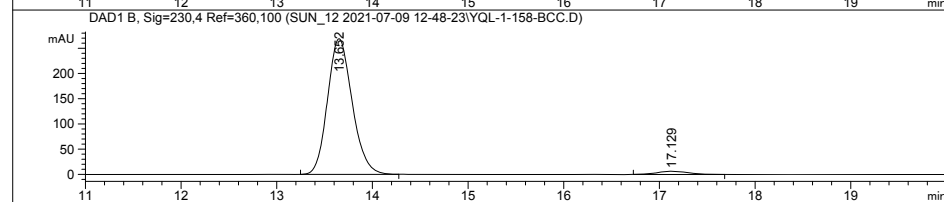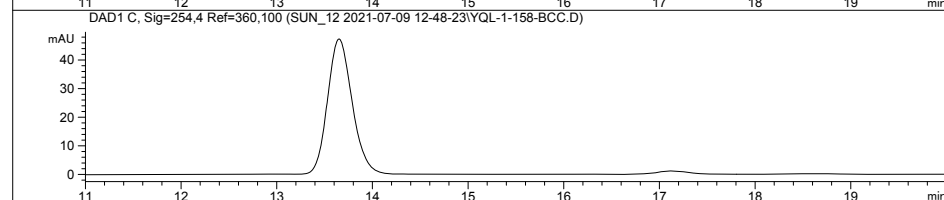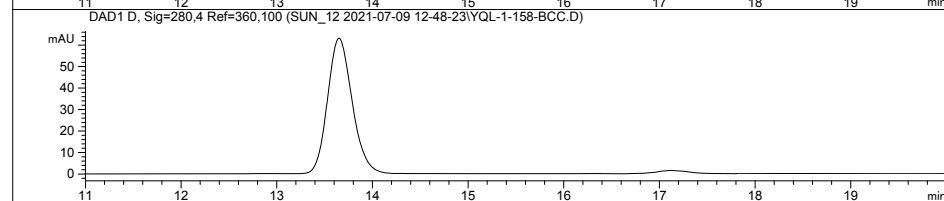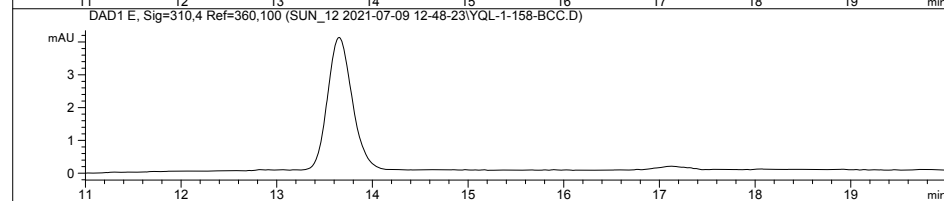

Sample Name:

=====  
 Area Percent Report  
 =====

Sorted By :           Signal  
 Multiplier :        1.0000  
 Dilution :         1.0000  
 Use Multiplier & Dilution Factor with ISTDs

Signal 1: DAD1 A, Sig=210,4 Ref=360,100

| Peak # | RetTime [min] | Type | Width [min] | Area [mAU*s] | Height [mAU] | Area %  |
|--------|---------------|------|-------------|--------------|--------------|---------|
| 1      | 13.653        | BB   | 0.2760      | 3283.48560   | 184.13354    | 97.0568 |
| 2      | 17.131        | BB   | 0.2769      | 99.57059     | 4.45330      | 2.9432  |

Totals :                             3383.05619   188.58685

Signal 2: DAD1 B, Sig=230,4 Ref=360,100

| Peak # | RetTime [min] | Type | Width [min] | Area [mAU*s] | Height [mAU] | Area %  |
|--------|---------------|------|-------------|--------------|--------------|---------|
| 1      | 13.652        | BB   | 0.2761      | 4800.07617   | 269.08270    | 97.1286 |
| 2      | 17.129        | BB   | 0.3333      | 141.90361    | 6.48364      | 2.8714  |

Totals :                             4941.97978   275.56635

Signal 3: DAD1 C, Sig=254,4 Ref=360,100

Signal 4: DAD1 D, Sig=280,4 Ref=360,100

Signal 5: DAD1 E, Sig=310,4 Ref=360,100

=====  
 \*\*\* End of Report \*\*\*

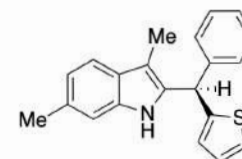

**3c**

(enantioenriched)

Sample Name:

```

=====
Acq. Operator   :                               Seq. Line : 12
Acq. Instrument : Instrument 1                  Location  : Vial 53
Injection Date  : 6/4/2021 2:08:56 PM          Inj       : 1
                                                Inj Volume: 5.000 µl
Different Inj Volume from Sequence ! Actual Inj Volume : 3.000 µl
Acq. Method    : C:\CHEM32\1\DATA\SUN_12 2021-06-04 10-15-26\AD-03-30.M
Last changed   : 6/4/2021 1:05:36 PM
                (modified after loading)
Analysis Method : C:\CHEM32\1\METHODS\IC-07-60-0.5ML.M
Last changed   : 8/27/2021 3:50:28 PM
                (modified after loading)
Additional Info : Peak(s) manually integrated
    
```

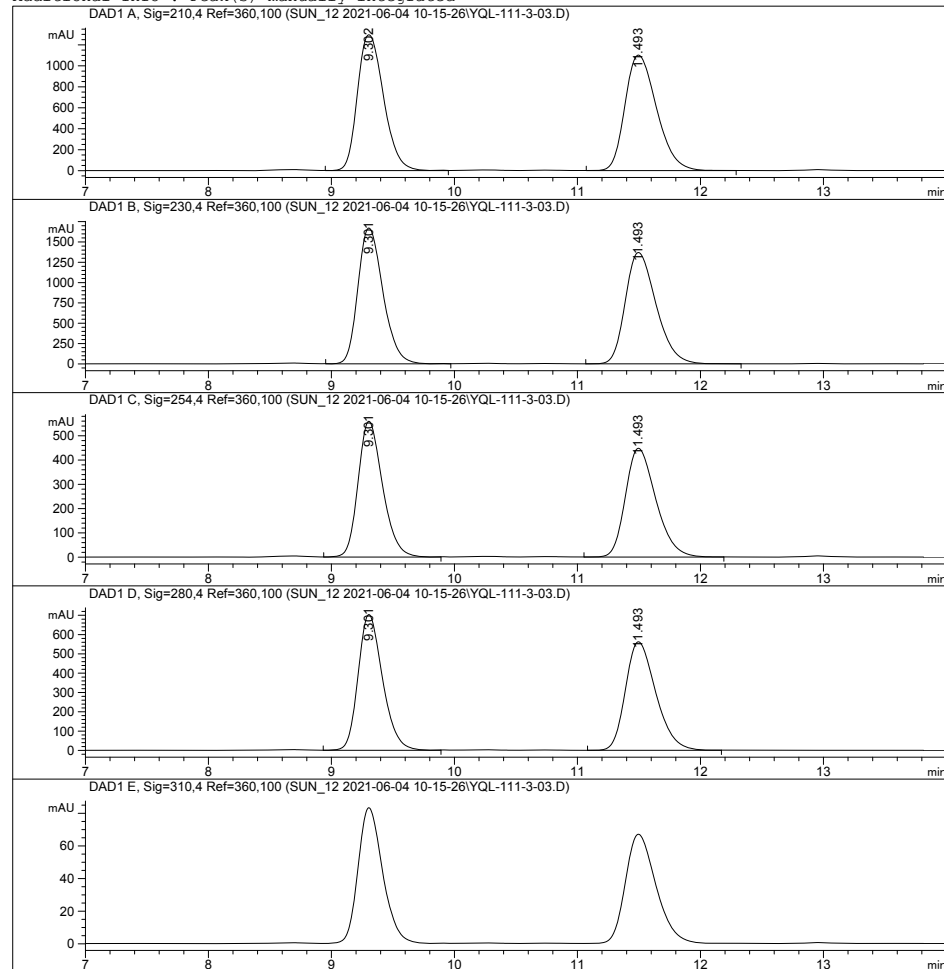

Sample Name:

```

=====
                          Area Percent Report
=====
Sorted By      :      Signal
Multiplier    :      1.0000
Dilution      :      1.0000
Use Multiplier & Dilution Factor with ISTDs
    
```

Signal 1: DAD1 A, Sig=210,4 Ref=360,100

| Peak #   | RetTime [min] | Type | Width [min] | Area [mAU*s] | Height [mAU] | Area %  |
|----------|---------------|------|-------------|--------------|--------------|---------|
| 1        | 9.302         | VB   | 0.2321      | 1.91029e4    | 1295.24731   | 49.3089 |
| 2        | 11.493        | VB   | 0.2781      | 1.96384e4    | 1101.18909   | 50.6911 |
| Totals : |               |      |             | 3.87413e4    | 2396.43640   |         |

Signal 2: DAD1 B, Sig=230,4 Ref=360,100

| Peak #   | RetTime [min] | Type | Width [min] | Area [mAU*s] | Height [mAU] | Area %  |
|----------|---------------|------|-------------|--------------|--------------|---------|
| 1        | 9.301         | VB   | 0.2187      | 2.35930e4    | 1671.41931   | 49.7826 |
| 2        | 11.493        | VB   | 0.2687      | 2.37991e4    | 1369.79346   | 50.2174 |
| Totals : |               |      |             | 4.73921e4    | 3041.21277   |         |

Signal 3: DAD1 C, Sig=254,4 Ref=360,100

| Peak #   | RetTime [min] | Type | Width [min] | Area [mAU*s] | Height [mAU] | Area %  |
|----------|---------------|------|-------------|--------------|--------------|---------|
| 1        | 9.301         | VB   | 0.2132      | 7726.67627   | 559.19073    | 50.0923 |
| 2        | 11.493        | VB   | 0.2666      | 7698.19336   | 447.75427    | 49.9077 |
| Totals : |               |      |             | 1.54249e4    | 1006.94501   |         |

Signal 4: DAD1 D, Sig=280,4 Ref=360,100

| Peak #   | RetTime [min] | Type | Width [min] | Area [mAU*s] | Height [mAU] | Area %  |
|----------|---------------|------|-------------|--------------|--------------|---------|
| 1        | 9.301         | VB   | 0.2130      | 9714.44727   | 703.87689    | 50.2187 |
| 2        | 11.493        | VB   | 0.2658      | 9629.84570   | 562.32385    | 49.7813 |
| Totals : |               |      |             | 1.93443e4    | 1266.20074   |         |

Signal 5: DAD1 E, Sig=310,4 Ref=360,100

\*\*\* End of Report \*\*\*

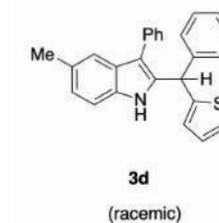



Data File C:\CHEM32\1\DATA\SUN\_12 2021-07-07 09-44-30\YQL-1-155-BCC.D  
 Sample Name:

```
=====
Acq. Operator   :                               Seq. Line :   40
Acq. Instrument : Instrument 1                   Location  : Vial 62
Injection Date  : 7/7/2021 11:18:50 PM          Inj       :    1
                                                    Inj Volume: 5.000 µl
Acq. Method    : C:\CHEM32\1\DATA\SUN_12 2021-07-07 09-44-30\AD-03-20.M
Last changed   : 7/2/2016 3:26:02 PM
Analysis Method : C:\CHEM32\1\METHODS\IC-07-60-0.5ML.M
Last changed   : 8/27/2021 10:36:01 AM
                (modified after loading)
```

Additional Info : Peak(s) manually integrated

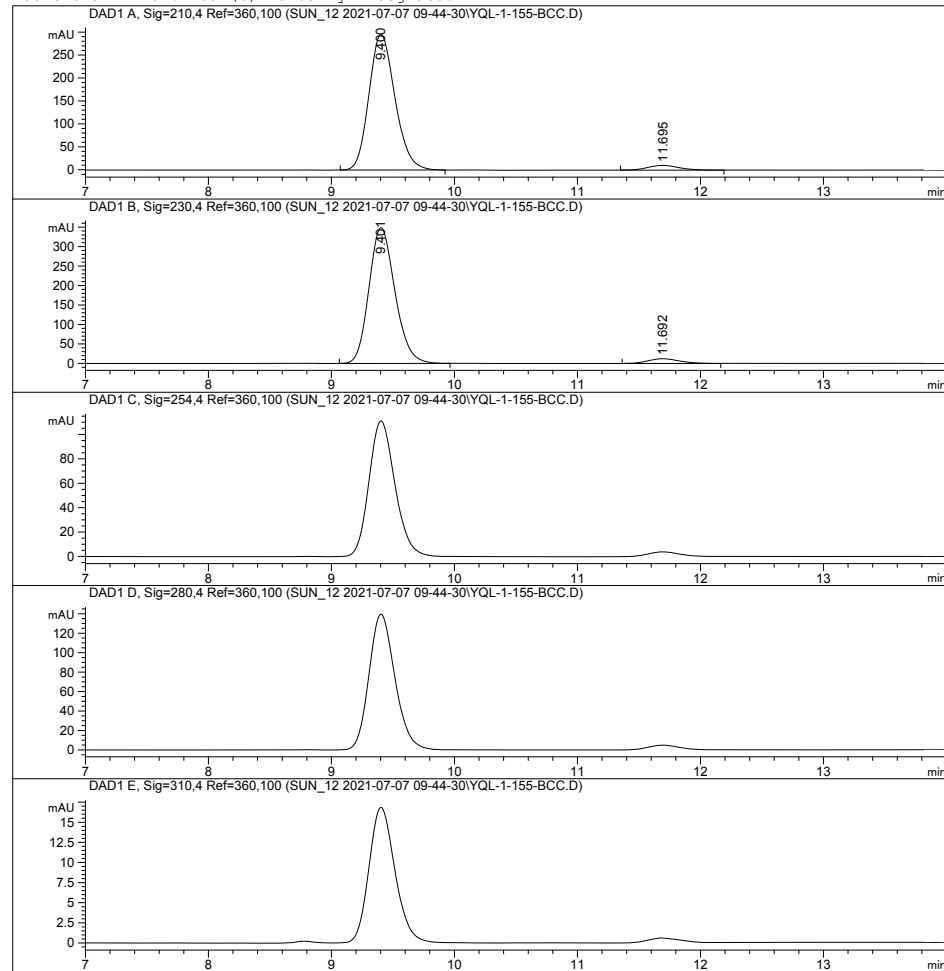

Data File C:\CHEM32\1\DATA\SUN\_12 2021-07-07 09-44-30\YQL-1-155-BCC.D  
 Sample Name:

Area Percent Report

```
Sorted By      :      Signal
Multiplier     :      1.0000
Dilution       :      1.0000
Use Multiplier & Dilution Factor with ISTDs
```

Signal 1: DAD1 A, Sig=210,4 Ref=360,100

| Peak # | RetTime [min] | Type | Width [min] | Area [mAU*s] | Height [mAU] | Area %  |
|--------|---------------|------|-------------|--------------|--------------|---------|
| 1      | 9.400         | BB   | 0.2275      | 4346.56299   | 295.60614    | 95.9380 |
| 2      | 11.695        | BB   | 0.2624      | 184.03313    | 10.40223     | 4.0620  |

Totals : 4530.59612 306.00837

Signal 2: DAD1 B, Sig=230,4 Ref=360,100

| Peak # | RetTime [min] | Type | Width [min] | Area [mAU*s] | Height [mAU] | Area %  |
|--------|---------------|------|-------------|--------------|--------------|---------|
| 1      | 9.401         | BB   | 0.2270      | 5111.56934   | 348.71329    | 95.9421 |
| 2      | 11.692        | BB   | 0.2715      | 216.19398    | 12.15722     | 4.0579  |

Totals : 5327.76332 360.87051

Signal 3: DAD1 C, Sig=254,4 Ref=360,100

Signal 4: DAD1 D, Sig=280,4 Ref=360,100

Signal 5: DAD1 E, Sig=310,4 Ref=360,100

\*\*\* End of Report \*\*\*

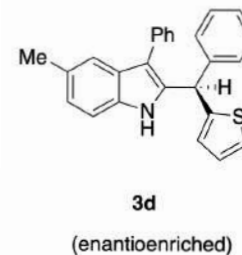

```

=====
Acq. Operator   :                               Seq. Line :   31
Acq. Instrument : Instrument 1                   Location  : Vial 53
Injection Date  : 7/17/2021 5:24:22 AM          Inj       :    1
                                           Inj Volume: 5.000 µl
Different Inj Volume from Sequence ! Actual Inj Volume : 8.000 µl
Acq. Method    : C:\CHEM32\1\DATA\SUN_12 2021-07-16 18-23-29\OD-02-40-0.5.M
Last changed   : 7/14/2021 9:24:08 AM
Analysis Method: C:\CHEM32\1\METHODS\IC-07-60-0.5ML.M
Last changed   : 8/21/2021 2:07:02 PM
                (modified after loading)
Additional Info : Peak(s) manually integrated
  
```

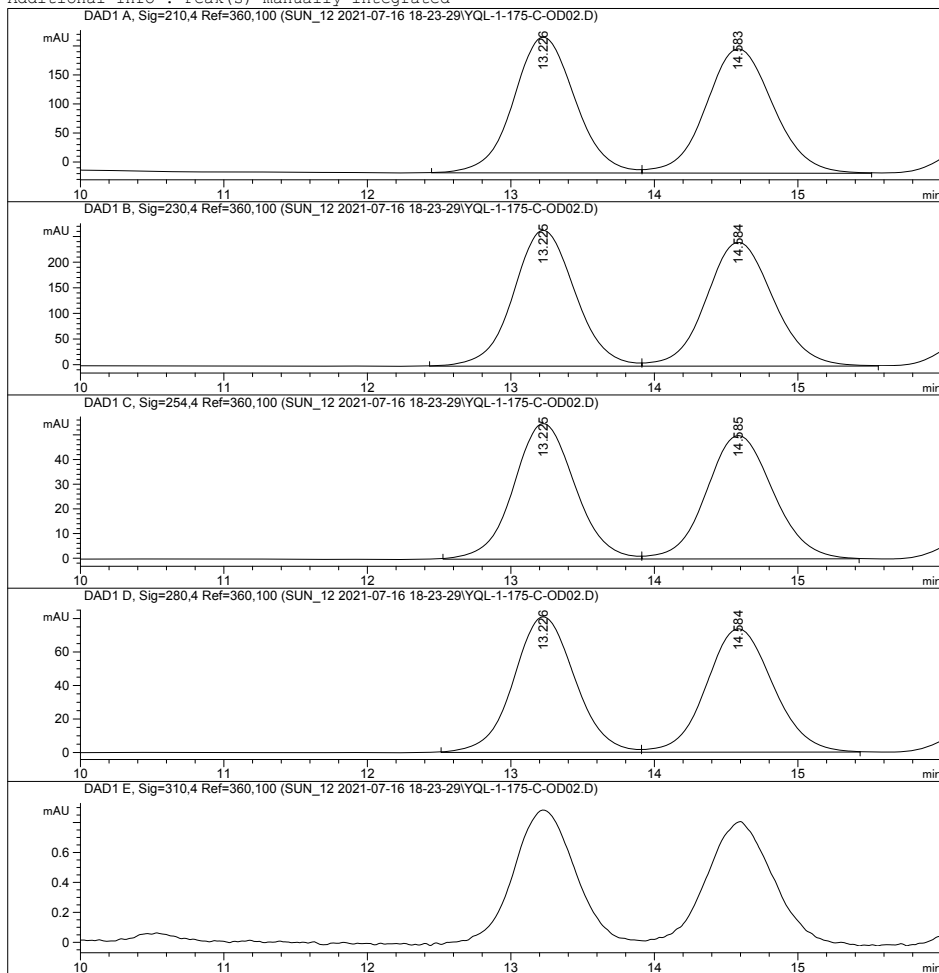

```

=====
                          Area Percent Report
=====
Sorted By      :      Signal
Multiplier    :      1.0000
Dilution      :      1.0000
Use Multiplier & Dilution Factor with ISTDs
  
```

Signal 1: DAD1 A, Sig=210,4 Ref=360,100

| Peak #   | RetTime [min] | Type | Width [min] | Area [mAU*s] | Height [mAU] | Area %  |
|----------|---------------|------|-------------|--------------|--------------|---------|
| 1        | 13.226        | BV   | 0.4665      | 6990.55762   | 234.03725    | 49.9823 |
| 2        | 14.583        | VB   | 0.5069      | 6995.49854   | 214.28387    | 50.0177 |
| Totals : |               |      |             | 1.39861e4    | 448.32112    |         |

Signal 2: DAD1 B, Sig=230,4 Ref=360,100

| Peak #   | RetTime [min] | Type | Width [min] | Area [mAU*s] | Height [mAU] | Area %  |
|----------|---------------|------|-------------|--------------|--------------|---------|
| 1        | 13.225        | BV   | 0.4648      | 7916.18555   | 264.80038    | 50.1033 |
| 2        | 14.584        | VB   | 0.5087      | 7883.55859   | 241.60342    | 49.8967 |
| Totals : |               |      |             | 1.57997e4    | 506.40381    |         |

Signal 3: DAD1 C, Sig=254,4 Ref=360,100

| Peak #   | RetTime [min] | Type | Width [min] | Area [mAU*s] | Height [mAU] | Area %  |
|----------|---------------|------|-------------|--------------|--------------|---------|
| 1        | 13.225        | BV   | 0.4629      | 1633.32446   | 54.93291     | 50.1670 |
| 2        | 14.585        | VB   | 0.5022      | 1622.45325   | 50.05202     | 49.8330 |
| Totals : |               |      |             | 3255.77771   | 104.98492    |         |

Signal 4: DAD1 D, Sig=280,4 Ref=360,100

| Peak #   | RetTime [min] | Type | Width [min] | Area [mAU*s] | Height [mAU] | Area %  |
|----------|---------------|------|-------------|--------------|--------------|---------|
| 1        | 13.226        | BV   | 0.4627      | 2404.30981   | 80.89833     | 50.2340 |
| 2        | 14.584        | VB   | 0.5033      | 2381.90845   | 73.64767     | 49.7660 |
| Totals : |               |      |             | 4786.21826   | 154.54600    |         |

Signal 5: DAD1 E, Sig=310,4 Ref=360,100

\*\*\* End of Report \*\*\*

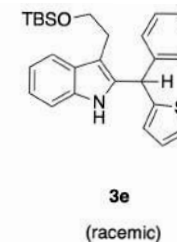

Sample Name:

```

=====
Acq. Operator   :                               Seq. Line : 11
Acq. Instrument : Instrument 1                   Location  : Vial 63
Injection Date  : 8/16/2021 11:43:34 AM        Inj       : 1
                                           Inj Volume: 5.000 µl
Different Inj Volume from Sequence ! Actual Inj Volume : 7.000 µl
Acq. Method    : C:\CHEM32\1\DATA\SUN_12 2021-08-16 09-26-58\OD-02-40-0.5.M
Last changed   : 7/14/2021 9:24:08 AM
Analysis Method : C:\CHEM32\1\METHODS\IC-07-60-0.5ML.M
Last changed   : 8/27/2021 11:00:21 AM
                (modified after loading)
  
```

Additional Info : Peak(s) manually integrated

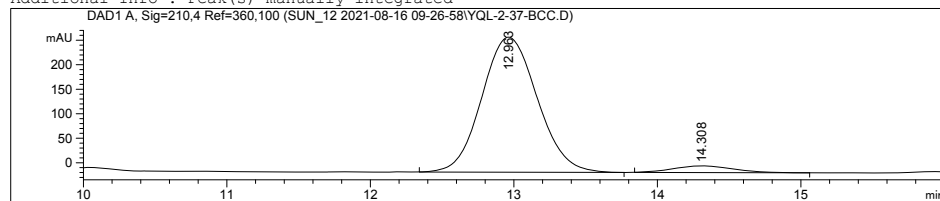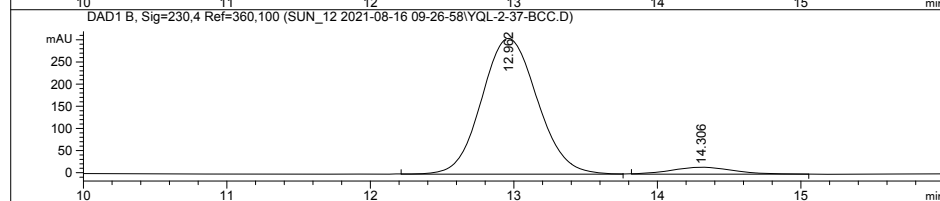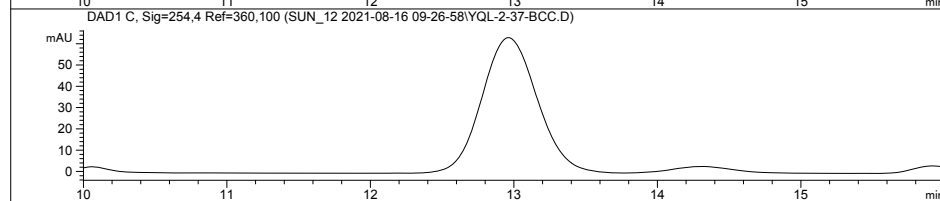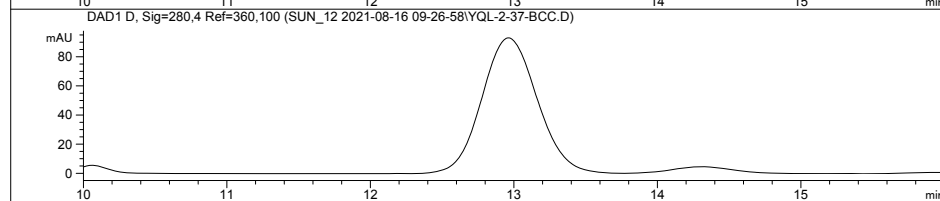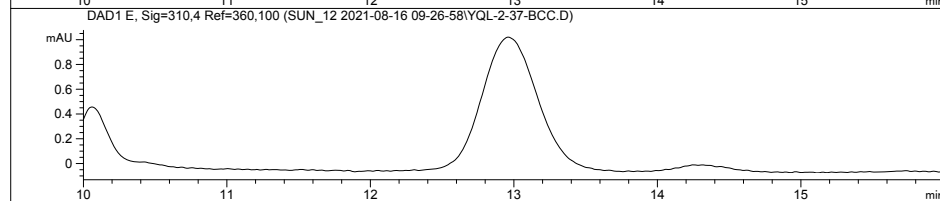

Sample Name:

## Area Percent Report

```

=====
Sorted By      :      Signal
Multiplier     :      1.0000
Dilution       :      1.0000
Use Multiplier & Dilution Factor with ISTDs
  
```

Signal 1: DAD1 A, Sig=210,4 Ref=360,100

| Peak # | RetTime [min] | Type | Width [min] | Area [mAU*s] | Height [mAU] | Area %  |
|--------|---------------|------|-------------|--------------|--------------|---------|
| 1      | 12.963        | BB   | 0.4209      | 7394.72754   | 275.67648    | 94.8736 |
| 2      | 14.308        | BB   | 0.4312      | 399.57043    | 13.74294     | 5.1264  |

Totals : 7794.29797 289.41942

Signal 2: DAD1 B, Sig=230,4 Ref=360,100

| Peak # | RetTime [min] | Type | Width [min] | Area [mAU*s] | Height [mAU] | Area %  |
|--------|---------------|------|-------------|--------------|--------------|---------|
| 1      | 12.962        | BB   | 0.4229      | 8273.05273   | 306.50214    | 94.7027 |
| 2      | 14.306        | BB   | 0.4417      | 462.76218    | 15.61651     | 5.2973  |

Totals : 8735.81491 322.11865

Signal 3: DAD1 C, Sig=254,4 Ref=360,100

Signal 4: DAD1 D, Sig=280,4 Ref=360,100

Signal 5: DAD1 E, Sig=310,4 Ref=360,100

\*\*\* End of Report \*\*\*

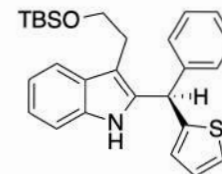

**3e**  
(enantioenriched)

Sample Name:

```

=====
Acq. Operator   :                               Seq. Line :   10
Acq. Instrument : Instrument 1                   Location  : Vial 51
Injection Date  : 6/4/2021 1:06:27 PM           Inj       :    1
                                                Inj Volume: 5.000 µl
Different Inj Volume from Sequence ! Actual Inj Volume: 3.000 µl
Acq. Method    : C:\CHEM32\1\DATA\SUN_12 2021-06-04 10-15-26\AD-03-30.M
Last changed   : 6/4/2021 1:05:36 PM
                (modified after loading)
Analysis Method: C:\CHEM32\1\METHODS\AS-20-60-0.5.M
Last changed   : 8/9/2021 10:31:08 PM
                (modified after loading)
Additional Info : Peak(s) manually integrated
    
```

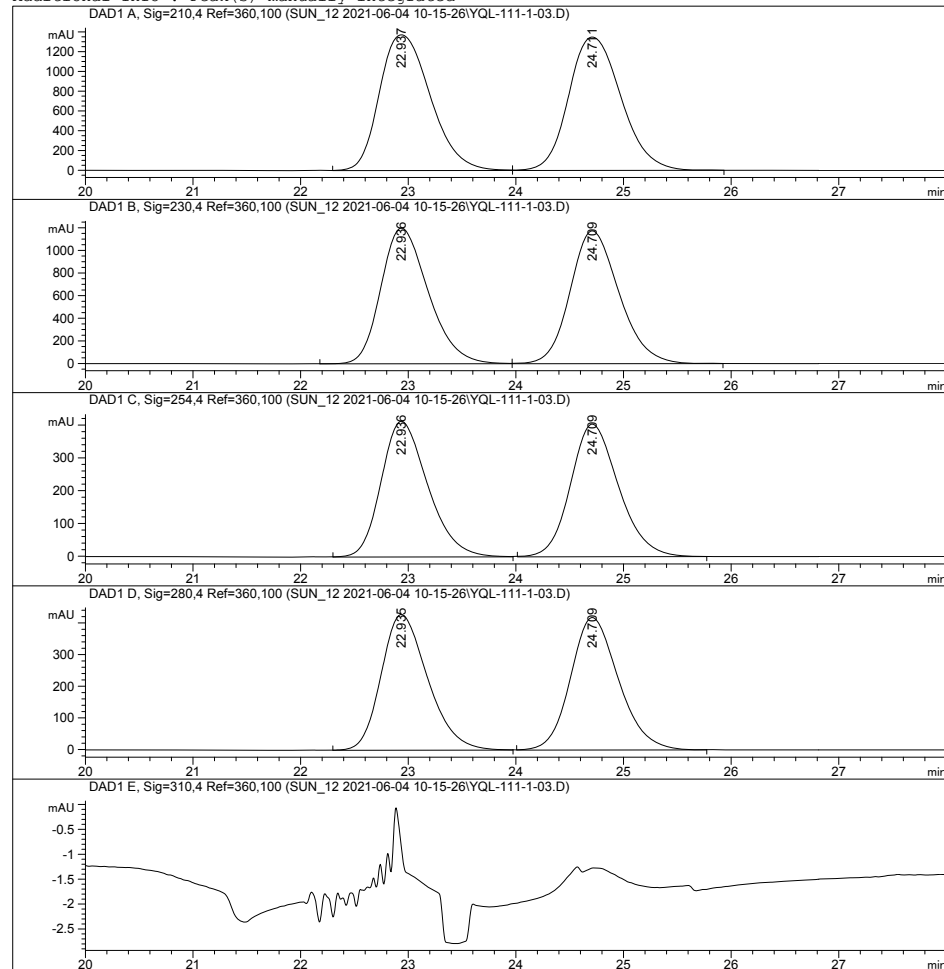

Sample Name:

```

=====
                          Area Percent Report
=====
Sorted By      :      Signal
Multiplier    :      1.0000
Dilution      :      1.0000
Use Multiplier & Dilution Factor with ISTDs
    
```

Signal 1: DAD1 A, Sig=210,4 Ref=360,100

| Peak #   | RetTime [min] | Type | Width [min] | Area [mAU*s] | Height [mAU] | Area %  |
|----------|---------------|------|-------------|--------------|--------------|---------|
| 1        | 22.937        | VV   | 0.5148      | 4.50575e4    | 1373.16296   | 49.6864 |
| 2        | 24.711        | VB   | 0.5349      | 4.56263e4    | 1347.91992   | 50.3136 |
| Totals : |               |      |             | 9.06838e4    | 2721.08289   |         |

Signal 2: DAD1 B, Sig=230,4 Ref=360,100

| Peak #   | RetTime [min] | Type | Width [min] | Area [mAU*s] | Height [mAU] | Area %  |
|----------|---------------|------|-------------|--------------|--------------|---------|
| 1        | 22.936        | VV   | 0.4750      | 3.67318e4    | 1200.29749   | 49.7432 |
| 2        | 24.709        | VB   | 0.4888      | 3.71111e4    | 1173.88464   | 50.2568 |
| Totals : |               |      |             | 7.38429e4    | 2374.18213   |         |

Signal 3: DAD1 C, Sig=254,4 Ref=360,100

| Peak #   | RetTime [min] | Type | Width [min] | Area [mAU*s] | Height [mAU] | Area %  |
|----------|---------------|------|-------------|--------------|--------------|---------|
| 1        | 22.936        | VB   | 0.4672      | 1.24562e4    | 413.83664    | 49.7823 |
| 2        | 24.709        | BB   | 0.4766      | 1.25651e4    | 404.31332    | 50.2177 |
| Totals : |               |      |             | 2.50213e4    | 818.14996    |         |

Signal 4: DAD1 D, Sig=280,4 Ref=360,100

| Peak #   | RetTime [min] | Type | Width [min] | Area [mAU*s] | Height [mAU] | Area %  |
|----------|---------------|------|-------------|--------------|--------------|---------|
| 1        | 22.935        | VB   | 0.4667      | 1.28895e4    | 428.77884    | 49.7751 |
| 2        | 24.709        | BB   | 0.4765      | 1.30060e4    | 418.53918    | 50.2249 |
| Totals : |               |      |             | 2.58954e4    | 847.31802    |         |

Signal 5: DAD1 E, Sig=310,4 Ref=360,100

\*\*\* End of Report \*\*\*

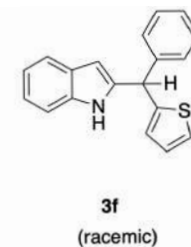

Sample Name:

```

=====
Acq. Operator   :                               Seq. Line :    5
Acq. Instrument : Instrument 1                  Location  : Vial 61
Injection Date  : 7/7/2021 10:42:26 AM        Inj       :    1
                                                Inj Volume: 5.000 µl
Acq. Method    : C:\CHEM32\1\DATA\SUN_12 2021-07-07 09-44-30\AD-03-30.M
Last changed   : 7/7/2021 10:41:33 AM
                (modified after loading)
Analysis Method : C:\CHEM32\1\METHODS\IC-07-60-0.5ML.M
Last changed   : 8/27/2021 10:37:37 AM
                (modified after loading)
Additional Info : Peak(s) manually integrated
    
```

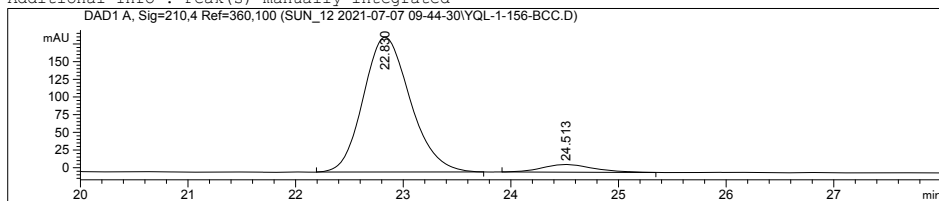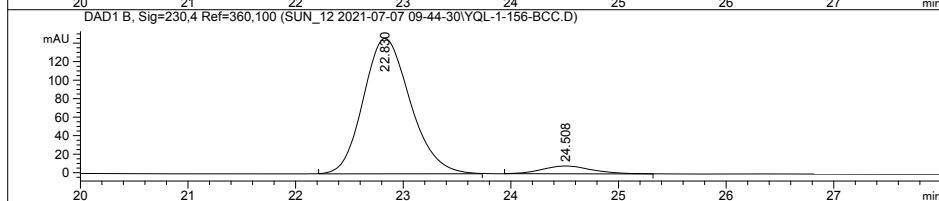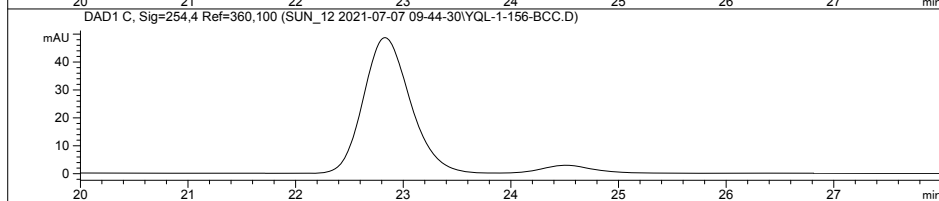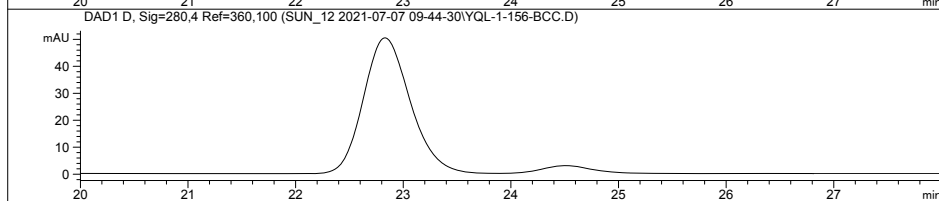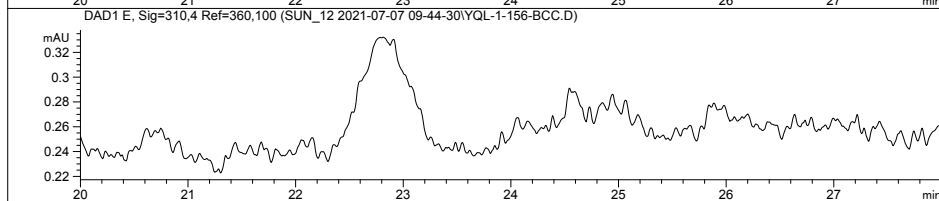

Sample Name:

```

=====
                        Area Percent Report
=====
Sorted By       :      Signal
Multiplier      :      1.0000
Dilution        :      1.0000
Use Multiplier & Dilution Factor with ISTDs
    
```

Signal 1: DAD1 A, Sig=210,4 Ref=360,100

| Peak # | RetTime [min] | Type | Width [min] | Area [mAU*s] | Height [mAU] | Area %  |
|--------|---------------|------|-------------|--------------|--------------|---------|
| 1      | 22.830        | BB   | 0.4632      | 5776.67627   | 190.82646    | 94.1092 |
| 2      | 24.513        | BB   | 0.4089      | 361.59180    | 10.90215     | 5.8908  |

Totals : 6138.26807 201.72861

Signal 2: DAD1 B, Sig=230,4 Ref=360,100

| Peak # | RetTime [min] | Type | Width [min] | Area [mAU*s] | Height [mAU] | Area %  |
|--------|---------------|------|-------------|--------------|--------------|---------|
| 1      | 22.830        | BB   | 0.4667      | 4425.43994   | 146.38750    | 94.2613 |
| 2      | 24.508        | BB   | 0.4657      | 269.42255    | 8.45734      | 5.7387  |

Totals : 4694.86249 154.84484

Signal 3: DAD1 C, Sig=254,4 Ref=360,100

Signal 4: DAD1 D, Sig=280,4 Ref=360,100

Signal 5: DAD1 E, Sig=310,4 Ref=360,100

\*\*\* End of Report \*\*\*

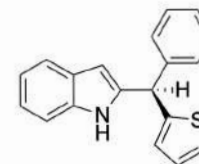

**3f**  
(enantioenriched)

Sample Name:

```

=====
Acq. Operator   :                               Seq. Line :   17
Acq. Instrument : Instrument 1                   Location  : Vial 58
Injection Date  : 6/4/2021 4:44:55 PM           Inj       :    1
                                                Inj Volume: 5.000 µl
Different Inj Volume from Sequence ! Actual Inj Volume : 3.000 µl
Acq. Method    : C:\CHEM32\1\DATA\SUN_12 2021-06-04 10-15-26\AD-03-30.M
Last changed   : 6/4/2021 1:05:36 PM
                                                (modified after loading)
Analysis Method : C:\CHEM32\1\METHODS\IC-07-60-0.5ML.M
Last changed   : 8/27/2021 3:59:31 PM
                                                (modified after loading)
Additional Info : Peak(s) manually integrated
    
```

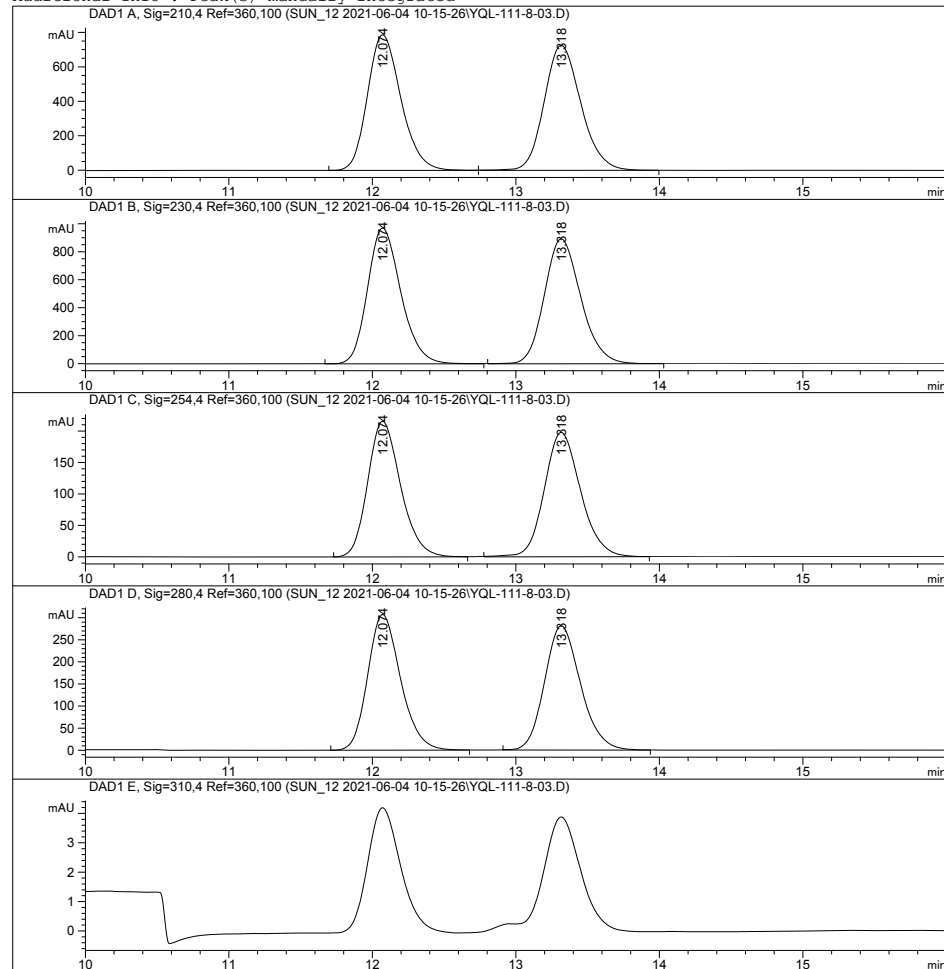

Sample Name:

```

=====
                          Area Percent Report
=====
Sorted By      :      Signal
Multiplier    :      1.0000
Dilution      :      1.0000
Use Multiplier & Dilution Factor with ISTDs
    
```

Signal 1: DAD1 A, Sig=210,4 Ref=360,100

| Peak #   | RetTime [min] | Type | Width [min] | Area [mAU*s] | Height [mAU] | Area %  |
|----------|---------------|------|-------------|--------------|--------------|---------|
| 1        | 12.074        | BV   | 0.2510      | 1.27555e4    | 787.55853    | 49.6683 |
| 2        | 13.318        | VB   | 0.2736      | 1.29259e4    | 726.42029    | 50.3317 |
| Totals : |               |      |             | 2.56814e4    | 1513.97882   |         |

Signal 2: DAD1 B, Sig=230,4 Ref=360,100

| Peak #   | RetTime [min] | Type | Width [min] | Area [mAU*s] | Height [mAU] | Area %  |
|----------|---------------|------|-------------|--------------|--------------|---------|
| 1        | 12.074        | BB   | 0.2479      | 1.56325e4    | 970.68988    | 49.8004 |
| 2        | 13.318        | BB   | 0.2719      | 1.57578e4    | 893.00250    | 50.1996 |
| Totals : |               |      |             | 3.13902e4    | 1863.69238   |         |

Signal 3: DAD1 C, Sig=254,4 Ref=360,100

| Peak #   | RetTime [min] | Type | Width [min] | Area [mAU*s] | Height [mAU] | Area %  |
|----------|---------------|------|-------------|--------------|--------------|---------|
| 1        | 12.074        | BB   | 0.2457      | 3432.69995   | 215.64636    | 49.6389 |
| 2        | 13.318        | BB   | 0.2715      | 3482.63989   | 197.73688    | 50.3611 |
| Totals : |               |      |             | 6915.33984   | 413.38324    |         |

Signal 4: DAD1 D, Sig=280,4 Ref=360,100

| Peak #   | RetTime [min] | Type | Width [min] | Area [mAU*s] | Height [mAU] | Area %  |
|----------|---------------|------|-------------|--------------|--------------|---------|
| 1        | 12.074        | BB   | 0.2453      | 4877.90283   | 307.04034    | 49.8985 |
| 2        | 13.318        | BB   | 0.2691      | 4897.74219   | 281.27936    | 50.1015 |
| Totals : |               |      |             | 9775.64502   | 588.31970    |         |

Signal 5: DAD1 E, Sig=310,4 Ref=360,100

\*\*\* End of Report \*\*\*

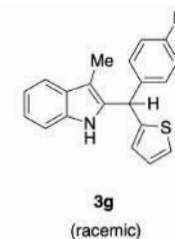

```
=====
Acq. Operator   :                               Seq. Line : 22
Acq. Instrument : Instrument 1                   Location  : Vial 62
Injection Date  : 7/25/2021 12:41:44 AM        Inj       : 1
                                           Inj Volume: 5.000 µl
Acq. Method    : C:\CHEM32\1\DATA\SUN_12 2021-07-24 15-45-25\AD-03-20.M
Last changed   : 7/2/2016 3:26:02 PM
Analysis Method : C:\CHEM32\1\METHODS\IC-07-60-0.5ML.M
Last changed   : 8/27/2021 10:47:33 AM
                (modified after loading)
Additional Info : Peak(s) manually integrated
```

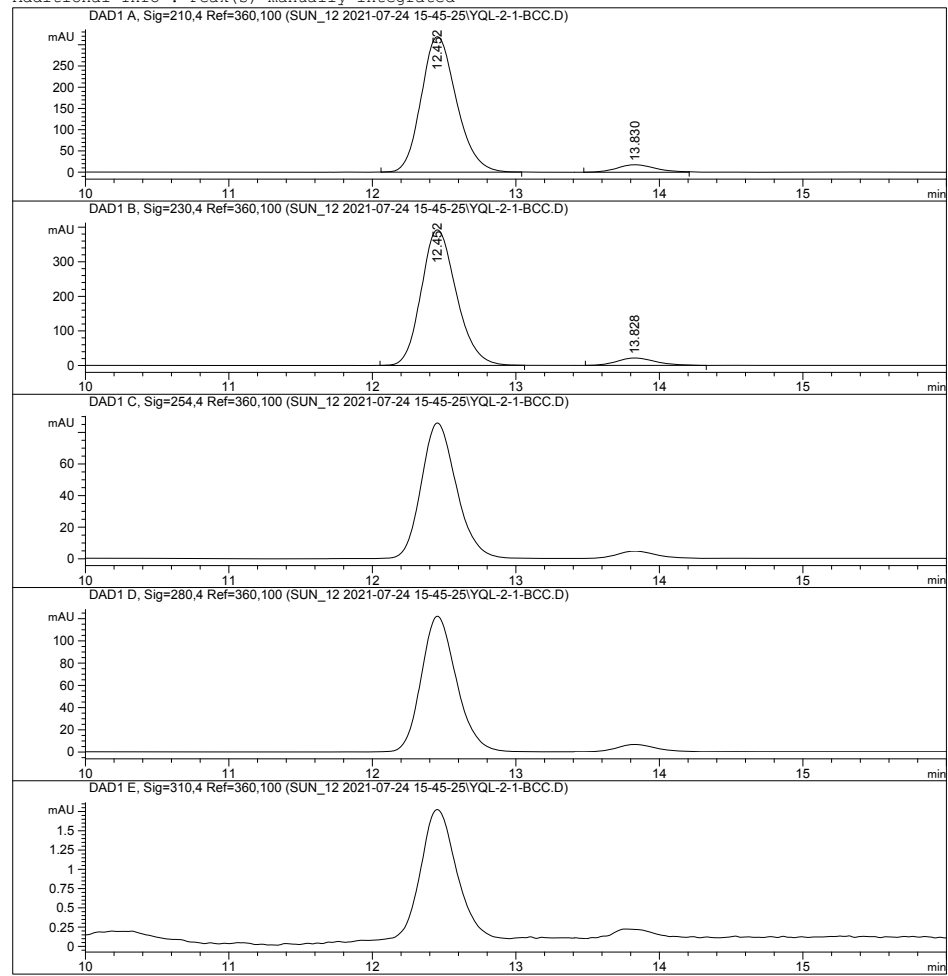

```
=====
                          Area Percent Report
=====
Sorted By      :      Signal
Multiplier    :      1.0000
Dilution      :      1.0000
Use Multiplier & Dilution Factor with ISTDs
```

Signal 1: DAD1 A, Sig=210,4 Ref=360,100

| Peak # | RetTime [min] | Type | Width [min] | Area [mAU*s] | Height [mAU] | Area %  |
|--------|---------------|------|-------------|--------------|--------------|---------|
| 1      | 12.452        | BB   | 0.2625      | 5436.47119   | 319.52325    | 94.3130 |
| 2      | 13.830        | BV   | 0.2811      | 327.81601    | 17.77982     | 5.6870  |

Totals : 5764.28720 337.30308

Signal 2: DAD1 B, Sig=230,4 Ref=360,100

| Peak # | RetTime [min] | Type | Width [min] | Area [mAU*s] | Height [mAU] | Area %  |
|--------|---------------|------|-------------|--------------|--------------|---------|
| 1      | 12.452        | BB   | 0.2623      | 6670.25586   | 392.36011    | 94.3855 |
| 2      | 13.828        | BB   | 0.2852      | 396.77756    | 21.51443     | 5.6145  |

Totals : 7067.03342 413.87454

Signal 3: DAD1 C, Sig=254,4 Ref=360,100

Signal 4: DAD1 D, Sig=280,4 Ref=360,100

Signal 5: DAD1 E, Sig=310,4 Ref=360,100

\*\*\* End of Report \*\*\*

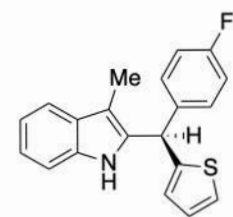

**3g**  
(enantioenriched)

Sample Name:

```

=====
Acq. Operator   :                               Seq. Line :    3
Acq. Instrument : Instrument 1                   Location  : Vial 62
Injection Date  : 8/1/2021 3:51:05 PM           Inj       :    1
                                           Inj Volume: 5.000 µl
Different Inj Volume from Sequence ! Actual Inj Volume : 6.000 µl
Acq. Method    : C:\CHEM32\1\DATA\SUN_12 2021-08-01 15-22-26\AD-05-15.M
Last changed   : 8/1/2021 3:33:50 PM
                                           (modified after loading)
Analysis Method : C:\CHEM32\1\METHODS\IC-07-60-0.5ML.M
Last changed   : 8/27/2021 4:04:23 PM
                                           (modified after loading)
Additional Info : Peak(s) manually integrated

```

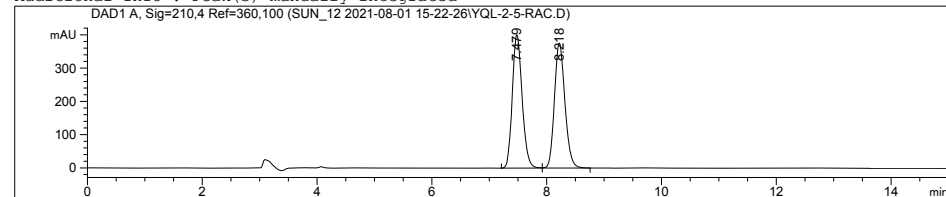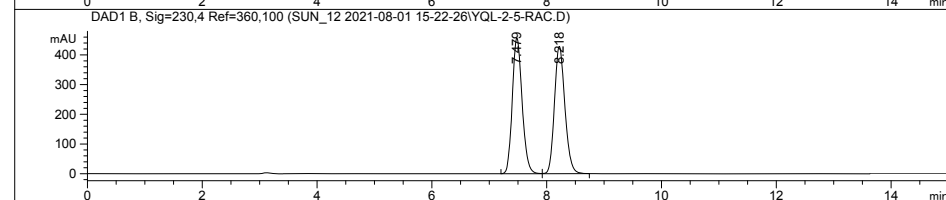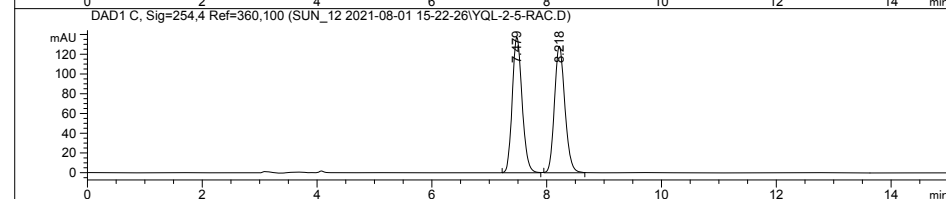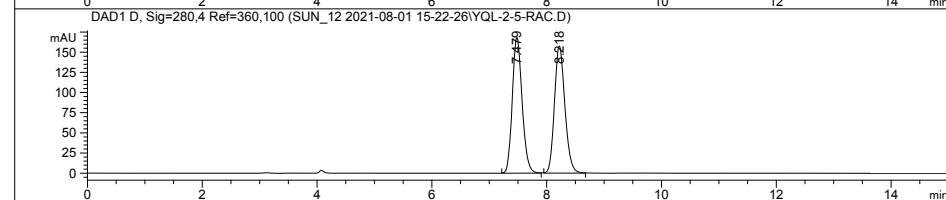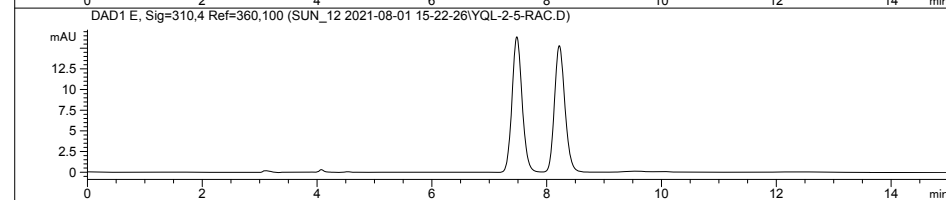

Sample Name:

```

=====
                          Area Percent Report
=====
Sorted By      :      Signal
Multiplier    :      1.0000
Dilution      :      1.0000
Use Multiplier & Dilution Factor with ISTDs

```

Signal 1: DAD1 A, Sig=210,4 Ref=360,100

| Peak # | RetTime [min] | Type | Width [min] | Area [mAU*s] | Height [mAU] | Area %  |
|--------|---------------|------|-------------|--------------|--------------|---------|
| 1      | 7.479         | BV   | 0.1849      | 4769.45459   | 400.68921    | 50.0452 |
| 2      | 8.218         | VB   | 0.1978      | 4760.84424   | 375.85959    | 49.9548 |

Totals : 9530.29883 776.54880

Signal 2: DAD1 B, Sig=230,4 Ref=360,100

| Peak # | RetTime [min] | Type | Width [min] | Area [mAU*s] | Height [mAU] | Area %  |
|--------|---------------|------|-------------|--------------|--------------|---------|
| 1      | 7.479         | BV   | 0.1847      | 5432.73389   | 456.98373    | 50.0353 |
| 2      | 8.218         | VB   | 0.1976      | 5425.07910   | 428.92029    | 49.9647 |

Totals : 1.08578e4 885.90402

Signal 3: DAD1 C, Sig=254,4 Ref=360,100

| Peak # | RetTime [min] | Type | Width [min] | Area [mAU*s] | Height [mAU] | Area %  |
|--------|---------------|------|-------------|--------------|--------------|---------|
| 1      | 7.479         | BB   | 0.1849      | 1633.47925   | 137.17763    | 50.2564 |
| 2      | 8.218         | BB   | 0.1973      | 1616.80884   | 128.06210    | 49.7436 |

Totals : 3250.28809 265.23973

Signal 4: DAD1 D, Sig=280,4 Ref=360,100

| Peak # | RetTime [min] | Type | Width [min] | Area [mAU*s] | Height [mAU] | Area %  |
|--------|---------------|------|-------------|--------------|--------------|---------|
| 1      | 7.479         | BB   | 0.1845      | 1996.62109   | 168.17789    | 50.0971 |
| 2      | 8.218         | BB   | 0.1972      | 1988.87903   | 157.65567    | 49.9029 |

Totals : 3985.50012 325.83356

Signal 5: DAD1 E, Sig=310,4 Ref=360,100

\*\*\* End of Report \*\*\*

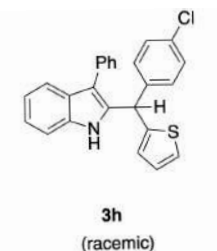



Sample Name:

```

=====
Acq. Operator   :                               Seq. Line :    2
Acq. Instrument : Instrument 1                   Location  : Vial 61
Injection Date  : 8/1/2021 3:34:41 PM           Inj       :    1
                                                Inj Volume: 5.000 µl
Different Inj Volume from Sequence ! Actual Inj Volume : 2.000 µl
Acq. Method    : C:\CHEM32\1\DATA\SUN_12 2021-08-01 15-22-26\AD-05-15.M
Last changed   : 8/1/2021 3:33:50 PM
                (modified after loading)
Analysis Method : C:\CHEM32\1\METHODS\IC-07-60-0.5ML.M
Last changed   : 8/27/2021 10:53:10 AM
                (modified after loading)
Additional Info : Peak(s) manually integrated

```

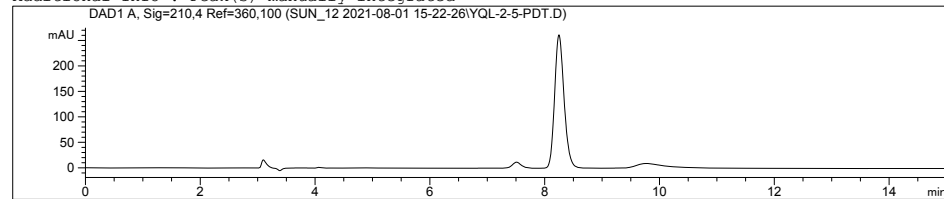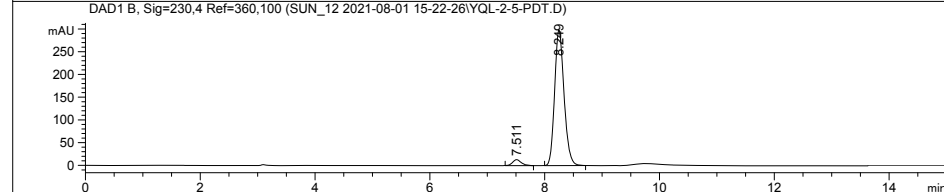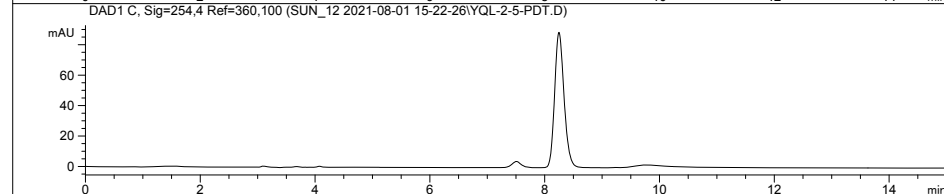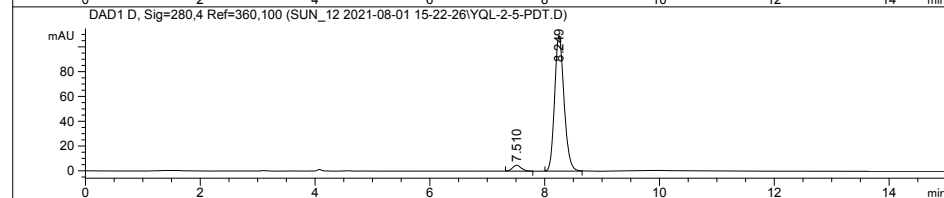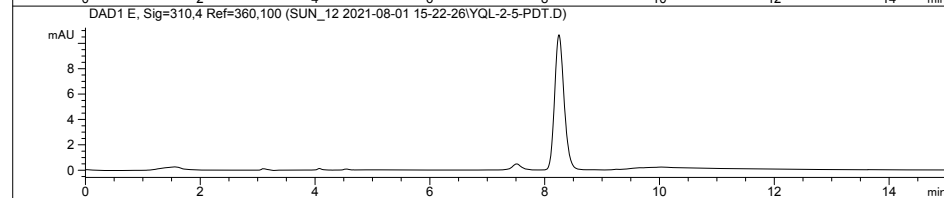

Sample Name:

```

=====
                          Area Percent Report
=====
Sorted By      :      Signal
Multiplier    :      1.0000
Dilution      :      1.0000
Use Multiplier & Dilution Factor with ISTDs

```

Signal 1: DAD1 A, Sig=210,4 Ref=360,100

Signal 2: DAD1 B, Sig=230,4 Ref=360,100

| Peak # | RetTime [min] | Type | Width [min] | Area [mAU*s] | Height [mAU] | Area %  |
|--------|---------------|------|-------------|--------------|--------------|---------|
| 1      | 7.511         | BB   | 0.1603      | 137.50772    | 13.11988     | 3.8821  |
| 2      | 8.249         | BB   | 0.1751      | 3404.54810   | 298.36481    | 96.1179 |

Totals : 3542.05582 311.48468

Signal 3: DAD1 C, Sig=254,4 Ref=360,100

Signal 4: DAD1 D, Sig=280,4 Ref=360,100

| Peak # | RetTime [min] | Type | Width [min] | Area [mAU*s] | Height [mAU] | Area %  |
|--------|---------------|------|-------------|--------------|--------------|---------|
| 1      | 7.510         | BB   | 0.1613      | 50.85761     | 4.81265      | 3.9190  |
| 2      | 8.249         | BB   | 0.1749      | 1246.85681   | 109.47958    | 96.0810 |

Totals : 1297.71442 114.29224

Signal 5: DAD1 E, Sig=310,4 Ref=360,100

\*\*\* End of Report \*\*\*

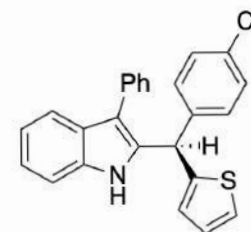

**3h**  
(enantioenriched)

```

=====
Acq. Operator   :                               Seq. Line :    5
Acq. Instrument : Instrument 1                   Location  : Vial 56
Injection Date  : 6/4/2021 9:51:53 PM          Inj       :    1
                                                Inj Volume: 5.000 µl
Different Inj Volume from Sequence ! Actual Inj Volume : 3.000 µl
Acq. Method    : C:\CHEM32\1\DATA\SUN_12 2021-06-04 20-46-05\OD-03-30.M
Last changed   : 6/4/2021 9:51:03 PM
                (modified after loading)
Analysis Method : C:\CHEM32\1\METHODS\IC-07-60-0.5ML.M
Last changed   : 8/27/2021 3:58:15 PM
                (modified after loading)
Additional Info : Peak(s) manually integrated
  
```

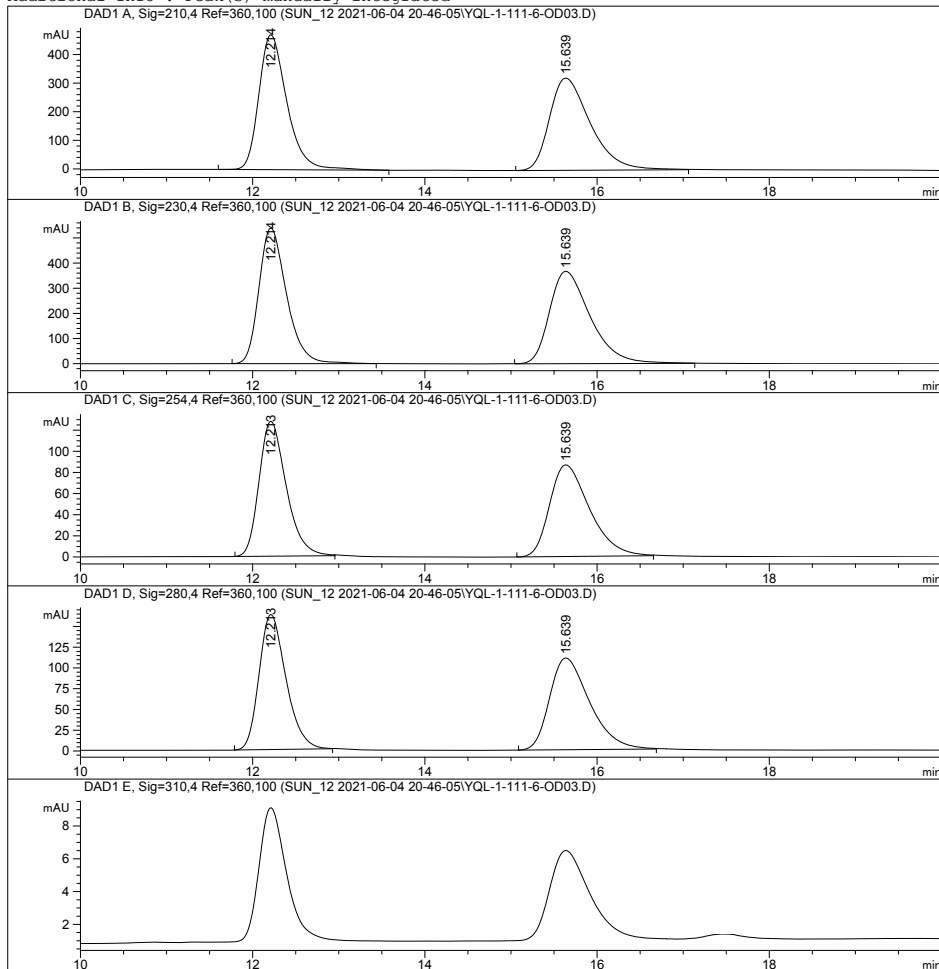

```

=====
                          Area Percent Report
=====
Sorted By      :      Signal
Multiplier    :      1.0000
Dilution      :      1.0000
Use Multiplier & Dilution Factor with ISTDs
  
```

Signal 1: DAD1 A, Sig=210,4 Ref=360,100

| Peak #   | RetTime [min] | Type | Width [min] | Area [mAU*s] | Height [mAU] | Area %  |
|----------|---------------|------|-------------|--------------|--------------|---------|
| 1        | 12.214        | BB   | 0.3462      | 1.06843e4    | 471.83389    | 50.1255 |
| 2        | 15.639        | BB   | 0.5004      | 1.06308e4    | 322.63391    | 49.8745 |
| Totals : |               |      |             | 2.13151e4    | 794.46780    |         |

Signal 2: DAD1 B, Sig=230,4 Ref=360,100

| Peak #   | RetTime [min] | Type | Width [min] | Area [mAU*s] | Height [mAU] | Area %  |
|----------|---------------|------|-------------|--------------|--------------|---------|
| 1        | 12.214        | BB   | 0.3419      | 1.20139e4    | 539.29846    | 49.8834 |
| 2        | 15.639        | BB   | 0.5012      | 1.20701e4    | 367.46014    | 50.1166 |
| Totals : |               |      |             | 2.40840e4    | 906.75861    |         |

Signal 3: DAD1 C, Sig=254,4 Ref=360,100

| Peak #   | RetTime [min] | Type | Width [min] | Area [mAU*s] | Height [mAU] | Area %  |
|----------|---------------|------|-------------|--------------|--------------|---------|
| 1        | 12.213        | BB   | 0.3356      | 2797.30591   | 127.66143    | 50.0365 |
| 2        | 15.639        | BB   | 0.4937      | 2793.22607   | 86.72826     | 49.9635 |
| Totals : |               |      |             | 5590.53198   | 214.38969    |         |

Signal 4: DAD1 D, Sig=280,4 Ref=360,100

| Peak #   | RetTime [min] | Type | Width [min] | Area [mAU*s] | Height [mAU] | Area %  |
|----------|---------------|------|-------------|--------------|--------------|---------|
| 1        | 12.213        | BB   | 0.3331      | 3530.92358   | 162.74519    | 49.7441 |
| 2        | 15.639        | BB   | 0.4943      | 3567.25269   | 110.59557    | 50.2559 |
| Totals : |               |      |             | 7098.17627   | 273.34076    |         |

Signal 5: DAD1 E, Sig=310,4 Ref=360,100

\*\*\* End of Report \*\*\*

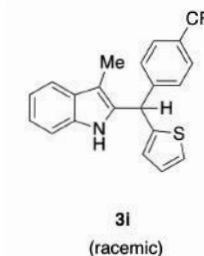

Data File C:\CHEM32\1\DATA\SUN\_12 2021-07-21 12-00-59\YQL-1-179-BCC.D  
 Sample Name:

```

=====
Acq. Operator   :                               Seq. Line :    2
Acq. Instrument : Instrument 1                   Location  : Vial 51
Injection Date  : 7/21/2021 12:14:36 PM          Inj       :    1
                                                Inj Volume: 5.000 µl
Different Inj Volume from Sequence ! Actual Inj Volume : 8.000 µl
Acq. Method    : C:\CHEM32\1\DATA\SUN_12 2021-07-21 12-00-59\OD-03-20.M
Last changed   : 7/21/2021 12:13:44 PM
                (modified after loading)
Analysis Method : C:\CHEM32\1\METHODS\IC-07-60-0.5ML.M
Last changed   : 8/27/2021 10:45:44 AM
                (modified after loading)
Additional Info : Peak(s) manually integrated
  
```

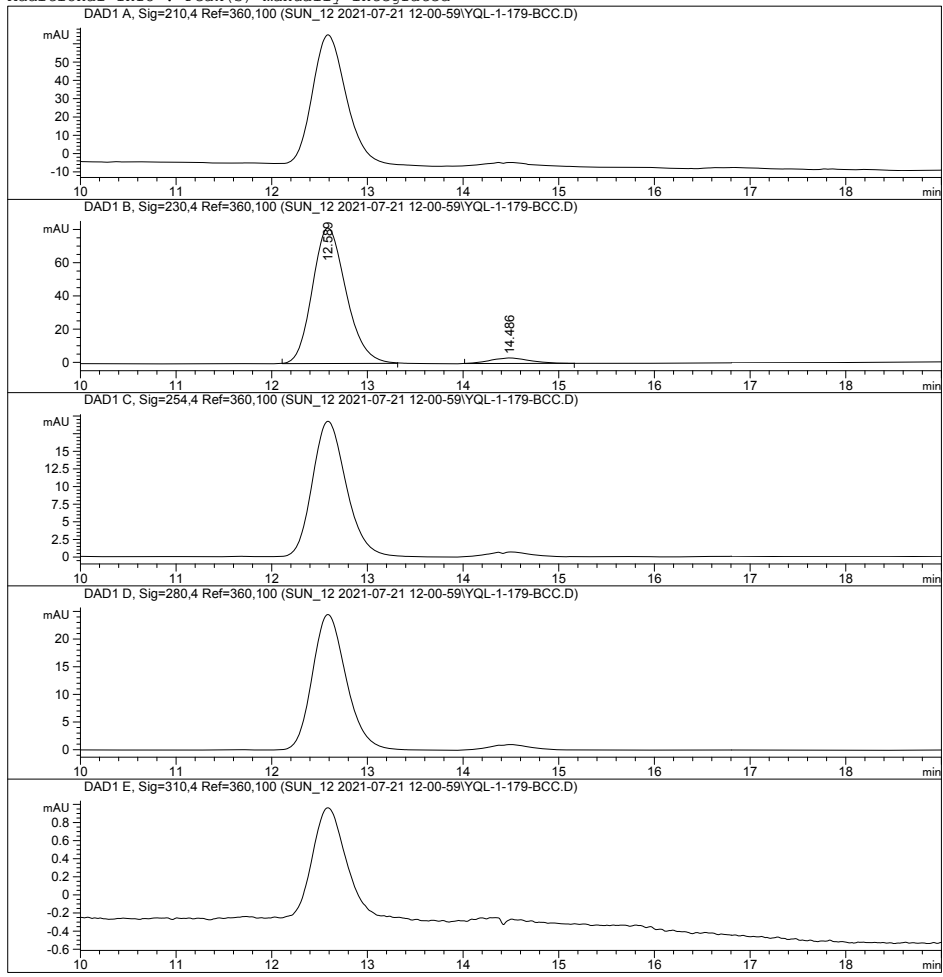

Data File C:\CHEM32\1\DATA\SUN\_12 2021-07-21 12-00-59\YQL-1-179-BCC.D  
 Sample Name:

Area Percent Report

```

Sorted By       :      Signal
Multiplier     :      1.0000
Dilution       :      1.0000
Use Multiplier & Dilution Factor with ISTDs
  
```

Signal 1: DAD1 A, Sig=210,4 Ref=360,100

Signal 2: DAD1 B, Sig=230,4 Ref=360,100

| Peak # | RetTime [min] | Type | Width [min] | Area [mAU*s] | Height [mAU] | Area %  |
|--------|---------------|------|-------------|--------------|--------------|---------|
| 1      | 12.589        | BB   | 0.3779      | 1999.08301   | 81.56667     | 95.5344 |
| 2      | 14.486        | BB   | 0.3752      | 93.44401     | 3.31168      | 4.4656  |

Totals : 2092.52702 84.87834

Signal 3: DAD1 C, Sig=254,4 Ref=360,100

Signal 4: DAD1 D, Sig=280,4 Ref=360,100

Signal 5: DAD1 E, Sig=310,4 Ref=360,100

\*\*\* End of Report \*\*\*

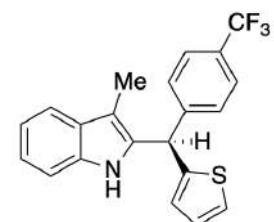

**3i**  
 (enantioenriched)

```

=====
Acq. Operator   :                               Seq. Line :    7
Acq. Instrument : Instrument 1                   Location  : Vial 52
Injection Date  : 6/15/2021 11:02:26 AM         Inj       :    1
                                           Inj Volume: 5.000 µl
Acq. Method    : C:\CHEM32\1\DATA\COLUMNWASHING 2021-06-15 09-05-32\OD-10-30.M
Last changed   : 6/15/2021 11:01:35 AM
                (modified after loading)
Analysis Method: C:\CHEM32\1\METHODS\IC-07-60-0.5ML.M
Last changed   : 8/27/2021 3:55:03 PM
                (modified after loading)
Additional Info: Peak(s) manually integrated
  
```

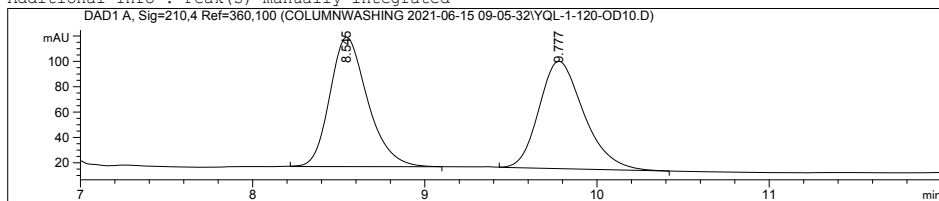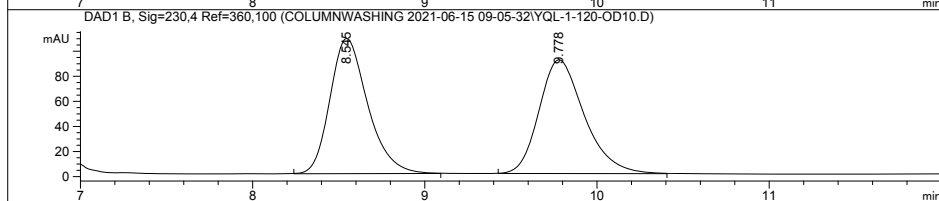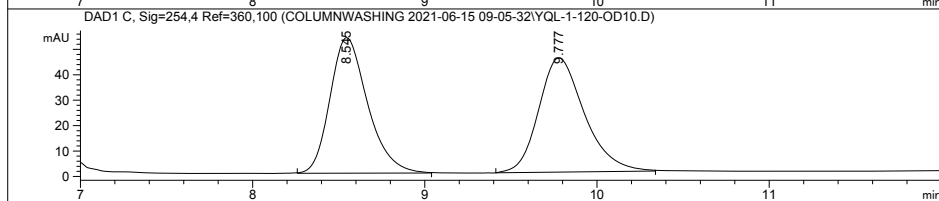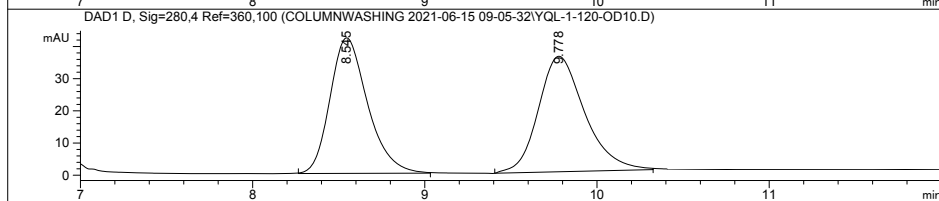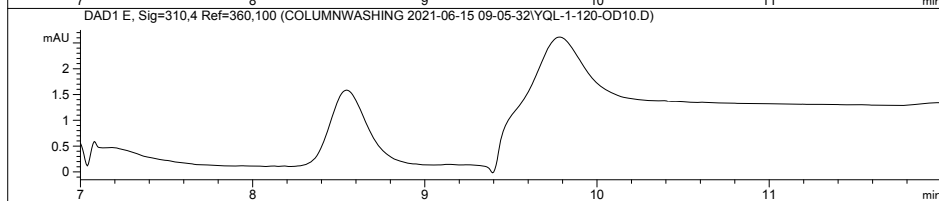

```

=====
                          Area Percent Report
=====
Sorted By      :      Signal
Multiplier    :      1.0000
Dilution      :      1.0000
Use Multiplier & Dilution Factor with ISTDs
  
```

Signal 1: DAD1 A, Sig=210,4 Ref=360,100

| Peak #   | RetTime [min] | Type | Width [min] | Area [mAU*s] | Height [mAU] | Area %  |
|----------|---------------|------|-------------|--------------|--------------|---------|
| 1        | 8.545         | BB   | 0.2316      | 1554.74780   | 102.16038    | 50.3645 |
| 2        | 9.777         | BB   | 0.2748      | 1532.24512   | 84.78561     | 49.6355 |
| Totals : |               |      |             | 3086.99292   | 186.94599    |         |

Signal 2: DAD1 B, Sig=230,4 Ref=360,100

| Peak #   | RetTime [min] | Type | Width [min] | Area [mAU*s] | Height [mAU] | Area %  |
|----------|---------------|------|-------------|--------------|--------------|---------|
| 1        | 8.545         | BB   | 0.2314      | 1641.40845   | 107.91986    | 49.7606 |
| 2        | 9.778         | BB   | 0.2770      | 1657.20349   | 90.76108     | 50.2394 |
| Totals : |               |      |             | 3298.61194   | 198.68094    |         |

Signal 3: DAD1 C, Sig=254,4 Ref=360,100

| Peak #   | RetTime [min] | Type | Width [min] | Area [mAU*s] | Height [mAU] | Area %  |
|----------|---------------|------|-------------|--------------|--------------|---------|
| 1        | 8.545         | BB   | 0.2310      | 809.22986    | 53.33179     | 49.4336 |
| 2        | 9.777         | BB   | 0.2790      | 827.77338    | 44.91850     | 50.5664 |
| Totals : |               |      |             | 1637.00323   | 98.25029     |         |

Signal 4: DAD1 D, Sig=280,4 Ref=360,100

| Peak #   | RetTime [min] | Type | Width [min] | Area [mAU*s] | Height [mAU] | Area %  |
|----------|---------------|------|-------------|--------------|--------------|---------|
| 1        | 8.545         | BB   | 0.2310      | 638.96191    | 42.11697     | 48.7686 |
| 2        | 9.778         | BB   | 0.2822      | 671.22949    | 35.89653     | 51.2314 |
| Totals : |               |      |             | 1310.19141   | 78.01350     |         |

Signal 5: DAD1 E, Sig=310,4 Ref=360,100

\*\*\* End of Report \*\*\*

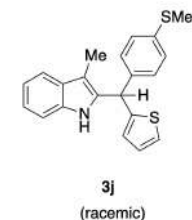

Sample Name:

```

=====
Acq. Operator   :                               Seq. Line :   34
Acq. Instrument : Instrument 1                   Location  : Vial 51
Injection Date  : 7/31/2021 8:57:38 PM          Inj       :    1
                                                Inj Volume: 5.000 µl
Different Inj Volume from Sequence ! Actual Inj Volume : 2.000 µl
Acq. Method     : C:\CHEM32\1\DATA\SUN_12 2021-07-31 09-26-07\OD-10-15.M
Last changed    : 7/31/2021 8:40:42 PM
                (modified after loading)
Analysis Method : C:\CHEM32\1\METHODS\IC-07-60-0.5ML.M
Last changed    : 8/27/2021 10:40:50 AM
                (modified after loading)
Additional Info : Peak(s) manually integrated
    
```

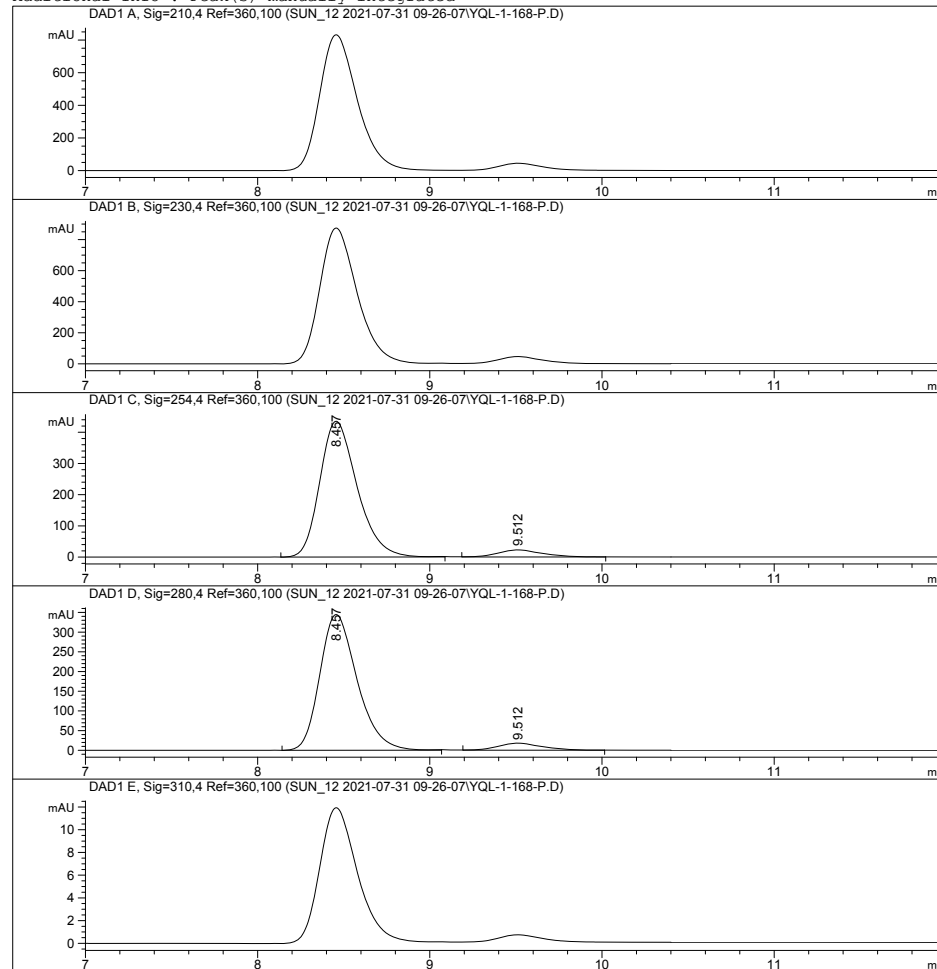

Sample Name:

```

=====
                          Area Percent Report
=====
Sorted By      :      Signal
Multiplier     :      1.0000
Dilution       :      1.0000
Use Multiplier & Dilution Factor with ISTDs
    
```

Signal 1: DAD1 A, Sig=210,4 Ref=360,100

Signal 2: DAD1 B, Sig=230,4 Ref=360,100

Signal 3: DAD1 C, Sig=254,4 Ref=360,100

| Peak # | RetTime [min] | Type | Width [min] | Area [mAU*s] | Height [mAU] | Area %  |
|--------|---------------|------|-------------|--------------|--------------|---------|
| 1      | 8.457         | BB   | 0.2317      | 6552.91553   | 435.21640    | 94.1902 |
| 2      | 9.512         | BB   | 0.2732      | 404.19287    | 22.53686     | 5.8098  |

Totals : 6957.10840 457.75326

Signal 4: DAD1 D, Sig=280,4 Ref=360,100

| Peak # | RetTime [min] | Type | Width [min] | Area [mAU*s] | Height [mAU] | Area %  |
|--------|---------------|------|-------------|--------------|--------------|---------|
| 1      | 8.457         | BB   | 0.2316      | 5189.23193   | 344.71332    | 94.1993 |
| 2      | 9.512         | BB   | 0.2732      | 319.54523    | 17.82043     | 5.8007  |

Totals : 5508.77716 362.53374

Signal 5: DAD1 E, Sig=310,4 Ref=360,100

\*\*\* End of Report \*\*\*

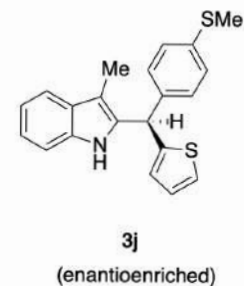

```

=====
Acq. Operator   :                               Seq. Line : 21
Acq. Instrument : Instrument 1                  Location  : Vial 52
Injection Date  : 8/1/2021 9:12:29 PM          Inj       : 1
                                           Inj Volume: 5.000 µl
Different Inj Volume from Sequence ! Actual Inj Volume : 8.000 µl
Acq. Method    : C:\CHEM32\1\DATA\SUN_12 2021-08-01 15-22-26\AD-02-30.M
Last changed   : 8/1/2021 8:40:34 PM
                                           (modified after loading)
Analysis Method : C:\CHEM32\1\METHODS\IC-07-60-0.5ML.M
Last changed   : 8/27/2021 4:05:22 PM
                                           (modified after loading)
Additional Info : Peak(s) manually integrated
  
```

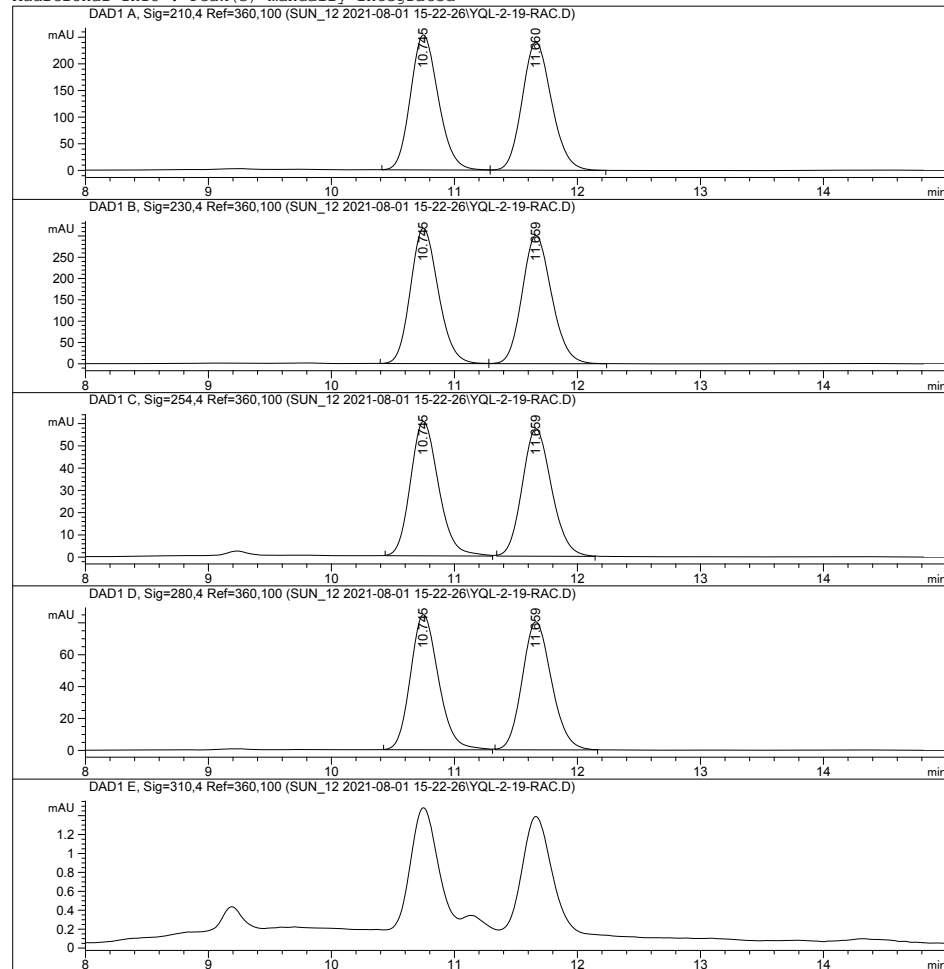

```

=====
                          Area Percent Report
=====
Sorted By      :      Signal
Multiplier    :      1.0000
Dilution      :      1.0000
Use Multiplier & Dilution Factor with ISTDs
  
```

Signal 1: DAD1 A, Sig=210,4 Ref=360,100

| Peak # | RetTime [min] | Type | Width [min] | Area [mAU*s] | Height [mAU] | Area %  |
|--------|---------------|------|-------------|--------------|--------------|---------|
| 1      | 10.745        | BV   | 0.2429      | 3975.63159   | 253.58324    | 49.9317 |
| 2      | 11.660        | VB   | 0.2575      | 3986.50488   | 240.33554    | 50.0683 |

Totals : 7962.13647 493.91878

Signal 2: DAD1 B, Sig=230,4 Ref=360,100

| Peak # | RetTime [min] | Type | Width [min] | Area [mAU*s] | Height [mAU] | Area %  |
|--------|---------------|------|-------------|--------------|--------------|---------|
| 1      | 10.745        | BV   | 0.2431      | 4988.18896   | 317.92114    | 49.9227 |
| 2      | 11.659        | VB   | 0.2578      | 5003.62646   | 301.20465    | 50.0773 |

Totals : 9991.81543 619.12579

Signal 3: DAD1 C, Sig=254,4 Ref=360,100

| Peak # | RetTime [min] | Type | Width [min] | Area [mAU*s] | Height [mAU] | Area %  |
|--------|---------------|------|-------------|--------------|--------------|---------|
| 1      | 10.745        | BB   | 0.2447      | 957.09467    | 60.44659     | 50.2162 |
| 2      | 11.659        | BB   | 0.2573      | 948.85181    | 57.26980     | 49.7838 |

Totals : 1905.94647 117.71639

Signal 4: DAD1 D, Sig=280,4 Ref=360,100

| Peak # | RetTime [min] | Type | Width [min] | Area [mAU*s] | Height [mAU] | Area %  |
|--------|---------------|------|-------------|--------------|--------------|---------|
| 1      | 10.745        | BB   | 0.2445      | 1341.49451   | 84.82977     | 50.1741 |
| 2      | 11.659        | BB   | 0.2574      | 1332.18311   | 80.34924     | 49.8259 |

Totals : 2673.67761 165.17901

Signal 5: DAD1 E, Sig=310,4 Ref=360,100

\*\*\* End of Report \*\*\*

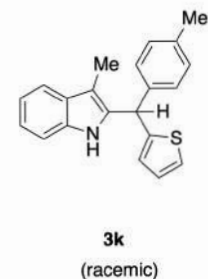

Sample Name:

```

=====
Acq. Operator   :                               Seq. Line :   20
Acq. Instrument : Instrument 1                   Location  : Vial 51
Injection Date  : 8/1/2021 8:41:26 PM           Inj       :    1
                                                Inj Volume: 5.000 µl
Acq. Method    : C:\CHEM32\1\DATA\SUN_12 2021-08-01 15-22-26\AD-02-30.M
Last changed   : 8/1/2021 8:40:34 PM
                (modified after loading)
Analysis Method: C:\CHEM32\1\METHODS\IC-07-60-0.5ML.M
Last changed   : 8/27/2021 10:57:54 AM
                (modified after loading)
Additional Info : Peak(s) manually integrated
  
```

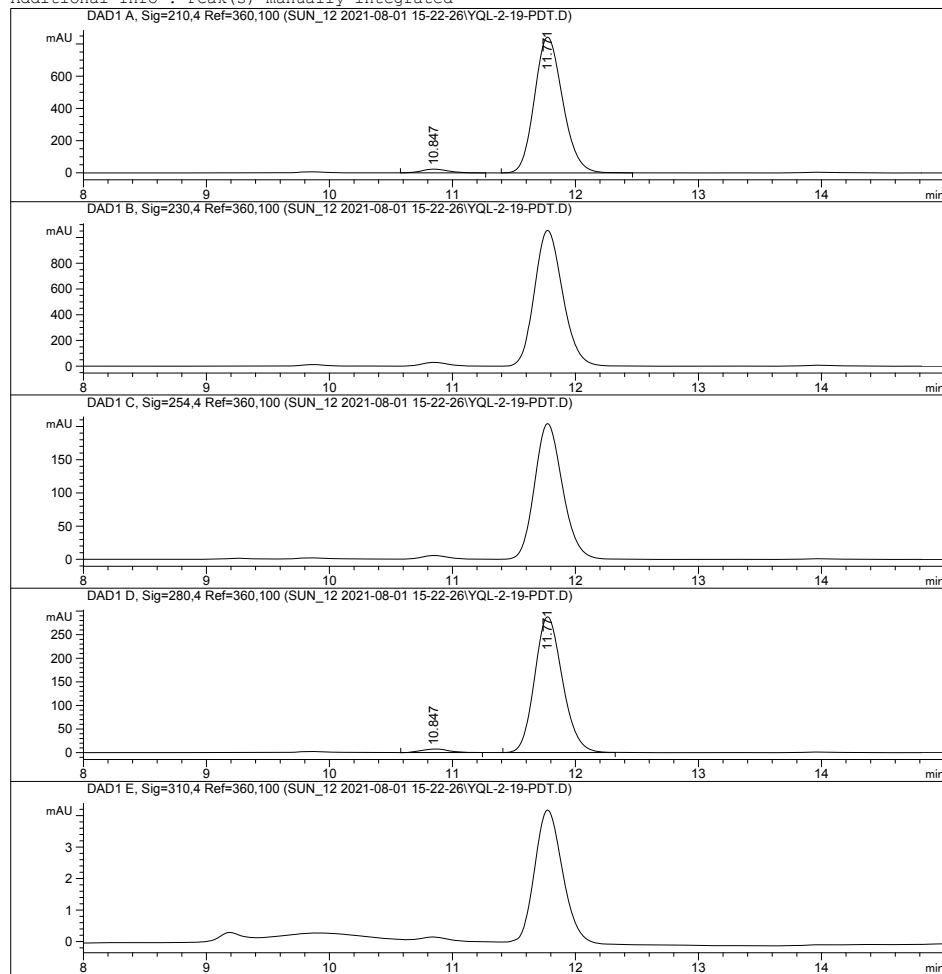

Sample Name:

```

=====
                          Area Percent Report
=====
Sorted By      :      Signal
Multiplier    :      1.0000
Dilution      :      1.0000
Use Multiplier & Dilution Factor with ISTDs
  
```

Signal 1: DAD1 A, Sig=210,4 Ref=360,100

| Peak # | RetTime [min] | Type | Width [min] | Area [mAU*s] | Height [mAU] | Area %  |
|--------|---------------|------|-------------|--------------|--------------|---------|
| 1      | 10.847        | BB   | 0.2260      | 339.89786    | 23.33245     | 2.4679  |
| 2      | 11.771        | BB   | 0.2479      | 1.34329e4    | 842.92230    | 97.5321 |

Totals : 1.37728e4 866.25475

Signal 2: DAD1 B, Sig=230,4 Ref=360,100

Signal 3: DAD1 C, Sig=254,4 Ref=360,100

Signal 4: DAD1 D, Sig=280,4 Ref=360,100

| Peak # | RetTime [min] | Type | Width [min] | Area [mAU*s] | Height [mAU] | Area %  |
|--------|---------------|------|-------------|--------------|--------------|---------|
| 1      | 10.847        | BB   | 0.2226      | 111.17725    | 7.69383      | 2.3950  |
| 2      | 11.771        | BB   | 0.2438      | 4530.93994   | 287.64584    | 97.6050 |

Totals : 4642.11719 295.33967

Signal 5: DAD1 E, Sig=310,4 Ref=360,100

\*\*\* End of Report \*\*\*

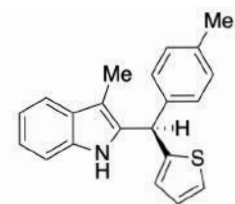

**3k**  
(enantioenriched)

```

=====
Acq. Operator   :                               Seq. Line :    9
Acq. Instrument : Instrument 1                   Location  : Vial 62
Injection Date  : 8/5/2021 7:00:28 PM           Inj       :    1
                                           Inj Volume: 5.000 µl
Different Inj Volume from Sequence ! Actual Inj Volume : 4.000 µl
Acq. Method    : C:\CHEM32\1\DATA\SUN_12 2021-08-05 15-29-27\AD-01-30.M
Last changed   : 8/5/2021 6:28:33 PM
                                           (modified after loading)
Analysis Method : C:\CHEM32\1\METHODS\AS-20-60-0.5.M
Last changed   : 8/5/2021 8:27:16 PM
                                           (modified after loading)
Additional Info : Peak(s) manually integrated
  
```

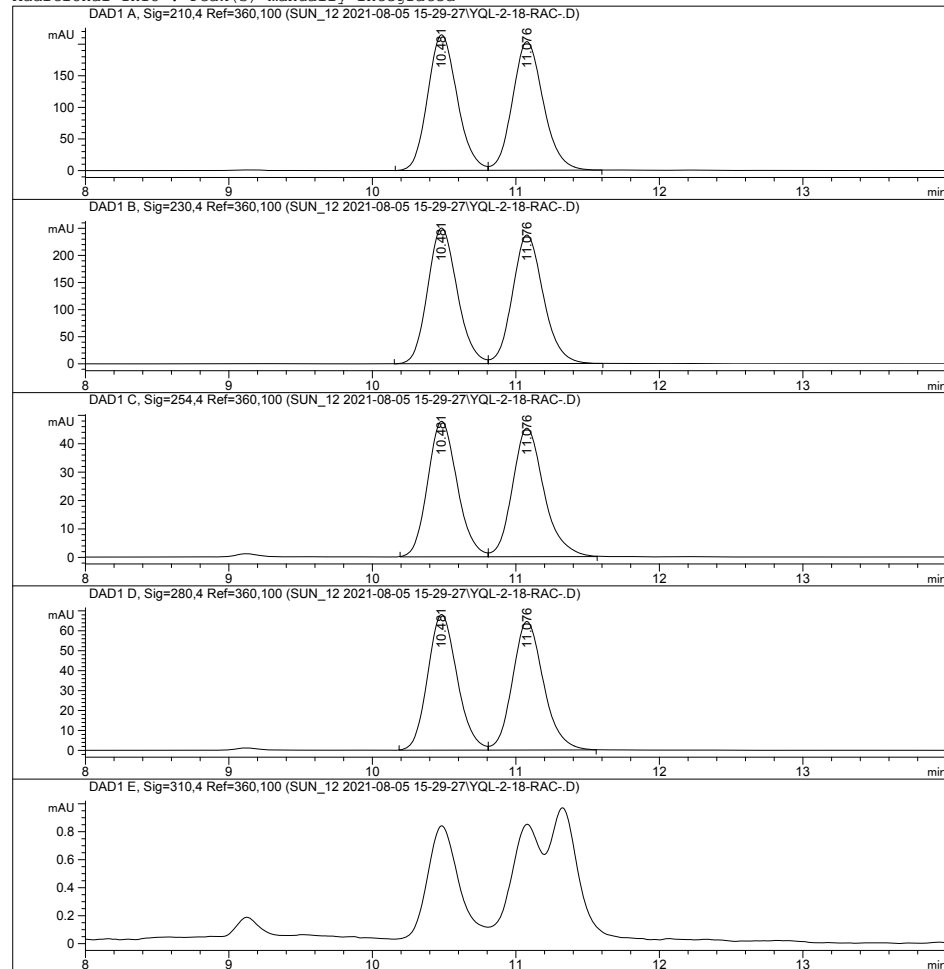

```

=====
                          Area Percent Report
=====
Sorted By      :      Signal
Multiplier    :      1.0000
Dilution      :      1.0000
Use Multiplier & Dilution Factor with ISTDs
  
```

Signal 1: DAD1 A, Sig=210,4 Ref=360,100

| Peak # | RetTime [min] | Type | Width [min] | Area [mAU*s] | Height [mAU] | Area %  |
|--------|---------------|------|-------------|--------------|--------------|---------|
| 1      | 10.481        | BV   | 0.2203      | 3058.82690   | 214.55069    | 50.2156 |
| 2      | 11.076        | VB   | 0.2299      | 3032.55640   | 203.45877    | 49.7844 |

Totals : 6091.38330 418.00946

Signal 2: DAD1 B, Sig=230,4 Ref=360,100

| Peak # | RetTime [min] | Type | Width [min] | Area [mAU*s] | Height [mAU] | Area %  |
|--------|---------------|------|-------------|--------------|--------------|---------|
| 1      | 10.481        | BV   | 0.2204      | 3569.91211   | 250.25285    | 50.2169 |
| 2      | 11.076        | VB   | 0.2301      | 3539.07373   | 237.21893    | 49.7831 |

Totals : 7108.98584 487.47179

Signal 3: DAD1 C, Sig=254,4 Ref=360,100

| Peak # | RetTime [min] | Type | Width [min] | Area [mAU*s] | Height [mAU] | Area %  |
|--------|---------------|------|-------------|--------------|--------------|---------|
| 1      | 10.481        | BV   | 0.2202      | 679.87537    | 47.71381     | 49.5947 |
| 2      | 11.076        | VB   | 0.2341      | 690.98895    | 45.25302     | 50.4053 |

Totals : 1370.86432 92.96682

Signal 4: DAD1 D, Sig=280,4 Ref=360,100

| Peak # | RetTime [min] | Type | Width [min] | Area [mAU*s] | Height [mAU] | Area %  |
|--------|---------------|------|-------------|--------------|--------------|---------|
| 1      | 10.481        | BV   | 0.2201      | 968.39294    | 68.03474     | 50.0410 |
| 2      | 11.076        | VB   | 0.2309      | 966.80481    | 64.48117     | 49.9590 |

Totals : 1935.19775 132.51591

Signal 5: DAD1 E, Sig=310,4 Ref=360,100

\*\*\* End of Report \*\*\*

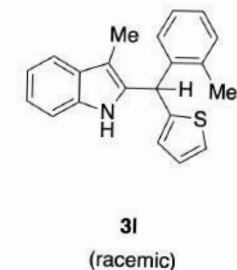



```

=====
Acq. Operator   :                               Seq. Line :    8
Acq. Instrument : Instrument 1                   Location  : Vial 61
Injection Date  : 8/5/2021 6:29:25 PM           Inj       :    1
                                           Inj Volume: 5.000 µl
Acq. Method    : C:\CHEM32\1\DATA\SUN_12 2021-08-05 15-29-27\AD-01-30.M
Last changed   : 8/5/2021 6:28:33 PM
                (modified after loading)
Analysis Method: C:\CHEM32\1\METHODS\IC-07-60-0.5ML.M
Last changed   : 8/27/2021 10:55:09 AM
                (modified after loading)
Additional Info : Peak(s) manually integrated
  
```

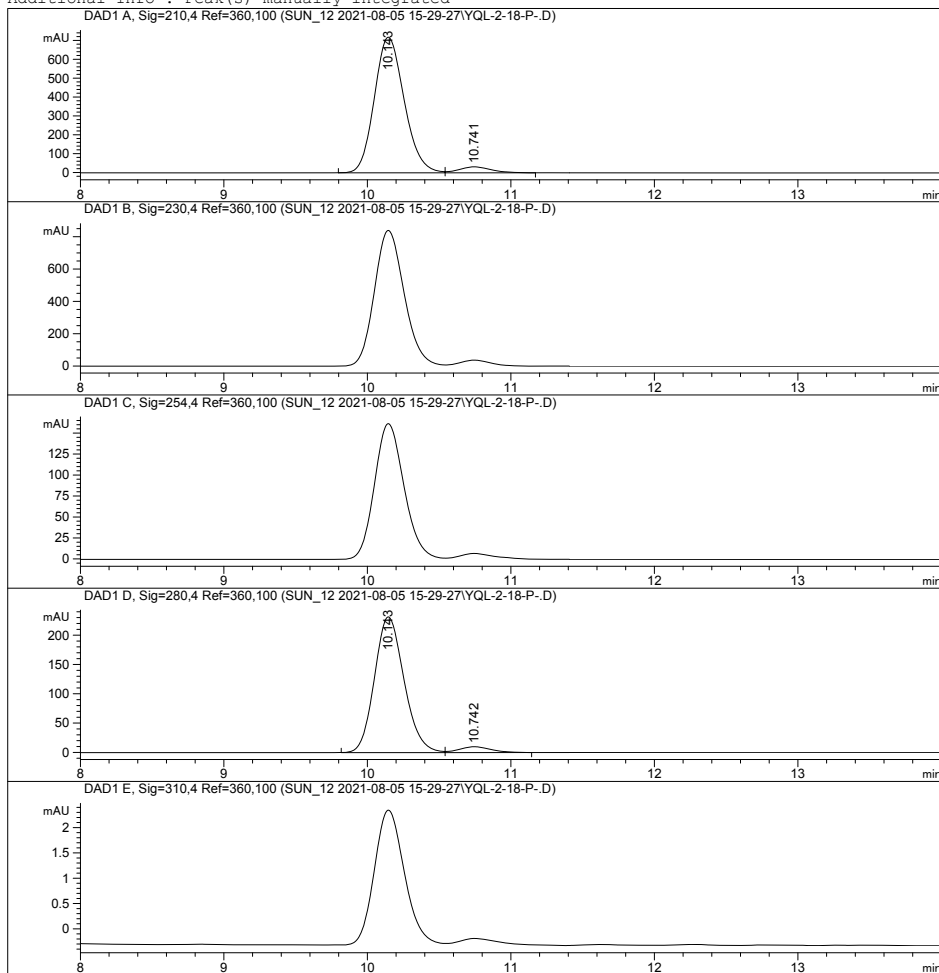

=====  
 Area Percent Report  
 =====

```

Sorted By      :      Signal
Multiplier     :      1.0000
Dilution       :      1.0000
Use Multiplier & Dilution Factor with ISTDs
  
```

Signal 1: DAD1 A, Sig=210,4 Ref=360,100

| Peak #   | RetTime [min] | Type | Width [min] | Area [mAU*s] | Height [mAU] | Area %  |
|----------|---------------|------|-------------|--------------|--------------|---------|
| 1        | 10.143        | BV   | 0.2241      | 1.03618e4    | 719.05554    | 95.5579 |
| 2        | 10.741        | VB   | 0.2314      | 481.67227    | 31.67855     | 4.4421  |
| Totals : |               |      |             | 1.08434e4    | 750.73409    |         |

Signal 2: DAD1 B, Sig=230,4 Ref=360,100

Signal 3: DAD1 C, Sig=254,4 Ref=360,100

Signal 4: DAD1 D, Sig=280,4 Ref=360,100

| Peak #   | RetTime [min] | Type | Width [min] | Area [mAU*s] | Height [mAU] | Area %  |
|----------|---------------|------|-------------|--------------|--------------|---------|
| 1        | 10.143        | BV   | 0.2209      | 3315.61475   | 231.72086    | 95.5891 |
| 2        | 10.742        | VB   | 0.2339      | 152.99873    | 10.03352     | 4.4109  |
| Totals : |               |      |             | 3468.61348   | 241.75438    |         |

Signal 5: DAD1 E, Sig=310,4 Ref=360,100

\*\*\* End of Report \*\*\*

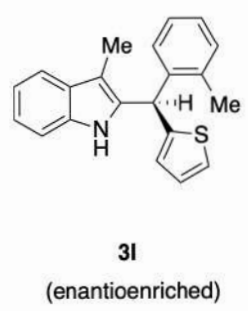

```
=====
Acq. Operator   :                               Seq. Line : 29
Acq. Instrument : Instrument 1                   Location  : Vial 61
Injection Date  : 7/6/2021 8:02:38 PM          Inj       : 1
                                                Inj Volume: 5.000 µl
Different Inj Volume from Sequence ! Actual Inj Volume : 8.000 µl
Acq. Method    : C:\CHEM32\1\DATA\SUN_12 2021-07-06 10-22-23\OD-03-30.M
Last changed   : 7/6/2021 8:01:46 PM
                (modified after loading)
Analysis Method : C:\CHEM32\1\METHODS\IC-07-60-0.5ML.M
Last changed   : 8/27/2021 3:48:08 PM
                (modified after loading)
Additional Info : Peak(s) manually integrated
```

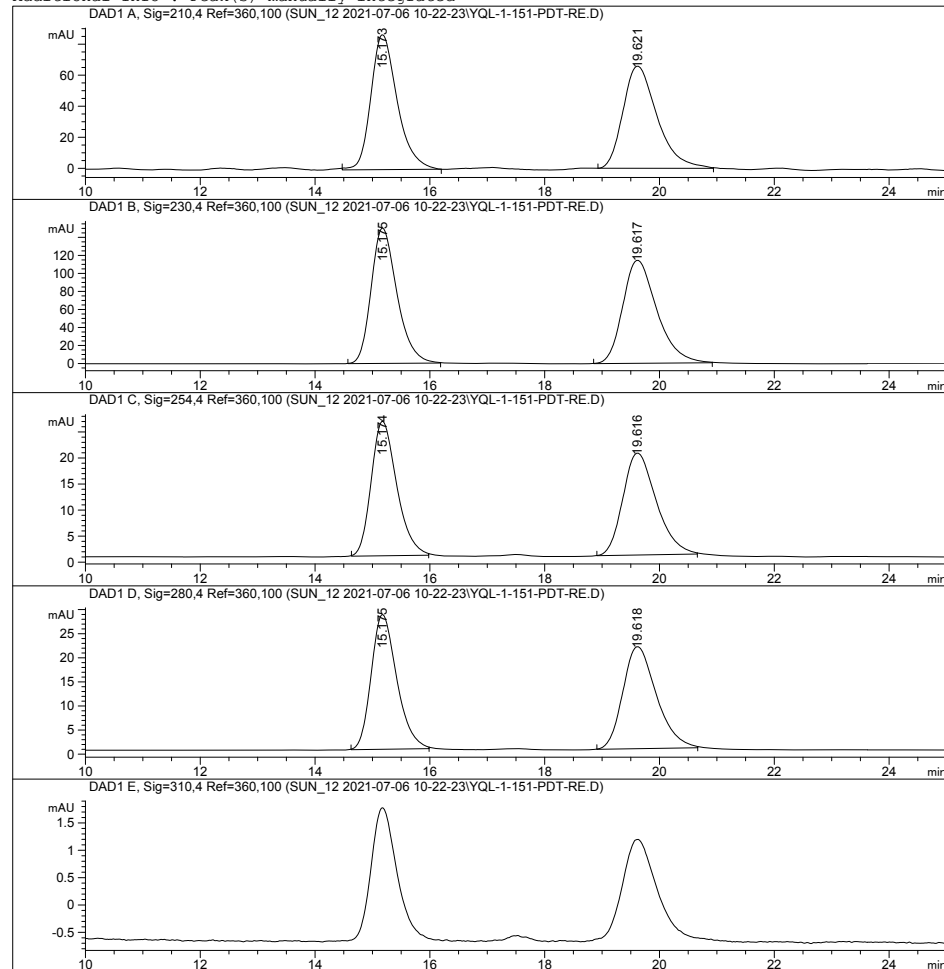

```
=====
                          Area Percent Report
=====
Sorted By      :      Signal
Multiplier    :      1.0000
Dilution      :      1.0000
Use Multiplier & Dilution Factor with ISTDs
```

Signal 1: DAD1 A, Sig=210,4 Ref=360,100

| Peak # | RetTime [min] | Type | Width [min] | Area [mAU*s] | Height [mAU] | Area %  |
|--------|---------------|------|-------------|--------------|--------------|---------|
| 1      | 15.173        | BB   | 0.4862      | 2771.65674   | 86.88142     | 50.5265 |
| 2      | 19.621        | BB   | 0.5942      | 2713.89063   | 65.93614     | 49.4735 |

Totals : 5485.54736 152.81757

Signal 2: DAD1 B, Sig=230,4 Ref=360,100

| Peak # | RetTime [min] | Type | Width [min] | Area [mAU*s] | Height [mAU] | Area %  |
|--------|---------------|------|-------------|--------------|--------------|---------|
| 1      | 15.175        | BB   | 0.4785      | 4695.36816   | 150.27930    | 49.8358 |
| 2      | 19.617        | BB   | 0.6293      | 4726.31592   | 114.55789    | 50.1642 |

Totals : 9421.68408 264.83719

Signal 3: DAD1 C, Sig=254,4 Ref=360,100

| Peak # | RetTime [min] | Type | Width [min] | Area [mAU*s] | Height [mAU] | Area %  |
|--------|---------------|------|-------------|--------------|--------------|---------|
| 1      | 15.174        | BB   | 0.4744      | 797.37183    | 25.81054     | 50.2317 |
| 2      | 19.616        | BB   | 0.6166      | 790.01532    | 19.58684     | 49.7683 |

Totals : 1587.38715 45.39738

Signal 4: DAD1 D, Sig=280,4 Ref=360,100

| Peak # | RetTime [min] | Type | Width [min] | Area [mAU*s] | Height [mAU] | Area %  |
|--------|---------------|------|-------------|--------------|--------------|---------|
| 1      | 15.175        | BB   | 0.4766      | 864.51868    | 27.96685     | 50.1680 |
| 2      | 19.618        | BB   | 0.6105      | 858.72845    | 21.20452     | 49.8320 |

Totals : 1723.24713 49.17137

Signal 5: DAD1 E, Sig=310,4 Ref=360,100

```
=====
*** End of Report ***
```

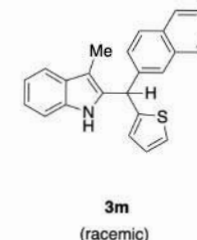

Data File C:\CHEM32\1\DATA\SUN\_12 2021-07-06 10-22-23\YQL-1-151-RAC-RE.D  
 Sample Name:

=====  
 Acq. Operator :                      Seq. Line : 30  
 Acq. Instrument : Instrument 1        Location : Vial 62  
 Injection Date : 7/6/2021 8:34:09 PM   Inj : 1  
                                           Inj Volume : 5.000 µl  
 Different Inj Volume from Sequence !   Actual Inj Volume : 8.000 µl  
 Acq. Method : C:\CHEM32\1\DATA\SUN\_12 2021-07-06 10-22-23\OD-03-30.M  
 Last changed : 7/6/2021 8:01:46 PM  
                                           (modified after loading)  
 Analysis Method : C:\CHEM32\1\METHODS\IC-07-60-0.5ML.M  
 Last changed : 8/27/2021 10:34:02 AM  
                                           (modified after loading)  
 Additional Info : Peak(s) manually integrated

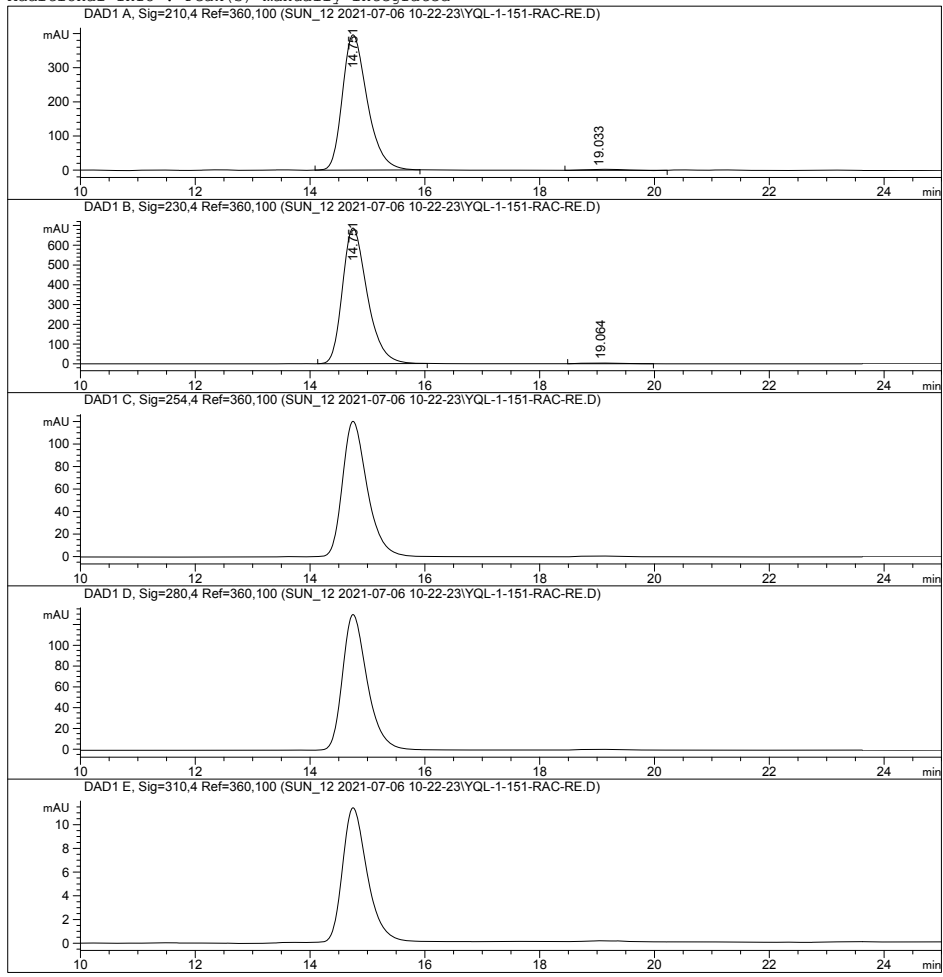

Data File C:\CHEM32\1\DATA\SUN\_12 2021-07-06 10-22-23\YQL-1-151-RAC-RE.D  
 Sample Name:

=====  
 Area Percent Report  
 =====

Sorted By : Signal  
 Multiplier : 1.0000  
 Dilution : 1.0000  
 Use Multiplier & Dilution Factor with ISTDs

Signal 1: DAD1 A, Sig=210,4 Ref=360,100

| Peak # | RetTime [min] | Type | Width [min] | Area [mAU*s] | Height [mAU] | Area %  |
|--------|---------------|------|-------------|--------------|--------------|---------|
| 1      | 14.751        | BB   | 0.4566      | 1.19124e4    | 396.36139    | 99.0691 |
| 2      | 19.033        | BB   | 0.4546      | 111.93133    | 2.92384      | 0.9309  |

Totals :                               1.20244e4   399.28523

Signal 2: DAD1 B, Sig=230,4 Ref=360,100

| Peak # | RetTime [min] | Type | Width [min] | Area [mAU*s] | Height [mAU] | Area %  |
|--------|---------------|------|-------------|--------------|--------------|---------|
| 1      | 14.751        | BB   | 0.4581      | 2.05951e4    | 686.31970    | 99.1742 |
| 2      | 19.064        | BB   | 0.5181      | 171.49834    | 4.29237      | 0.8258  |

Totals :                               2.07666e4   690.61207

Signal 3: DAD1 C, Sig=254,4 Ref=360,100

Signal 4: DAD1 D, Sig=280,4 Ref=360,100

Signal 5: DAD1 E, Sig=310,4 Ref=360,100

=====  
 \*\*\* End of Report \*\*\*

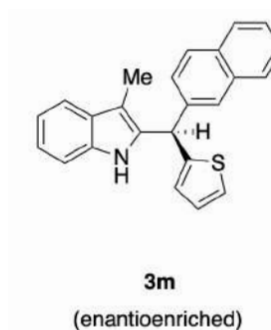

```

=====
Acq. Operator   :                               Seq. Line :    4
Acq. Instrument : Instrument 1                   Location  : Vial 53
Injection Date  : 7/14/2021 4:49:12 PM          Inj       :    1
                                           Inj Volume: 1.000 µl
Different Inj Volume from Sequence ! Actual Inj Volume : 3.000 µl
Acq. Method    : C:\CHEM32\1\DATA\SUN_12 2021-07-14 15-33-46\AD-03-25-1.0.M
Last changed   : 9/5/2019 8:00:44 PM
Analysis Method: C:\CHEM32\1\METHODS\IC-07-60-0.5ML.M
Last changed   : 8/27/2021 3:56:51 PM
                (modified after loading)
Additional Info : Peak(s) manually integrated
  
```

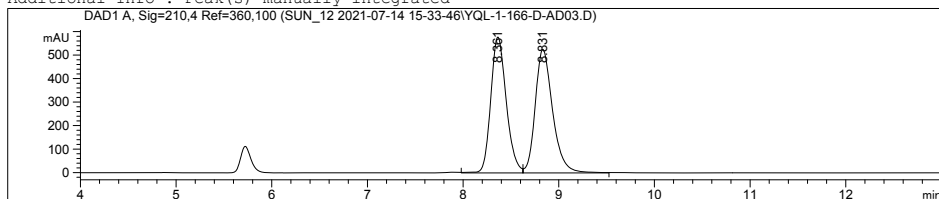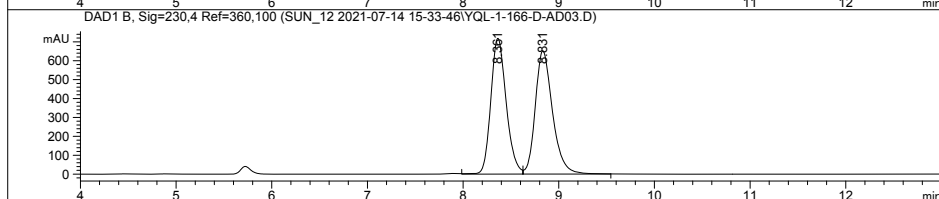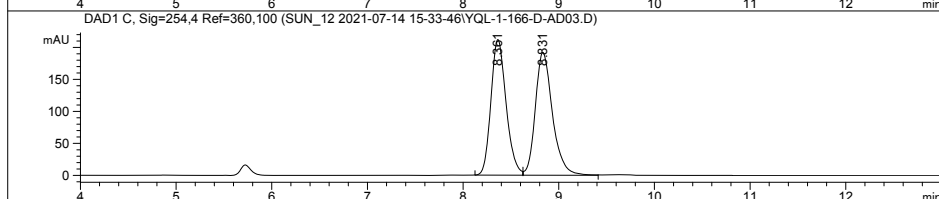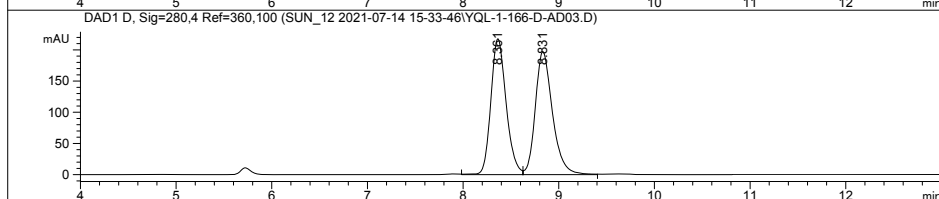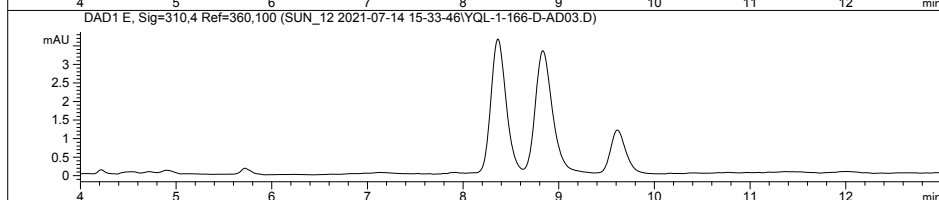

```

=====
                          Area Percent Report
=====
Sorted By      :      Signal
Multiplier    :      1.0000
Dilution      :      1.0000
Use Multiplier & Dilution Factor with ISTDs
  
```

Signal 1: DAD1 A, Sig=210,4 Ref=360,100

| Peak # | RetTime [min] | Type | Width [min] | Area [mAU*s] | Height [mAU] | Area %  |
|--------|---------------|------|-------------|--------------|--------------|---------|
| 1      | 8.361         | VV   | 0.1731      | 6496.25879   | 578.26459    | 49.4503 |
| 2      | 8.831         | VB   | 0.1934      | 6640.67822   | 525.74817    | 50.5497 |

Totals : 1.31369e4 1104.01276

Signal 2: DAD1 B, Sig=230,4 Ref=360,100

| Peak # | RetTime [min] | Type | Width [min] | Area [mAU*s] | Height [mAU] | Area %  |
|--------|---------------|------|-------------|--------------|--------------|---------|
| 1      | 8.361         | VV   | 0.1722      | 8022.81543   | 718.81738    | 49.5349 |
| 2      | 8.831         | VB   | 0.1902      | 8173.48926   | 652.34888    | 50.4651 |

Totals : 1.61963e4 1371.16626

Signal 3: DAD1 C, Sig=254,4 Ref=360,100

| Peak # | RetTime [min] | Type | Width [min] | Area [mAU*s] | Height [mAU] | Area %  |
|--------|---------------|------|-------------|--------------|--------------|---------|
| 1      | 8.361         | BV   | 0.1685      | 2335.00879   | 212.03368    | 49.4463 |
| 2      | 8.831         | VB   | 0.1890      | 2387.29956   | 192.02716    | 50.5537 |

Totals : 4722.30835 404.06084

Signal 4: DAD1 D, Sig=280,4 Ref=360,100

| Peak # | RetTime [min] | Type | Width [min] | Area [mAU*s] | Height [mAU] | Area %  |
|--------|---------------|------|-------------|--------------|--------------|---------|
| 1      | 8.361         | VV   | 0.1693      | 2415.45068   | 217.87877    | 49.5721 |
| 2      | 8.831         | VB   | 0.1894      | 2457.15381   | 197.21736    | 50.4279 |

Totals : 4872.60449 415.09613

Signal 5: DAD1 E, Sig=310,4 Ref=360,100

\*\*\* End of Report \*\*\*

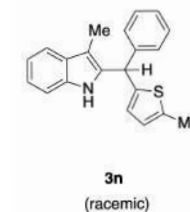

```
=====
Acq. Operator   :                               Seq. Line :    6
Acq. Instrument : Instrument 1                   Location  : Vial 51
Injection Date  : 7/18/2021 10:41:51 AM         Inj       :    1
                                           Inj Volume: 5.000 µl
Acq. Method    : C:\CHEM32\1\DATA\SUN_12 2021-07-18 08-52-46\AD-03-20.M
Last changed   : 7/2/2016 3:26:02 PM
Analysis Method: C:\CHEM32\1\METHODS\IC-07-60-0.5ML.M
Last changed   : 8/27/2021 10:43:14 AM
                    (modified after loading)
Additional Info : Peak(s) manually integrated
```

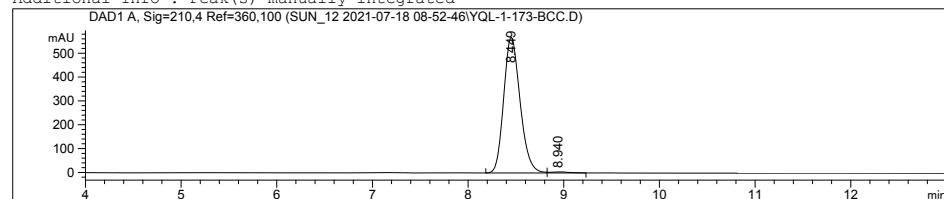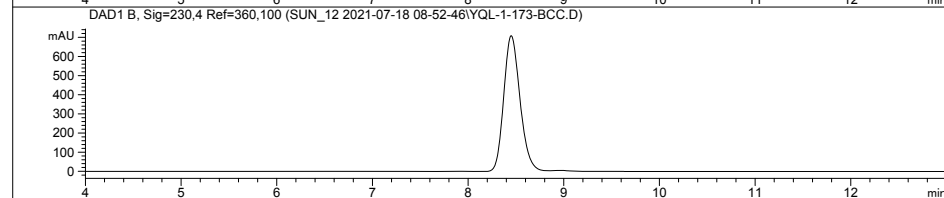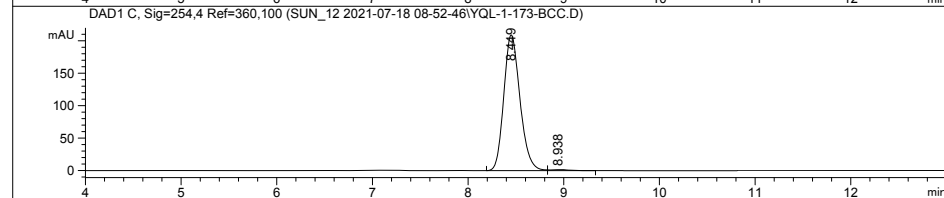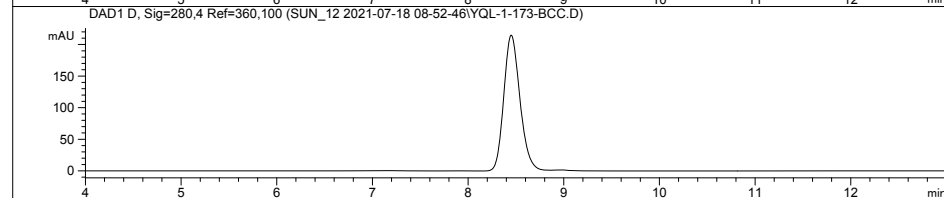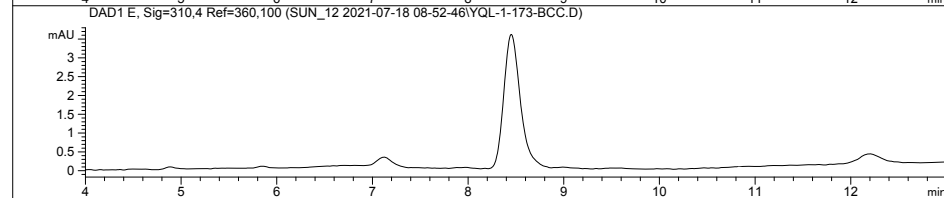

=====  
Area Percent Report  
=====

Sorted By : Signal  
Multiplier : 1.0000  
Dilution : 1.0000  
Use Multiplier & Dilution Factor with ISTDs

Signal 1: DAD1 A, Sig=210,4 Ref=360,100

| Peak # | RetTime [min] | Type | Width [min] | Area [mAU*s] | Height [mAU] | Area %  |
|--------|---------------|------|-------------|--------------|--------------|---------|
| 1      | 8.449         | BV   | 0.1824      | 6746.79590   | 568.71948    | 99.1410 |
| 2      | 8.940         | VB   | 0.1847      | 58.45686     | 4.35330      | 0.8590  |

Totals : 6805.25276 573.07278

Signal 2: DAD1 B, Sig=230,4 Ref=360,100

Signal 3: DAD1 C, Sig=254,4 Ref=360,100

| Peak # | RetTime [min] | Type | Width [min] | Area [mAU*s] | Height [mAU] | Area %  |
|--------|---------------|------|-------------|--------------|--------------|---------|
| 1      | 8.449         | BV   | 0.1806      | 2453.16284   | 209.45598    | 99.1783 |
| 2      | 8.938         | VB   | 0.1958      | 20.32515     | 1.52165      | 0.8217  |

Totals : 2473.48799 210.97762

Signal 4: DAD1 D, Sig=280,4 Ref=360,100

Signal 5: DAD1 E, Sig=310,4 Ref=360,100

=====  
\*\*\* End of Report \*\*\*

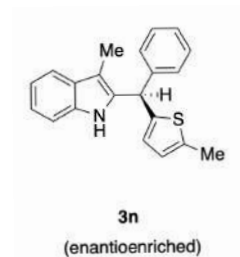

```

=====
Acq. Operator   :                               Seq. Line : 110
Acq. Instrument : Instrument 1                   Location  : Vial 61
Injection Date  : 7/31/2021 12:54:11 AM        Inj       : 1
                                                Inj Volume: 5.000 µl
Different Inj Volume from Sequence ! Actual Inj Volume : 10.000 µl
Acq. Method    : C:\CHEM32\1\DATA\SUN_0728 2021-07-29 10-57-32\AD-03-30.M
Last changed   : 1/30/2015 10:17:06 AM
Analysis Method: C:\CHEM32\1\METHODS\IC-07-60-0.5ML.M
Last changed   : 8/27/2021 4:07:18 PM
                (modified after loading)
    
```

Additional Info : Peak(s) manually integrated

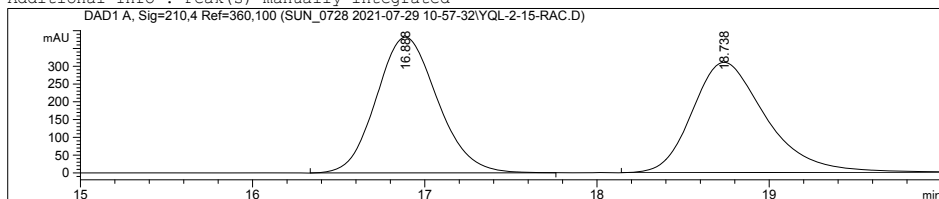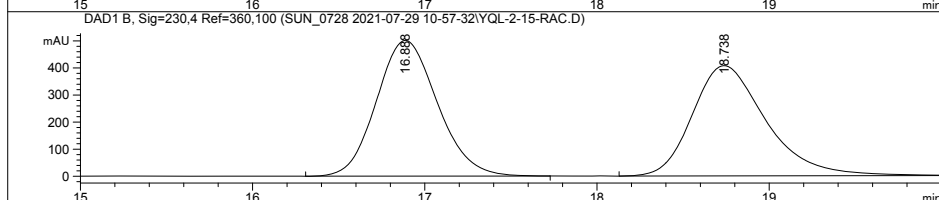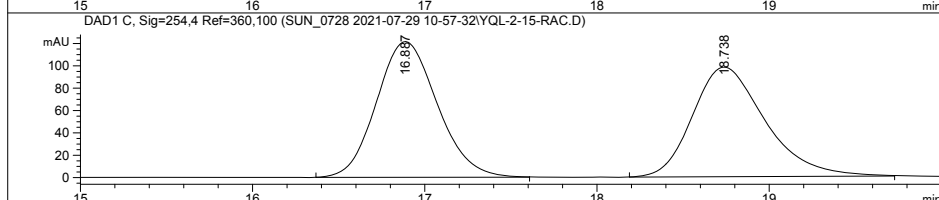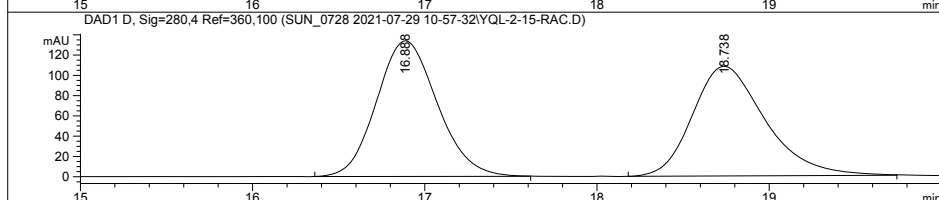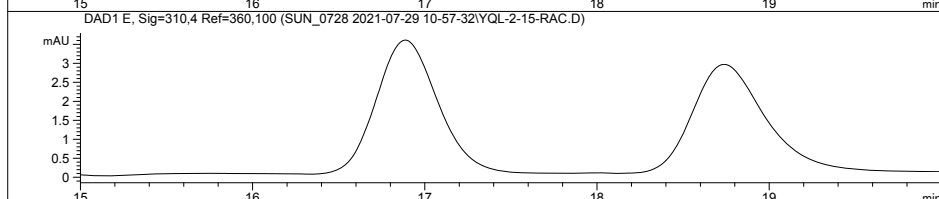

Area Percent Report

```

Sorted By      : Signal
Multiplier    : 1.0000
Dilution      : 1.0000
Use Multiplier & Dilution Factor with ISTDs
    
```

Signal 1: DAD1 A, Sig=210,4 Ref=360,100

| Peak # | RetTime [min] | Type | Width [min] | Area [mAU*s] | Height [mAU] | Area %  |
|--------|---------------|------|-------------|--------------|--------------|---------|
| 1      | 16.888        | BB   | 0.3818      | 9414.76855   | 381.70731    | 50.4797 |
| 2      | 18.738        | BB   | 0.4516      | 9235.84375   | 310.01077    | 49.5203 |

Totals : 1.86506e4 691.71808

Signal 2: DAD1 B, Sig=230,4 Ref=360,100

| Peak # | RetTime [min] | Type | Width [min] | Area [mAU*s] | Height [mAU] | Area %  |
|--------|---------------|------|-------------|--------------|--------------|---------|
| 1      | 16.888        | BB   | 0.3813      | 1.23456e4    | 501.41306    | 50.4719 |
| 2      | 18.738        | BB   | 0.4512      | 1.21148e4    | 407.12515    | 49.5281 |

Totals : 2.44604e4 908.53821

Signal 3: DAD1 C, Sig=254,4 Ref=360,100

| Peak # | RetTime [min] | Type | Width [min] | Area [mAU*s] | Height [mAU] | Area %  |
|--------|---------------|------|-------------|--------------|--------------|---------|
| 1      | 16.887        | BB   | 0.3807      | 2982.97070   | 121.39145    | 50.8971 |
| 2      | 18.738        | BB   | 0.4463      | 2877.81348   | 98.08718     | 49.1029 |

Totals : 5860.78418 219.47863

Signal 4: DAD1 D, Sig=280,4 Ref=360,100

| Peak # | RetTime [min] | Type | Width [min] | Area [mAU*s] | Height [mAU] | Area %  |
|--------|---------------|------|-------------|--------------|--------------|---------|
| 1      | 16.888        | BB   | 0.3804      | 3283.82007   | 133.78252    | 50.8602 |
| 2      | 18.738        | BB   | 0.4462      | 3172.73779   | 108.16469    | 49.1398 |

Totals : 6456.55786 241.94720

Signal 5: DAD1 E, Sig=310,4 Ref=360,100

\*\*\* End of Report \*\*\*

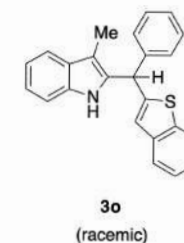

Sample Name:

```

=====
Acq. Operator   :                               Seq. Line :    8
Acq. Instrument : Instrument 1                   Location  : Vial 62
Injection Date  : 8/16/2021 11:00:09 AM        Inj       :    1
                                           Inj Volume: 5.000 µl
Different Inj Volume from Sequence ! Actual Inj Volume : 7.000 µl
Acq. Method     : C:\CHEM32\1\DATA\SUN_12 2021-08-16 09-26-58\AD-03-20.M
Last changed    : 7/2/2016 3:26:02 PM
Analysis Method : C:\CHEM32\1\METHODS\IC-07-60-0.5ML.M
Last changed    : 8/27/2021 10:59:27 AM
                  (modified after loading)
  
```

Additional Info : Peak(s) manually integrated

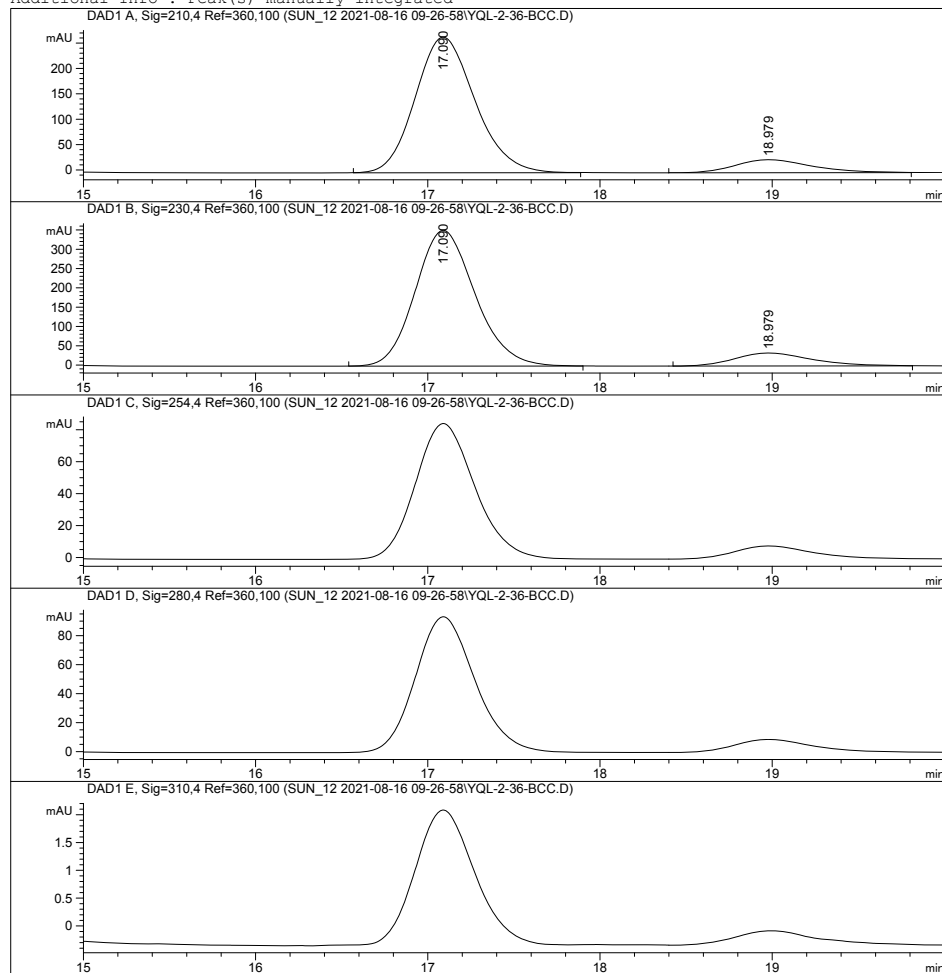

Sample Name:

## Area Percent Report

```

=====
Sorted By      :      Signal
Multiplier     :      1.0000
Dilution       :      1.0000
Use Multiplier & Dilution Factor with ISTDs
  
```

Signal 1: DAD1 A, Sig=210,4 Ref=360,100

| Peak # | RetTime [min] | Type | Width [min] | Area [mAU*s] | Height [mAU] | Area %  |
|--------|---------------|------|-------------|--------------|--------------|---------|
| 1      | 17.090        | BB   | 0.3717      | 6453.51807   | 267.27225    | 89.0859 |
| 2      | 18.979        | BB   | 0.4710      | 790.63757    | 25.69721     | 10.9141 |

Totals : 7244.15564 292.96946

Signal 2: DAD1 B, Sig=230,4 Ref=360,100

| Peak # | RetTime [min] | Type | Width [min] | Area [mAU*s] | Height [mAU] | Area %  |
|--------|---------------|------|-------------|--------------|--------------|---------|
| 1      | 17.090        | BB   | 0.3716      | 8486.82813   | 351.58978    | 89.0295 |
| 2      | 18.979        | BB   | 0.4702      | 1045.77271   | 33.68077     | 10.9705 |

Totals : 9532.60083 385.27055

Signal 3: DAD1 C, Sig=254,4 Ref=360,100

Signal 4: DAD1 D, Sig=280,4 Ref=360,100

Signal 5: DAD1 E, Sig=310,4 Ref=360,100

\*\*\* End of Report \*\*\*

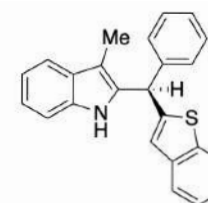

**3o**  
(enantioenriched)

Data File C:\CHEM32\1\DATA\SUN\_12 2021-09-17 19-54-12\YQL-2-66RAC-OD03.D  
Sample Name:

```
=====
Acq. Operator   :                               Seq. Line :   11
Acq. Instrument : Instrument 1                   Location  : Vial 51
Injection Date  : 9/17/2021 10:32:37 PM         Inj       :    1
                                           Inj Volume: 5.000 µl
Different Inj Volume from Sequence ! Actual Inj Volume : 10.000 µl
Acq. Method    : C:\CHEM32\1\DATA\SUN_12 2021-09-17 19-54-12\OD-03-30.M
Last changed   : 9/17/2021 10:31:43 PM
                (modified after loading)
Analysis Method: C:\CHEM32\1\METHODS\IC-10-45.M
Last changed   : 9/18/2021 4:24:08 PM
                (modified after loading)
Additional Info : Peak(s) manually integrated
=====
```

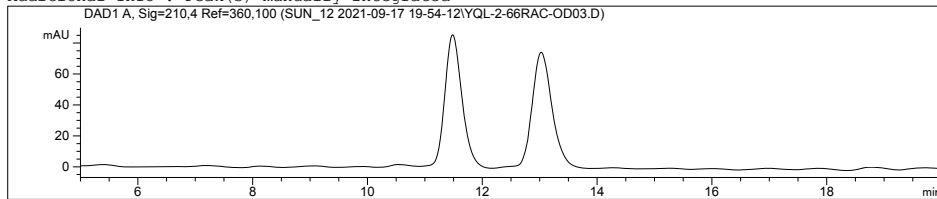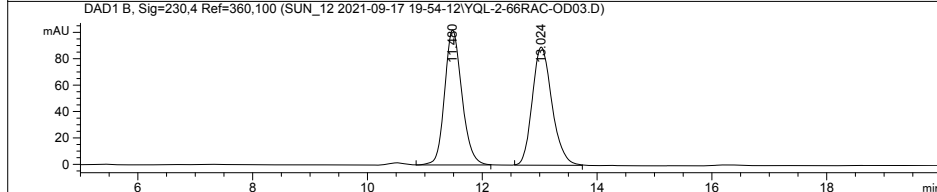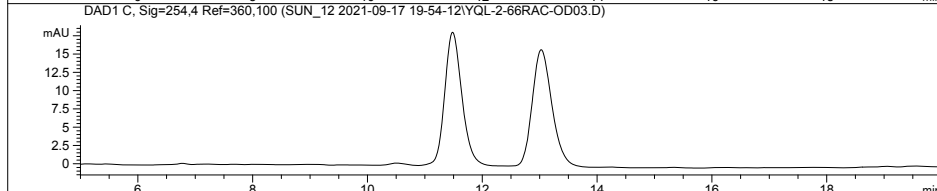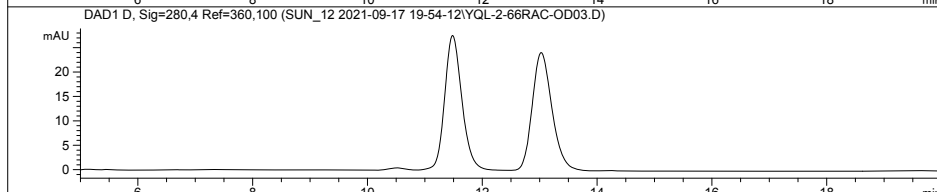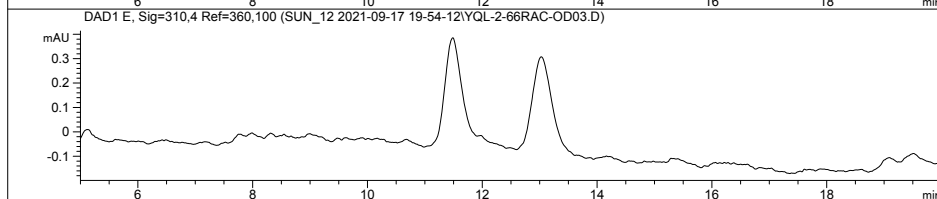

Data File C:\CHEM32\1\DATA\SUN\_12 2021-09-17 19-54-12\YQL-2-66RAC-OD03.D  
Sample Name:

```
=====
                          Area Percent Report
=====
Sorted By      :      Signal
Multiplier     :      1.0000
Dilution       :      1.0000
Use Multiplier & Dilution Factor with ISTDs
=====
```

Signal 1: DAD1 A, Sig=210,4 Ref=360,100  
Signal 2: DAD1 B, Sig=230,4 Ref=360,100

| Peak # | RetTime [min] | Type | Width [min] | Area [mAU*s] | Height [mAU] | Area %  |
|--------|---------------|------|-------------|--------------|--------------|---------|
| 1      | 11.480        | VB   | 0.3190      | 2129.92676   | 102.27116    | 50.0385 |
| 2      | 13.024        | BB   | 0.3673      | 2126.64722   | 89.48769     | 49.9615 |

Totals : 4256.57397 191.75885

Signal 3: DAD1 C, Sig=254,4 Ref=360,100  
Signal 4: DAD1 D, Sig=280,4 Ref=360,100  
Signal 5: DAD1 E, Sig=310,4 Ref=360,100

\*\*\* End of Report \*\*\*

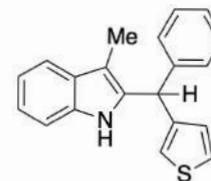

**3p**  
(racemic)



Sample Name:

```

=====
Acq. Operator   :                               Seq. Line :    2
Acq. Instrument : Instrument 1                  Location  : Vial 61
Injection Date  : 9/20/2021 6:36:17 PM        Inj       :    1
                                                Inj Volume: 5.000 µl
Different Inj Volume from Sequence ! Actual Inj Volume : 6.000 µl
Acq. Method    : C:\CHEM32\1\DATA\SUN_12 2021-09-20 18-23-06\OD-03-20.M
Last changed   : 9/20/2021 6:35:25 PM
                (modified after loading)
Analysis Method : C:\CHEM32\1\DATA\SUN_12 2021-09-14 22-04-02\AD-20-30.M
Last changed   : 9/20/2021 7:03:35 PM
                (modified after loading)
Additional Info : Peak(s) manually integrated
  
```

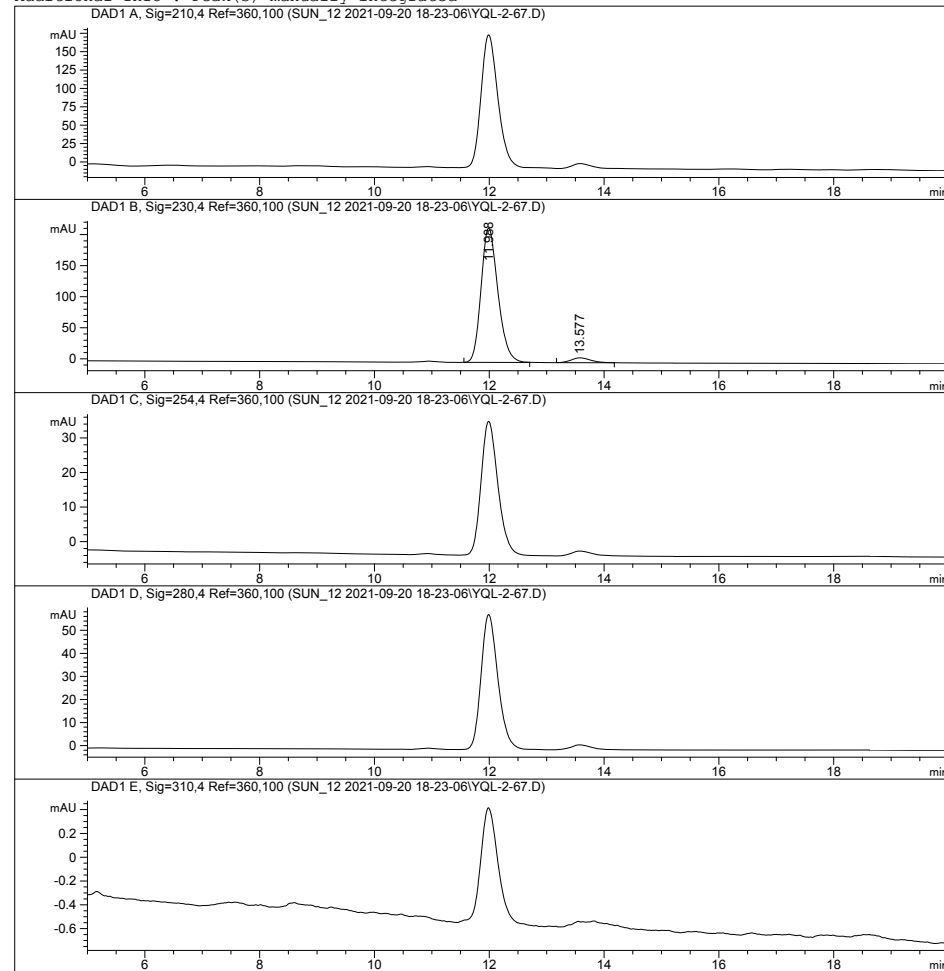

Sample Name:

```

=====
                          Area Percent Report
=====
Sorted By      :      Signal
Multiplier    :      1.0000
Dilution      :      1.0000
Use Multiplier & Dilution Factor with ISTDs
  
```

Signal 1: DAD1 A, Sig=210,4 Ref=360,100

Signal 2: DAD1 B, Sig=230,4 Ref=360,100

| Peak # | RetTime [min] | Type | Width [min] | Area [mAU*s] | Height [mAU] | Area %  |
|--------|---------------|------|-------------|--------------|--------------|---------|
| 1      | 11.988        | BB   | 0.3139      | 4412.83838   | 216.37926    | 96.0070 |
| 2      | 13.577        | BB   | 0.3498      | 183.53291    | 7.82150      | 3.9930  |

Totals : 4596.37129 224.20075

Signal 3: DAD1 C, Sig=254,4 Ref=360,100

Signal 4: DAD1 D, Sig=280,4 Ref=360,100

Signal 5: DAD1 E, Sig=310,4 Ref=360,100

\*\*\* End of Report \*\*\*

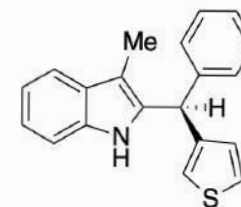

**3p**  
(enantioenriched)

Sample Name:

```

=====
Acq. Operator   :                               Seq. Line :   17
Acq. Instrument : Instrument 1                   Location  : Vial 51
Injection Date  : 10/16/2021 7:31:14 PM          Inj       :    1
                                          Inj Volume: 5.000 µl
Different Inj Volume from Sequence ! Actual Inj Volume : 10.000 µl
Acq. Method    : C:\CHEM32\1\DATA\SUN_12 2021-10-16 14-11-22\AD-03-30.M
Last changed   : 10/16/2021 7:30:20 PM
                (modified after loading)
Analysis Method: C:\CHEM32\1\METHODS\AD-02-30-0.5.M
Last changed   : 10/17/2021 9:25:08 PM
                (modified after loading)
Additional Info : Peak(s) manually integrated
    
```

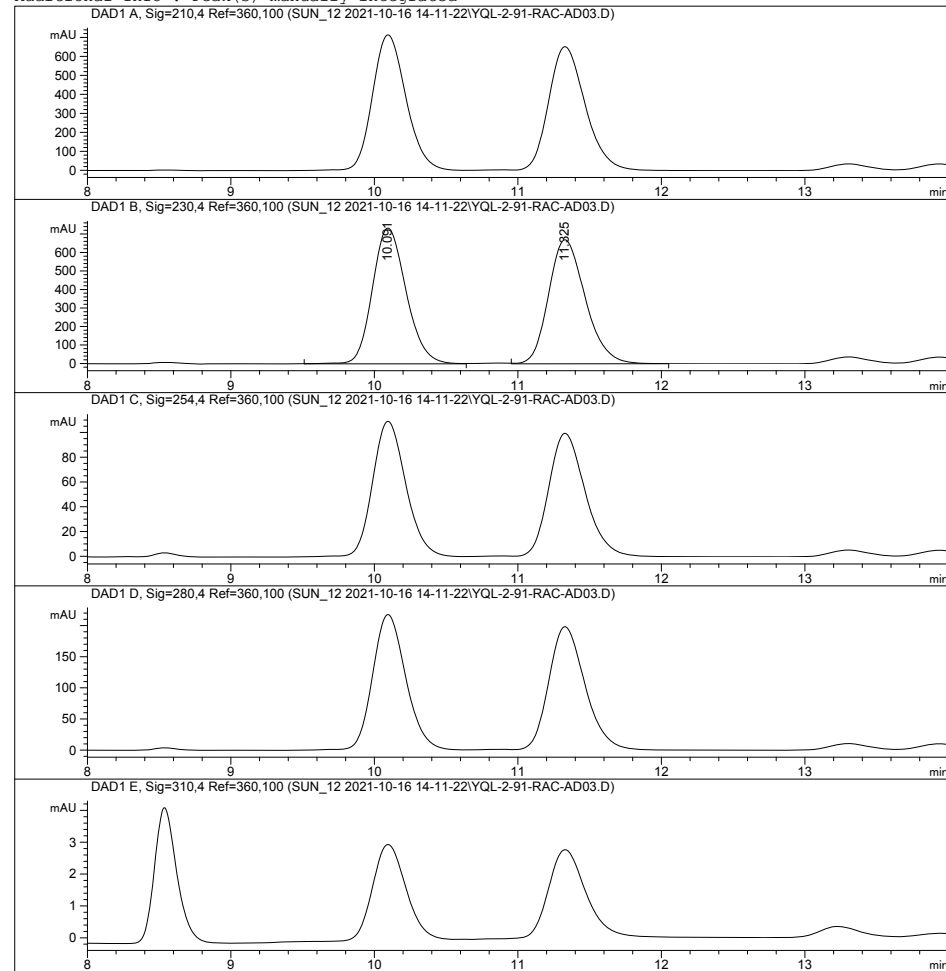

Sample Name:

## Area Percent Report

```

=====
Sorted By           :      Signal
Multiplier          :      1.0000
Dilution            :      1.0000
Use Multiplier & Dilution Factor with ISTDs
    
```

Signal 1: DAD1 A, Sig=210,4 Ref=360,100

Signal 2: DAD1 B, Sig=230,4 Ref=360,100

| Peak # | RetTime [min] | Type | Width [min] | Area [mAU*s] | Height [mAU] | Area %  |
|--------|---------------|------|-------------|--------------|--------------|---------|
| 1      | 10.091        | BV   | 0.2539      | 1.19447e4    | 733.64148    | 50.0944 |
| 2      | 11.325        | VB   | 0.2752      | 1.18997e4    | 670.18823    | 49.9056 |

Totals : 2.38444e4 1403.82971

Signal 3: DAD1 C, Sig=254,4 Ref=360,100

Signal 4: DAD1 D, Sig=280,4 Ref=360,100

Signal 5: DAD1 E, Sig=310,4 Ref=360,100

\*\*\* End of Report \*\*\*

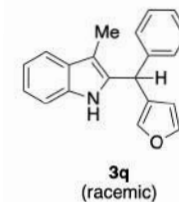

Sample Name:

```

=====
Acq. Operator   :                               Seq. Line :    2
Acq. Instrument : Instrument 1                   Location  : Vial 52
Injection Date  : 10/17/2021 1:08:01 PM         Inj       :    1
                                           Inj Volume: 5.000 µl
Different Inj Volume from Sequence ! Actual Inj Volume : 10.000 µl
Acq. Method    : C:\CHEM32\1\DATA\SUN_12 2021-10-17 12-55-12\AD-03-20.M
Last changed   : 7/2/2016 3:26:02 PM
Analysis Method : C:\CHEM32\1\METHODS\AD-02-30-0.5.M
Last changed   : 10/17/2021 9:25:08 PM
                (modified after loading)
Additional Info : Peak(s) manually integrated
  
```

Additional Info : Peak(s) manually integrated

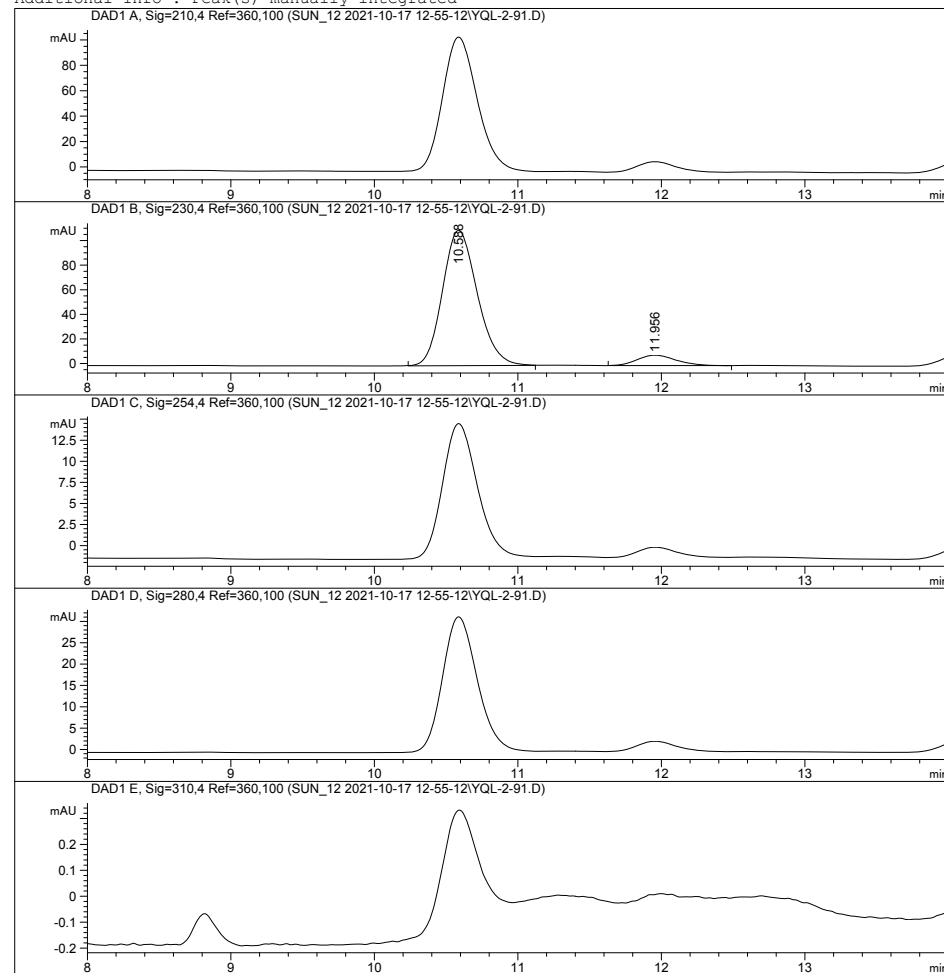

Sample Name:

## Area Percent Report

```

Sorted By      :      Signal
Multiplier    :      1.0000
Dilution      :      1.0000
Use Multiplier & Dilution Factor with ISTDs
  
```

Signal 1: DAD1 A, Sig=210,4 Ref=360,100

Signal 2: DAD1 B, Sig=230,4 Ref=360,100

| Peak # | RetTime [min] | Type | Width [min] | Area [mAU*s] | Height [mAU] | Area %  |
|--------|---------------|------|-------------|--------------|--------------|---------|
| 1      | 10.588        | BB   | 0.2623      | 1850.40784   | 109.97727    | 92.1284 |
| 2      | 11.956        | BB   | 0.2877      | 158.10217    | 8.47325      | 7.8716  |

Totals : 2008.51001 118.45052

Signal 3: DAD1 C, Sig=254,4 Ref=360,100

Signal 4: DAD1 D, Sig=280,4 Ref=360,100

Signal 5: DAD1 E, Sig=310,4 Ref=360,100

\*\*\* End of Report \*\*\*

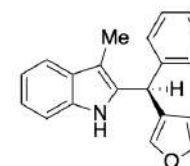

**3q**  
(enantioenriched)

```

=====
Acq. Operator   :                               Seq. Line :    2
Acq. Instrument : Instrument 1                  Location  : Vial 51
Injection Date  : 3/4/2022 8:27:04 PM          Inj       :    1
                                                Inj Volume: 5.000 µl
Different Inj Volume from Sequence ! Actual Inj Volume : 10.000 µl
Acq. Method    : C:\CHEM32\1\DATA\SUN_12 2022-03-04 20-14-13\OD-12-25.M
Last changed   : 7/25/2016 11:18:52 AM
Analysis Method : C:\CHEM32\1\METHODS\OD-03-60-0.6.M
Last changed   : 3/14/2022 9:24:14 AM
                (modified after loading)
    
```

Additional Info : Peak(s) manually integrated

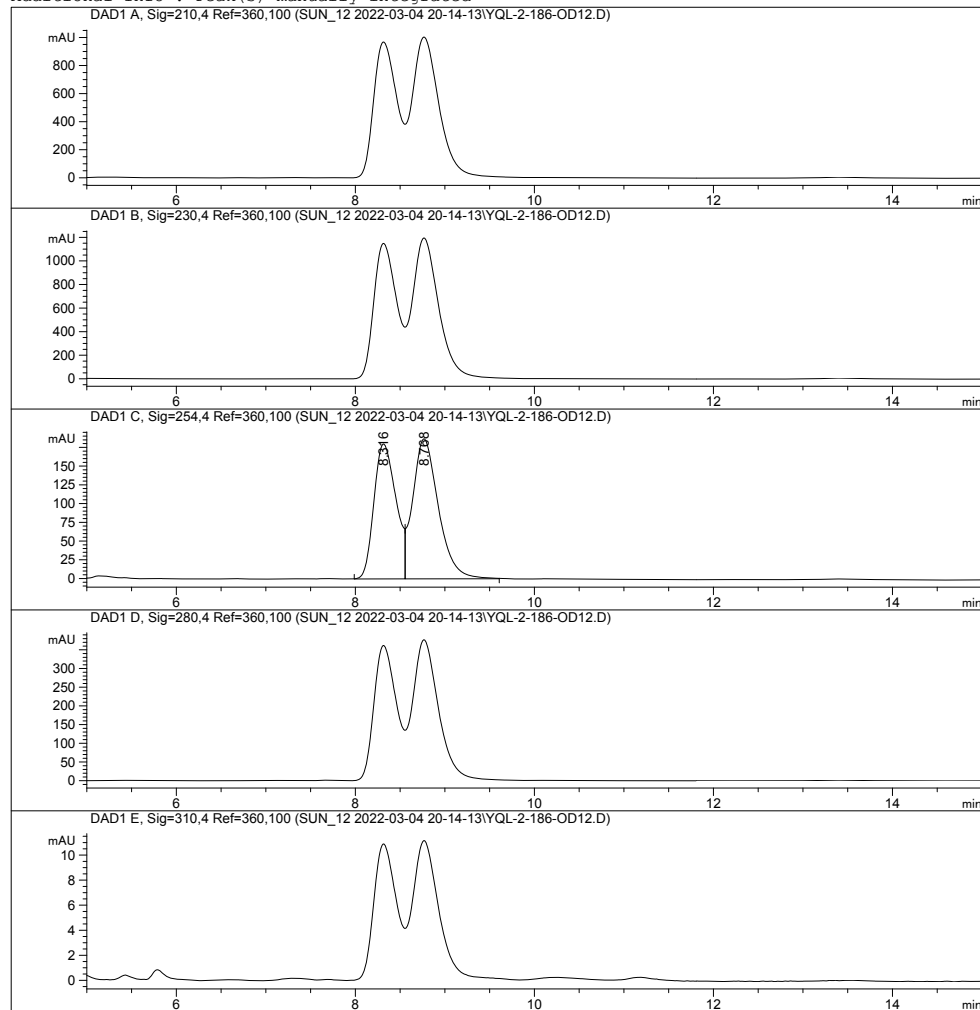

Area Percent Report

```

=====
Sorted By      : Signal
Multiplier     : 1.0000
Dilution       : 1.0000
Use Multiplier & Dilution Factor with ISTDs
    
```

Signal 1: DAD1 A, Sig=210,4 Ref=360,100

Signal 2: DAD1 B, Sig=230,4 Ref=360,100

Signal 3: DAD1 C, Sig=254,4 Ref=360,100

| Peak # | RetTime [min] | Type | Width [min] | Area [mAU*s] | Height [mAU] | Area %  |
|--------|---------------|------|-------------|--------------|--------------|---------|
| 1      | 8.316         | BV   | 0.2657      | 3081.24341   | 180.02193    | 45.2915 |
| 2      | 8.768         | VB   | 0.2984      | 3721.89697   | 186.80836    | 54.7085 |

Totals : 6803.14038 366.83029

Signal 4: DAD1 D, Sig=280,4 Ref=360,100

Signal 5: DAD1 E, Sig=310,4 Ref=360,100

\*\*\* End of Report \*\*\*

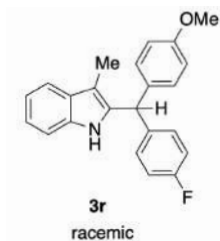

```
=====
Acq. Operator   :                               Seq. Line :   13
Acq. Instrument : Instrument 1                  Location  : Vial 53
Injection Date  : 3/13/2022 9:56:59 PM         Inj       :    1
                                           Inj Volume: 5.000 µl
Different Inj Volume from Sequence ! Actual Inj Volume : 10.000 µl
Acq. Method    : C:\CHEM32\1\DATA\SUN_12 2022-03-13 18-54-13\OD-12-25.M
Last changed   : 7/25/2016 11:18:52 AM
Analysis Method: C:\CHEM32\1\METHODS\OD-03-60-0.6.M
Last changed   : 3/14/2022 9:24:14 AM
                   (modified after loading)
Additional Info : Peak(s) manually integrated
=====
```

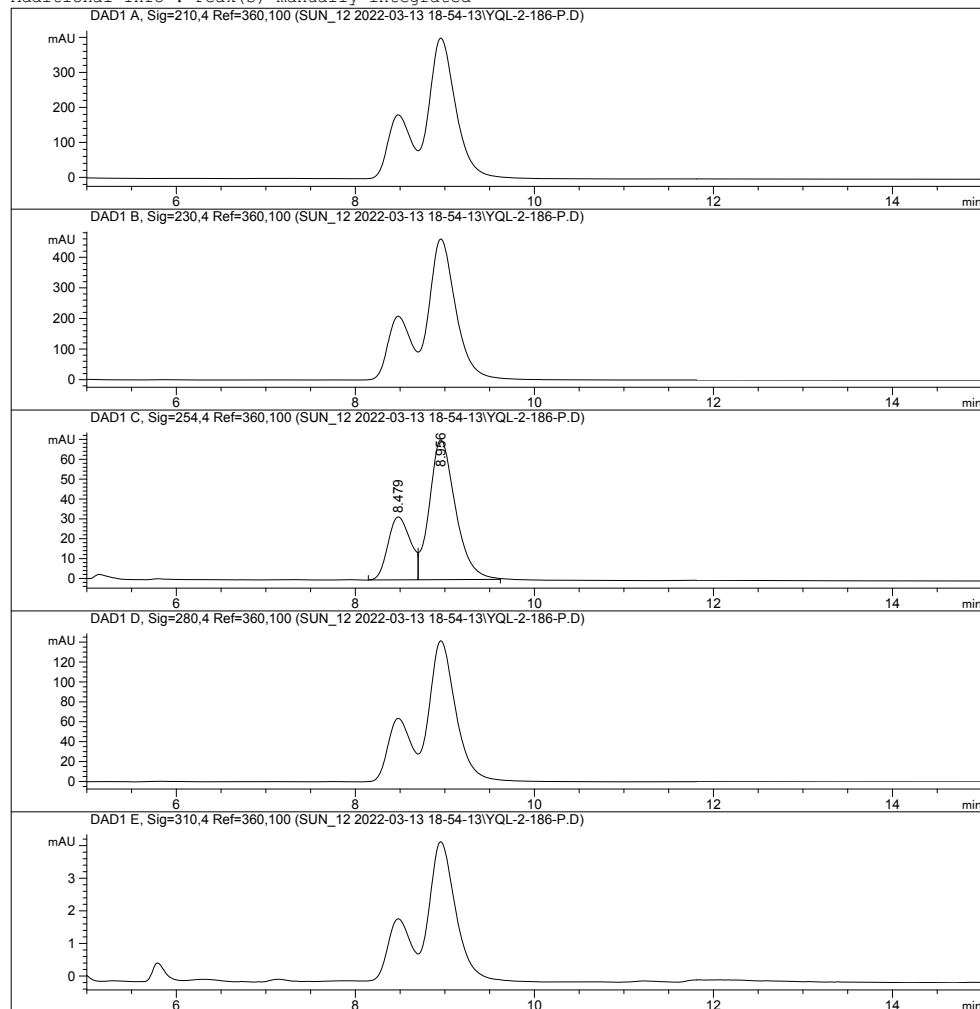

=====  
 Area Percent Report  
 =====

```
Sorted By      : Signal
Multiplier     : 1.0000
Dilution       : 1.0000
Use Multiplier & Dilution Factor with ISTDs
```

Signal 1: DAD1 A, Sig=210,4 Ref=360,100

Signal 2: DAD1 B, Sig=230,4 Ref=360,100

Signal 3: DAD1 C, Sig=254,4 Ref=360,100

| Peak # | RetTime [min] | Type | Width [min] | Area [mAU*s] | Height [mAU] | Area %  |
|--------|---------------|------|-------------|--------------|--------------|---------|
| 1      | 8.479         | BV   | 0.2707      | 550.52435    | 31.69091     | 27.9239 |
| 2      | 8.956         | VB   | 0.3035      | 1420.99011   | 70.38960     | 72.0761 |

Totals : 1971.51447 102.08051

Signal 4: DAD1 D, Sig=280,4 Ref=360,100

Signal 5: DAD1 E, Sig=310,4 Ref=360,100

=====  
 \*\*\* End of Report \*\*\*

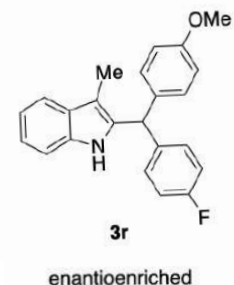

Supplement: d2sc00636g1.pdf [file d2sc00636g1.pdf]
